# Supplementary material for: Broad-Specificity mRNA–rRNA Complementarity in Efficient Protein Translation
Source: PLoS Genet. 2012 Mar 22;8(3):e1002598. doi: 10.1371/journal.pgen.1002598 (PMC3310771; doi:10.1371/journal.pgen.1002598)
Supplement: Table S3 — Co-occurrence of significant motifs. The number of sequences that contain both motif 1 and motif 2 is reported as “coincidence.” The co-occurrence metric is: coincidence/(motif 2 incidence). (XLS) [file pgen.1002598.s008.xls]

## Sheet: 4
Motifs	Motif 1	Motif 2	Coincidence	Motif 1 incidence	Motif 2 incidence	Co-occurrence metric
CCCC|TCCA	CCCC	TCCA	99	2178	350	0.282857
CCAC|CTCA	CCAC	CTCA	128	1628	462	0.277056
CCCC|TCCG	CCCC	TCCG	101	2178	374	0.270053
CCGC|TCCA	CCGC	TCCA	93	1504	350	0.265714
CCAC|TCAC	CCAC	TCAC	133	1628	509	0.261297
CCAC|GCTC	CCAC	GCTC	101	1628	388	0.260309
CCCC|CTCC	CCCC	CTCC	253	2178	978	0.258691
CACC|GCCT	CACC	GCCT	106	1597	414	0.256039
CGCC|CTCC	CGCC	CTCC	248	1563	978	0.253579
CCAC|CGCT	CCAC	CGCT	116	1628	458	0.253275
CCAC|TCGC	CCAC	TCGC	116	1628	461	0.251627
CGCC|TCCC	CGCC	TCCC	204	1563	819	0.249084
CCCC|GCCA	CCCC	GCCA	148	2178	596	0.248322
CCAC|CCTA	CCAC	CCTA	91	1628	367	0.247956
AACA|GAGG	GAGG	AACA	86	736	347	0.247839
CCCC|TGCC	CCCC	TGCC	92	2178	373	0.246649
CGCC|TCCA	CGCC	TCCA	86	1563	350	0.245714
ACCT|CCCC	CCCC	ACCT	117	2178	477	0.245283
CCCC|CCTA	CCCC	CCTA	90	2178	367	0.245232
CGCC|GCTC	CGCC	GCTC	95	1563	388	0.244845
CCCC|CCTC	CCCC	CCTC	286	2178	1170	0.244444
CACC|CAGC	CACC	CAGC	85	1597	349	0.243553
AACC|CACC	CACC	AACC	113	1597	468	0.241453
CGCC|TGCC	CGCC	TGCC	90	1563	373	0.241287
CGCC|TCCG	CGCC	TCCG	90	1563	374	0.240642
CCAC|CCCT	CCAC	CCCT	255	1628	1060	0.240566
CCAC|TCCC	CCAC	TCCC	197	1628	819	0.240537
ACCC|CACC	CACC	ACCC	296	1597	1231	0.240455
CCAC|CCTC	CCAC	CCTC	280	1628	1170	0.239316
CCAC|TGCC	CCAC	TGCC	89	1628	373	0.238606
CACC|GCCC	CACC	GCCC	314	1597	1318	0.23824
ACCC|CGCC	CGCC	ACCC	293	1563	1231	0.238018
CCAC|GCCG	CCAC	GCCG	130	1628	547	0.23766
CCAC|CTCC	CCAC	CTCC	232	1628	978	0.237219
CACC|GCTC	CACC	GCTC	92	1597	388	0.237113
ACTC|CGCC	CGCC	ACTC	101	1563	426	0.237089
CCAC|CTCG	CCAC	CTCG	109	1628	460	0.236957
CCCC|TCCC	CCCC	TCCC	194	2178	819	0.236874
CCAC|CCCG	CCAC	CCCG	290	1628	1229	0.235964
CCCC|CTAC	CCCC	CTAC	97	2178	412	0.235437
CACC|TCCC	CACC	TCCC	192	1597	819	0.234432
CCAC|GCCT	CCAC	GCCT	97	1628	414	0.2343
AACA|GGAG	GGAG	AACA	81	644	347	0.233429
ACCC|CCCC	CCCC	ACCC	287	2178	1231	0.233144
CCCC|CGCC	CCCC	CGCC	364	2178	1563	0.232885
CCCC|TCGC	CCCC	TCGC	107	2178	461	0.232104
CACC|CTCA	CACC	CTCA	107	1597	462	0.231602
ACCC|CCAC	CCAC	ACCC	285	1628	1231	0.231519
CCAA|CCCC	CCCC	CCAA	103	2178	445	0.231461
CCCC|CCCT	CCCC	CCCT	245	2178	1060	0.231132
CCCA|CCCC	CCCC	CCCA	269	2178	1164	0.2311
CCAC|CCGC	CCAC	CCGC	347	1628	1504	0.230718
CACC|CCTC	CACC	CCTC	269	1597	1170	0.229915
CCAA|CCAC	CCAC	CCAA	102	1628	445	0.229213
CATC|CGCC	CGCC	CATC	96	1563	419	0.229117
CCCG|TCCA	CCCG	TCCA	80	1229	350	0.228571
CACC|TCAC	CACC	TCAC	116	1597	509	0.227898
CCGC|TGCC	CCGC	TGCC	85	1504	373	0.227882
CCAC|CCGA	CCAC	CCGA	114	1628	502	0.227092
CCCA|CCGC	CCGC	CCCA	264	1504	1164	0.226804
CCGC|GCTC	CCGC	GCTC	88	1504	388	0.226804
CCCA|CGCC	CGCC	CCCA	264	1563	1164	0.226804
CACC|CCCG	CACC	CCCG	277	1597	1229	0.225386
ACTC|CCCC	CCCC	ACTC	96	2178	426	0.225352
CCAC|CTGC	CCAC	CTGC	89	1628	395	0.225316
CCGC|TCCG	CCGC	TCCG	84	1504	374	0.224599
CCCC|GCCC	CCCC	GCCC	296	2178	1318	0.224583
CACC|CCCT	CACC	CCCT	238	1597	1060	0.224528
CCCT|CGCC	CGCC	CCCT	238	1563	1060	0.224528
CGAC|CGCC	CGCC	CGAC	154	1563	686	0.22449
CCCC|GCTC	CCCC	GCTC	87	2178	388	0.224227
CACC|CTCC	CACC	CTCC	219	1597	978	0.223926
CCAT|CGCC	CGCC	CCAT	76	1563	340	0.223529
CACC|TCGC	CACC	TCGC	103	1597	461	0.223427
CCAC|CGCC	CCAC	CGCC	348	1628	1563	0.222649
CCCC|CTCG	CCCC	CTCG	102	2178	460	0.221739
CCGC|TCGC	CCGC	TCGC	102	1504	461	0.221258
CCCC|GCCG	CCCC	GCCG	121	2178	547	0.221207
CACC|CCCC	CCCC	CACC	353	2178	1597	0.221039
CACG|CCCC	CCCC	CACG	167	2178	756	0.220899
CGCC|CTCA	CGCC	CTCA	102	1563	462	0.220779
CCAT|CCCC	CCCC	CCAT	75	2178	340	0.220588
CCCC|CTGC	CCCC	CTGC	87	2178	395	0.220253
CCGC|CTCC	CCGC	CTCC	215	1504	978	0.219836
CTCC|GCCC	GCCC	CTCC	215	1318	978	0.219836
CCCC|GCCT	CCCC	GCCT	91	2178	414	0.219807
CATC|CCAC	CCAC	CATC	92	1628	419	0.21957
CCGC|TCCC	CCGC	TCCC	179	1504	819	0.218559
CACT|CCGC	CCGC	CACT	100	1504	458	0.218341
CACC|CGCC	CACC	CGCC	341	1597	1563	0.21817
CAGC|CGCC	CGCC	CAGC	76	1563	349	0.217765
ACCG|CCAC	CCAC	ACCG	140	1628	643	0.217729
ACCG|CCGC	CCGC	ACCG	140	1504	643	0.217729
AGCC|CACC	CACC	AGCC	84	1597	386	0.217617
CACC|TCCA	CACC	TCCA	76	1597	350	0.217143
CGCC|TCGC	CGCC	TCGC	100	1563	461	0.21692
CAAC|CCCC	CCCC	CAAC	136	2178	627	0.216906
CCAC|GCCA	CCAC	GCCA	129	1628	596	0.216443
AACC|CCCC	CCCC	AACC	101	2178	468	0.215812
CACC|CCCA	CACC	CCCA	251	1597	1164	0.215636
CACC|CGGC	CACC	CGGC	100	1597	464	0.215517
CCAC|GCCC	CCAC	GCCC	284	1628	1318	0.215478
CACC|CCGC	CACC	CCGC	324	1597	1504	0.215426
CAGC|CCAC	CCAC	CAGC	75	1628	349	0.2149
GCCC|TCGC	GCCC	TCGC	99	1318	461	0.214751
CCTC|CGCC	CGCC	CCTC	251	1563	1170	0.21453
ACCC|CCGC	CCGC	ACCC	264	1504	1231	0.21446
CCAC|TCCA	CCAC	TCCA	75	1628	350	0.214286
CCGC|CTCA	CCGC	CTCA	99	1504	462	0.214286
CCCT|CCGC	CCGC	CCCT	227	1504	1060	0.214151
ACCC|TCAC	ACCC	TCAC	109	1231	509	0.214145
CCCC|TCAC	CCCC	TCAC	109	2178	509	0.214145
CGCC|TCAC	CGCC	TCAC	109	1563	509	0.214145
CCCC|CGCT	CCCC	CGCT	98	2178	458	0.213974
CCAC|CCGT	CCAC	CCGT	92	1628	430	0.213953
CCGC|CCGT	CCGC	CCGT	92	1504	430	0.213953
ACCT|CGCC	CGCC	ACCT	102	1563	477	0.213836
CCAC|CGCC	CGCC	CCAC	348	1563	1628	0.213759
ACTC|CCAC	CCAC	ACTC	91	1628	426	0.213615
CCAC|CTAC	CCAC	CTAC	88	1628	412	0.213592
CACC|CGCC	CGCC	CACC	341	1563	1597	0.213525
CGCC|GCCC	CGCC	GCCC	281	1563	1318	0.213202
CCGA|CGCC	CGCC	CCGA	107	1563	502	0.213147
CCAC|CCGC	CCGC	CCAC	347	1504	1628	0.213145
CCCC|CGAC	CCCC	CGAC	146	2178	686	0.212828
CCCC|GCGC	CCCC	GCGC	138	2178	649	0.212635
GCCC|TGCC	GCCC	TGCC	79	1318	373	0.211796
ACCA|CCCC	CCCC	ACCA	128	2178	605	0.21157
CCGC|CCTC	CCGC	CCTC	247	1504	1170	0.211111
CCAC|CCGG	CCAC	CCGG	77	1628	365	0.210959
CCCG|CGCC	CGCC	CCCG	259	1563	1229	0.21074
CCAC|CCCC	CCCC	CCAC	343	2178	1628	0.210688
CACC|CGTC	CACC	CGTC	93	1597	442	0.210407
CATC|CCGC	CCGC	CATC	88	1504	419	0.210024
AGCC|CGCC	CGCC	AGCC	81	1563	386	0.209845
CACC|CACT	CACC	CACT	96	1597	458	0.209607
CGCC|CGCT	CGCC	CGCT	96	1563	458	0.209607
CAGC|CCCC	CCCC	CAGC	73	2178	349	0.209169
CCCC|CCCG	CCCC	CCCG	257	2178	1229	0.209113
GCCC|TCCA	GCCC	TCCA	73	1318	350	0.208571
ACCG|CCCC	CCCC	ACCG	134	2178	643	0.208398
CACC|GCAC	CACC	GCAC	136	1597	653	0.20827
CCAC|CGCA	CCAC	CGCA	140	1628	674	0.207715
CATC|CCCC	CCCC	CATC	87	2178	419	0.207637
CGCC|CTGC	CGCC	CTGC	82	1563	395	0.207595
AGCC|CCAC	CCAC	AGCC	80	1628	386	0.207254
ACCA|CACC	CACC	ACCA	125	1597	605	0.206612
CCGC|GACC	CCGC	GACC	119	1504	576	0.206597
CACC|GCCG	CACC	GCCG	113	1597	547	0.206581
CACC|CTCG	CACC	CTCG	95	1597	460	0.206522
CCCC|CGTC	CCCC	CGTC	91	2178	442	0.205882
CCGC|CGTC	CCGC	CGTC	91	1504	442	0.205882
CAAC|CCAC	CCAC	CAAC	129	1628	627	0.205742
CCCA|CTCA	CCCA	CTCA	95	1164	462	0.205628
CCAC|CGAC	CCAC	CGAC	141	1628	686	0.205539
CCCC|CCGG	CCCC	CCGG	75	2178	365	0.205479
CGCC|GCCT	CGCC	GCCT	85	1563	414	0.205314
CACT|CGCC	CGCC	CACT	94	1563	458	0.20524
AACC|CCAC	CCAC	AACC	96	1628	468	0.205128
GCCC|TCCC	GCCC	TCCC	168	1318	819	0.205128
CCGC|CCTA	CCGC	CCTA	75	1504	367	0.20436
CCCC|CCGC	CCCC	CCGC	307	2178	1504	0.204122
CCGC|CGAC	CCGC	CGAC	140	1504	686	0.204082
ACCG|CCCG	CCCG	ACCG	131	1229	643	0.203733
CACG|CGCC	CGCC	CACG	154	1563	756	0.203704
CCAC|GCAC	CCAC	GCAC	133	1628	653	0.203675
CCAC|CGTC	CCAC	CGTC	90	1628	442	0.20362
CCCC|CTCA	CCCC	CTCA	94	2178	462	0.203463
CACC|CCTG	CACC	CCTG	84	1597	413	0.20339
CCAC|CCTG	CCAC	CCTG	84	1628	413	0.20339
CCCC|CCTG	CCCC	CCTG	84	2178	413	0.20339
CACC|CGCA	CACC	CGCA	137	1597	674	0.203264
CCCC|CCGA	CCCC	CCGA	102	2178	502	0.203187
CCAC|GACC	CCAC	GACC	117	1628	576	0.203125
CACT|CCAC	CCAC	CACT	93	1628	458	0.203057
CCGC|CGCT	CCGC	CGCT	93	1504	458	0.203057
CCAC|CCAT	CCAC	CCAT	69	1628	340	0.202941
CCAT|CCGC	CCGC	CCAT	69	1504	340	0.202941
CACC|CCGC	CCGC	CACC	324	1504	1597	0.20288
CCCC|GTCC	CCCC	GTCC	71	2178	350	0.202857
CCCG|CCGG	CCCG	CCGG	74	1229	365	0.20274
CCGC|CCGG	CCGC	CCGG	74	1504	365	0.20274
ACCG|CGCC	CGCC	ACCG	130	1563	643	0.202177
CCCA|CCTA	CCCA	CCTA	74	1164	367	0.201635
ACCC|GCCC	GCCC	ACCC	248	1318	1231	0.201462
CGCC|CTAC	CGCC	CTAC	83	1563	412	0.201456
CACC|GCCA	CACC	GCCA	120	1597	596	0.201342
CAGC|CCGC	CCGC	CAGC	70	1504	349	0.200573
GCCC|GCCT	GCCC	GCCT	83	1318	414	0.200483
GCCC|TCAC	GCCC	TCAC	102	1318	509	0.200393
CACC|CCAA	CACC	CCAA	89	1597	445	0.2
CGCC|CTCG	CGCC	CTCG	92	1563	460	0.2
CCTC|GCCC	GCCC	CCTC	234	1318	1170	0.2
GCCA|GCCC	GCCC	GCCA	119	1318	596	0.199664
CGCC|GACC	CGCC	GACC	115	1563	576	0.199653
ACTC|CCGC	CCGC	ACTC	85	1504	426	0.199531
AGCC|CCGC	CCGC	AGCC	77	1504	386	0.199482
CGCC|CGTC	CGCC	CGTC	88	1563	442	0.199095
CACC|CCTA	CACC	CCTA	73	1597	367	0.19891
CACC|GCGC	CACC	GCGC	129	1597	649	0.198767
CCAC|CCCA	CCAC	CCCA	231	1628	1164	0.198454
CCGC|CGGC	CCGC	CGGC	92	1504	464	0.198276
CCGC|GCCC	CCGC	GCCC	261	1504	1318	0.198027
CGCC|GCCA	CGCC	GCCA	118	1563	596	0.197987
CCCC|GACC	CCCC	GACC	114	2178	576	0.197917
GCCC|TCCG	GCCC	TCCG	74	1318	374	0.197861
CAAC|CGCC	CGCC	CAAC	124	1563	627	0.197767
CAGC|GCCC	GCCC	CAGC	69	1318	349	0.197708
CACC|CTGC	CACC	CTGC	78	1597	395	0.197468
CCGC|CTGC	CCGC	CTGC	78	1504	395	0.197468
CCGA|CCGC	CCGC	CCGA	99	1504	502	0.197211
CCCT|GCCC	GCCC	CCCT	209	1318	1060	0.19717
CCCA|TCCA	CCCA	TCCA	69	1164	350	0.197143
CGCC|GTCC	CGCC	GTCC	69	1563	350	0.197143
ACCT|CCAC	CCAC	ACCT	94	1628	477	0.197065
CCGC|CGCC	CGCC	CCGC	296	1563	1504	0.196809
CACC|GCCC	GCCC	CACC	314	1318	1597	0.196619
ACGC|CCCC	CCCC	ACGC	155	2178	789	0.196451
CCCG|CTCC	CCCG	CTCC	192	1229	978	0.196319
CCAC|CGGC	CCAC	CGGC	91	1628	464	0.196121
CGCC|GCAC	CGCC	GCAC	128	1563	653	0.196018
ACCG|CACC	CACC	ACCG	126	1597	643	0.195956
CCAA|CGCC	CGCC	CCAA	87	1563	445	0.195506
CCAC|TCCG	CCAC	TCCG	73	1628	374	0.195187
CTGC|GCCC	GCCC	CTGC	77	1318	395	0.194937
CCCG|CCGC	CCGC	CCCG	239	1504	1229	0.194467
CACG|CCAC	CCAC	CACG	147	1628	756	0.194444
ACCC|TCCA	ACCC	TCCA	68	1231	350	0.194286
CACC|GTCC	CACC	GTCC	68	1597	350	0.194286
CCGC|GTCC	CCGC	GTCC	68	1504	350	0.194286
GCCC|GTCC	GCCC	GTCC	68	1318	350	0.194286
ACCA|CGCC	CGCC	ACCA	117	1563	605	0.193388
GCCC|GCTC	GCCC	GCTC	75	1318	388	0.193299
CACC|CACG	CACC	CACG	146	1597	756	0.193122
AACA|AGGA	AGGA	AACA	67	718	347	0.193084
CCCG|TCGC	CCCG	TCGC	89	1229	461	0.193059
CACC|GACC	CACC	GACC	111	1597	576	0.192708
CCCC|CGCG	CCCC	CGCG	141	2178	732	0.192623
CCCG|TCCG	CCCG	TCCG	72	1229	374	0.192513
ACTC|CACC	CACC	ACTC	82	1597	426	0.192488
CCCG|CGAC	CCCG	CGAC	132	1229	686	0.19242
CGTC|GCCC	GCCC	CGTC	85	1318	442	0.192308
CCGC|GCCG	CCGC	GCCG	105	1504	547	0.191956
CCCC|CGGC	CCCC	CGGC	89	2178	464	0.19181
CCCC|GCAC	CCCC	GCAC	125	2178	653	0.191424
CCGC|GCAC	CCGC	GCAC	125	1504	653	0.191424
ACCC|CTCC	ACCC	CTCC	187	1231	978	0.191207
CACC|CCAT	CACC	CCAT	65	1597	340	0.191176
CCAT|CCCG	CCCG	CCAT	65	1229	340	0.191176
CCAC|GCGC	CCAC	GCGC	124	1628	649	0.191063
CCGC|GCCT	CCGC	GCCT	79	1504	414	0.190821
ACCT|CCTC	CCTC	ACCT	91	1170	477	0.190776
CCTA|CGCC	CGCC	CCTA	70	1563	367	0.190736
CCTC|TCCC	CCTC	TCCC	156	1170	819	0.190476
CCCG|TGCC	CCCG	TGCC	71	1229	373	0.190349
AACC|CGCC	CGCC	AACC	89	1563	468	0.190171
ACCA|ACCC	ACCC	ACCA	115	1231	605	0.190083
CACT|CCCC	CCCC	CACT	87	2178	458	0.189956
CGCT|GCCC	GCCC	CGCT	87	1318	458	0.189956
ACCC|ACCG	ACCC	ACCG	122	1231	643	0.189736
ACCG|GCCC	GCCC	ACCG	122	1318	643	0.189736
CGCC|CGGC	CGCC	CGGC	88	1563	464	0.189655
CCGC|GCCA	CCGC	GCCA	113	1504	596	0.189597
CCGC|CGCC	CCGC	CGCC	296	1504	1563	0.189379
CAGC|CCCA	CCCA	CAGC	66	1164	349	0.189112
CACC|CCGG	CACC	CCGG	69	1597	365	0.189041
CCTC|CCTG	CCTC	CCTG	78	1170	413	0.188862
ACCT|CCGC	CCGC	ACCT	90	1504	477	0.188679
CACC|CATC	CACC	CATC	79	1597	419	0.188544
CATC|CCCA	CCCA	CATC	79	1164	419	0.188544
CACC|CCGT	CACC	CCGT	81	1597	430	0.188372
CCCC|CCGT	CCCC	CCGT	81	2178	430	0.188372
ACCC|GCCC	ACCC	GCCC	248	1231	1318	0.188164
ACCC|GCTC	ACCC	GCTC	73	1231	388	0.188144
CCCA|GCTC	CCCA	GCTC	73	1164	388	0.188144
ACCC|TCCC	ACCC	TCCC	154	1231	819	0.188034
CACG|CCGC	CCGC	CACG	142	1504	756	0.187831
ACTC|CCCG	CCCG	ACTC	80	1229	426	0.187793
CACC|CGCT	CACC	CGCT	86	1597	458	0.187773
CCCA|CGCT	CCCA	CGCT	86	1164	458	0.187773
CCCG|CCCT	CCCG	CCCT	199	1229	1060	0.187736
ACGC|CCAC	CCAC	ACGC	148	1628	789	0.187579
ACCC|CGCC	ACCC	CGCC	293	1231	1563	0.18746
CCCA|CTGC	CCCA	CTGC	74	1164	395	0.187342
CACC|TCCG	CACC	TCCG	70	1597	374	0.187166
CCTC|TCCG	CCTC	TCCG	70	1170	374	0.187166
ACCA|CCAC	CCAC	ACCA	113	1628	605	0.186777
CAAC|CACC	CACC	CAAC	117	1597	627	0.186603
CCCA|CCCG	CCCG	CCCA	217	1229	1164	0.186426
CCGT|CGCC	CGCC	CCGT	80	1563	430	0.186047
GACC|GCCC	GCCC	GACC	107	1318	576	0.185764
CCAC|GTCC	CCAC	GTCC	65	1628	350	0.185714
CCTC|GTCC	CCTC	GTCC	65	1170	350	0.185714
ACCC|CACC	ACCC	CACC	296	1231	1597	0.185348
ACCA|CCGC	CCGC	ACCA	112	1504	605	0.185124
CACC|CCAC	CCAC	CACC	295	1628	1597	0.184721
CCCG|CCTC	CCCG	CCTC	216	1229	1170	0.184615
ACCT|CACC	CACC	ACCT	88	1597	477	0.184486
CCGG|CGCC	CGCC	CCGG	67	1563	365	0.183562
CCCG|CGCT	CCCG	CGCT	84	1229	458	0.183406
GCCC|GCGC	GCCC	GCGC	119	1318	649	0.183359
CCAC|CGCG	CCAC	CGCG	134	1628	732	0.18306
CCCA|CCTC	CCTC	CCCA	213	1170	1164	0.18299
CCCG|CTCG	CCCG	CTCG	84	1229	460	0.182609
CCAC|GGCC	CCAC	GGCC	78	1628	428	0.182243
CCCC|GGCC	CCCC	GGCC	78	2178	428	0.182243
CGAC|GCCC	GCCC	CGAC	125	1318	686	0.182216
CCCA|CCTC	CCCA	CCTC	213	1164	1170	0.182051
CACC|CTAC	CACC	CTAC	75	1597	412	0.182039
CGCC|GCGC	CGCC	GCGC	118	1563	649	0.181818
CACT|CCCG	CCCG	CACT	83	1229	458	0.181223
CACC|CCAC	CACC	CCAC	295	1597	1628	0.181204
CCGG|GCCC	GCCC	CCGG	66	1318	365	0.180822
CCCG|GACC	CCCG	GACC	104	1229	576	0.180556
ACCT|GCCC	GCCC	ACCT	86	1318	477	0.180294
CACC|GGCC	CACC	GGCC	77	1597	428	0.179907
CCCG|CCTA	CCCG	CCTA	66	1229	367	0.179837
CGCC|GCCC	GCCC	CGCC	281	1318	1563	0.179782
CCAA|CCGC	CCGC	CCAA	80	1504	445	0.179775
CTCA|GCCC	GCCC	CTCA	83	1318	462	0.179654
ACCC|CACT	ACCC	CACT	82	1231	458	0.179039
ACCC|CATC	ACCC	CATC	75	1231	419	0.178998
CCCA|TCAC	CCCA	TCAC	91	1164	509	0.178782
CCGC|TCAC	CCGC	TCAC	91	1504	509	0.178782
ACTC|GCCC	GCCC	ACTC	76	1318	426	0.178404
CCAC|CCCG	CCCG	CCAC	290	1229	1628	0.178133
CCCA|CGCA	CCCA	CGCA	120	1164	674	0.178042
CCGC|CGCA	CCGC	CGCA	120	1504	674	0.178042
ACCC|GCCA	ACCC	GCCA	106	1231	596	0.177852
CCTC|GCCC	CCTC	GCCC	234	1170	1318	0.177542
ACGC|CACC	CACC	ACGC	140	1597	789	0.17744
CCCA|CCCT	CCCA	CCCT	188	1164	1060	0.177358
CCCG|CTGC	CCCG	CTGC	70	1229	395	0.177215
ACCC|GTCC	ACCC	GTCC	62	1231	350	0.177143
CCTA|GCCC	GCCC	CCTA	65	1318	367	0.177112
CTCC|TCCC	CTCC	TCCC	145	978	819	0.177045
CACC|TGCC	CACC	TGCC	66	1597	373	0.176944
CCCA|CCCG	CCCA	CCCG	217	1164	1229	0.176566
CCTC|CGTC	CCTC	CGTC	78	1170	442	0.176471
CGCC|CGCG	CGCC	CGCG	129	1563	732	0.17623
CCTC|GCCA	CCTC	GCCA	105	1170	596	0.176174
CCGC|CTCG	CCGC	CTCG	81	1504	460	0.176087
CCCA|CTCC	CCCA	CTCC	172	1164	978	0.175869
CCCG|CCTC	CCTC	CCCG	216	1170	1229	0.175753
ACCC|CCGC	ACCC	CCGC	264	1231	1504	0.175532
CCCA|CCGC	CCCA	CCGC	264	1164	1504	0.175532
ACCC|CCAC	ACCC	CCAC	285	1231	1628	0.175061
CCTC|CTGC	CCTC	CTGC	69	1170	395	0.174684
CCAC|GCCC	GCCC	CCAC	284	1318	1628	0.174447
CCCG|CCTG	CCCG	CCTG	72	1229	413	0.174334
CATC|CCCG	CCCG	CATC	73	1229	419	0.174224
ACCC|CCCG	ACCC	CCCG	214	1231	1229	0.174125
ACCC|CCCG	CCCG	ACCC	214	1229	1231	0.173842
ACAC|CCCC	CCCC	ACAC	146	2178	841	0.173603
CGCA|CGCC	CGCC	CGCA	117	1563	674	0.173591
AGCC|CCCC	CCCC	AGCC	67	2178	386	0.173575
AGCC|GCCC	GCCC	AGCC	67	1318	386	0.173575
CCCA|GCCC	GCCC	CCCA	202	1318	1164	0.17354
CCGC|GCCC	GCCC	CCGC	261	1318	1504	0.173537
CACC|CGCG	CACC	CGCG	127	1597	732	0.173497
CACC|CCCG	CCCG	CACC	277	1229	1597	0.17345
CACC|CCGA	CACC	CCGA	87	1597	502	0.173307
ACCC|CTCA	ACCC	CTCA	80	1231	462	0.17316
AACC|ACCC	ACCC	AACC	81	1231	468	0.173077
CGCC|GGCC	CGCC	GGCC	74	1563	428	0.172897
CCCT|GCCA	CCCT	GCCA	103	1060	596	0.172819
CGGC|GCCC	GCCC	CGGC	80	1318	464	0.172414
CCCA|CTAC	CCCA	CTAC	71	1164	412	0.17233
CCCT|CTGC	CCCT	CTGC	68	1060	395	0.172152
CCAC|CCTC	CCTC	CCAC	280	1170	1628	0.17199
ACCC|CAGC	ACCC	CAGC	60	1231	349	0.17192
ACCT|CCCG	CCCG	ACCT	82	1229	477	0.171908
CACA|CCGC	CCGC	CACA	121	1504	704	0.171875
CCTC|CTCC	CCTC	CTCC	168	1170	978	0.171779
CTCG|GCCC	GCCC	CTCG	79	1318	460	0.171739
ACCG|CCCA	CCCA	ACCG	110	1164	643	0.171073
AACC|CCGC	CCGC	AACC	80	1504	468	0.17094
CCAA|CCCG	CCCG	CCAA	76	1229	445	0.170787
CACG|CCCA	CCCA	CACG	129	1164	756	0.170635
ACCC|CGGC	ACCC	CGGC	79	1231	464	0.170259
CCCG|CGGC	CCCG	CGGC	79	1229	464	0.170259
CCTC|GCTC	CCTC	GCTC	66	1170	388	0.170103
CCGC|CTAC	CCGC	CTAC	70	1504	412	0.169903
CCCA|GCGC	CCCA	GCGC	110	1164	649	0.169492
CATC|GCCC	GCCC	CATC	71	1318	419	0.169451
CACG|GCCC	GCCC	CACG	128	1318	756	0.169312
CCCA|GCCT	CCCA	GCCT	70	1164	414	0.169082
CCCA|CGCC	CCCA	CGCC	264	1164	1563	0.168906
ACAC|CGCC	CGCC	ACAC	142	1563	841	0.168847
CCTC|CTCA	CCTC	CTCA	78	1170	462	0.168831
CACC|CCTC	CCTC	CACC	269	1170	1597	0.168441
ACCC|GACC	ACCC	GACC	97	1231	576	0.168403
ACCC|CCAT	ACCC	CCAT	57	1231	340	0.167647
ACCC|CCTC	ACCC	CCTC	196	1231	1170	0.167521
CCGT|CCTC	CCTC	CCGT	72	1170	430	0.167442
CCGA|GCCC	GCCC	CCGA	84	1318	502	0.167331
CCCC|CGCC	CGCC	CCCC	364	1563	2178	0.167126
CCCT|CTCC	CCCT	CTCC	163	1060	978	0.166667
CAGC|CCCG	CCCG	CAGC	58	1229	349	0.166189
CCCA|GCCA	CCCA	GCCA	99	1164	596	0.166107
CCCG|CGCC	CCCG	CGCC	259	1229	1563	0.165707
ACCT|CCCT	CCCT	ACCT	79	1060	477	0.165618
CCCT|CCTC	CCTC	CCCT	175	1170	1060	0.165094
CACA|CCCC	CCCC	CACA	116	2178	704	0.164773
CCCC|GACA	CCCC	GACA	58	2178	352	0.164773
CACC|CGAC	CACC	CGAC	113	1597	686	0.164723
CCAT|CCCT	CCCT	CCAT	56	1060	340	0.164706
CCAT|GCCC	GCCC	CCAT	56	1318	340	0.164706
CCCG|CGCA	CCCG	CGCA	111	1229	674	0.164688
CCCA|GCCG	CCCA	GCCG	90	1164	547	0.164534
CCCG|GCCA	CCCG	GCCA	98	1229	596	0.16443
CCGC|CCTC	CCTC	CCGC	247	1170	1504	0.164229
CGCG|GCCC	GCCC	CGCG	120	1318	732	0.163934
CCCG|GCAC	CCCG	GCAC	107	1229	653	0.163859
CCTC|TGCC	CCTC	TGCC	61	1170	373	0.163539
CCCC|CGCA	CCCC	CGCA	110	2178	674	0.163205
CTCC|GCCC	CTCC	GCCC	215	978	1318	0.163126
CCTC|TCAC	CCTC	TCAC	83	1170	509	0.163065
CCGT|GCCC	GCCC	CCGT	70	1318	430	0.162791
ACCC|GCCG	ACCC	GCCG	89	1231	547	0.162706
CATC|CCTC	CCTC	CATC	68	1170	419	0.162291
ACGC|GCCC	GCCC	ACGC	128	1318	789	0.162231
CACC|CCCC	CACC	CCCC	353	1597	2178	0.162075
ACCC|CTGC	ACCC	CTGC	64	1231	395	0.162025
CCAC|GACA	CCAC	GACA	57	1628	352	0.161932
CCCG|CCCT	CCCT	CCCG	199	1060	1229	0.16192
CCTC|GCCT	CCTC	GCCT	67	1170	414	0.161836
CCCA|CCCT	CCCT	CCCA	188	1060	1164	0.161512
CCCG|CCGA	CCCG	CCGA	81	1229	502	0.161355
CCCG|TCCC	CCCG	TCCC	132	1229	819	0.161172
CAAC|GCCC	GCCC	CAAC	101	1318	627	0.161085
ACGC|CGCC	CGCC	ACGC	127	1563	789	0.160963
CCCA|CTCG	CCCA	CTCG	74	1164	460	0.16087
ACCC|GCAC	ACCC	GCAC	105	1231	653	0.160796
ACCC|CCCA	ACCC	CCCA	187	1231	1164	0.160653
CCTC|CGCC	CCTC	CGCC	251	1170	1563	0.160589
CACA|CCAC	CCAC	CACA	113	1628	704	0.160511
CCCT|TCCG	CCCT	TCCG	60	1060	374	0.160428
ACCA|CCCG	CCCG	ACCA	97	1229	605	0.160331
TCCA|TCCC	TCCC	TCCA	56	819	350	0.16
CCGC|CGCG	CCGC	CGCG	117	1504	732	0.159836
CCGC|CCTG	CCGC	CCTG	66	1504	413	0.159806
CCCG|GCTC	CCCG	GCTC	62	1229	388	0.159794
ACGC|CCGC	CCGC	ACGC	126	1504	789	0.159696
CCCT|GCCT	CCCT	GCCT	66	1060	414	0.15942
ACCC|ACCT	ACCC	ACCT	76	1231	477	0.159329
GCAC|GCCC	GCCC	GCAC	104	1318	653	0.159265
ACCC|CCTC	CCTC	ACCC	196	1170	1231	0.15922
CCCG|CCGC	CCCG	CCGC	239	1229	1504	0.15891
CCGG|CCTC	CCTC	CCGG	58	1170	365	0.158904
GCCC|GGCC	GCCC	GGCC	68	1318	428	0.158879
ACCC|CACG	ACCC	CACG	120	1231	756	0.15873
CCCT|TCCC	CCCT	TCCC	130	1060	819	0.15873
CGCC|CTCC	CTCC	CGCC	248	978	1563	0.158669
CCCG|GCCC	GCCC	CCCG	195	1318	1229	0.158666
CCCT|GCCC	CCCT	GCCC	209	1060	1318	0.158574
CCTC|TCGC	CCTC	TCGC	73	1170	461	0.158351
AGCC|CCCA	CCCA	AGCC	61	1164	386	0.158031
CAAC|CCCA	CCCA	CAAC	99	1164	627	0.157895
CCCG|CTAC	CCCG	CTAC	65	1229	412	0.157767
CCAC|CCCC	CCAC	CCCC	343	1628	2178	0.157484
CACG|CCCG	CCCG	CACG	119	1229	756	0.157407
CCCA|CGGC	CCCA	CGGC	73	1164	464	0.157328
CGCC|GCCG	CGCC	GCCG	86	1563	547	0.157221
CACC|CCCA	CCCA	CACC	251	1164	1597	0.15717
CCCT|GTCC	CCCT	GTCC	55	1060	350	0.157143
CTCC|GTCC	CTCC	GTCC	55	978	350	0.157143
CCCA|CGCG	CCCA	CGCG	115	1164	732	0.157104
ACCC|GCCT	ACCC	GCCT	65	1231	414	0.157005
CCAC|CCCT	CCCT	CCAC	255	1060	1628	0.156634
ACCC|CCCT	ACCC	CCCT	166	1231	1060	0.156604
CAAC|CCGC	CCGC	CAAC	98	1504	627	0.1563
CACA|CACC	CACC	CACA	110	1597	704	0.15625
CACA|CGCC	CGCC	CACA	110	1563	704	0.15625
GACA|GGAG	GGAG	GACA	55	644	352	0.15625
CCCG|CTCC	CTCC	CCCG	192	978	1229	0.156225
ACCC|TCGC	ACCC	TCGC	72	1231	461	0.156182
CCCT|TCGC	CCCT	TCGC	72	1060	461	0.156182
ACAC|CACC	CACC	ACAC	131	1597	841	0.155767
CTAC|GCCC	GCCC	CTAC	64	1318	412	0.15534
CCTG|GCCC	GCCC	CCTG	64	1318	413	0.154964
ACTC|CCTC	CCTC	ACTC	66	1170	426	0.15493
CAGC|CCTC	CCTC	CAGC	54	1170	349	0.154728
CCCG|GCCT	CCCG	GCCT	64	1229	414	0.154589
ACCC|GGCC	ACCC	GGCC	66	1231	428	0.154206
CCTC|GGCC	CCTC	GGCC	66	1170	428	0.154206
ACCG|CCTC	CCTC	ACCG	99	1170	643	0.153966
CCCT|CGTC	CCCT	CGTC	68	1060	442	0.153846
CGTC|CTCC	CTCC	CGTC	68	978	442	0.153846
AACC|GCCC	GCCC	AACC	72	1318	468	0.153846
CCCT|CTCC	CTCC	CCCT	163	978	1060	0.153774
ACCA|CCTC	CCTC	ACCA	93	1170	605	0.153719
ACCA|GCCC	GCCC	ACCA	93	1318	605	0.153719
CCCG|GCCG	CCCG	GCCG	84	1229	547	0.153565
ACCC|CCGG	ACCC	CCGG	56	1231	365	0.153425
ACAC|GCCC	GCCC	ACAC	129	1318	841	0.153389
CCCA|GCCC	CCCA	GCCC	202	1164	1318	0.153263
CCCG|TCAC	CCCG	TCAC	78	1229	509	0.153242
ACCC|CAAC	ACCC	CAAC	96	1231	627	0.15311
ACCT|CTCC	CTCC	ACCT	73	978	477	0.15304
CCCA|TGCC	CCCA	TGCC	57	1164	373	0.152815
CCCA|TCCC	CCCA	TCCC	125	1164	819	0.152625
CCCT|CCTG	CCCT	CCTG	63	1060	413	0.152542
ACCC|TCCG	ACCC	TCCG	57	1231	374	0.152406
ACGA|CACC	CACC	ACGA	55	1597	361	0.152355
CCCT|CGCC	CCCT	CGCC	238	1060	1563	0.152271
CCCT|CTCG	CCCT	CTCG	70	1060	460	0.152174
ACCC|CCCA	CCCA	ACCC	187	1164	1231	0.151909
ACCC|CTCC	CTCC	ACCC	187	978	1231	0.151909
CCTC|GCCG	CCTC	GCCG	83	1170	547	0.151737
CCAC|GACG	CCAC	GACG	58	1628	383	0.151436
CCCA|GTCC	CCCA	GTCC	53	1164	350	0.151429
CCCG|GTCC	CCCG	GTCC	53	1229	350	0.151429
CCCA|CCGA	CCCA	CCGA	76	1164	502	0.151394
CGCA|GCCC	GCCC	CGCA	102	1318	674	0.151335
ACCT|CCCA	CCCA	ACCT	72	1164	477	0.150943
CCCT|CCGC	CCCT	CCGC	227	1060	1504	0.150931
CCCA|CCGG	CCCA	CCGG	55	1164	365	0.150685
CCCA|CCTG	CCCA	CCTG	62	1164	413	0.150121
CCTG|CGCC	CGCC	CCTG	62	1563	413	0.150121
CCAT|CTCC	CTCC	CCAT	51	978	340	0.15
CAAC|CCCG	CCCG	CAAC	94	1229	627	0.14992
CCTA|CTCC	CTCC	CCTA	55	978	367	0.149864
CCCA|TCGC	CCCA	TCGC	69	1164	461	0.149675
AACC|CCCG	CCCG	AACC	70	1229	468	0.149573
CCCT|CCTC	CCCT	CCTC	175	1060	1170	0.149573
CACG|CCCT	CCCT	CACG	113	1060	756	0.149471
CTCC|CTGC	CTCC	CTGC	59	978	395	0.149367
CTCA|CTCC	CTCC	CTCA	69	978	462	0.149351
CCCG|CGTC	CCCG	CGTC	66	1229	442	0.149321
CACC|CCCT	CCCT	CACC	238	1060	1597	0.149029
CCCA|CGAC	CCCA	CGAC	102	1164	686	0.148688
CCTC|TCCA	CCTC	TCCA	52	1170	350	0.148571
CTCC|TCCA	CTCC	TCCA	52	978	350	0.148571
CTCC|TCCC	TCCC	CTCC	145	819	978	0.148262
ACAC|GAGG	ACAC	GAGG	109	841	736	0.148098
CCCG|GCCC	CCCG	GCCC	195	1229	1318	0.147951
CCCA|CTCC	CTCC	CCCA	172	978	1164	0.147766
AGCC|CCTC	CCTC	AGCC	57	1170	386	0.147668
ACAC|GGAG	ACAC	GGAG	95	841	644	0.147516
CCGA|CCTC	CCTC	CCGA	74	1170	502	0.14741
CCCT|GGCC	CCCT	GGCC	63	1060	428	0.147196
CCGC|GGCC	CCGC	GGCC	63	1504	428	0.147196
CCCT|CTCA	CCCT	CTCA	68	1060	462	0.147186
CCAT|CCCA	CCCA	CCAT	50	1164	340	0.147059
ACGA|CCCC	CCCC	ACGA	53	2178	361	0.146814
CCCT|CCGT	CCCT	CCGT	63	1060	430	0.146512
CCGC|GCGC	CCGC	GCGC	95	1504	649	0.146379
CACA|CCCG	CCCG	CACA	103	1229	704	0.146307
CCTC|CGCT	CCTC	CGCT	67	1170	458	0.146288
ACAC|CCGC	CCGC	ACAC	123	1504	841	0.146254
GCCC|GCCG	GCCC	GCCG	80	1318	547	0.146252
ACCC|ACGC	ACCC	ACGC	115	1231	789	0.145754
ACCC|CTAC	ACCC	CTAC	60	1231	412	0.145631
ACTC|CCCA	CCCA	ACTC	62	1164	426	0.14554
ACCA|CCCA	CCCA	ACCA	88	1164	605	0.145455
ACCC|CGCA	ACCC	CGCA	98	1231	674	0.145401
AACC|CCCA	CCCA	AACC	68	1164	468	0.145299
CGCC|GACA	CGCC	GACA	51	1563	352	0.144886
ACGC|CCCA	CCCA	ACGC	114	1164	789	0.144487
CCCT|GCTC	CCCT	GCTC	56	1060	388	0.14433
ACCC|CGCT	ACCC	CGCT	66	1231	458	0.144105
ACGA|CCCG	CCCG	ACGA	52	1229	361	0.144044
ACCC|CCAA	ACCC	CCAA	64	1231	445	0.14382
CCAA|GCCC	GCCC	CCAA	64	1318	445	0.14382
CCTC|CTCC	CTCC	CCTC	168	978	1170	0.14359
ACCC|ACTC	ACCC	ACTC	61	1231	426	0.143192
CCGC|CTCC	CTCC	CCGC	215	978	1504	0.142952
ACCC|CGAC	ACCC	CGAC	98	1231	686	0.142857
CCCG|CTCA	CCCG	CTCA	66	1229	462	0.142857
CCCT|TCCA	CCCT	TCCA	50	1060	350	0.142857
CCTG|CTCC	CTCC	CCTG	59	978	413	0.142857
ACAC|CCCG	CCCG	ACAC	120	1229	841	0.142687
CCAC|CTCC	CTCC	CCAC	232	978	1628	0.142506
CTCC|TGCC	CTCC	TGCC	53	978	373	0.142091
AGGA|GACA	AGGA	GACA	50	718	352	0.142045
CACA|GCCC	GCCC	CACA	100	1318	704	0.142045
ACGC|CCTC	CCTC	ACGC	112	1170	789	0.141952
CCAC|CCCA	CCCA	CCAC	231	1164	1628	0.141892
CTGC|TCCC	TCCC	CTGC	56	819	395	0.141772
CCAA|CCTC	CCTC	CCAA	63	1170	445	0.141573
CACG|CCTC	CCTC	CACG	107	1170	756	0.141534
ACCC|CCGA	ACCC	CCGA	71	1231	502	0.141434
CCTC|CGAC	CCTC	CGAC	97	1170	686	0.141399
ACCC|CTCG	ACCC	CTCG	65	1231	460	0.141304
ACGA|CCGC	CCGC	ACGA	51	1504	361	0.141274
GACG|GCCC	GCCC	GACG	54	1318	383	0.140992
CCCC|CCGC	CCGC	CCCC	307	1504	2178	0.140955
CTCC|GCCA	CTCC	GCCA	84	978	596	0.14094
CATC|CTCC	CTCC	CATC	59	978	419	0.140811
ACGC|CCCG	CCCG	ACGC	111	1229	789	0.140684
ACAC|ACCC	ACCC	ACAC	118	1231	841	0.140309
ACCC|CGTC	ACCC	CGTC	62	1231	442	0.140271
CCCA|CGTC	CCCA	CGTC	62	1164	442	0.140271
CCTC|CGGC	CCTC	CGGC	65	1170	464	0.140086
ACCC|AGCC	ACCC	AGCC	54	1231	386	0.139896
CCCG|CCGT	CCCG	CCGT	60	1229	430	0.139535
CCAA|CCCA	CCCA	CCAA	62	1164	445	0.139326
GACA|GAGG	GAGG	GACA	49	736	352	0.139205
CTCC|TCCG	CTCC	TCCG	52	978	374	0.139037
AACC|CCTC	CCTC	AACC	65	1170	468	0.138889
CCAC|GGAC	CCAC	GGAC	48	1628	346	0.138728
CATC|TCCC	TCCC	CATC	58	819	419	0.138425
ACCT|TCCC	TCCC	ACCT	66	819	477	0.138365
AACA|CCAC	CCAC	AACA	48	1628	347	0.138329
CCAT|CCTC	CCTC	CCAT	47	1170	340	0.138235
CCCA|GCAC	CCCA	GCAC	90	1164	653	0.137825
AGCC|CTCC	CTCC	AGCC	53	978	386	0.137306
ACCA|CTCC	CTCC	ACCA	83	978	605	0.13719
CCCA|GACC	CCCA	GACC	79	1164	576	0.137153
GTCC|TCCC	TCCC	GTCC	48	819	350	0.137143
CACC|CTCC	CTCC	CACC	219	978	1597	0.137132
CCTC|CTCG	CCTC	CTCG	63	1170	460	0.136957
ACAC|CCAC	CCAC	ACAC	115	1628	841	0.136742
CCCA|TCCG	CCCA	TCCG	51	1164	374	0.136364
TCCC|TCCG	TCCC	TCCG	51	819	374	0.136364
CCTA|CCTC	CCTC	CCTA	50	1170	367	0.13624
CCCC|GCCC	GCCC	CCCC	296	1318	2178	0.135904
CCCT|CGGC	CCCT	CGGC	63	1060	464	0.135776
CCTG|TCCC	TCCC	CCTG	56	819	413	0.135593
CCCT|TCAC	CCCT	TCAC	69	1060	509	0.13556
ACCA|CCCT	CCCT	ACCA	82	1060	605	0.135537
CACT|CCTC	CCTC	CACT	62	1170	458	0.135371
ACCG|CCCT	CCCT	ACCG	87	1060	643	0.135303
CCTC|CGCA	CCTC	CGCA	91	1170	674	0.135015
CCCA|CCGT	CCCA	CCGT	58	1164	430	0.134884
ACCC|CCCT	CCCT	ACCC	166	1060	1231	0.13485
CAGC|CTCC	CTCC	CAGC	47	978	349	0.13467
ACTC|CCCT	CCCT	ACTC	57	1060	426	0.133803
ACTC|TCCC	TCCC	ACTC	57	819	426	0.133803
ACCC|CACA	ACCC	CACA	94	1231	704	0.133523
CACC|GACA	CACC	GACA	47	1597	352	0.133523
CCGC|GACA	CCGC	GACA	47	1504	352	0.133523
CCTA|TCCC	TCCC	CCTA	49	819	367	0.133515
CTAC|CTCC	CTCC	CTAC	55	978	412	0.133495
CCCT|CCGA	CCCT	CCGA	67	1060	502	0.133466
CTCC|GCCG	CTCC	GCCG	73	978	547	0.133455
CCTC|TCCC	TCCC	CCTC	156	819	1170	0.133333
CACT|CCCA	CCCA	CACT	61	1164	458	0.133188
CACT|CTCC	CTCC	CACT	61	978	458	0.133188
CACT|GCCC	GCCC	CACT	61	1318	458	0.133188
CTCC|CTCG	CTCC	CTCG	61	978	460	0.132609
CCGT|CTCC	CTCC	CCGT	57	978	430	0.132558
ACCC|CCCC	ACCC	CCCC	287	1231	2178	0.131772
CTCC|TCAC	CTCC	TCAC	67	978	509	0.131631
CCCT|CCGG	CCCT	CCGG	48	1060	365	0.131507
CCGA|CTCC	CTCC	CCGA	66	978	502	0.131474
ACCC|TGCC	ACCC	TGCC	49	1231	373	0.131367
CCCT|TGCC	CCCT	TGCC	49	1060	373	0.131367
CCCC|CCTC	CCTC	CCCC	286	1170	2178	0.131313
ACCC|CGCG	ACCC	CGCG	96	1231	732	0.131148
CACT|CCCT	CCCT	CACT	60	1060	458	0.131004
CCCT|CGCT	CCCT	CGCT	60	1060	458	0.131004
CGCC|TCCC	TCCC	CGCC	204	819	1563	0.130518
ACGA|CCAC	CCAC	ACGA	47	1628	361	0.130194
ACGA|CGCC	CGCC	ACGA	47	1563	361	0.130194
CCTC|GCAC	CCTC	GCAC	85	1170	653	0.130168
CTCC|TCGC	CTCC	TCGC	60	978	461	0.130152
ACAC|GAGG	GAGG	ACAC	109	736	841	0.129608
AGCC|CCCG	CCCG	AGCC	50	1229	386	0.129534
ACCC|GCGC	ACCC	GCGC	84	1231	649	0.12943
CACA|CCTC	CCTC	CACA	91	1170	704	0.129261
CAAC|CCTC	CCTC	CAAC	81	1170	627	0.129187
CGCG|CGTC	CGCG	CGTC	57	732	442	0.128959
CAGC|CCCT	CCCT	CAGC	45	1060	349	0.12894
CACG|CCGG	CACG	CCGG	47	756	365	0.128767
CCCG|GGCC	CCCG	GGCC	55	1229	428	0.128505
CCCT|CCTA	CCCT	CCTA	47	1060	367	0.128065
CACC|GACG	CACC	GACG	49	1597	383	0.127937
CCCC|GACG	CCCC	GACG	49	2178	383	0.127937
CCGC|GACG	CCGC	GACG	49	1504	383	0.127937
ACCC|CCGT	ACCC	CCGT	55	1231	430	0.127907
CCCG|GCGC	CCCG	GCGC	83	1229	649	0.127889
CCCT|GCGC	CCCT	GCGC	83	1060	649	0.127889
GCCC|TCCC	TCCC	GCCC	168	819	1318	0.127466
CCCG|CGCG	CCCG	CGCG	93	1229	732	0.127049
CCAT|CGCG	CGCG	CCAT	43	732	340	0.126471
CTCC|GCTC	CTCC	GCTC	49	978	388	0.126289
ACAC|CCTG	ACAC	CCTG	52	841	413	0.125908
AACA|GGAG	AACA	GGAG	81	347	644	0.125776
CCTC|CGCG	CCTC	CGCG	92	1170	732	0.125683
CGCC|GACG	CGCC	GACG	48	1563	383	0.125326
ACCC|TCCC	TCCC	ACCC	154	819	1231	0.125102
ACAC|CCCA	CCCA	ACAC	105	1164	841	0.124851
CAAC|GAGG	GAGG	CAAC	78	736	627	0.124402
CACG|CTCG	CACG	CTCG	57	756	460	0.123913
CCCA|CCCC	CCCA	CCCC	269	1164	2178	0.123508
TCCC|TGCC	TCCC	TGCC	46	819	373	0.123324
CCCT|TCCC	TCCC	CCCT	130	819	1060	0.122642
AGCC|CCCT	CCCT	AGCC	47	1060	386	0.121762
CACG|TCGC	CACG	TCGC	56	756	461	0.121475
TCCC|TCGC	TCCC	TCGC	56	819	461	0.121475
CCCT|CTAC	CCCT	CTAC	50	1060	412	0.121359
CCTC|CTAC	CCTC	CTAC	50	1170	412	0.121359
CTCA|TCCC	TCCC	CTCA	56	819	462	0.121212
GCTC|TCCC	TCCC	GCTC	47	819	388	0.121134
AACA|CACC	CACC	AACA	42	1597	347	0.121037
CCAC|TCCC	TCCC	CCAC	197	819	1628	0.121007
GCCG|TCCC	TCCC	GCCG	66	819	547	0.120658
CACC|TCCC	TCCC	CACC	192	819	1597	0.120225
CCCG|GACG	CCCG	GACG	46	1229	383	0.120104
CCTC|GACC	CCTC	GACC	69	1170	576	0.119792
CTCC|GACC	CTCC	GACC	69	978	576	0.119792
ACGC|GAGG	ACGC	GAGG	88	789	736	0.119565
CCGA|CGCA	CGCA	CCGA	60	674	502	0.119522
ACCC|GACA	ACCC	GACA	42	1231	352	0.119318
GCCA|TCCC	TCCC	GCCA	71	819	596	0.119128
ACGA|GAGG	GAGG	ACGA	43	736	361	0.119114
CCAA|CCCT	CCCT	CCAA	53	1060	445	0.119101
CACG|CTCC	CTCC	CACG	90	978	756	0.119048
CCGC|TCCC	TCCC	CCGC	179	819	1504	0.119016
ACAC|CCCT	CCCT	ACAC	100	1060	841	0.118906
CACG|CCTG	CACG	CCTG	49	756	413	0.118644
CCTC|GCGC	CCTC	GCGC	77	1170	649	0.118644
CGGC|GCAC	GCAC	CGGC	55	653	464	0.118534
ACGC|GCCT	ACGC	GCCT	49	789	414	0.118357
CACG|GCCT	CACG	GCCT	49	756	414	0.118357
ACCG|CTCC	CTCC	ACCG	76	978	643	0.118196
AACA|CCCC	CCCC	AACA	41	2178	347	0.118156
AACA|CCGC	CCGC	AACA	41	1504	347	0.118156
CCCC|CCCG	CCCG	CCCC	257	1229	2178	0.117998
ACGC|CCCT	CCCT	ACGC	93	1060	789	0.117871
CCAT|TCCC	TCCC	CCAT	40	819	340	0.117647
ACCC|GACG	ACCC	GACG	45	1231	383	0.117493
CCCT|CGCG	CCCT	CGCG	86	1060	732	0.117486
CTCG|TCCC	TCCC	CTCG	54	819	460	0.117391
ACCC|CCTA	ACCC	CCTA	43	1231	367	0.117166
GCGC|GTCC	GCGC	GTCC	41	649	350	0.117143
CCCT|GCCG	CCCT	GCCG	64	1060	547	0.117002
AACA|GAGG	AACA	GAGG	86	347	736	0.116848
CACG|GGCC	CACG	GGCC	50	756	428	0.116822
CACA|CCCA	CCCA	CACA	82	1164	704	0.116477
CCCG|GACA	CCCG	GACA	41	1229	352	0.116477
CACA|CCCT	CCCT	CACA	82	1060	704	0.116477
CGCA|CGGC	CGCA	CGGC	54	674	464	0.116379
ACCC|ACGA	ACCC	ACGA	42	1231	361	0.116343
ACGA|GCCC	GCCC	ACGA	42	1318	361	0.116343
CCCC|CTCC	CTCC	CCCC	253	978	2178	0.116162
CGAC|GCTC	CGAC	GCTC	45	686	388	0.115979
CGCA|CTCC	CTCC	CGCA	78	978	674	0.115727
ACGC|CGTC	ACGC	CGTC	51	789	442	0.115385
AACC|CTCC	CTCC	AACC	54	978	468	0.115385
CGCC|CGCC	CGCC	CGCC	180	1563	1563	0.115163
CGAC|CTCC	CTCC	CGAC	79	978	686	0.11516
CCGC|CCGC	CCGC	CCGC	173	1504	1504	0.115027
CCCT|GCAC	CCCT	GCAC	75	1060	653	0.114855
CAAC|CCCT	CCCT	CAAC	72	1060	627	0.114833
CACG|CCAA	CACG	CCAA	51	756	445	0.114607
CCAA|CTCC	CTCC	CCAA	51	978	445	0.114607
CTCC|GGCC	CTCC	GGCC	49	978	428	0.114486
ACAC|GTCC	ACAC	GTCC	40	841	350	0.114286
ACGC|GTCC	ACGC	GTCC	40	789	350	0.114286
CACG|CGGC	CACG	CGGC	53	756	464	0.114224
CTAC|TCCC	TCCC	CTAC	47	819	412	0.114078
AGCC|CGCA	CGCA	AGCC	44	674	386	0.11399
AGCC|GCGC	GCGC	AGCC	44	649	386	0.11399
CACC|CACC	CACC	CACC	182	1597	1597	0.113964
ACCC|CCTG	ACCC	CCTG	47	1231	413	0.113801
CGCT|CTCC	CTCC	CGCT	52	978	458	0.113537
CGCA|GCTC	CGCA	GCTC	44	674	388	0.113402
ACGC|GGAG	ACGC	GGAG	73	789	644	0.113354
ACGC|CTCG	ACGC	CTCG	52	789	460	0.113043
ACAC|GGAG	GGAG	ACAC	95	644	841	0.112961
CCCT|GACC	CCCT	GACC	65	1060	576	0.112847
CGCA|GACC	CGCA	GACC	65	674	576	0.112847
CCCT|CGCA	CCCT	CGCA	76	1060	674	0.11276
ACTC|CTCC	CTCC	ACTC	48	978	426	0.112676
ACGC|TGCC	ACGC	TGCC	42	789	373	0.112601
CCCC|CCCT	CCCT	CCCC	245	1060	2178	0.112489
CGAC|GCCA	CGAC	GCCA	67	686	596	0.112416
AACA|ACCC	ACCC	AACA	39	1231	347	0.112392
ACAC|GGCC	ACAC	GGCC	48	841	428	0.11215
ACGC|GGCC	ACGC	GGCC	48	789	428	0.11215
ACCC|ACCC	ACCC	ACCC	138	1231	1231	0.112104
CCAT|GCGC	GCGC	CCAT	38	649	340	0.111765
CAGC|CGAC	CGAC	CAGC	39	686	349	0.111748
CGAC|CTAC	CGAC	CTAC	46	686	412	0.11165
CAAC|CTCC	CTCC	CAAC	70	978	627	0.111643
ACGC|CTCC	CTCC	ACGC	88	978	789	0.111534
ACGC|GAGG	GAGG	ACGC	88	736	789	0.111534
CGCT|TCCC	TCCC	CGCT	51	819	458	0.111354
CTCC|GCCT	CTCC	GCCT	46	978	414	0.111111
GCCT|TCCC	TCCC	GCCT	46	819	414	0.111111
CACG|CGTC	CACG	CGTC	49	756	442	0.11086
CGTC|GCAC	GCAC	CGTC	49	653	442	0.11086
CGTC|GCGC	GCGC	CGTC	49	649	442	0.11086
CACG|CCCA	CACG	CCCA	129	756	1164	0.110825
CCCT|GACA	CCCT	GACA	39	1060	352	0.110795
CCTC|GACA	CCTC	GACA	39	1170	352	0.110795
CTCC|GCAC	CTCC	GCAC	72	978	653	0.11026
ACAC|AGGA	ACAC	AGGA	79	841	718	0.110028
CGCG|TGCC	CGCG	TGCC	41	732	373	0.10992
CGAC|CGGC	CGAC	CGGC	51	686	464	0.109914
ACAC|GGAC	ACAC	GGAC	38	841	346	0.109827
AGGA|GGAC	AGGA	GGAC	38	718	346	0.109827
CATC|CGCG	CGCG	CATC	46	732	419	0.109785
CATC|GCGC	GCGC	CATC	46	649	419	0.109785
CCCA|GACG	CCCA	GACG	42	1164	383	0.109661
GACG|GAGG	GAGG	GACG	42	736	383	0.109661
AACA|ACAC	ACAC	AACA	38	841	347	0.10951
AACA|CCCA	CCCA	AACA	38	1164	347	0.10951
AACA|CGCC	CGCC	AACA	38	1563	347	0.10951
CACT|TCCC	TCCC	CACT	50	819	458	0.10917
ACCT|CACG	CACG	ACCT	52	756	477	0.109015
CCTG|GCGC	GCGC	CCTG	45	649	413	0.108959
CACG|CCAT	CACG	CCAT	37	756	340	0.108824
GCCC|GCCC	GCCC	GCCC	143	1318	1318	0.108498
CACG|GCTC	CACG	GCTC	42	756	388	0.108247
ACCG|CTCA	ACCG	CTCA	50	643	462	0.108225
TCAC|TCCC	TCCC	TCAC	55	819	509	0.108055
ACCA|CGGC	ACCA	CGGC	50	605	464	0.107759
CACG|GACC	CACG	GACC	62	756	576	0.107639
CGAC|GGCC	CGAC	GGCC	46	686	428	0.107477
CCCG|CGAC	CGAC	CCCG	132	686	1229	0.107404
CCCG|TCCC	TCCC	CCCG	132	819	1229	0.107404
CCCA|TCCC	TCCC	CCCA	125	819	1164	0.107388
CGAC|GCAC	CGAC	GCAC	70	686	653	0.107198
GACG|GGAG	GGAG	GACG	41	644	383	0.10705
CACG|CACT	CACG	CACT	49	756	458	0.106987
ACGC|CCGG	ACGC	CCGG	39	789	365	0.106849
CCGG|CGCA	CGCA	CCGG	39	674	365	0.106849
CCGG|CTCC	CTCC	CCGG	39	978	365	0.106849
AACC|CGAC	CGAC	AACC	50	686	468	0.106838
ACGC|CTAC	ACGC	CTAC	44	789	412	0.106796
AACA|AAGG	AAGG	AACA	37	424	347	0.106628
AACA|CCCG	CCCG	AACA	37	1229	347	0.106628
CACG|CCCT	CACG	CCCT	113	756	1060	0.106604
ACCG|CCCG	ACCG	CCCG	131	643	1229	0.106591
CCTG|CGCG	CGCG	CCTG	44	732	413	0.106538
CACA|GAGG	GAGG	CACA	75	736	704	0.106534
CGTC|TCCC	TCCC	CGTC	47	819	442	0.106335
AGCC|TCCC	TCCC	AGCC	41	819	386	0.106218
CAAC|GAGG	CAAC	GAGG	78	627	736	0.105978
CACG|TCCC	TCCC	CACG	80	819	756	0.10582
ACAC|GCAC	ACAC	GCAC	69	841	653	0.105666
ACGC|ACTC	ACGC	ACTC	45	789	426	0.105634
ACGC|CGGC	ACGC	CGGC	49	789	464	0.105603
ACGC|CCGA	ACGC	CCGA	53	789	502	0.105578
ACGA|AGGA	AGGA	ACGA	38	718	361	0.105263
AGGA|CAAC	AGGA	CAAC	66	718	627	0.105263
CACG|CGCT	CACG	CGCT	48	756	458	0.104803
AACC|TCCC	TCCC	AACC	49	819	468	0.104701
ACGC|TCCG	ACGC	TCCG	39	789	374	0.104278
GACC|TCCG	GACC	TCCG	39	576	374	0.104278
ACGC|GACC	ACGC	GACC	60	789	576	0.104167
ACCA|GCAC	GCAC	ACCA	63	653	605	0.104132
CGCG|TCGC	CGCG	TCGC	48	732	461	0.104121
AAGG|ACAC	ACAC	AAGG	44	841	424	0.103774
ACCG|AGCC	ACCG	AGCC	40	643	386	0.103627
CACG|CCGA	CACG	CCGA	52	756	502	0.103586
CACA|CCTA	CACA	CCTA	38	704	367	0.103542
CCTA|GCAC	GCAC	CCTA	38	653	367	0.103542
CCCT|CGAC	CCCT	CGAC	71	1060	686	0.103499
ACAC|CCTC	CCTC	ACAC	87	1170	841	0.103448
ACTC|CACG	CACG	ACTC	44	756	426	0.103286
ACGC|GCTC	ACGC	GCTC	40	789	388	0.103093
CCCA|CGCA	CGCA	CCCA	120	674	1164	0.103093
CGCG|GTCC	CGCG	GTCC	36	732	350	0.102857
CCCA|GGCC	CCCA	GGCC	44	1164	428	0.102804
ACCG|CACG	CACG	ACCG	66	756	643	0.102644
CATC|CCCT	CCCT	CATC	43	1060	419	0.102625
CACT|CGCA	CGCA	CACT	47	674	458	0.10262
CCTC|CCTC	CCTC	CCTC	120	1170	1170	0.102564
AACC|GAGG	GAGG	AACC	48	736	468	0.102564
ACGA|CCCA	CCCA	ACGA	37	1164	361	0.102493
GACC|GCAC	GCAC	GACC	59	653	576	0.102431
CCGT|TCCC	TCCC	CCGT	44	819	430	0.102326
CCCA|GACA	CCCA	GACA	36	1164	352	0.102273
CGAC|GCAC	GCAC	CGAC	70	653	686	0.102041
CACG|CTAC	CACG	CTAC	42	756	412	0.101942
CACA|GAGG	CACA	GAGG	75	704	736	0.101902
GCCA|TGCC	GCCA	TGCC	38	596	373	0.101877
GCGC|TGCC	GCGC	TGCC	38	649	373	0.101877
ACAC|CACG	ACAC	CACG	77	841	756	0.101852
CTCC|GCGC	CTCC	GCGC	66	978	649	0.101695
ACCG|CCGA	ACCG	CCGA	51	643	502	0.101594
CTGC|GCCA	GCCA	CTGC	40	596	395	0.101266
CACC|GGAC	CACC	GGAC	35	1597	346	0.101156
CGCC|GGAC	CGCC	GGAC	35	1563	346	0.101156
CACG|CGCG	CACG	CGCG	74	756	732	0.101093
ACCG|ACGC	ACGC	ACCG	65	789	643	0.101089
ACCG|TCCC	TCCC	ACCG	65	819	643	0.101089
AACA|GCCC	GCCC	AACA	35	1318	347	0.100865
ACCA|CCTA	ACCA	CCTA	37	605	367	0.100817
ACCG|CCTA	ACCG	CCTA	37	643	367	0.100817
CACG|CCTA	CACG	CCTA	37	756	367	0.100817
CCAC|CCAC	CCAC	CCAC	164	1628	1628	0.100737
CACG|CGAC	CACG	CGAC	69	756	686	0.100583
ACCG|GCTC	ACCG	GCTC	39	643	388	0.100515
CACA|CGCT	CACA	CGCT	46	704	458	0.100437
GCCA|TCAC	GCCA	TCAC	51	596	509	0.100196
ACCA|TCCA	ACCA	TCCA	35	605	350	0.1
CCGT|CGAC	CGAC	CCGT	43	686	430	0.1
CGAC|TCCA	CGAC	TCCA	35	686	350	0.1
GCGC|TCCA	GCGC	TCCA	35	649	350	0.1
GCGC|TCGC	GCGC	TCGC	46	649	461	0.0997831
CACA|CCGA	CACA	CCGA	50	704	502	0.0996016
ACAC|CGTC	ACAC	CGTC	44	841	442	0.0995475
CGCA|CGTC	CGCA	CGTC	44	674	442	0.0995475
ACCG|CGAC	CGAC	ACCG	64	686	643	0.0995334
CTAC|GCCA	GCCA	CTAC	41	596	412	0.0995146
CACA|CTCC	CTCC	CACA	70	978	704	0.0994318
CGCA|TCCC	TCCC	CGCA	67	819	674	0.0994065
CACG|TGCC	CACG	TGCC	37	756	373	0.0991957
TCAC|TGCC	TCAC	TGCC	37	509	373	0.0991957
ACCA|TCCC	TCCC	ACCA	60	819	605	0.0991736
ACAC|CGGC	ACAC	CGGC	46	841	464	0.0991379
ACCG|CGGC	ACCG	CGGC	46	643	464	0.0991379
ACGC|CGAC	ACGC	CGAC	68	789	686	0.0991254
ACCC|ACCG	ACCG	ACCC	122	643	1231	0.0991064
CGCG|GCCT	CGCG	GCCT	41	732	414	0.0990338
ACGC|CAAC	ACGC	CAAC	62	789	627	0.0988836
ACGC|TCCC	TCCC	ACGC	78	819	789	0.0988593
CCCA|CGCG	CGCG	CCCA	115	732	1164	0.0987973
ACCG|CCGG	ACCG	CCGG	36	643	365	0.0986301
CCGG|GCAC	GCAC	CCGG	36	653	365	0.0986301
CACG|CGCC	CACG	CGCC	154	756	1563	0.0985285
CGAC|CGCC	CGAC	CGCC	154	686	1563	0.0985285
ACGC|CCTA	ACGC	CCTA	36	789	367	0.0980926
AACA|ACGC	ACGC	AACA	34	789	347	0.0979827
ACGC|CCCA	ACGC	CCCA	114	789	1164	0.0979381
GCAC|GCTC	GCAC	GCTC	38	653	388	0.0979381
CGAC|CGCA	CGAC	CGCA	66	686	674	0.0979228
CACG|CGCG	CGCG	CACG	74	732	756	0.0978836
ACAC|GCCC	ACAC	GCCC	129	841	1318	0.0978756
CACG|TCCC	CACG	TCCC	80	756	819	0.0976801
CACG|CCGT	CACG	CCGT	42	756	430	0.0976744
CCGT|GCAC	GCAC	CCGT	42	653	430	0.0976744
CGAC|GCCA	GCCA	CGAC	67	596	686	0.0976676
ACAC|CCCG	ACAC	CCCG	120	841	1229	0.0976404
ACAC|CCGA	ACAC	CCGA	49	841	502	0.0976096
CCGA|CGCG	CGCG	CCGA	49	732	502	0.0976096
CCGA|GCCA	GCCA	CCGA	49	596	502	0.0976096
ACCC|CACG	CACG	ACCC	120	756	1231	0.0974817
ACCG|CAGC	ACCG	CAGC	34	643	349	0.0974212
CAGC|CGCA	CGCA	CAGC	34	674	349	0.0974212
CCCT|GCCA	GCCA	CCCT	103	596	1060	0.0971698
GCCG|TCCA	GCCG	TCCA	34	547	350	0.0971429
ACGC|GCCC	ACGC	GCCC	128	789	1318	0.0971168
CACG|GCCC	CACG	GCCC	128	756	1318	0.0971168
ACGC|CGCG	ACGC	CGCG	71	789	732	0.0969945
ACGA|CCTC	CCTC	ACGA	35	1170	361	0.0969529
ACGA|GGCC	GGCC	ACGA	35	428	361	0.0969529
CACG|GCCG	CACG	GCCG	53	756	547	0.0968921
ACGC|CCTG	ACGC	CCTG	40	789	413	0.0968523
CACG|CCCG	CACG	CCCG	119	756	1229	0.0968267
ACGC|CCAA	ACGC	CCAA	43	789	445	0.0966292
CCAA|CGAC	CGAC	CCAA	43	686	445	0.0966292
CCAA|GAGG	GAGG	CCAA	43	736	445	0.0966292
ACAC|GCCT	ACAC	GCCT	40	841	414	0.0966184
CGAC|GCCT	CGAC	GCCT	40	686	414	0.0966184
CCTC|GACG	CCTC	GACG	37	1170	383	0.0966057
ACCA|GCAC	ACCA	GCAC	63	605	653	0.0964778
CGCA|GACC	GACC	CGCA	65	576	674	0.0964392
ACCG|CGCA	CGCA	ACCG	62	674	643	0.096423
ACAC|TCCG	ACAC	TCCG	36	841	374	0.0962567
CACA|TCCG	CACA	TCCG	36	704	374	0.0962567
GCCA|TCCG	GCCA	TCCG	36	596	374	0.0962567
CGAC|CGCA	CGCA	CGAC	66	674	686	0.0962099
ACGC|CTGC	ACGC	CTGC	38	789	395	0.0962025
CGCG|CTGC	CGCG	CTGC	38	732	395	0.0962025
AACC|CCCT	CCCT	AACC	45	1060	468	0.0961538
CACT|GCAC	GCAC	CACT	44	653	458	0.0960699
CCCC|CCCC	CCCC	CCCC	209	2178	2178	0.0959596
CCGG|GACC	GACC	CCGG	35	576	365	0.0958904
ACCA|CACG	CACG	ACCA	58	756	605	0.0958678
ACAC|ACCC	ACAC	ACCC	118	841	1231	0.095857
AGCC|CGCG	CGCG	AGCC	37	732	386	0.0958549
CACA|GGCC	CACA	GGCC	41	704	428	0.0957944
CGCA|GGCC	CGCA	GGCC	41	674	428	0.0957944
ACGC|CCTC	ACGC	CCTC	112	789	1170	0.0957265
GACC|GCCA	GCCA	GACC	55	596	576	0.0954861
ACAC|GCTC	ACAC	GCTC	37	841	388	0.0953608
ACAC|CCGT	ACAC	CCGT	41	841	430	0.0953488
ACCT|CCGT	ACCT	CCGT	41	477	430	0.0953488
ACGC|TCCC	ACGC	TCCC	78	789	819	0.0952381
CGCA|GCCG	CGCA	GCCG	52	674	547	0.095064
CACA|CGTC	CACA	CGTC	42	704	442	0.0950226
GCAC|TCCC	TCCC	GCAC	62	819	653	0.0949464
ACCG|GCAC	GCAC	ACCG	61	653	643	0.0948678
CGAC|GCCC	CGAC	GCCC	125	686	1318	0.0948407
CGGC|GCCG	GCCG	CGGC	44	547	464	0.0948276
CGGC|TCCC	TCCC	CGGC	44	819	464	0.0948276
ACCG|CCCA	ACCG	CCCA	110	643	1164	0.0945017
CCCA|GCGC	GCGC	CCCA	110	649	1164	0.0945017
CACG|CCGC	CACG	CCGC	142	756	1504	0.0944149
ACAC|CCCT	ACAC	CCCT	100	841	1060	0.0943396
AAGG|AGGA	AGGA	AAGG	40	718	424	0.0943396
GACC|GTCC	GACC	GTCC	33	576	350	0.0942857
ACAC|ACCA	ACAC	ACCA	57	841	605	0.0942149
ACCG|GCCT	ACCG	GCCT	39	643	414	0.0942029
CCAT|GCCA	GCCA	CCAT	32	596	340	0.0941176
CACG|GACG	CACG	GACG	36	756	383	0.0939948
GCGC|TCCC	TCCC	GCGC	61	819	649	0.0939908
ACAC|AGGA	AGGA	ACAC	79	718	841	0.0939358
ACAC|CTCC	CTCC	ACAC	79	978	841	0.0939358
ACTC|GCAC	GCAC	ACTC	40	653	426	0.0938967
ACCG|CGCT	ACCG	CGCT	43	643	458	0.0938865
CACA|CACT	CACA	CACT	43	704	458	0.0938865
ACAC|CTGC	ACAC	CTGC	37	841	395	0.0936709
CCGA|GCAC	GCAC	CCGA	47	653	502	0.0936255
CCGA|GCGC	GCGC	CCGA	47	649	502	0.0936255
CGCA|TCCG	CGCA	TCCG	35	674	374	0.0935829
GCGC|TCCG	GCGC	TCCG	35	649	374	0.0935829
CGCA|CGCG	CGCG	CGCA	63	732	674	0.0934718
ACCA|ACCC	ACCA	ACCC	115	605	1231	0.09342
ACCC|ACGC	ACGC	ACCC	115	789	1231	0.09342
ACCG|GCAC	ACCG	GCAC	61	643	653	0.093415
CCCT|CCCT	CCCT	CCCT	99	1060	1060	0.0933962
AACA|AGGA	AACA	AGGA	67	347	718	0.0933148
ACCG|CGAC	ACCG	CGAC	64	643	686	0.0932945
CGAC|TCCC	TCCC	CGAC	64	819	686	0.0932945
GCCA|TCGC	GCCA	TCGC	43	596	461	0.0932755
AGCC|GCCG	GCCG	AGCC	36	547	386	0.0932642
ACCG|GCCG	ACCG	GCCG	51	643	547	0.0932358
ACGC|GCCG	ACGC	GCCG	51	789	547	0.0932358
CACA|GGAG	CACA	GGAG	60	704	644	0.0931677
ACCG|CCGC	ACCG	CCGC	140	643	1504	0.0930851
CCGC|CGAC	CGAC	CCGC	140	686	1504	0.0930851
ACAC|CATC	ACAC	CATC	39	841	419	0.0930788
ACGC|CATC	ACGC	CATC	39	789	419	0.0930788
CCGT|CGCG	CGCG	CCGT	40	732	430	0.0930233
CCGT|GCCA	GCCA	CCGT	40	596	430	0.0930233
CCGT|GCGC	GCGC	CCGT	40	649	430	0.0930233
GACC|GCTC	GACC	GCTC	36	576	388	0.0927835
GCCG|GCTC	GCCG	GCTC	36	547	388	0.0927835
CGAC|CGTC	CGAC	CGTC	41	686	442	0.0927602
CAAC|CCTA	CAAC	CCTA	34	627	367	0.0926431
CCTA|CGAC	CGAC	CCTA	34	686	367	0.0926431
CCTA|GCCA	GCCA	CCTA	34	596	367	0.0926431
ACCG|GCCC	ACCG	GCCC	122	643	1318	0.0925645
ACGC|GGAG	GGAG	ACGC	73	644	789	0.0925222
ACGC|GGAC	ACGC	GGAC	32	789	346	0.0924855
CACA|GGAC	CACA	GGAC	32	704	346	0.0924855
GACC|GCCA	GACC	GCCA	55	576	596	0.0922819
ACCT|CAAC	CAAC	ACCT	44	627	477	0.0922432
ACCG|CTAC	ACCG	CTAC	38	643	412	0.092233
CACA|CTAC	CACA	CTAC	38	704	412	0.092233
AACA|CCCT	CCCT	AACA	32	1060	347	0.092219
ACAC|CCAA	ACAC	CCAA	41	841	445	0.0921348
CACG|CTCC	CACG	CTCC	90	756	978	0.0920245
CACA|CCTG	CACA	CCTG	38	704	413	0.0920097
CCTG|CTCG	CTCG	CCTG	38	460	413	0.0920097
CCTG|GCCA	GCCA	CCTG	38	596	413	0.0920097
ACCG|CGCA	ACCG	CGCA	62	643	674	0.0919881
AGGA|CAAC	CAAC	AGGA	66	627	718	0.091922
CGCG|GCAC	CGCG	GCAC	60	732	653	0.0918836
AACC|CAAC	CAAC	AACC	43	627	468	0.0918803
CAAC|GCCT	CAAC	GCCT	38	627	414	0.0917874
ACCG|CGCG	CGCG	ACCG	59	732	643	0.0917574
CGCT|GACC	GACC	CGCT	42	576	458	0.0917031
CACT|GAGG	GAGG	CACT	42	736	458	0.0917031
ACAC|CACG	CACG	ACAC	77	756	841	0.0915577
CACG|CCTC	CACG	CCTC	107	756	1170	0.091453
ACCG|GTCC	ACCG	GTCC	32	643	350	0.0914286
CACC|CACG	CACG	CACC	146	756	1597	0.0914214
CACA|GACG	CACA	GACG	35	704	383	0.0913838
CGCA|CTCG	CGCA	CTCG	42	674	460	0.0913043
CGCG|CTCG	CGCG	CTCG	42	732	460	0.0913043
CACG|CGAC	CGAC	CACG	69	686	756	0.0912698
ACAC|CCAT	ACAC	CCAT	31	841	340	0.0911765
ACCG|CCAT	ACCG	CCAT	31	643	340	0.0911765
ACGC|CCAT	ACGC	CCAT	31	789	340	0.0911765
ACCG|TGCC	ACCG	TGCC	34	643	373	0.0911528
CGCT|TGCC	CGCT	TGCC	34	458	373	0.0911528
GACC|GGCC	GACC	GGCC	39	576	428	0.0911215
CGCA|TCGC	CGCA	TCGC	42	674	461	0.0911063
CGCG|GCCC	CGCG	GCCC	120	732	1318	0.091047
ACCA|ACGC	ACGC	ACCA	55	789	605	0.0909091
ACGC|CCAC	ACGC	CCAC	148	789	1628	0.0909091
CACG|TCCG	CACG	TCCG	34	756	374	0.0909091
CGCG|CTCA	CGCG	CTCA	42	732	462	0.0909091
GACA|GCCC	GCCC	GACA	32	1318	352	0.0909091
CAAC|GGAG	GGAG	CAAC	57	644	627	0.0909091
ACAC|CGCC	ACAC	CGCC	142	841	1563	0.0908509
ACGC|AGCC	ACGC	AGCC	35	789	386	0.0906736
GACC|GCAC	GACC	GCAC	59	576	653	0.0903522
ACGC|CCCG	ACGC	CCCG	111	789	1229	0.0903173
CCCG|CGCA	CGCA	CCCG	111	674	1229	0.0903173
CACG|CCAC	CACG	CCAC	147	756	1628	0.0902948
GCCA|GCCC	GCCA	GCCC	119	596	1318	0.0902883
GCCC|GCGC	GCGC	GCCC	119	649	1318	0.0902883
GACC|TCCC	TCCC	GACC	52	819	576	0.0902778
ACAC|CCCA	ACAC	CCCA	105	841	1164	0.0902062
CGCG|GCTC	CGCG	GCTC	35	732	388	0.0902062
ACCG|GCGC	GCGC	ACCG	58	649	643	0.0902022
ACGC|CGCG	CGCG	ACGC	71	732	789	0.0899873
ACGC|CTCC	ACGC	CTCC	88	789	978	0.0899796
CTCC|CTCC	CTCC	CTCC	88	978	978	0.0899796
ACAC|CCTA	ACAC	CCTA	33	841	367	0.0899183
CCTA|CGCA	CGCA	CCTA	33	674	367	0.0899183
CTAC|GCAC	GCAC	CTAC	37	653	412	0.0898058
AACC|ACGC	ACGC	AACC	42	789	468	0.0897436
AACC|GACC	GACC	AACC	42	576	468	0.0897436
CCTC|GCCA	GCCA	CCTC	105	596	1170	0.0897436
AACC|TCAC	TCAC	AACC	42	509	468	0.0897436
CACT|CCGA	CCGA	CACT	41	502	458	0.0895197
CGAC|CGCT	CGAC	CGCT	41	686	458	0.0895197
CGCG|CGCT	CGCG	CGCT	41	732	458	0.0895197
AGGA|CACA	AGGA	CACA	63	718	704	0.0894886
ACCA|GCCT	ACCA	GCCT	37	605	414	0.089372
ACCG|GCGC	ACCG	GCGC	58	643	649	0.0893683
CAAC|CACG	CACG	CAAC	56	756	627	0.0893142
ACTC|GCCA	GCCA	ACTC	38	596	426	0.0892019
CGAC|CTCG	CGAC	CTCG	41	686	460	0.0891304
CTCG|GCCA	GCCA	CTCG	41	596	460	0.0891304
CCCC|TCCC	TCCC	CCCC	194	819	2178	0.0890725
CCGA|CGCA	CCGA	CGCA	60	502	674	0.0890208
CACA|GCCA	CACA	GCCA	53	704	596	0.0889262
CAGC|GCGC	GCGC	CAGC	31	649	349	0.0888252
ACCG|GGCC	ACCG	GGCC	38	643	428	0.088785
GGCC|TCCC	TCCC	GGCC	38	819	428	0.088785
ACAC|GACG	ACAC	GACG	34	841	383	0.0887728
ACAC|CTCA	ACAC	CTCA	41	841	462	0.0887446
ACGA|CGAC	CGAC	ACGA	32	686	361	0.0886427
CAAC|TCCA	CAAC	TCCA	31	627	350	0.0885714
CACA|GTCC	CACA	GTCC	31	704	350	0.0885714
CGAC|GTCC	CGAC	GTCC	31	686	350	0.0885714
CGCT|TCCA	CGCT	TCCA	31	458	350	0.0885714
ACCC|TCAC	TCAC	ACCC	109	509	1231	0.0885459
ACCG|GACC	ACCG	GACC	51	643	576	0.0885417
CAAC|GGAG	CAAC	GGAG	57	627	644	0.0885093
GACC|TGCC	GACC	TGCC	33	576	373	0.0884718
CGAC|TCAC	CGAC	TCAC	45	686	509	0.0884086
CCGT|CGCA	CGCA	CCGT	38	674	430	0.0883721
CGCG|CGGC	CGCG	CGGC	41	732	464	0.0883621
CACG|CATC	CACG	CATC	37	756	419	0.0883055
CGCG|TCCG	CGCG	TCCG	33	732	374	0.0882353
GCCG|TCCG	GCCG	TCCG	33	547	374	0.0882353
AGCC|CACA	CACA	AGCC	34	704	386	0.0880829
AGCC|CGAC	CGAC	AGCC	34	686	386	0.0880829
ACAC|GACA	ACAC	GACA	31	841	352	0.0880682
ACCG|ACCT	ACCG	ACCT	42	643	477	0.0880503
ACCT|CGCA	CGCA	ACCT	42	674	477	0.0880503
CCCG|CCCG	CCCG	CCCG	108	1229	1229	0.0878763
ACAC|GCGC	ACAC	GCGC	57	841	649	0.0878274
CGAC|GCCG	CGAC	GCCG	48	686	547	0.0877514
AGGA|CACA	CACA	AGGA	63	704	718	0.0877437
ACGC|CCCT	ACGC	CCCT	93	789	1060	0.0877358
ACAC|CAAC	ACAC	CAAC	55	841	627	0.0877193
CCGA|CCGG	CCGA	CCGG	32	502	365	0.0876712
CCGG|CGAC	CGAC	CCGG	32	686	365	0.0876712
CCGG|TCCC	TCCC	CCGG	32	819	365	0.0876712
ACGC|CACC	ACGC	CACC	140	789	1597	0.0876644
CCGA|TCCC	TCCC	CCGA	44	819	502	0.0876494
CCGA|GCTC	CCGA	GCTC	34	502	388	0.0876289
CCCA|CGAC	CGAC	CCCA	102	686	1164	0.0876289
AACC|ACAC	ACAC	AACC	41	841	468	0.0876068
CACA|CGAC	CACA	CGAC	60	704	686	0.0874636
ACAC|ACGC	ACAC	ACGC	69	841	789	0.0874525
CGCG|CTCC	CTCC	CGCG	64	978	732	0.0874317
ACAC|CACT	ACAC	CACT	40	841	458	0.0873362
ACGC|CGCT	ACGC	CGCT	40	789	458	0.0873362
CACT|TCAC	TCAC	CACT	40	509	458	0.0873362
ACCG|CACG	ACCG	CACG	66	643	756	0.0873016
AACA|AAGG	AACA	AAGG	37	347	424	0.0872642
CCCG|GCAC	GCAC	CCCG	107	653	1229	0.0870627
GCCT|TCAC	TCAC	GCCT	36	509	414	0.0869565
ACCG|ACTC	ACCG	ACTC	37	643	426	0.0868545
ACAC|GACC	ACAC	GACC	50	841	576	0.0868056
CAAC|GACC	CAAC	GACC	50	627	576	0.0868056
CACA|GACC	CACA	GACC	50	704	576	0.0868056
ACAC|TCGC	ACAC	TCGC	40	841	461	0.0867679
AACA|GGAC	AACA	GGAC	30	347	346	0.0867052
ACCC|GGAC	ACCC	GGAC	30	1231	346	0.0867052
CCCC|GGAC	CCCC	GGAC	30	2178	346	0.0867052
GCCA|TCCC	GCCA	TCCC	71	596	819	0.0866911
CCAC|CGAC	CGAC	CCAC	141	686	1628	0.0866093
CACA|CTCA	CACA	CTCA	40	704	462	0.0865801
AACA|GGAC	GGAC	AACA	30	346	347	0.0864553
CACG|TCAC	CACG	TCAC	44	756	509	0.086444
ACGC|CGAC	CGAC	ACGC	68	686	789	0.086185
CAAC|TCCC	TCCC	CAAC	54	819	627	0.0861244
ACCC|GCCA	GCCA	ACCC	106	596	1231	0.0861089
CACG|CTGC	CACG	CTGC	34	756	395	0.0860759
CGAC|CTGC	CGAC	CTGC	34	686	395	0.0860759
CGCA|CGCG	CGCA	CGCG	63	674	732	0.0860656
ACCG|CCAC	ACCG	CCAC	140	643	1628	0.0859951
CCAC|CGCA	CGCA	CCAC	140	674	1628	0.0859951
CAGC|CGCG	CGCG	CAGC	30	732	349	0.0859599
CAGC|GACC	GACC	CAGC	30	576	349	0.0859599
CAGC|TCCC	TCCC	CAGC	30	819	349	0.0859599
ACCT|CACA	CACA	ACCT	41	704	477	0.0859539
ACCT|CCGT	CCGT	ACCT	41	430	477	0.0859539
CGCG|GCCG	CGCG	GCCG	47	732	547	0.0859232
CATC|GCCG	GCCG	CATC	36	547	419	0.0859189
CTCC|GCCA	GCCA	CTCC	84	596	978	0.0858896
ACGA|GGAG	GGAG	ACGA	31	644	361	0.0858726
CACC|CGCA	CGCA	CACC	137	674	1597	0.0857858
CTCG|GTCC	CTCG	GTCC	30	460	350	0.0857143
TCCA|TCGC	TCGC	TCCA	30	461	350	0.0857143
CCGA|GCCG	GCCG	CCGA	43	547	502	0.0856574
ACGC|GCCA	ACGC	GCCA	51	789	596	0.0855705
GCCA|TCAC	TCAC	GCCA	51	509	596	0.0855705
ACAC|AGCC	ACAC	AGCC	33	841	386	0.0854922
ACAC|TCCC	ACAC	TCCC	70	841	819	0.0854701
GACA|GGAG	GACA	GGAG	55	352	644	0.0854037
ACCC|GCAC	GCAC	ACCC	105	653	1231	0.0852965
CACA|CGAC	CGAC	CACA	60	686	704	0.0852273
CACA|GGAG	GGAG	CACA	60	644	704	0.0852273
CACC|GCAC	GCAC	CACC	136	653	1597	0.0851597
ACCA|CGCT	ACCA	CGCT	39	605	458	0.0851528
CGAC|GACC	CGAC	GACC	49	686	576	0.0850694
CAAC|CCCA	CAAC	CCCA	99	627	1164	0.0850515
CCCA|GCCA	GCCA	CCCA	99	596	1164	0.0850515
ACCA|CTAC	ACCA	CTAC	35	605	412	0.0849515
ACCA|CCGG	ACCA	CCGG	31	605	365	0.0849315
CCGG|GCCA	GCCA	CCGG	31	596	365	0.0849315
ACCA|CTCC	ACCA	CTCC	83	605	978	0.0848671
CAAC|CTCG	CAAC	CTCG	39	627	460	0.0847826
ACCA|CCTG	ACCA	CCTG	35	605	413	0.0847458
CCTG|CGCA	CGCA	CCTG	35	674	413	0.0847458
ACGC|CACG	ACGC	CACG	64	789	756	0.0846561
CCCG|GACC	GACC	CCCG	104	576	1229	0.0846216
ACCG|CCTC	ACCG	CCTC	99	643	1170	0.0846154
ACGC|TCGC	ACGC	TCGC	39	789	461	0.0845987
GACC|TCGC	GACC	TCGC	39	576	461	0.0845987
CGAC|CGCG	CGCG	CGAC	58	732	686	0.0845481
GCCA|GCCT	GCCA	GCCT	35	596	414	0.0845411
ACCG|TCAC	ACCG	TCAC	43	643	509	0.0844794
ACCA|CACA	CACA	ACCA	51	704	605	0.0842975
CGGC|GCAC	CGGC	GCAC	55	464	653	0.0842266
GCAC|GCCG	GCAC	GCCG	46	653	547	0.0840951
CGGC|GCCA	GCCA	CGGC	39	596	464	0.0840517
CACG|GCCA	CACG	GCCA	50	756	596	0.0838926
CGCG|GCCA	CGCG	GCCA	50	732	596	0.0838926
GCCA|GCGC	GCGC	GCCA	50	649	596	0.0838926
ACAC|ACCT	ACAC	ACCT	40	841	477	0.0838574
ACCT|ACGC	ACGC	ACCT	40	789	477	0.0838574
ACCT|CGCG	CGCG	ACCT	40	732	477	0.0838574
ACCT|GCCA	GCCA	ACCT	40	596	477	0.0838574
ACCT|GCGC	GCGC	ACCT	40	649	477	0.0838574
CACG|GGAC	CACG	GGAC	29	756	346	0.083815
GCCC|GGAC	GCCC	GGAC	29	1318	346	0.083815
CACA|CCCG	CACA	CCCG	103	704	1229	0.083808
CACA|TCCC	TCCC	CACA	59	819	704	0.0838068
ACGC|CCGC	ACGC	CCGC	126	789	1504	0.0837766
ACCG|CCGT	ACCG	CCGT	36	643	430	0.0837209
AGGA|GACG	AGGA	GACG	32	718	383	0.0835509
GACC|GACG	GACC	GACG	32	576	383	0.0835509
CTGC|GCGC	GCGC	CTGC	33	649	395	0.0835443
ACCG|CATC	ACCG	CATC	35	643	419	0.0835322
CATC|CGCA	CGCA	CATC	35	674	419	0.0835322
AACC|ACCG	ACCG	AACC	39	643	468	0.0833333
ACAC|TCCC	TCCC	ACAC	70	819	841	0.0832342
ACCG|CGCC	ACCG	CGCC	130	643	1563	0.0831734
ACCA|CCAA	ACCA	CCAA	37	605	445	0.0831461
CCAA|TCCC	TCCC	CCAA	37	819	445	0.0831461
CCGC|GCAC	GCAC	CCGC	125	653	1504	0.0831117
CGAC|TGCC	CGAC	TGCC	31	686	373	0.0831099
TCGC|TGCC	TCGC	TGCC	31	461	373	0.0831099
ACAC|ACGA	ACAC	ACGA	30	841	361	0.0831025
ACCA|ACGA	ACCA	ACGA	30	605	361	0.0831025
ACGA|ACGC	ACGC	ACGA	30	789	361	0.0831025
ACGA|CCGA	CCGA	ACGA	30	502	361	0.0831025
CAGC|CTCG	CTCG	CAGC	29	460	349	0.0830946
CAGC|GCAC	GCAC	CAGC	29	653	349	0.0830946
ACAC|CGCT	ACAC	CGCT	38	841	458	0.0829694
ACGC|CACT	ACGC	CACT	38	789	458	0.0829694
CGCT|GCCA	GCCA	CGCT	38	596	458	0.0829694
CACT|GCCG	GCCG	CACT	38	547	458	0.0829694
CCTC|CGAC	CGAC	CCTC	97	686	1170	0.082906
GCAC|TCCG	GCAC	TCCG	31	653	374	0.0828877
CACG|GTCC	CACG	GTCC	29	756	350	0.0828571
CGCA|GTCC	CGCA	GTCC	29	674	350	0.0828571
CGCT|GTCC	CGCT	GTCC	29	458	350	0.0828571
ACCA|CGGC	CGGC	ACCA	50	464	605	0.0826446
CCTG|CTCG	CCTG	CTCG	38	413	460	0.0826087
CGCC|CGCG	CGCG	CGCC	129	732	1563	0.0825336
ACAC|CTAC	ACAC	CTAC	34	841	412	0.0825243
CAAC|CTAC	CAAC	CTAC	34	627	412	0.0825243
AACC|TCAC	AACC	TCAC	42	468	509	0.0825147
CACA|GCTC	CACA	GCTC	32	704	388	0.0824742
GCCA|GCTC	GCCA	GCTC	32	596	388	0.0824742
ACCG|ACGC	ACCG	ACGC	65	643	789	0.0823828
CCAT|GACC	GACC	CCAT	28	576	340	0.0823529
ACCG|CCTG	ACCG	CCTG	34	643	413	0.0823245
CCAC|CGCG	CGCG	CCAC	134	732	1628	0.0823096
ACAC|GCCG	ACAC	GCCG	45	841	547	0.0822669
ACCG|GCCA	ACCG	GCCA	49	643	596	0.0822148
CCGA|GCCA	CCGA	GCCA	49	502	596	0.0822148
CCGG|GCCG	GCCG	CCGG	30	547	365	0.0821918
ACGC|AGGA	ACGC	AGGA	59	789	718	0.0821727
ACTC|CGCA	CGCA	ACTC	35	674	426	0.0821596
GCCT|GCGC	GCGC	GCCT	34	649	414	0.0821256
ACCG|CCCT	ACCG	CCCT	87	643	1060	0.0820755
ACAC|ACGC	ACGC	ACAC	69	789	841	0.0820452
ACAC|GCAC	GCAC	ACAC	69	653	841	0.0820452
ACAC|CACC	ACAC	CACC	131	841	1597	0.0820288
CACG|GACC	GACC	CACG	62	576	756	0.0820106
CGCG|GCAC	GCAC	CGCG	60	653	732	0.0819672
CGGC|GACC	GACC	CGGC	38	576	464	0.0818966
CGCC|GCAC	GCAC	CGCC	128	653	1563	0.0818938
CGCA|TCCC	CGCA	TCCC	67	674	819	0.0818071
ACAC|CCGC	ACAC	CCGC	123	841	1504	0.0817819
ACGA|GGCC	ACGA	GGCC	35	361	428	0.0817757
CGCG|GGCC	CGCG	GGCC	35	732	428	0.0817757
CCAC|GCAC	GCAC	CCAC	133	653	1628	0.0816953
CCAC|TCAC	TCAC	CCAC	133	509	1628	0.0816953
CACT|CCGA	CACT	CCGA	41	458	502	0.0816733
CACG|GCGC	CACG	GCGC	53	756	649	0.0816641
CCCA|CTCA	CTCA	CCCA	95	462	1164	0.0816151
ACAC|CGCA	ACAC	CGCA	55	841	674	0.0816024
CCAC|GAGG	CCAC	GAGG	60	1628	736	0.0815217
CGTC|CTCG	CTCG	CGTC	36	460	442	0.081448
CGTC|GACC	GACC	CGTC	36	576	442	0.081448
CAAC|CCGT	CAAC	CCGT	35	627	430	0.0813953
ACGC|CGCC	ACGC	CGCC	127	789	1563	0.081254
AACC|GCCG	GCCG	AACC	38	547	468	0.0811966
GACC|GCCC	GACC	GCCC	107	576	1318	0.0811836
ACGC|GCAC	ACGC	GCAC	53	789	653	0.0811639
CACA|CATC	CACA	CATC	34	704	419	0.0811456
CATC|GACC	GACC	CATC	34	576	419	0.0811456
CATC|GCCA	GCCA	CATC	34	596	419	0.0811456
CCCT|CGCG	CGCG	CCCT	86	732	1060	0.0811321
ACGC|CACG	CACG	ACGC	64	756	789	0.0811153
ACCA|CGCG	CGCG	ACCA	49	732	605	0.0809917
CTCC|GACG	CTCC	GACG	31	978	383	0.0809399
CAAC|GGAC	CAAC	GGAC	28	627	346	0.0809249
CGCA|CGCT	CGCA	CGCT	37	674	458	0.080786
CGCT|GCAC	GCAC	CGCT	37	653	458	0.080786
ACAC|CTCC	ACAC	CTCC	79	841	978	0.0807771
CGAC|CTCC	CGAC	CTCC	79	686	978	0.0807771
CACC|GCGC	GCGC	CACC	129	649	1597	0.0807765
AACA|CACA	CACA	AACA	28	704	347	0.0806916
ACCG|CGCG	ACCG	CGCG	59	643	732	0.0806011
CGCG|TCCC	TCCC	CGCG	59	819	732	0.0806011
ACCT|TCCC	ACCT	TCCC	66	477	819	0.0805861
GCCG|TCCC	GCCG	TCCC	66	547	819	0.0805861
ACAC|TCAC	ACAC	TCAC	41	841	509	0.0805501
ACAC|GCCA	ACAC	GCCA	48	841	596	0.0805369
ACCA|GCCA	ACCA	GCCA	48	605	596	0.0805369
CACA|CCGC	CACA	CCGC	121	704	1504	0.0804521
CGGC|GCCG	CGGC	GCCG	44	464	547	0.0804388
GCCA|GCCG	GCCA	GCCG	44	596	547	0.0804388
GCTC|TGCC	GCTC	TGCC	30	388	373	0.080429
ACGA|CACG	CACG	ACGA	29	756	361	0.0803324
ACGA|CGCA	CGCA	ACGA	29	674	361	0.0803324
AGCC|GCAC	GCAC	AGCC	31	653	386	0.0803109
ACCA|TCGC	ACCA	TCGC	37	605	461	0.0802603
CGAC|TCGC	CGAC	TCGC	37	686	461	0.0802603
ACAC|CAGC	ACAC	CAGC	28	841	349	0.0802292
CAAC|CAGC	CAAC	CAGC	28	627	349	0.0802292
CAGC|GCCA	GCCA	CAGC	28	596	349	0.0802292
CAGC|GCCG	GCCG	CAGC	28	547	349	0.0802292
CGAC|GCGC	CGAC	GCGC	52	686	649	0.0801233
CGCA|CGGC	CGGC	CGCA	54	464	674	0.0801187
CCAA|TCCA	CCAA	TCCA	28	445	350	0.08
CGCA|TCCA	CGCA	TCCA	28	674	350	0.08
CGCG|TCCA	CGCG	TCCA	28	732	350	0.08
ACCA|GCTC	ACCA	GCTC	31	605	388	0.0798969
CACT|GCTC	CACT	GCTC	31	458	388	0.0798969
CCCA|CCCA	CCCA	CCCA	93	1164	1164	0.0798969
CCAC|GCCG	GCCG	CCAC	130	547	1628	0.0798526
ACCT|ACTC	ACCT	ACTC	34	477	426	0.0798122
CCGC|CGCA	CGCA	CCGC	120	674	1504	0.0797872
CGCA|CTCC	CGCA	CTCC	78	674	978	0.0797546
CAAC|CACA	CACA	CAAC	50	704	627	0.0797448
CAAC|GACC	GACC	CAAC	50	576	627	0.0797448
AACC|CGGC	AACC	CGGC	37	468	464	0.0797414
CCGA|CGGC	CCGA	CGGC	37	502	464	0.0797414
CGGC|CTCC	CTCC	CGGC	37	978	464	0.0797414
CCCG|GCCA	GCCA	CCCG	98	596	1229	0.0797396
CGCA|GCCT	CGCA	GCCT	33	674	414	0.0797101
ACCT|CGAC	CGAC	ACCT	38	686	477	0.0796646
ACCT|TCAC	TCAC	ACCT	38	509	477	0.0796646
ACCC|CGAC	CGAC	ACCC	98	686	1231	0.0796101
ACCC|CGCA	CGCA	ACCC	98	674	1231	0.0796101
ACGC|CACA	ACGC	CACA	56	789	704	0.0795455
CACA|GACA	CACA	GACA	28	704	352	0.0795455
CACA|CGCG	CGCG	CACA	56	732	704	0.0795455
GACA|GCGC	GCGC	GACA	28	649	352	0.0795455
CACC|CGCG	CGCG	CACC	127	732	1597	0.0795241
ACCA|CCTC	ACCA	CCTC	93	605	1170	0.0794872
ACAC|CCGG	ACAC	CCGG	29	841	365	0.0794521
ACCT|GGCC	ACCT	GGCC	34	477	428	0.0794393
GGCC|TCAC	TCAC	GGCC	34	509	428	0.0794393
CCAT|GCCG	GCCG	CCAT	27	547	340	0.0794118
ACCG|TCCC	ACCG	TCCC	65	643	819	0.0793651
TCCC|TCCC	TCCC	TCCC	65	819	819	0.0793651
ACCA|CGCA	CGCA	ACCA	48	674	605	0.0793388
ACCA|GCCA	GCCA	ACCA	48	596	605	0.0793388
CAAC|CGCC	CAAC	CGCC	124	627	1563	0.0793346
ACCG|CCGA	CCGA	ACCG	51	502	643	0.0793157
ACCG|GACC	GACC	ACCG	51	576	643	0.0793157
ACCG|GCCG	GCCG	ACCG	51	547	643	0.0793157
CAAC|CCAC	CAAC	CCAC	129	627	1628	0.0792383
CCAC|GCCA	GCCA	CCAC	129	596	1628	0.0792383
CGAC|CGCG	CGAC	CGCG	58	686	732	0.079235
ACCT|CGTC	ACCT	CGTC	35	477	442	0.0791855
CCGC|GACC	GACC	CCGC	119	576	1504	0.0791223
AACC|ACCT	ACCT	AACC	37	477	468	0.0790598
AACC|CGGC	CGGC	AACC	37	464	468	0.0790598
CCTA|CGTC	CGTC	CCTA	29	442	367	0.0790191
CCTA|GACC	GACC	CCTA	29	576	367	0.0790191
ACCA|CCCG	ACCA	CCCG	97	605	1229	0.078926
GCAC|GCCC	GCAC	GCCC	104	653	1318	0.0789074
ACCG|CACC	ACCG	CACC	126	643	1597	0.0788979
ACCC|GACC	GACC	ACCC	97	576	1231	0.0787977
ACCG|CCAA	ACCG	CCAA	35	643	445	0.0786517
CCAA|GCCA	GCCA	CCAA	35	596	445	0.0786517
CACG|CGCA	CACG	CGCA	53	756	674	0.078635
CCTC|CGCG	CGCG	CCTC	92	732	1170	0.0786325
CCAC|CTCA	CTCA	CCAC	128	462	1628	0.0786241
CCGA|GCCG	CCGA	GCCG	43	502	547	0.0786106
CACT|CGAC	CGAC	CACT	36	686	458	0.0786026
ACCA|TCAC	ACCA	TCAC	40	605	509	0.0785855
CACT|TCAC	CACT	TCAC	40	458	509	0.0785855
GACC|TCAC	GACC	TCAC	40	576	509	0.0785855
GCAC|GCGC	GCAC	GCGC	51	653	649	0.0785824
ACGC|CAAC	CAAC	ACGC	62	627	789	0.0785805
CCGA|CTGC	CCGA	CTGC	31	502	395	0.078481
ACGC|GACG	ACGC	GACG	30	789	383	0.078329
CCCT|GCGC	GCGC	CCCT	83	649	1060	0.0783019
ACCA|CACC	ACCA	CACC	125	605	1597	0.0782718
ACAC|CTCG	ACAC	CTCG	36	841	460	0.0782609
ACCT|CTCG	ACCT	CTCG	36	477	460	0.0782609
CGTC|CTCG	CGTC	CTCG	36	442	460	0.0782609
CTCG|GCAC	GCAC	CTCG	36	653	460	0.0782609
CCCA|TCAC	TCAC	CCCA	91	509	1164	0.0781787
CAAC|CGAC	CGAC	CAAC	49	686	627	0.0781499
CGAC|TCCC	CGAC	TCCC	64	686	819	0.0781441
GCAC|GCGC	GCGC	GCAC	51	649	653	0.0781011
ACCG|TCGC	ACCG	TCGC	36	643	461	0.0780911
CCGC|GGAC	CCGC	GGAC	27	1504	346	0.0780347
ACCC|CAAC	CAAC	ACCC	96	627	1231	0.0779854
ACCC|CGCG	CGCG	ACCC	96	732	1231	0.0779854
CGAC|CTCA	CGAC	CTCA	36	686	462	0.0779221
ACAC|CGCG	ACAC	CGCG	57	841	732	0.0778689
CGCG|CGTC	CGTC	CGCG	57	442	732	0.0778689
AACA|GACC	GACC	AACA	27	576	347	0.0778098
CCGC|CGCG	CGCG	CCGC	117	732	1504	0.0777926
ACCT|CCTC	ACCT	CCTC	91	477	1170	0.0777778
CACA|CCTC	CACA	CCTC	91	704	1170	0.0777778
CCTC|CGCA	CGCA	CCTC	91	674	1170	0.0777778
ACCG|CTCA	CTCA	ACCG	50	462	643	0.0777605
AGCC|TGCC	AGCC	TGCC	29	386	373	0.077748
CAAC|TGCC	CAAC	TGCC	29	627	373	0.077748
CGGC|TGCC	CGGC	TGCC	29	464	373	0.077748
AGCC|CACG	CACG	AGCC	30	756	386	0.0777202
AGCC|GACC	GACC	AGCC	30	576	386	0.0777202
AGCC|GCCA	GCCA	AGCC	30	596	386	0.0777202
ACCG|CTCC	ACCG	CTCC	76	643	978	0.0777096
CCGA|CGAC	CGAC	CCGA	39	686	502	0.0776892
ACCA|CAAC	CAAC	ACCA	47	627	605	0.077686
CTAC|GACC	GACC	CTAC	32	576	412	0.0776699
AACC|ACCT	AACC	ACCT	37	468	477	0.0775681
ACGA|CCCT	CCCT	ACGA	28	1060	361	0.0775623
ACCG|TCCG	ACCG	TCCG	29	643	374	0.0775401
CGAC|TCCG	CGAC	TCCG	29	686	374	0.0775401
CCTG|CGGC	CGGC	CCTG	32	464	413	0.0774818
CGCA|GCCC	CGCA	GCCC	102	674	1318	0.07739
GCCC|TCAC	TCAC	GCCC	102	509	1318	0.07739
ACCA|CAGC	ACCA	CAGC	27	605	349	0.0773639
ACCA|CCCT	ACCA	CCCT	82	605	1060	0.0773585
CACA|CCCT	CACA	CCCT	82	704	1060	0.0773585
CCCA|GCAC	GCAC	CCCA	90	653	1164	0.0773196
CCCA|GCCG	GCCG	CCCA	90	547	1164	0.0773196
GCTC|TCGC	TCGC	GCTC	30	461	388	0.0773196
GCTC|TGCC	TGCC	GCTC	30	373	388	0.0773196
GCCG|GCCT	GCCG	GCCT	32	547	414	0.0772947
CGCA|GCCG	GCCG	CGCA	52	547	674	0.0771513
ACGC|TCCA	ACGC	TCCA	27	789	350	0.0771429
GCCA|GCGC	GCCA	GCGC	50	596	649	0.0770416
AACC|ACCA	ACCA	AACC	36	605	468	0.0769231
AACC|GCAC	GCAC	AACC	36	653	468	0.0769231
CGTC|TCGC	TCGC	CGTC	34	461	442	0.0769231
CACA|CCGT	CACA	CCGT	33	704	430	0.0767442
CCGT|CGGC	CGGC	CCGT	33	464	430	0.0767442
CCGT|CTCG	CTCG	CCGT	33	460	430	0.0767442
ACCA|CACG	ACCA	CACG	58	605	756	0.0767196
CAAC|CCGG	CAAC	CCGG	28	627	365	0.0767123
CCGG|CGGC	CGGC	CCGG	28	464	365	0.0767123
CAAC|GACA	CAAC	GACA	27	627	352	0.0767045
CACG|GACA	CACG	GACA	27	756	352	0.0767045
CACG|CCCC	CACG	CCCC	167	756	2178	0.0766758
CAAC|GCCC	CAAC	GCCC	101	627	1318	0.0766313
GAGG|TCAC	GAGG	TCAC	39	736	509	0.0766208
CACA|CGCG	CACA	CGCG	56	704	732	0.0765027
CAAC|CCCG	CAAC	CCCG	94	627	1229	0.0764849
ACCA|CCAT	ACCA	CCAT	26	605	340	0.0764706
CCAT|CGGC	CGGC	CCAT	26	464	340	0.0764706
CCAT|GCAC	GCAC	CCAT	26	653	340	0.0764706
ACCG|CACT	ACCG	CACT	35	643	458	0.0764192
CACT|CGCT	CACT	CGCT	35	458	458	0.0764192
CACT|CGCT	CGCT	CACT	35	458	458	0.0764192
AGGA|CCAA	AGGA	CCAA	34	718	445	0.0764045
CGCG|GACC	CGCG	GACC	44	732	576	0.0763889
ACCC|CACA	CACA	ACCC	94	704	1231	0.0763607
ACCG|GCCA	GCCA	ACCG	49	596	643	0.0762053
CCAC|GCGC	GCGC	CCAC	124	649	1628	0.0761671
CACA|CTCG	CACA	CTCG	35	704	460	0.076087
CCGA|CTCG	CCGA	CTCG	35	502	460	0.076087
ACGC|GACC	GACC	ACGC	60	576	789	0.0760456
CTCG|CTGC	CTCG	CTGC	30	460	395	0.0759494
CTGC|GACC	GACC	CTGC	30	576	395	0.0759494
CACA|GCCC	CACA	GCCC	100	704	1318	0.0758725
CGAC|GCGC	GCGC	CGAC	52	649	686	0.0758017
ACCA|CTCA	ACCA	CTCA	35	605	462	0.0757576
ACCT|CTCA	ACCT	CTCA	35	477	462	0.0757576
CTCA|GCAC	GCAC	CTCA	35	653	462	0.0757576
CCCT|GACG	CCCT	GACG	29	1060	383	0.075718
GACG|GCAC	GCAC	GACG	29	653	383	0.075718
GCAC|TCCC	GCAC	TCCC	62	653	819	0.0757021
CCGA|TCAC	TCAC	CCGA	38	509	502	0.0756972
CCCG|CGCG	CGCG	CCCG	93	732	1229	0.0756713
ACCA|CCCA	ACCA	CCCA	88	605	1164	0.0756014
CGTC|GCGC	CGTC	GCGC	49	442	649	0.0755008
CGCC|GCCA	GCCA	CGCC	118	596	1563	0.0754958
CGCC|GCGC	GCGC	CGCC	118	649	1563	0.0754958
ACCA|ACCT	ACCA	ACCT	36	605	477	0.0754717
ACCT|CTCG	CTCG	ACCT	36	460	477	0.0754717
ACCT|GACC	GACC	ACCT	36	576	477	0.0754717
ACCT|GCAC	GCAC	ACCT	36	653	477	0.0754717
ACCT|GCCG	GCCG	ACCT	36	547	477	0.0754717
CACG|CTCG	CTCG	CACG	57	460	756	0.0753968
ACAC|CACA	ACAC	CACA	53	841	704	0.0752841
CACA|GCCA	GCCA	CACA	53	596	704	0.0752841
CCGT|CTAC	CCGT	CTAC	31	430	412	0.0752427
CGCA|GGAC	CGCA	GGAC	26	674	346	0.0751445
CACC|GCCA	GCCA	CACC	120	596	1597	0.0751409
CCGC|GCCA	GCCA	CCGC	113	596	1504	0.075133
AGCC|CCGA	CCGA	AGCC	29	502	386	0.0751295
AGCC|CTCA	CTCA	AGCC	29	462	386	0.0751295
AGCC|TGCC	TGCC	AGCC	29	373	386	0.0751295
ACCA|ACTC	ACCA	ACTC	32	605	426	0.0751174
ACTC|CGAC	CGAC	ACTC	32	686	426	0.0751174
GCCC|TCGC	TCGC	GCCC	99	461	1318	0.0751138
CTCA|TGCC	CTCA	TGCC	28	462	373	0.075067
CCGA|CCTG	CCGA	CCTG	31	502	413	0.0750605
CCTG|GCAC	GCAC	CCTG	31	653	413	0.0750605
CACA|GCAC	CACA	GCAC	49	704	653	0.0750383
CGTC|GCAC	CGTC	GCAC	49	442	653	0.0750383
ACCA|CAAC	ACCA	CAAC	47	605	627	0.0749601
ACCA|GCCG	ACCA	GCCG	41	605	547	0.0749543
GACC|GCCG	GACC	GCCG	41	576	547	0.0749543
AACA|CCTC	CCTC	AACA	26	1170	347	0.074928
CTCA|GCCT	CTCA	GCCT	31	462	414	0.0748792
GACC|GCCT	GACC	GCCT	31	576	414	0.0748792
ACCT|TCCG	ACCT	TCCG	28	477	374	0.0748663
ACCA|CGCC	ACCA	CGCC	117	605	1563	0.074856
CGCA|CGCC	CGCA	CGCC	117	674	1563	0.074856
AACC|AGGA	AGGA	AACC	35	718	468	0.0747863
AACC|CCGA	CCGA	AACC	35	502	468	0.0747863
ACGC|AGGA	AGGA	ACGC	59	718	789	0.0747782
ACCA|GGCC	ACCA	GGCC	32	605	428	0.0747664
GCCA|GGCC	GCCA	GGCC	32	596	428	0.0747664
CGTC|GCCA	GCCA	CGTC	33	596	442	0.0746606
ACCT|TCAC	ACCT	TCAC	38	477	509	0.0746562
CCGA|TCAC	CCGA	TCAC	38	502	509	0.0746562
GCAC|TCAC	GCAC	TCAC	38	653	509	0.0746562
ACAC|ACCG	ACAC	ACCG	48	841	643	0.0746501
ACCT|CTCC	ACCT	CTCC	73	477	978	0.0746421
CTCC|GCCG	GCCG	CTCC	73	547	978	0.0746421
ACCT|CCCT	ACCT	CCCT	79	477	1060	0.0745283
CAGC|CCGA	CCGA	CAGC	26	502	349	0.0744986
GCGC|TCCC	GCGC	TCCC	61	649	819	0.0744811
ACCA|CCGC	ACCA	CCGC	112	605	1504	0.0744681
ACGC|CCGT	ACGC	CCGT	32	789	430	0.0744186
CCGT|GACC	GACC	CCGT	32	576	430	0.0744186
ACAC|CCTC	ACAC	CCTC	87	841	1170	0.074359
CGAC|CGGC	CGGC	CGAC	51	464	686	0.074344
AACC|TCCA	AACC	TCCA	26	468	350	0.0742857
ACCG|TCCA	ACCG	TCCA	26	643	350	0.0742857
CACG|TCCA	CACG	TCCA	26	756	350	0.0742857
CCGA|TCCA	CCGA	TCCA	26	502	350	0.0742857
GCCG|GTCC	GCCG	GTCC	26	547	350	0.0742857
CGCT|TGCC	TGCC	CGCT	34	373	458	0.0742358
CGCA|GAGG	GAGG	CGCA	50	736	674	0.074184
CAAC|CACG	CAAC	CACG	56	627	756	0.0740741
CACG|TCGC	TCGC	CACG	56	461	756	0.0740741
CCGG|CGCG	CGCG	CCGG	27	732	365	0.0739726
CCGG|GCGC	GCGC	CCGG	27	649	365	0.0739726
ACCA|CTCG	ACCA	CTCG	34	605	460	0.073913
CTCG|GCCG	GCCG	CTCG	34	547	460	0.073913
CTCG|TCGC	TCGC	CTCG	34	461	460	0.073913
CCCA|CGCT	CGCT	CCCA	86	458	1164	0.0738832
CGAC|GACA	CGAC	GACA	26	686	352	0.0738636
GACA|GCAC	GCAC	GACA	26	653	352	0.0738636
CAAC|GCCA	CAAC	GCCA	44	627	596	0.0738255
GCCA|GCCG	GCCG	GCCA	44	547	596	0.0738255
CGTC|TCGC	CGTC	TCGC	34	442	461	0.0737527
CTCG|TCGC	CTCG	TCGC	34	460	461	0.0737527
CCGA|CGGC	CGGC	CCGA	37	464	502	0.0737052
CTCC|GCAC	GCAC	CTCC	72	653	978	0.0736196
CGCC|GACC	GACC	CGCC	115	576	1563	0.0735765
CACT|CCTA	CACT	CCTA	27	458	367	0.0735695
CCGT|CCTA	CCGT	CCTA	27	430	367	0.0735695
CACA|CCAT	CACA	CCAT	25	704	340	0.0735294
CCAT|CGAC	CGAC	CCAT	25	686	340	0.0735294
CCAT|CGCA	CGCA	CCAT	25	674	340	0.0735294
ACCG|CTGC	ACCG	CTGC	29	643	395	0.0734177
CACA|CTGC	CACA	CTGC	29	704	395	0.0734177
ACCT|CGTC	CGTC	ACCT	35	442	477	0.0733753
ACCT|CTCA	CTCA	ACCT	35	462	477	0.0733753
CAAC|CGCG	CGCG	CAAC	46	732	627	0.0733652
CAAC|CGGC	CAAC	CGGC	34	627	464	0.0732759
CAAC|CACC	CAAC	CACC	117	627	1597	0.0732624
ACCA|TCCC	ACCA	TCCC	60	605	819	0.0732601
GCCG|GCGC	GCGC	GCCG	40	649	547	0.0731261
CGCG|GACG	CGCG	GACG	28	732	383	0.073107
CGCA|GGAG	CGCA	GGAG	47	674	644	0.0729814
AACC|GACC	AACC	GACC	42	468	576	0.0729167
CGCT|GACC	CGCT	GACC	42	458	576	0.0729167
GACC|GCGC	GCGC	GACC	42	649	576	0.0729167
AACC|CGAC	AACC	CGAC	50	468	686	0.0728863
ACTC|CTAC	ACTC	CTAC	30	426	412	0.0728155
CCAA|CTAC	CCAA	CTAC	30	445	412	0.0728155
CCGA|CTAC	CCGA	CTAC	30	502	412	0.0728155
CGCA|CTAC	CGCA	CTAC	30	674	412	0.0728155
CGCG|CTAC	CGCG	CTAC	30	732	412	0.0728155
CTAC|GGCC	GGCC	CTAC	30	428	412	0.0728155
ACTC|CCGA	CCGA	ACTC	31	502	426	0.07277
ACTC|GACC	GACC	ACTC	31	576	426	0.07277
ACTC|GAGG	GAGG	ACTC	31	736	426	0.07277
ACCA|GAGG	GAGG	ACCA	44	736	605	0.0727273
CGCG|TCAC	CGCG	TCAC	37	732	509	0.0726916
TCAC|TGCC	TGCC	TCAC	37	373	509	0.0726916
AACC|CACA	CACA	AACC	34	704	468	0.0726496
AACC|CACG	CACG	AACC	34	756	468	0.0726496
CCTC|GCAC	GCAC	CCTC	85	653	1170	0.0726496
AACC|GCGC	GCGC	AACC	34	649	468	0.0726496
CACC|TCAC	TCAC	CACC	116	509	1597	0.0726362
AGCC|CTGC	CTGC	AGCC	28	395	386	0.0725389
AGCC|GCCT	GCCT	AGCC	28	414	386	0.0725389
CACA|GCCT	CACA	GCCT	30	704	414	0.0724638
CATC|GCCT	CATC	GCCT	30	419	414	0.0724638
CCGA|GCCT	CCGA	GCCT	30	502	414	0.0724638
ACCA|CACA	ACCA	CACA	51	605	704	0.0724432
CACA|CACG	CACG	CACA	51	756	704	0.0724432
GCAC|GGCC	GCAC	GGCC	31	653	428	0.0724299
GGCC|TCGC	TCGC	GGCC	31	461	428	0.0724299
CCGA|GCGC	CCGA	GCGC	47	502	649	0.0724191
CCCG|TCGC	TCGC	CCCG	89	461	1229	0.0724166
ACCA|CGTC	ACCA	CGTC	32	605	442	0.0723982
CGTC|GCCG	GCCG	CGTC	32	547	442	0.0723982
GCCG|TGCC	GCCG	TGCC	27	547	373	0.0723861
ACCC|GCCG	GCCG	ACCC	89	547	1231	0.0722989
CCCT|GGAC	CCCT	GGAC	25	1060	346	0.0722543
CGTC|TCCG	CGTC	TCCG	27	442	374	0.0721925
CAAC|GCTC	CAAC	GCTC	28	627	388	0.0721649
GCCA|TCGC	TCGC	GCCA	43	461	596	0.0721477
ACCA|CCGT	ACCA	CCGT	31	605	430	0.072093
CCGT|CTAC	CTAC	CCGT	31	412	430	0.072093
CCGA|CGCT	CCGA	CGCT	33	502	458	0.0720524
CACT|GACC	GACC	CACT	33	576	458	0.0720524
CGCT|GCCG	GCCG	CGCT	33	547	458	0.0720524
AACA|CACG	CACG	AACA	25	756	347	0.0720461
AACA|CTCC	CTCC	AACA	25	978	347	0.0720461
CACA|TCCC	CACA	TCCC	59	704	819	0.0720391
CGCG|TCCC	CGCG	TCCC	59	732	819	0.0720391
CCGA|GCAC	CCGA	GCAC	47	502	653	0.0719755
CCAA|CGCG	CGCG	CCAA	32	732	445	0.0719101
CCAA|GACC	GACC	CCAA	32	576	445	0.0719101
CCAC|GACC	GACC	CCAC	117	576	1628	0.0718673
CAAC|GCAC	GCAC	CAAC	45	653	627	0.0717703
CCGT|CTCG	CCGT	CTCG	33	430	460	0.0717391
CCCT|CGCA	CGCA	CCCT	76	674	1060	0.0716981
ACGC|CAGC	ACGC	CAGC	25	789	349	0.0716332
CACA|CAGC	CACA	CAGC	25	704	349	0.0716332
CACG|CAGC	CACG	CAGC	25	756	349	0.0716332
CATC|CGCT	CGCT	CATC	30	458	419	0.071599
CATC|GCCT	GCCT	CATC	30	414	419	0.071599
GCAC|TCGC	GCAC	TCGC	33	653	461	0.0715835
CAAC|CTCC	CAAC	CTCC	70	627	978	0.0715746
CACA|CTCC	CACA	CTCC	70	704	978	0.0715746
ACCG|CGGC	CGGC	ACCG	46	464	643	0.0715397
CAAC|CGAC	CAAC	CGAC	49	627	686	0.0714286
CCGA|CTCA	CCGA	CTCA	33	502	462	0.0714286
CCGT|TCCA	CCGT	TCCA	25	430	350	0.0714286
CGCA|CTCA	CGCA	CTCA	33	674	462	0.0714286
CGGC|GTCC	CGGC	GTCC	25	464	350	0.0714286
CTCA|TCCA	CTCA	TCCA	25	462	350	0.0714286
CGAC|GACC	GACC	CGAC	49	576	686	0.0714286
GCAC|TCCA	GCAC	TCCA	25	653	350	0.0714286
GCAC|GTCC	GCAC	GTCC	25	653	350	0.0714286
CTCA|GCCA	GCCA	CTCA	33	596	462	0.0714286
GTCC|TCGC	TCGC	GTCC	25	461	350	0.0714286
CACA|GCCG	CACA	GCCG	39	704	547	0.071298
ACCT|ACTC	ACTC	ACCT	34	426	477	0.0712788
ACCT|GGCC	GGCC	ACCT	34	428	477	0.0712788
CCAC|CGCT	CGCT	CCAC	116	458	1628	0.0712531
CCAC|TCGC	TCGC	CCAC	116	461	1628	0.0712531
ACCT|CCGG	ACCT	CCGG	26	477	365	0.0712329
CCGG|CCTG	CCTG	CCGG	26	413	365	0.0712329
ACCA|CGCA	ACCA	CGCA	48	605	674	0.0712166
CACA|CGCA	CACA	CGCA	48	704	674	0.0712166
ACCA|GACC	ACCA	GACC	41	605	576	0.0711806
GACC|GCCG	GCCG	GACC	41	547	576	0.0711806
ACGC|CCCC	ACGC	CCCC	155	789	2178	0.0711662
CCGT|CGGC	CCGT	CGGC	33	430	464	0.0711207
ACCA|GCGC	GCGC	ACCA	43	649	605	0.0710744
CAAC|CACA	CAAC	CACA	50	627	704	0.0710227
CACA|CCGA	CCGA	CACA	50	502	704	0.0710227
CACA|GACC	GACC	CACA	50	576	704	0.0710227
GACA|TCCC	TCCC	GACA	25	819	352	0.0710227
ACGC|CACA	CACA	ACGC	56	704	789	0.0709759
CCTC|GCCG	GCCG	CCTC	83	547	1170	0.0709402
CCTC|TCAC	TCAC	CCTC	83	509	1170	0.0709402
AGCC|CTGC	AGCC	CTGC	28	386	395	0.0708861
CTGC|TCAC	TCAC	CTGC	28	509	395	0.0708861
CTGC|TCGC	TCGC	CTGC	28	461	395	0.0708861
ACGC|GCGC	ACGC	GCGC	46	789	649	0.0708783
CATC|GCGC	CATC	GCGC	46	419	649	0.0708783
GCGC|TCGC	TCGC	GCGC	46	461	649	0.0708783
CATC|TCCC	CATC	TCCC	58	419	819	0.0708181
AACC|CACC	AACC	CACC	113	468	1597	0.0707577
CACC|CGAC	CGAC	CACC	113	686	1597	0.0707577
CACC|GCCG	GCCG	CACC	113	547	1597	0.0707577
AAGG|ACGC	ACGC	AAGG	30	789	424	0.0707547
CCCT|GCAC	GCAC	CCCT	75	653	1060	0.0707547
GCCT|TCAC	GCCT	TCAC	36	414	509	0.0707269
ACAC|CCAC	ACAC	CCAC	115	841	1628	0.0706388
ACCA|GCCC	ACCA	GCCC	93	605	1318	0.0705615
CTCA|CTCC	CTCA	CTCC	69	462	978	0.0705521
CTCC|GACC	GACC	CTCC	69	576	978	0.0705521
AACC|CGCG	CGCG	AACC	33	732	468	0.0705128
ACCA|GACG	ACCA	GACG	27	605	383	0.0704961
CAAC|GACG	CAAC	GACG	27	627	383	0.0704961
CGAC|GACG	CGAC	GACG	27	686	383	0.0704961
CACA|CCCA	CACA	CCCA	82	704	1164	0.0704467
GCAC|GCCG	GCCG	GCAC	46	547	653	0.0704441
ACAC|ACTC	ACAC	ACTC	30	841	426	0.0704225
ACTC|CTAC	CTAC	ACTC	30	412	426	0.0704225
ACTC|GCCG	GCCG	ACTC	30	547	426	0.0704225
ACTC|TCAC	TCAC	ACTC	30	509	426	0.0704225
CACA|CGCC	CACA	CGCC	110	704	1563	0.0703775
CAAC|CCTG	CAAC	CCTG	29	627	413	0.0702179
CCTG|GGCC	GGCC	CCTG	29	428	413	0.0702179
ACCG|CAAC	ACCG	CAAC	44	643	627	0.0701754
ACCT|CAAC	ACCT	CAAC	44	477	627	0.0701754
CAAC|GCCA	GCCA	CAAC	44	596	627	0.0701754
CAAC|CGTC	CAAC	CGTC	31	627	442	0.0701357
CACG|CGCA	CGCA	CACG	53	674	756	0.0701058
CACG|CGGC	CGGC	CACG	53	464	756	0.0701058
CACG|GCCG	GCCG	CACG	53	547	756	0.0701058
CACG|GCGC	GCGC	CACG	53	649	756	0.0701058
AACC|GGCC	AACC	GGCC	30	468	428	0.0700935
CAAC|GGCC	CAAC	GGCC	30	627	428	0.0700935
CCGT|GGCC	CCGT	GGCC	30	430	428	0.0700935
CTAC|GGCC	CTAC	GGCC	30	412	428	0.0700935
GCGC|GGCC	GCGC	GGCC	30	649	428	0.0700935
ACTC|GCCT	ACTC	GCCT	29	426	414	0.0700483
CCAC|CCGA	CCGA	CCAC	114	502	1628	0.0700246
CGAC|GCCG	GCCG	CGAC	48	547	686	0.0699708
AGCC|CAAC	CAAC	AGCC	27	627	386	0.0699482
ACCA|CACT	ACCA	CACT	32	605	458	0.069869
CACT|GCCA	GCCA	CACT	32	596	458	0.069869
CACT|GGAG	GGAG	CACT	32	644	458	0.069869
CCGC|GCCG	GCCG	CCGC	105	547	1504	0.0698138
CCGT|GGCC	GGCC	CCGT	30	428	430	0.0697674
CGCC|TCAC	TCAC	CGCC	109	509	1563	0.0697377
CACT|CGCA	CACT	CGCA	47	458	674	0.0697329
CGCA|GGAG	GGAG	CGCA	47	644	674	0.0697329
AACC|CCGA	AACC	CCGA	35	468	502	0.0697211
CCGA|CTCG	CTCG	CCGA	35	460	502	0.0697211
ACCA|ACGC	ACCA	ACGC	55	605	789	0.0697085
CACA|CCAA	CACA	CCAA	31	704	445	0.0696629
CCAA|GGAG	GGAG	CCAA	31	644	445	0.0696629
AGGA|GACA	GACA	AGGA	50	352	718	0.0696379
CACA|GCAC	GCAC	CACA	49	653	704	0.0696023
ACTC|TCCC	ACTC	TCCC	57	426	819	0.0695971
CCTG|GCTC	CCTG	GCTC	27	413	388	0.0695876
CTGC|GCTC	CTGC	GCTC	27	395	388	0.0695876
ACCG|CTCG	ACCG	CTCG	32	643	460	0.0695652
CGTC|CTCC	CGTC	CTCC	68	442	978	0.0695297
CTCA|TCCG	CTCA	TCCG	26	462	374	0.0695187
CACC|GACC	GACC	CACC	111	576	1597	0.0695053
AACC|GCCG	AACC	GCCG	38	468	547	0.0694698
CAAC|GCCG	CAAC	GCCG	38	627	547	0.0694698
CACT|GCCG	CACT	GCCG	38	458	547	0.0694698
GACC|TCAC	TCAC	GACC	40	509	576	0.0694444
ACCA|CGAC	CGAC	ACCA	42	686	605	0.0694215
ACCA|CCAC	ACCA	CCAC	113	605	1628	0.0694103
CACA|CCAC	CACA	CCAC	113	704	1628	0.0694103
AACC|GGAC	AACC	GGAC	24	468	346	0.0693642
CCCA|GGAC	CCCA	GGAC	24	1164	346	0.0693642
CCCG|GGAC	CCCG	GGAC	24	1229	346	0.0693642
CCTG|GCGC	CCTG	GCGC	45	413	649	0.0693374
CACG|CTCA	CACG	CTCA	32	756	462	0.0692641
CTCA|GCCG	GCCG	CTCA	32	547	462	0.0692641
ACGA|GACC	GACC	ACGA	25	576	361	0.0692521
ACGA|GCAC	GCAC	ACGA	25	653	361	0.0692521
CAAC|CCTC	CAAC	CCTC	81	627	1170	0.0692308
CAAC|CATC	CAAC	CATC	29	627	419	0.0692124
ACCT|CCGA	CCGA	ACCT	33	502	477	0.0691824
AACA|ACCG	ACCG	AACA	24	643	347	0.0691643
AACA|GACA	GACA	AACA	24	352	347	0.0691643
CCTG|CGGC	CCTG	CGGC	32	413	464	0.0689655
CGGC|TCAC	TCAC	CGGC	32	509	464	0.0689655
CAAC|GCAC	CAAC	GCAC	45	627	653	0.0689127
CGCA|GCAC	CGCA	GCAC	45	674	653	0.0689127
CACA|CACC	CACA	CACC	110	704	1597	0.0688791
CTAC|GCCA	CTAC	GCCA	41	412	596	0.0687919
CTCG|GCCA	CTCG	GCCA	41	460	596	0.0687919
ACCT|CACG	ACCT	CACG	52	477	756	0.0687831
CACG|CCGA	CCGA	CACG	52	502	756	0.0687831
CAGC|CCTA	CCTA	CAGC	24	367	349	0.0687679
CAGC|CTCA	CTCA	CAGC	24	462	349	0.0687679
GCCG|TCAC	GCCG	TCAC	35	547	509	0.0687623
AACC|CAAC	AACC	CAAC	43	468	627	0.0685805
ACAC|TCCA	ACAC	TCCA	24	841	350	0.0685714
CCGA|GTCC	CCGA	GTCC	24	502	350	0.0685714
CTCG|TCCA	CTCG	TCCA	24	460	350	0.0685714
GCTC|GTCC	GCTC	GTCC	24	388	350	0.0685714
GGCC|GTCC	GGCC	GTCC	24	428	350	0.0685714
ACAC|CGAC	ACAC	CGAC	47	841	686	0.0685131
CTCC|TCAC	TCAC	CTCC	67	509	978	0.0685072
CCGA|CGCC	CCGA	CGCC	107	502	1563	0.0684581
ACCG|CAAC	CAAC	ACCG	44	627	643	0.0684292
ACCG|CACA	CACA	ACCG	44	704	643	0.0684292
CCTG|TCCC	CCTG	TCCC	56	413	819	0.0683761
CTCA|TCCC	CTCA	TCCC	56	462	819	0.0683761
CTGC|TCCC	CTGC	TCCC	56	395	819	0.0683761
TCCA|TCCC	TCCA	TCCC	56	350	819	0.0683761
TCCC|TCGC	TCGC	TCCC	56	461	819	0.0683761
ACCA|CTGC	ACCA	CTGC	27	605	395	0.0683544
CTGC|GCTC	GCTC	CTGC	27	388	395	0.0683544
CCCG|CGCT	CGCT	CCCG	84	458	1229	0.0683483
CCCG|CTCG	CTCG	CCCG	84	460	1229	0.0683483
CCCG|GCCG	GCCG	CCCG	84	547	1229	0.0683483
CGCG|GCCA	GCCA	CGCG	50	596	732	0.068306
ACCC|GCGC	GCGC	ACCC	84	649	1231	0.0682372
AACA|GACA	AACA	GACA	24	347	352	0.0681818
AAGG|GACA	AAGG	GACA	24	424	352	0.0681818
ACGC|GACA	ACGC	GACA	24	789	352	0.0681818
CACA|CGCA	CGCA	CACA	48	674	704	0.0681818
CTCC|GACA	CTCC	GACA	24	978	352	0.0681818
GACA|GACC	GACC	GACA	24	576	352	0.0681818
CCAA|CCTA	CCAA	CCTA	25	445	367	0.0681199
CCGA|CCTA	CCGA	CCTA	25	502	367	0.0681199
CCTA|GGCC	GGCC	CCTA	25	428	367	0.0681199
ACTC|CCGT	CCGT	ACTC	29	430	426	0.0680751
ACTC|GCCT	GCCT	ACTC	29	414	426	0.0680751
ACTC|GGCC	GGCC	ACTC	29	428	426	0.0680751
AACC|CTAC	AACC	CTAC	28	468	412	0.0679612
CACT|CTAC	CACT	CTAC	28	458	412	0.0679612
CGTC|CTAC	CGTC	CTAC	28	442	412	0.0679612
CTAC|GAGG	GAGG	CTAC	28	736	412	0.0679612
CCCC|GCCA	GCCA	CCCC	148	596	2178	0.0679522
CGCA|GAGG	CGCA	GAGG	50	674	736	0.0679348
CAAC|CCCT	CAAC	CCCT	72	627	1060	0.0679245
CCCT|TCGC	TCGC	CCCT	72	461	1060	0.0679245
ACCG|CGTC	ACCG	CGTC	30	643	442	0.0678733
CATC|CCCA	CATC	CCCA	79	419	1164	0.0678694
CCCA|GACC	GACC	CCCA	79	576	1164	0.0678694
CCGC|TCGC	TCGC	CCGC	102	461	1504	0.0678191
AGCC|GCGC	AGCC	GCGC	44	386	649	0.0677966
CACA|GCGC	CACA	GCGC	44	704	649	0.0677966
CCTG|GACC	GACC	CCTG	28	576	413	0.0677966
ACAC|ACCA	ACCA	ACAC	57	605	841	0.0677765
ACAC|CGCG	CGCG	ACAC	57	732	841	0.0677765
ACAC|GCGC	GCGC	ACAC	57	649	841	0.0677765
ACCA|ACCG	ACCG	ACCA	41	643	605	0.0677686
ACCA|GACC	GACC	ACCA	41	576	605	0.0677686
ACCA|GCCG	GCCG	ACCA	41	547	605	0.0677686
ACTC|GGCC	ACTC	GGCC	29	426	428	0.067757
CCTG|GGCC	CCTG	GGCC	29	413	428	0.067757
CGGC|GGCC	CGGC	GGCC	29	464	428	0.067757
CCGA|GCTC	GCTC	CCGA	34	388	502	0.0677291
GACC|GGCC	GGCC	GACC	39	428	576	0.0677083
GACC|TCCG	TCCG	GACC	39	374	576	0.0677083
GACC|TCGC	TCGC	GACC	39	461	576	0.0677083
CAAC|CGCT	CAAC	CGCT	31	627	458	0.0676856
CACT|CGCG	CGCG	CACT	31	732	458	0.0676856
CACT|CTCA	CTCA	CACT	31	462	458	0.0676856
CACT|GCTC	GCTC	CACT	31	388	458	0.0676856
CGCT|TCCA	TCCA	CGCT	31	350	458	0.0676856
ACCT|GCCT	ACCT	GCCT	28	477	414	0.0676329
AGCC|GCCT	AGCC	GCCT	28	386	414	0.0676329
CGGC|GCCT	CGGC	GCCT	28	464	414	0.0676329
GCAC|GCCT	GCAC	GCCT	28	653	414	0.0676329
GCCT|GGCC	GGCC	GCCT	28	428	414	0.0676329
CACT|CCCG	CACT	CCCG	83	458	1229	0.0675346
CCCG|GCGC	GCGC	CCCG	83	649	1229	0.0675346
CCGA|CTCC	CCGA	CTCC	66	502	978	0.0674847
CTCC|GCGC	GCGC	CTCC	66	649	978	0.0674847
CACA|CACG	CACA	CACG	51	704	756	0.0674603
CACG|CCAA	CCAA	CACG	51	445	756	0.0674603
ACTC|CCGT	ACTC	CCGT	29	426	430	0.0674419
CCGT|GCCG	GCCG	CCGT	29	547	430	0.0674419
ACCT|CCAA	ACCT	CCAA	30	477	445	0.0674157
CCAA|CTAC	CTAC	CCAA	30	412	445	0.0674157
CGGC|CTCG	CGGC	CTCG	31	464	460	0.0673913
CACG|GCAC	CACG	GCAC	44	756	653	0.0673813
CACT|GCAC	CACT	GCAC	44	458	653	0.0673813
AGCC|TCAC	TCAC	AGCC	26	509	386	0.0673575
AGCC|TCGC	TCGC	AGCC	26	461	386	0.0673575
GGCC|TCGC	GGCC	TCGC	31	428	461	0.0672451
TCGC|TGCC	TGCC	TCGC	31	373	461	0.0672451
ACGC|CCGA	CCGA	ACGC	53	502	789	0.0671736
ACGC|GCAC	GCAC	ACGC	53	653	789	0.0671736
TCAC|TCCC	TCAC	TCCC	55	509	819	0.0671551
ACCT|GCCA	ACCT	GCCA	40	477	596	0.0671141
CCGT|GCCA	CCGT	GCCA	40	430	596	0.0671141
CTGC|GCCA	CTGC	GCCA	40	395	596	0.0671141
GCAC|GCCA	GCAC	GCCA	40	653	596	0.0671141
CACT|CTCA	CACT	CTCA	31	458	462	0.0670996
CTCA|GCCT	GCCT	CTCA	31	414	462	0.0670996
CGAC|CTAC	CTAC	CGAC	46	412	686	0.0670554
CGAC|GGCC	GGCC	CGAC	46	428	686	0.0670554
ACAC|CCCC	ACAC	CCCC	146	841	2178	0.067034
CCCC|CGAC	CGAC	CCCC	146	686	2178	0.067034
CCGT|TGCC	CCGT	TGCC	25	430	373	0.0670241
GGCC|TGCC	GGCC	TGCC	25	428	373	0.0670241
CACC|CTCA	CTCA	CACC	107	462	1597	0.0670006
CCCT|CGAC	CGAC	CCCT	71	686	1060	0.0669811
CCAC|CTCG	CTCG	CCAC	109	460	1628	0.0669533
ACCA|CGCG	ACCA	CGCG	49	605	732	0.0669399
CCGA|CGCG	CCGA	CGCG	49	502	732	0.0669399
ACCG|CGCT	CGCT	ACCG	43	458	643	0.066874
ACCG|TCAC	TCAC	ACCG	43	509	643	0.066874
CAAC|TCCG	CAAC	TCCG	25	627	374	0.0668449
CCGT|TCCG	CCGT	TCCG	25	430	374	0.0668449
CGCT|TCCG	CGCT	TCCG	25	458	374	0.0668449
CTAC|TCCG	CTAC	TCCG	25	412	374	0.0668449
CTCG|TCCG	CTCG	TCCG	25	460	374	0.0668449
CATC|GAGG	GAGG	CATC	28	736	419	0.0668258
CATC|GCAC	GCAC	CATC	28	653	419	0.0668258
CGGC|CTCG	CTCG	CGGC	31	460	464	0.0668103
CACA|TCAC	CACA	TCAC	34	704	509	0.0667976
GGCC|TCAC	GGCC	TCAC	34	428	509	0.0667976
ACGC|CGCA	ACGC	CGCA	45	789	674	0.0667656
AGGA|CGCA	AGGA	CGCA	45	718	674	0.0667656
CGCA|GCAC	GCAC	CGCA	45	653	674	0.0667656
ACCT|CCCG	ACCT	CCCG	82	477	1229	0.0667209
CCTC|CCTG	CCTG	CCTC	78	413	1170	0.0666667
CCTC|CGTC	CGTC	CCTC	78	442	1170	0.0666667
CCTC|CTCA	CTCA	CCTC	78	462	1170	0.0666667
ACCC|CACT	CACT	ACCC	82	458	1231	0.0666125
GACA|GAGG	GACA	GAGG	49	352	736	0.0665761
CACT|CCGC	CACT	CCGC	100	458	1504	0.0664894
ACGA|CGCG	CGCG	ACGA	24	732	361	0.066482
ACGA|CTCC	CTCC	ACGA	24	978	361	0.066482
ACGA|GCCG	GCCG	ACGA	24	547	361	0.066482
ACGA|TCAC	TCAC	ACGA	24	509	361	0.066482
ACCA|GGAC	ACCA	GGAC	23	605	346	0.066474
ACCG|GGAC	ACCG	GGAC	23	643	346	0.066474
CCTG|GGAC	CCTG	GGAC	23	413	346	0.066474
GAGG|GGAC	GAGG	GGAC	23	736	346	0.066474
CACC|GCCT	GCCT	CACC	106	414	1597	0.0663745
AACA|CGCA	CGCA	AACA	23	674	347	0.0662824
AACA|GCCA	GCCA	AACA	23	596	347	0.0662824
ACCA|GCGC	ACCA	GCGC	43	605	649	0.0662558
AACC|CGCA	CGCA	AACC	31	674	468	0.0662393
AACC|GCCA	GCCA	AACC	31	596	468	0.0662393
AACC|GGAG	GGAG	AACC	31	644	468	0.0662393
CACG|GCCA	GCCA	CACG	50	596	756	0.0661376
CACG|GGCC	GGCC	CACG	50	428	756	0.0661376
ACCA|TCAC	TCAC	ACCA	40	509	605	0.0661157
CCCT|CTCG	CTCG	CCCT	70	460	1060	0.0660377
AAGG|GAGG	GAGG	AAGG	28	736	424	0.0660377
CGCT|GCCC	CGCT	GCCC	87	458	1318	0.0660091
CGGC|GACC	CGGC	GACC	38	464	576	0.0659722
CAAC|TCCC	CAAC	TCCC	54	627	819	0.0659341
CTCG|TCCC	CTCG	TCCC	54	460	819	0.0659341
CCCG|CCGA	CCGA	CCCG	81	502	1229	0.0659072
ACGC|CTCG	CTCG	ACGC	52	460	789	0.0659062
CAGC|CGTC	CGTC	CAGC	23	442	349	0.0659026
CAGC|TGCC	TGCC	CAGC	23	373	349	0.0659026
CCGA|CCGC	CCGA	CCGC	99	502	1504	0.0658245
CCGC|CTCA	CTCA	CCGC	99	462	1504	0.0658245
ACCT|GCCG	ACCT	GCCG	36	477	547	0.0658135
AGCC|GCCG	AGCC	GCCG	36	386	547	0.0658135
CATC|GCCG	CATC	GCCG	36	419	547	0.0658135
GCCG|GCTC	GCTC	GCCG	36	388	547	0.0658135
CCTC|GCGC	GCGC	CCTC	77	649	1170	0.065812
AACC|ACCC	AACC	ACCC	81	468	1231	0.0658002
AACC|CCGG	AACC	CCGG	24	468	365	0.0657534
CCGG|CCGT	CCGT	CCGG	24	430	365	0.0657534
CCGG|GGCC	GGCC	CCGG	24	428	365	0.0657534
ACCT|CCGA	ACCT	CCGA	33	477	502	0.0657371
CCGA|CGCT	CGCT	CCGA	33	458	502	0.0657371
CCGA|CTCA	CTCA	CCGA	33	462	502	0.0657371
ACTC|CACA	CACA	ACTC	28	704	426	0.0657277
ACTC|GCGC	GCGC	ACTC	28	649	426	0.0657277
AACC|GTCC	AACC	GTCC	23	468	350	0.0657143
CACT|TCCA	CACT	TCCA	23	458	350	0.0657143
CTAC|GTCC	CTAC	GTCC	23	412	350	0.0657143
TCAC|TCCA	TCAC	TCCA	23	509	350	0.0657143
CCTA|CGTC	CCTA	CGTC	29	367	442	0.0656109
CGAC|GCTC	GCTC	CGAC	45	388	686	0.0655977
CGAC|TCAC	TCAC	CGAC	45	509	686	0.0655977
CGCG|TCGC	TCGC	CGCG	48	461	732	0.0655738
CAAC|CACT	CAAC	CACT	30	627	458	0.0655022
CATC|CGCT	CATC	CGCT	30	419	458	0.0655022
CGCT|GCGC	GCGC	CGCT	30	649	458	0.0655022
CGCG|CTCC	CGCG	CTCC	64	732	978	0.0654397
CGGC|GCCA	CGGC	GCCA	39	464	596	0.0654362
CCGA|GGCC	CCGA	GGCC	28	502	428	0.0654206
CTCG|GGCC	CTCG	GGCC	28	460	428	0.0654206
GCCT|GGCC	GCCT	GGCC	28	414	428	0.0654206
ACAC|CAAC	CAAC	ACAC	55	627	841	0.0653983
ACAC|CGCA	CGCA	ACAC	55	674	841	0.0653983
ACTC|CCTA	ACTC	CCTA	24	426	367	0.0653951
AGCC|CCTA	AGCC	CCTA	24	386	367	0.0653951
CCTA|CGCG	CGCG	CCTA	24	732	367	0.0653951
CAGC|CCTA	CAGC	CCTA	24	349	367	0.0653951
ACCT|CCTG	ACCT	CCTG	27	477	413	0.0653753
[truncated: 2,490 more rows]

## Sheet: 5
Motifs	Motif 1	Motif 2	Coincidence	Motif 1 incidence	Motif 2 incidence	Co-occurrence metric
AACAC|GGAGG	GGAGG	AACAC	27	371	156	0.173077
CGCCC|GACCC	CGCCC	GACCC	31	697	200	0.155
CCCAC|GTCCC	CCCAC	GTCCC	18	679	119	0.151261
CACCC|CCAGC	CACCC	CCAGC	22	632	147	0.14966
CATCC|CCCAC	CCCAC	CATCC	26	679	176	0.147727
CGCCC|TCCCC	CGCCC	TCCCC	48	697	330	0.145455
CCACC|GCCTC	CCACC	GCCTC	28	737	194	0.14433
ACCCC|CGCCC	CGCCC	ACCCC	65	697	463	0.140389
CCACC|TCACC	CCACC	TCACC	30	737	214	0.140187
ACTCC|CCGCC	CCGCC	ACTCC	24	699	173	0.138728
CCACC|GCCCT	CCACC	GCCCT	28	737	202	0.138614
CCACC|GCTCC	CCACC	GCTCC	23	737	166	0.138554
AGCCC|CACCC	CACCC	AGCCC	22	632	163	0.134969
CACCC|CTCCA	CACCC	CTCCA	23	632	172	0.133721
CCACC|TCCTC	CCACC	TCCTC	16	737	120	0.133333
CACAA|GGAGG	GGAGG	CACAA	14	371	106	0.132075
CCAAC|CCCCC	CCCCC	CCAAC	33	646	250	0.132
CCCCC|TCACG	CCCCC	TCACG	13	646	100	0.13
CCACC|GGCGC	CCACC	GGCGC	14	737	108	0.12963
CCACC|CCAGC	CCACC	CCAGC	19	737	147	0.129252
CCACC|CGCTC	CCACC	CGCTC	29	737	226	0.128319
AACAC|AGGAG	AGGAG	AACAC	20	349	156	0.128205
CCACC|CTCAC	CCACC	CTCAC	33	737	260	0.126923
CCGCC|CTCCC	CCGCC	CTCCC	56	699	442	0.126697
CACCC|CAGCC	CACCC	CAGCC	22	632	174	0.126437
CCCTT|CGCCC	CGCCC	CCCTT	18	697	143	0.125874
ACCCC|CCACC	CCACC	ACCCC	58	737	463	0.12527
CCCAC|CCTAC	CCCAC	CCTAC	23	679	184	0.125
CCCAC|GCCCG	CCCAC	GCCCG	32	679	257	0.124514
ACACA|GGAGG	GGAGG	ACACA	22	371	177	0.124294
GCCCC|TCCCC	GCCCC	TCCCC	41	541	330	0.124242
CCAAC|CCACC	CCACC	CCAAC	31	737	250	0.124
CACCC|GCCCT	CACCC	GCCCT	25	632	202	0.123762
CACAA|GAGGA	GAGGA	CACAA	13	303	106	0.122642
CCCAC|CCCTA	CCCAC	CCCTA	19	679	155	0.122581
CCCCA|CCCTA	CCCCA	CCCTA	19	469	155	0.122581
CAACA|GGAGG	GGAGG	CAACA	18	371	147	0.122449
CGCCC|CTCCC	CGCCC	CTCCC	54	697	442	0.122172
CCACC|CTCTC	CCACC	CTCTC	15	737	123	0.121951
CCCTC|CTCCT	CCCTC	CTCCT	15	554	123	0.121951
ACCGA|CCCAC	CCCAC	ACCGA	13	679	107	0.121495
CCACC|CGCCT	CCACC	CGCCT	25	737	206	0.121359
CCCTC|TGCAC	CCCTC	TGCAC	11	554	91	0.120879
AACCC|CCACC	CCACC	AACCC	21	737	174	0.12069
CCACC|TGCCC	CCACC	TGCCC	20	737	166	0.120482
CCACC|CTGCC	CCACC	CTGCC	21	737	175	0.12
CCCCC|CTCCG	CCCCC	CTCCG	20	646	167	0.11976
CCCAC|CGCTC	CCCAC	CGCTC	27	679	226	0.119469
CCGCC|TCCGC	CCGCC	TCCGC	21	699	177	0.118644
CACCC|GCCTC	CACCC	GCCTC	23	632	194	0.118557
CCACC|GCACG	CCACC	GCACG	16	737	135	0.118519
CCACG|CCGCC	CCGCC	CCACG	35	699	296	0.118243
CACCA|CACCC	CACCC	CACCA	34	632	288	0.118056
CACCA|CCCGC	CCCGC	CACCA	34	628	288	0.118056
CCGCC|TCCCT	CCGCC	TCCCT	17	699	144	0.118056
CCCGC|CCTCC	CCCGC	CCTCC	60	628	511	0.117417
CACCC|CCCTC	CACCC	CCCTC	65	632	554	0.117329
CCACC|CCCTC	CCACC	CCCTC	65	737	554	0.117329
CCACC|CCCAA	CCACC	CCCAA	20	737	171	0.116959
CACCC|TCACC	CACCC	TCACC	25	632	214	0.116822
CCCTC|TCACC	CCCTC	TCACC	25	554	214	0.116822
ACCCC|TCCTC	ACCCC	TCCTC	14	463	120	0.116667
CCCAC|TCCTC	CCCAC	TCCTC	14	679	120	0.116667
AGCCC|CCACC	CCACC	AGCCC	19	737	163	0.116564
CGCCC|CGCCT	CGCCC	CGCCT	24	697	206	0.116505
CCACC|TCGCC	CCACC	TCGCC	22	737	189	0.116402
CGCCC|TCGCC	CGCCC	TCGCC	22	697	189	0.116402
CCCGC|CTCCA	CCCGC	CTCCA	20	628	172	0.116279
CACTC|CCCGC	CCCGC	CACTC	23	628	198	0.116162
CCGCC|TCCAC	CCGCC	TCCAC	23	699	198	0.116162
CCCAG|CGCCC	CGCCC	CCCAG	14	697	121	0.115702
CCACC|CCTCC	CCACC	CCTCC	59	737	511	0.11546
CACCC|CTCAC	CACCC	CTCAC	30	632	260	0.115385
ACCCA|CCGCC	CCGCC	ACCCA	26	699	226	0.115044
CCGCC|GACCC	CCGCC	GACCC	23	699	200	0.115
AACCC|CACCC	CACCC	AACCC	20	632	174	0.114943
CAGCC|CCACC	CCACC	CAGCC	20	737	174	0.114943
CAGCC|CGCCC	CGCCC	CAGCC	20	697	174	0.114943
CGCCC|TCCCG	CGCCC	TCCCG	17	697	148	0.114865
ACCCC|CCGCC	CCGCC	ACCCC	53	699	463	0.114471
CACCC|GCTCC	CACCC	GCTCC	19	632	166	0.114458
CCACC|CTCGC	CCACC	CTCGC	27	737	236	0.114407
CGCCC|CTCGC	CGCCC	CTCGC	27	697	236	0.114407
CGCCC|CTGCC	CGCCC	CTGCC	20	697	175	0.114286
CCCAC|CTCTC	CCCAC	CTCTC	14	679	123	0.113821
CACGA|CCGCC	CCGCC	CACGA	14	699	123	0.113821
CCGCC|CTCTC	CCGCC	CTCTC	14	699	123	0.113821
CACCC|CCTCA	CACCC	CCTCA	26	632	229	0.113537
CCCAC|CCTCA	CCCAC	CCTCA	26	679	229	0.113537
CACCT|CCCTC	CCCTC	CACCT	26	554	229	0.113537
CGCCC|GCCTC	CGCCC	GCCTC	22	697	194	0.113402
CGCAC|CGCGT	CGCAC	CGCGT	13	333	115	0.113043
CGCCC|TCCGC	CGCCC	TCCGC	20	697	177	0.112994
CCACC|CCTCT	CCACC	CCTCT	15	737	133	0.112782
CCCCT|CGCCC	CGCCC	CCCCT	46	697	408	0.112745
CCACC|CTACC	CCACC	CTACC	18	737	160	0.1125
CCCAC|TCCCC	CCCAC	TCCCC	37	679	330	0.112121
CCCTT|CCGCC	CCGCC	CCCTT	16	699	143	0.111888
CCCAC|CGCCT	CCCAC	CGCCT	23	679	206	0.11165
CCGCC|CCTCC	CCGCC	CCTCC	57	699	511	0.111546
CCCAC|CTCAC	CCCAC	CTCAC	29	679	260	0.111538
CCCAA|CCCAC	CCCAC	CCCAA	19	679	171	0.111111
ACCAC|CACCC	CACCC	ACCAC	36	632	325	0.110769
ACCCA|CCCGC	CCCGC	ACCCA	25	628	226	0.110619
CCACC|CTCCA	CCACC	CTCCA	19	737	172	0.110465
CCCCC|CTCCA	CCCCC	CTCCA	19	646	172	0.110465
CGACG|CGCCC	CGCCC	CGACG	16	697	145	0.110345
CCACC|GCACC	CCACC	GCACC	28	737	255	0.109804
CCCAC|GCACC	CCCAC	GCACC	28	679	255	0.109804
CGCCC|GCCCA	CGCCC	GCCCA	28	697	255	0.109804
CCCGC|CCCTG	CCCGC	CCCTG	18	628	164	0.109756
CCCCC|CCCTA	CCCCC	CCCTA	17	646	155	0.109677
CACCC|TCCCC	CACCC	TCCCC	36	632	330	0.109091
CCACC|TCCCC	CCACC	TCCCC	36	737	330	0.109091
CACCC|GCCCG	CACCC	GCCCG	28	632	257	0.108949
CCACC|GCCAA	CCACC	GCCAA	10	737	92	0.108696
CCCCC|CCTAC	CCCCC	CCTAC	20	646	184	0.108696
CCGCC|GCCAA	CCGCC	GCCAA	10	699	92	0.108696
ACCTC|CGCCC	CGCCC	ACCTC	25	697	230	0.108696
CTGCC|GCCCC	GCCCC	CTGCC	19	541	175	0.108571
CGCCC|TGCCC	CGCCC	TGCCC	18	697	166	0.108434
CCCCA|TCCTC	CCCCA	TCCTC	13	469	120	0.108333
CCACC|CCCGC	CCACC	CCCGC	68	737	628	0.10828
CCCAC|CGCAC	CCCAC	CGCAC	36	679	333	0.108108
ACCAA|CCCCC	CCCCC	ACCAA	12	646	111	0.108108
CCCTC|TCCCG	CCCTC	TCCCG	16	554	148	0.108108
ACACT|GGAGG	GGAGG	ACACT	12	371	111	0.108108
CATCC|CCACC	CCACC	CATCC	19	737	176	0.107955
CATCC|CGCCC	CGCCC	CATCC	19	697	176	0.107955
CCTTC|CGCCC	CGCCC	CCTTC	15	697	139	0.107914
CCCCC|CGACA	CCCCC	CGACA	14	646	130	0.107692
ACAAC|GGAGG	GGAGG	ACAAC	14	371	130	0.107692
CCCAG|CCCGC	CCCGC	CCCAG	13	628	121	0.107438
CCCGC|GACCG	CCCGC	GACCG	13	628	121	0.107438
CCCAG|CCGCC	CCGCC	CCCAG	13	699	121	0.107438
ACCGC|CCCGC	CCCGC	ACCGC	34	628	318	0.106918
CAACC|CCCCC	CCCCC	CAACC	25	646	234	0.106838
CCACC|CCTCG	CCACC	CCTCG	22	737	207	0.10628
CCCCG|CTACC	CCCCG	CTACC	17	467	160	0.10625
CCCAC|CGCCA	CCCAC	CGCCA	33	679	311	0.106109
CCCGC|TCCAC	CCCGC	TCCAC	21	628	198	0.106061
CCCTC|CCTGC	CCCTC	CCTGC	21	554	198	0.106061
CACTC|CCGCC	CCGCC	CACTC	21	699	198	0.106061
CCGCG|CGCCC	CGCCC	CCGCG	30	697	283	0.106007
ACCCC|CTCCT	ACCCC	CTCCT	13	463	123	0.105691
CACCC|CTCCT	CACCC	CTCCT	13	632	123	0.105691
CCACC|CTCCT	CCACC	CTCCT	13	737	123	0.105691
CCCCA|CTCCT	CCCCA	CTCCT	13	469	123	0.105691
CGCCC|CTCTC	CGCCC	CTCTC	13	697	123	0.105691
CCGCA|CCGCC	CCGCC	CCGCA	28	699	265	0.10566
CCACC|CCGCT	CCACC	CCGCT	19	737	180	0.105556
CACGC|CCACC	CCACC	CACGC	38	737	361	0.105263
CCACC|CTGAC	CCACC	CTGAC	10	737	95	0.105263
CCCAC|CCTCT	CCCAC	CCTCT	14	679	133	0.105263
CCACG|CGCCC	CGCCC	CCACG	31	697	296	0.10473
CCGCC|CTCCA	CCGCC	CTCCA	18	699	172	0.104651
ATCCC|CACCC	CACCC	ATCCC	14	632	134	0.104478
CCCAC|GCCGC	CCCAC	GCCGC	28	679	268	0.104478
ACCTC|CCCAC	CCCAC	ACCTC	24	679	230	0.104348
CCCAC|TCCCT	CCCAC	TCCCT	15	679	144	0.104167
CCACC|CTCCC	CCACC	CTCCC	46	737	442	0.104072
CGCCC|TCCCA	CGCCC	TCCCA	13	697	125	0.104
CCAAC|GCCCC	GCCCC	CCAAC	26	541	250	0.104
CCCAC|GCCCT	CCCAC	GCCCT	21	679	202	0.10396
CCGCC|CTCAC	CCGCC	CTCAC	27	699	260	0.103846
ACCGC|CCCAC	CCCAC	ACCGC	33	679	318	0.103774
ACCCG|CCACC	CCACC	ACCCG	25	737	241	0.103734
CACCG|CCCGC	CCCGC	CACCG	34	628	329	0.103343
CCACC|CCTAC	CCACC	CCTAC	19	737	184	0.103261
CCCAC|GCCTC	CCCAC	GCCTC	20	679	194	0.103093
CCCAC|CCGCC	CCGCC	CCCAC	70	699	679	0.103093
ACCCC|TCCCC	ACCCC	TCCCC	34	463	330	0.10303
CACCC|CGCCA	CACCC	CGCCA	32	632	311	0.102894
CCCAC|CTGCC	CCCAC	CTGCC	18	679	175	0.102857
CCCGC|CTGCC	CCCGC	CTGCC	18	628	175	0.102857
CCGCC|CTGCC	CCGCC	CTGCC	18	699	175	0.102857
CACCC|CCCTC	CCCTC	CACCC	65	554	632	0.102848
CCACC|CCCCG	CCACC	CCCCG	48	737	467	0.102784
CCGCC|CCGCG	CCGCC	CCGCG	29	699	283	0.102473
CCGCC|TGCCC	CCGCC	TGCCC	17	699	166	0.10241
CCCCA|CGCCC	CGCCC	CCCCA	48	697	469	0.102345
CCCAC|GCCAC	CCCAC	GCCAC	34	679	333	0.102102
CCACC|GCCCA	CCACC	GCCCA	26	737	255	0.101961
ACCCA|CCACC	CCACC	ACCCA	23	737	226	0.10177
CACCC|GACCA	CACCC	GACCA	12	632	118	0.101695
CCCAC|CTCGC	CCCAC	CTCGC	24	679	236	0.101695
CCCAC|CGCCC	CGCCC	CCCAC	69	697	679	0.10162
CACCC|CCGCC	CCGCC	CACCC	64	699	632	0.101266
CACCC|GGCCC	CACCC	GGCCC	17	632	168	0.10119
CCTCC|GGCCC	CCTCC	GGCCC	17	511	168	0.10119
CCACC|GCCCG	CCACC	GCCCG	26	737	257	0.101167
CCCTC|CCGCC	CCGCC	CCCTC	56	699	554	0.101083
CCCGC|TCGAC	CCCGC	TCGAC	10	628	99	0.10101
CCTGC|CTCCC	CTCCC	CCTGC	20	442	198	0.10101
CCACC|GTCCC	CCACC	GTCCC	12	737	119	0.10084
CCCCT|CCGCC	CCGCC	CCCCT	41	699	408	0.10049
CCCCA|CCTCA	CCCCA	CCTCA	23	469	229	0.100437
CACCT|CCCCC	CCCCC	CACCT	23	646	229	0.100437
CCGCC|CCTCA	CCGCC	CCTCA	23	699	229	0.100437
CACCG|CCCAC	CCCAC	CACCG	33	679	329	0.100304
CACCG|CGCCC	CGCCC	CACCG	33	697	329	0.100304
CCCCA|CCGCC	CCGCC	CCCCA	47	699	469	0.100213
CCCAC|CCGCC	CCCAC	CCGCC	70	679	699	0.100143
CCAAC|CCCAC	CCCAC	CCAAC	25	679	250	0.1
CCCCC|CTACC	CCCCC	CTACC	16	646	160	0.1
CCCCC|TCCTC	CCCCC	TCCTC	12	646	120	0.1
CCCCG|CGACA	CCCCG	CGACA	13	467	130	0.1
CCAAC|CCGCC	CCGCC	CCAAC	25	699	250	0.1
CCGCC|TACCC	CCGCC	TACCC	13	699	130	0.1
CCGCC|TCACG	CCGCC	TCACG	10	699	100	0.1
CCTCC|TCCCC	CCTCC	TCCCC	33	511	330	0.1
CCAAC|CGCCC	CGCCC	CCAAC	25	697	250	0.1
CGCCC|CGCGC	CGCCC	CGCGC	33	697	330	0.1
CGCCC|TACCC	CGCCC	TACCC	13	697	130	0.1
CTACC|GCCCC	GCCCC	CTACC	16	541	160	0.1
GCCCC|TCCTC	GCCCC	TCCTC	12	541	120	0.1
CCCGC|CGCCA	CCCGC	CGCCA	31	628	311	0.0996785
ACCCG|CCGCC	CCGCC	ACCCG	24	699	241	0.0995851
ACCCG|CGCCC	CGCCC	ACCCG	24	697	241	0.0995851
CCCGC|CTCCC	CCCGC	CTCCC	44	628	442	0.0995475
CCCAA|CCCCC	CCCCC	CCCAA	17	646	171	0.0994152
CCCAA|CCCTC	CCCTC	CCCAA	17	554	171	0.0994152
CCCCA|GACCG	CCCCA	GACCG	12	469	121	0.0991736
CCCAC|CGCCC	CCCAC	CGCCC	69	679	697	0.0989957
CCCAC|CCGCG	CCCAC	CCGCG	28	679	283	0.0989399
CACCC|TGCAC	CACCC	TGCAC	9	632	91	0.0989011
CCCCC|TGCAC	CCCCC	TGCAC	9	646	91	0.0989011
CACCC|CCCGC	CACCC	CCCGC	62	632	628	0.0987261
ACTCC|CCCGC	CCCGC	ACTCC	17	628	173	0.0982659
ACTCC|CGCCC	CGCCC	ACTCC	17	697	173	0.0982659
ACTCC|TCCCC	TCCCC	ACTCC	17	330	173	0.0982659
CCCAC|CGCCG	CCCAC	CGCCG	27	679	275	0.0981818
AGCCC|CCGCC	CCGCC	AGCCC	16	699	163	0.0981595
CCCAC|TCACC	CCCAC	TCACC	21	679	214	0.0981308
CCGCC|TCACC	CCGCC	TCACC	21	699	214	0.0981308
CACCC|CCACC	CCACC	CACCC	62	737	632	0.0981013
CACCC|CCCGC	CCCGC	CACCC	62	628	632	0.0981013
CACCC|CCACG	CACCC	CCACG	29	632	296	0.097973
CCCAC|CCCTT	CCCAC	CCCTT	14	679	143	0.0979021
CCCCT|CCCTT	CCCCT	CCCTT	14	408	143	0.0979021
AACCC|CCGCC	CCGCC	AACCC	17	699	174	0.0977011
CAACG|CCACC	CCACC	CAACG	12	737	123	0.097561
CACGA|CCCCG	CCCCG	CACGA	12	467	123	0.097561
CCGCC|CTCCT	CCGCC	CTCCT	12	699	123	0.097561
ACCGC|CGCCC	CGCCC	ACCGC	31	697	318	0.0974843
CCCGC|CCCTC	CCCGC	CCCTC	54	628	554	0.0974729
CCCAC|CGTCC	CCCAC	CGTCC	19	679	195	0.0974359
CGCCC|CGCTC	CGCCC	CGCTC	22	697	226	0.0973451
CACCG|CCGCC	CCGCC	CACCG	32	699	329	0.0972644
ACACC|CCACC	CCACC	ACACC	28	737	288	0.0972222
CCCTC|TCCCT	CCCTC	TCCCT	14	554	144	0.0972222
CTCCC|TCCCT	CTCCC	TCCCT	14	442	144	0.0972222
ACCCC|CACCC	CACCC	ACCCC	45	632	463	0.0971922
ACCCC|CCCAC	CCCAC	ACCCC	45	679	463	0.0971922
ATCCC|CCACC	CCACC	ATCCC	13	737	134	0.0970149
ATCCC|CCCAC	CCCAC	ATCCC	13	679	134	0.0970149
ATCCC|CCTCC	CCTCC	ATCCC	13	511	134	0.0970149
CCCTA|CTCCC	CTCCC	CCCTA	15	442	155	0.0967742
CCCAC|CCTCG	CCCAC	CCTCG	20	679	207	0.0966184
CACCC|CGCCC	CGCCC	CACCC	61	697	632	0.096519
CGCCA|CGCCC	CGCCC	CGCCA	30	697	311	0.096463
CACCC|TGCCC	CACCC	TGCCC	16	632	166	0.0963855
CCCTC|GCCAC	CCCTC	GCCAC	32	554	333	0.0960961
CACCT|CCACC	CCACC	CACCT	22	737	229	0.0960699
CCACC|CCTCA	CCACC	CCTCA	22	737	229	0.0960699
CCCTC|CCTCA	CCCTC	CCTCA	22	554	229	0.0960699
CACCT|CGCCC	CGCCC	CACCT	22	697	229	0.0960699
CCACC|TCCGC	CCACC	TCCGC	17	737	177	0.0960452
CCCCC|TCCGC	CCCCC	TCCGC	17	646	177	0.0960452
ACACA|GAGGA	GAGGA	ACACA	17	303	177	0.0960452
CCCGC|TCCCA	CCCGC	TCCCA	12	628	125	0.096
ACCCC|TCCAC	ACCCC	TCCAC	19	463	198	0.0959596
CACCC|TCCAC	CACCC	TCCAC	19	632	198	0.0959596
CCACC|TCCAC	CCACC	TCCAC	19	737	198	0.0959596
CCCAC|CCTGC	CCCAC	CCTGC	19	679	198	0.0959596
CCCCA|TCCAC	CCCCA	TCCAC	19	469	198	0.0959596
CACTC|CCCCG	CCCCG	CACTC	19	467	198	0.0959596
CCACC|CCCCA	CCACC	CCCCA	45	737	469	0.0959488
CCTCC|CGCCC	CGCCC	CCTCC	49	697	511	0.0958904
CCACC|CTCCG	CCACC	CTCCG	16	737	167	0.0958084
CGCCC|CTCCG	CGCCC	CTCCG	16	697	167	0.0958084
CGCCC|CGCGT	CGCCC	CGCGT	11	697	115	0.0956522
CCCGC|CCTCC	CCTCC	CCCGC	60	511	628	0.0955414
CACCC|CCATC	CACCC	CCATC	18	632	189	0.0952381
CCAGC|CCCAC	CCCAC	CCAGC	14	679	147	0.0952381
CCCGC|GGCAC	CCCGC	GGCAC	10	628	105	0.0952381
CCCGC|TCGCC	CCCGC	TCGCC	18	628	189	0.0952381
CCATC|CCGCC	CCGCC	CCATC	18	699	189	0.0952381
ACGCC|CGCCC	CGCCC	ACGCC	28	697	294	0.0952381
GCCCC|GGCCC	GCCCC	GGCCC	16	541	168	0.0952381
ACCCC|CCCCC	CCCCC	ACCCC	44	646	463	0.0950324
CTCCC|GCCCC	GCCCC	CTCCC	42	541	442	0.0950226
ACGCC|CCCGG	ACGCC	CCCGG	13	294	137	0.0948905
ACATC|GGAGG	GGAGG	ACATC	9	371	95	0.0947368
CCACG|CCCAC	CCCAC	CCACG	28	679	296	0.0945946
CCCGC|GCACA	CCCGC	GCACA	14	628	148	0.0945946
CCGCC|TCCCG	CCGCC	TCCCG	14	699	148	0.0945946
ACCGC|CACCC	CACCC	ACCGC	30	632	318	0.0943396
CCCAC|CCGCA	CCCAC	CCGCA	25	679	265	0.0943396
CCGCC|CGTCG	CCGCC	CGTCG	10	699	106	0.0943396
CGCGC|CGTCG	CGCGC	CGTCG	10	330	106	0.0943396
CGCCC|CGGCC	CGCCC	CGGCC	18	697	191	0.0942408
CACGC|CCCAC	CCCAC	CACGC	34	679	361	0.0941828
ACCCC|GCCCT	ACCCC	GCCCT	19	463	202	0.0940594
CAACC|CCCAC	CCCAC	CAACC	22	679	234	0.0940171
CAACC|GCCCC	GCCCC	CAACC	22	541	234	0.0940171
CACCC|CCTCC	CACCC	CCTCC	48	632	511	0.0939335
CCCAC|CCCTC	CCCAC	CCCTC	52	679	554	0.0938628
CCCCA|CCCTC	CCCTC	CCCCA	44	554	469	0.0938166
CCGCC|CTACC	CCGCC	CTACC	15	699	160	0.09375
CACCC|CCACT	CACCC	CCACT	19	632	203	0.0935961
CCACT|CCCGC	CCCGC	CCACT	19	628	203	0.0935961
CCACT|CCGCC	CCGCC	CCACT	19	699	203	0.0935961
CCCAA|CCTCC	CCTCC	CCCAA	16	511	171	0.0935673
ACGGC|CGCCC	CGCCC	ACGGC	10	697	107	0.0934579
ACCCC|CGCCC	ACCCC	CGCCC	65	463	697	0.0932568
CCACC|CGCCC	CCACC	CGCCC	65	737	697	0.0932568
CCCTC|CGCCA	CCCTC	CGCCA	29	554	311	0.0932476
CCGCC|CGCCA	CCGCC	CGCCA	29	699	311	0.0932476
CGCCA|GCCCC	GCCCC	CGCCA	29	541	311	0.0932476
CCACC|CCCCT	CCACC	CCCCT	38	737	408	0.0931373
CCCCA|CCCCT	CCCCA	CCCCT	38	469	408	0.0931373
ACCCT|CCCTC	CCCTC	ACCCT	19	554	204	0.0931373
ACCCT|CCGCC	CCGCC	ACCCT	19	699	204	0.0931373
ACCCT|CGCCC	CGCCC	ACCCT	19	697	204	0.0931373
CCCAC|CTCCA	CCCAC	CTCCA	16	679	172	0.0930233
CCGCC|CGCTC	CCGCC	CGCTC	21	699	226	0.0929204
ACGCA|GGAGG	GGAGG	ACGCA	17	371	183	0.0928962
CCCCC|CGCCC	CGCCC	CCCCC	60	697	646	0.0928793
CCCCA|GCCTC	CCCCA	GCCTC	18	469	194	0.0927835
CCACT|GCCGA	CCACT	GCCGA	10	203	108	0.0925926
CCCAC|GCCGA	CCCAC	GCCGA	10	679	108	0.0925926
ACTCC|CCACC	CCACC	ACTCC	16	737	173	0.0924855
ACTCC|CCCCC	CCCCC	ACTCC	16	646	173	0.0924855
ACTCC|CTCCC	CTCCC	ACTCC	16	442	173	0.0924855
CCCCA|CCTAC	CCCCA	CCTAC	17	469	184	0.0923913
CCCAC|CCCGC	CCCAC	CCCGC	58	679	628	0.0923567
CCACC|CCCAT	CCACC	CCCAT	12	737	130	0.0923077
CCACC|CGTCC	CCACC	CGTCC	18	737	195	0.0923077
CCACC|TACCC	CCACC	TACCC	12	737	130	0.0923077
CCCTC|CGTCC	CCCTC	CGTCC	18	554	195	0.0923077
CCGCC|CGACA	CCGCC	CGACA	12	699	130	0.0923077
ACCAC|CCTCC	CCTCC	ACCAC	30	511	325	0.0923077
CCTCC|CGTCC	CCTCC	CGTCC	18	511	195	0.0923077
ACAAC|GAGGA	GAGGA	ACAAC	12	303	130	0.0923077
GCCCC|TACCC	GCCCC	TACCC	12	541	130	0.0923077
CCACC|CCCGC	CCCGC	CCACC	68	628	737	0.0922659
CACCC|CGCCT	CACCC	CGCCT	19	632	206	0.092233
CCCAC|CCCCG	CCCAC	CCCCG	43	679	467	0.0920771
CCACC|GCGCC	CCACC	GCGCC	22	737	239	0.0920502
AGCCC|CGCCC	CGCCC	AGCCC	15	697	163	0.0920245
ACCCC|CCAAC	ACCCC	CCAAC	23	463	250	0.092
CCACC|CCGCG	CCACC	CCGCG	26	737	283	0.0918728
CACAG|CACCC	CACCC	CACAG	9	632	98	0.0918367
ACGCC|CCACC	CCACC	ACGCC	27	737	294	0.0918367
CACAG|CCCGC	CCCGC	CACAG	9	628	98	0.0918367
ACGCC|GCCCC	GCCCC	ACGCC	27	541	294	0.0918367
CCTCG|CGCCC	CGCCC	CCTCG	19	697	207	0.0917874
CACCC|CACCT	CACCC	CACCT	21	632	229	0.0917031
CCTCA|CGCCC	CGCCC	CCTCA	21	697	229	0.0917031
CACCC|CCGCC	CACCC	CCGCC	64	632	699	0.0915594
ACCGC|CCACC	CCACC	ACCGC	29	737	318	0.091195
CACCG|CCACC	CCACC	CACCG	30	737	329	0.0911854
AACGC|CCACC	CCACC	AACGC	12	737	132	0.0909091
CCCAC|CGCGC	CCCAC	CGCGC	30	679	330	0.0909091
CCCCC|CGCCG	CCCCC	CGCCG	25	646	275	0.0909091
CCCCC|TCCAC	CCCCC	TCCAC	18	646	198	0.0909091
CCCTC|TCCCC	CCCTC	TCCCC	30	554	330	0.0909091
ACGAC|CCGCC	CCGCC	ACGAC	13	699	143	0.0909091
CCTGC|CGCCC	CGCCC	CCTGC	18	697	198	0.0909091
CGCCC|TCCAC	CGCCC	TCCAC	18	697	198	0.0909091
CTCCC|TCCAC	CTCCC	TCCAC	18	442	198	0.0909091
ACCCC|GCCCC	GCCCC	ACCCC	42	541	463	0.0907127
CCCCT|GCCCC	GCCCC	CCCCT	37	541	408	0.0906863
CCACC|GCCCC	CCACC	GCCCC	49	737	541	0.090573
CCCTC|CTCCC	CCCTC	CTCCC	40	554	442	0.0904977
ACACA|AGGAG	AGGAG	ACACA	16	349	177	0.0903955
CCCGC|TCCGC	CCCGC	TCCGC	16	628	177	0.0903955
CCCAC|GCTCC	CCCAC	GCTCC	15	679	166	0.0903614
CCCAC|TGCCC	CCCAC	TGCCC	15	679	166	0.0903614
CCCGC|TGCCC	CCCGC	TGCCC	15	628	166	0.0903614
CTCCC|TGCCC	CTCCC	TGCCC	15	442	166	0.0903614
CCCTA|TCCCC	TCCCC	CCCTA	14	330	155	0.0903226
ACCCC|CACCA	ACCCC	CACCA	26	463	288	0.0902778
ACACC|CACCC	CACCC	ACACC	26	632	288	0.0902778
ACACC|CCCCC	CCCCC	ACACC	26	646	288	0.0902778
CCCGC|TCCCT	CCCGC	TCCCT	13	628	144	0.0902778
CACCA|CCGCC	CCGCC	CACCA	26	699	288	0.0902778
CCTCC|TCCCT	CCTCC	TCCCT	13	511	144	0.0902778
CCGAC|CGCCC	CGCCC	CCGAC	25	697	277	0.0902527
CCGAC|GCCCC	GCCCC	CCGAC	25	541	277	0.0902527
CCTCT|CGCCC	CGCCC	CCTCT	12	697	133	0.0902256
CGCCC|GCGAC	CGCCC	GCGAC	12	697	133	0.0902256
CACCC|GCCCA	CACCC	GCCCA	23	632	255	0.0901961
CCGCC|GCCCA	CCGCC	GCCCA	23	699	255	0.0901961
CCACC|CCGCC	CCACC	CCGCC	63	737	699	0.0901288
ACCAA|ACCCC	ACCCC	ACCAA	10	463	111	0.0900901
CACCC|GCGCA	CACCC	GCGCA	10	632	111	0.0900901
CCCCC|CCTCC	CCCCC	CCTCC	46	646	511	0.0900196
CCCTC|CCTCC	CCCTC	CCTCC	46	554	511	0.0900196
CCACC|GACCC	CCACC	GACCC	18	737	200	0.09
CGCCC|TCACG	CGCCC	TCACG	9	697	100	0.09
CACCC|TCGCC	CACCC	TCGCC	17	632	189	0.0899471
CCCCC|TCGCC	CCCCC	TCGCC	17	646	189	0.0899471
CCATC|CCTCC	CCTCC	CCATC	17	511	189	0.0899471
CCATC|CGCCC	CGCCC	CCATC	17	697	189	0.0899471
CCCAC|CTCCG	CCCAC	CTCCG	15	679	167	0.0898204
CCTCC|CTCCG	CCTCC	CTCCG	15	511	167	0.0898204
CAACC|CCACC	CCACC	CAACC	21	737	234	0.0897436
CAACC|CCCCG	CCCCG	CAACC	21	467	234	0.0897436
CAACC|CCGCC	CCGCC	CAACC	21	699	234	0.0897436
CCGCC|CGACC	CCGCC	CGACC	27	699	301	0.089701
CGACC|CGCCC	CGCCC	CGACC	27	697	301	0.089701
ACCCC|ATCCC	ACCCC	ATCCC	12	463	134	0.0895522
ATCCC|CCCCC	CCCCC	ATCCC	12	646	134	0.0895522
CCCCC|GCCGC	CCCCC	GCCGC	24	646	268	0.0895522
ATCCC|CCCGC	CCCGC	ATCCC	12	628	134	0.0895522
ATCCC|CCGCC	CCGCC	ATCCC	12	699	134	0.0895522
CCCGC|GCCCG	CCCGC	GCCCG	23	628	257	0.0894942
CACGA|CCCCC	CCCCC	CACGA	11	646	123	0.0894309
CCCCC|CTCCT	CCCCC	CTCCT	11	646	123	0.0894309
CTCCC|CTCCT	CTCCC	CTCCT	11	442	123	0.0894309
ACCAC|CCCGC	CCCGC	ACCAC	29	628	325	0.0892308
CCCCA|GCCCT	CCCCA	GCCCT	18	469	202	0.0891089
CGCCC|GCCCT	CGCCC	GCCCT	18	697	202	0.0891089
CCCTC|CGGCC	CCCTC	CGGCC	17	554	191	0.0890052
CCCGC|CCGCT	CCCGC	CCGCT	16	628	180	0.0888889
CCGCT|CGCCC	CGCCC	CCGCT	16	697	180	0.0888889
CGCCC|GCCCC	CGCCC	GCCCC	48	697	541	0.0887246
CCACT|CCCCG	CCCCG	CCACT	18	467	203	0.08867
CGCTC|GCCCC	GCCCC	CGCTC	20	541	226	0.0884956
CCCTC|CGCCC	CGCCC	CCCTC	49	697	554	0.0884477
ACGCC|CCCAC	CCCAC	ACGCC	26	679	294	0.0884354
CACCC|CCCCT	CACCC	CCCCT	36	632	408	0.0882353
CCCCT|CCCTC	CCCTC	CCCCT	36	554	408	0.0882353
CCACC|CCCTC	CCCTC	CCACC	65	554	737	0.0881954
CCACC|CGCCC	CGCCC	CCACC	65	697	737	0.0881954
CCCAC|CCTCC	CCCAC	CCTCC	45	679	511	0.0880626
CCACC|TCCCA	CCACC	TCCCA	11	737	125	0.088
CCAAC|CCCCA	CCCCA	CCAAC	22	469	250	0.088
CCAAC|CCCCG	CCCCG	CCAAC	22	467	250	0.088
CCAAC|CCCGC	CCCGC	CCAAC	22	628	250	0.088
ACCCC|TGCAC	ACCCC	TGCAC	8	463	91	0.0879121
CACCC|GCACA	CACCC	GCACA	13	632	148	0.0878378
CCACC|TCCCG	CCACC	TCCCG	13	737	148	0.0878378
CCACC|CTTCC	CCACC	CTTCC	10	737	114	0.0877193
CTCGC|CTTCC	CTCGC	CTTCC	10	236	114	0.0877193
CCCCC|CCCGG	CCCCC	CCCGG	12	646	137	0.0875912
CCCGC|CCCGG	CCCGC	CCCGG	12	628	137	0.0875912
CCCGG|CGCCC	CGCCC	CCCGG	12	697	137	0.0875912
CCCGC|CCGTC	CCCGC	CCGTC	19	628	217	0.0875576
CACCC|CGCCC	CACCC	CGCCC	61	632	697	0.0875179
CCTCC|CTACC	CCTCC	CTACC	14	511	160	0.0875
ACGCA|CCCAC	CCCAC	ACGCA	16	679	183	0.0874317
CGCGG|GCCCC	GCCCC	CGCGG	9	541	103	0.0873786
CACCT|CCGCC	CCGCC	CACCT	20	699	229	0.0873362
CGCAA|GGAGG	GGAGG	CGCAA	11	371	126	0.0873016
CCCCA|CTCCA	CCCCA	CTCCA	15	469	172	0.0872093
CACCC|CGCAC	CACCC	CGCAC	29	632	333	0.0870871
CACGC|CGCGT	CACGC	CGCGT	10	361	115	0.0869565
CCACC|CGCGT	CCACC	CGCGT	10	737	115	0.0869565
CCCAC|CGCGT	CCCAC	CGCGT	10	679	115	0.0869565
ACCTC|CCCCC	CCCCC	ACCTC	20	646	230	0.0869565
CCCCG|GCCAA	CCCCG	GCCAA	8	467	92	0.0869565
ACCTC|CCCTC	CCCTC	ACCTC	20	554	230	0.0869565
ACCTC|CCGCC	CCGCC	ACCTC	20	699	230	0.0869565
CGCCC|GCCAA	CGCCC	GCCAA	8	697	92	0.0869565
CCACC|CGCCA	CCACC	CGCCA	27	737	311	0.0868167
CCACC|CCGCA	CCACC	CCGCA	23	737	265	0.0867925
ACTCC|CCCAC	CCCAC	ACTCC	15	679	173	0.0867052
ACTCC|CCTCC	CCTCC	ACTCC	15	511	173	0.0867052
ACACA|GAGGG	ACACA	GAGGG	11	177	127	0.0866142
CCCGC|CGACC	CCCGC	CGACC	26	628	301	0.0863787
CCGCC|CCTTC	CCGCC	CCTTC	12	699	139	0.0863309
CGCCC|GCACC	CGCCC	GCACC	22	697	255	0.0862745
AACCC|ACCCC	ACCCC	AACCC	15	463	174	0.0862069
CAGCC|CCCGC	CCCGC	CAGCC	15	628	174	0.0862069
CCTCC|GCCCC	GCCCC	CCTCC	44	541	511	0.0861057
CCCCC|CGCCC	CCCCC	CGCCC	60	646	697	0.0860832
ATCAC|CCACT	CCACT	ATCAC	8	203	93	0.0860215
CCCAC|CCGGC	CCCAC	CCGGC	16	679	186	0.0860215
CCCGC|CCCTC	CCCTC	CCCGC	54	554	628	0.0859873
AGCCC|GCGCC	GCGCC	AGCCC	14	239	163	0.0858896
ACACC|CCTGC	ACACC	CCTGC	17	288	198	0.0858586
CCCAC|TCCAC	CCCAC	TCCAC	17	679	198	0.0858586
CACTC|CGCCC	CGCCC	CACTC	17	697	198	0.0858586
CCCAC|CCCCT	CCCAC	CCCCT	35	679	408	0.0857843
CCACC|GGCAC	CCACC	GGCAC	9	737	105	0.0857143
CCCCG|GGCAC	CCCCG	GGCAC	9	467	105	0.0857143
CTGCC|GCCAC	GCCAC	CTGCC	15	333	175	0.0857143
CCTCC|GCCCG	CCTCC	GCCCG	22	511	257	0.0856031
CCACC|CCGCC	CCGCC	CCACC	63	699	737	0.0854817
CAACC|CGCCC	CGCCC	CAACC	20	697	234	0.0854701
CCCAC|CCCGC	CCCGC	CCCAC	58	628	679	0.0854197
CCCTC|GCAAC	CCCTC	GCAAC	11	554	129	0.0852713
CCTCC|GCAAC	CCTCC	GCAAC	11	511	129	0.0852713
CATCC|CCGCC	CCGCC	CATCC	15	699	176	0.0852273
CCACC|CCCCC	CCACC	CCCCC	55	737	646	0.0851393
CCCGC|GACCC	CCCGC	GACCC	17	628	200	0.085
GACCC|GCCAC	GCCAC	GACCC	17	333	200	0.085
CGCCC|CGTCG	CGCCC	CGTCG	9	697	106	0.0849057
CCCCC|CGCGC	CCCCC	CGCGC	28	646	330	0.0848485
CCCCC|TCCCC	CCCCC	TCCCC	28	646	330	0.0848485
ACCCC|TCCGC	ACCCC	TCCGC	15	463	177	0.0847458
AGGAG|TACAC	AGGAG	TACAC	10	349	118	0.0847458
CCCAC|TCCGC	CCCAC	TCCGC	15	679	177	0.0847458
CCCCC|CTCGC	CCCCC	CTCGC	20	646	236	0.0847458
CCCGC|CTCGC	CCCGC	CTCGC	20	628	236	0.0847458
CTCGC|GCCCC	GCCCC	CTCGC	20	541	236	0.0847458
CCACC|CCATC	CCACC	CCATC	16	737	189	0.0846561
CCATC|CCCAC	CCCAC	CCATC	16	679	189	0.0846561
CCGCC|TCGCC	CCGCC	TCGCC	16	699	189	0.0846561
CCATC|CTCCC	CTCCC	CCATC	16	442	189	0.0846561
CCCAC|CCCAT	CCCAC	CCCAT	11	679	130	0.0846154
CCCAT|CCCCA	CCCCA	CCCAT	11	469	130	0.0846154
CCCCC|TACCC	CCCCC	TACCC	11	646	130	0.0846154
CCCAT|CGCCC	CGCCC	CCCAT	11	697	130	0.0846154
CGCCC|CTCAC	CGCCC	CTCAC	22	697	260	0.0846154
CCCGC|CCGCC	CCGCC	CCCGC	53	699	628	0.0843949
CCCCA|GCTCC	CCCCA	GCTCC	14	469	166	0.0843373
CCTCC|GCTCC	CCTCC	GCTCC	14	511	166	0.0843373
GCCAC|TGCCC	GCCAC	TGCCC	14	333	166	0.0843373
GCCCC|GCTCC	GCCCC	GCTCC	14	541	166	0.0843373
ACCCC|CCCGC	CCCGC	ACCCC	39	628	463	0.0842333
CACCG|CTGAC	CACCG	CTGAC	8	329	95	0.0842105
CACCC|CCACC	CACCC	CCACC	62	632	737	0.0841248
ACGGC|CCACC	CCACC	ACGGC	9	737	107	0.0841121
ACCGA|CCCCG	CCCCG	ACCGA	9	467	107	0.0841121
CCCGC|TCACC	CCCGC	TCACC	18	628	214	0.0841121
CGCCC|TCACC	CGCCC	TCACC	18	697	214	0.0841121
ACCGA|GCCCC	GCCCC	ACCGA	9	541	107	0.0841121
ACCCA|CACCC	CACCC	ACCCA	19	632	226	0.0840708
ACCCA|CGCCC	CGCCC	ACCCA	19	697	226	0.0840708
CACCC|GTCCC	CACCC	GTCCC	10	632	119	0.0840336
ACGAC|CCCAC	CCCAC	ACGAC	12	679	143	0.0839161
CCCTC|CCCTT	CCCTC	CCCTT	12	554	143	0.0839161
ACGAC|CGCCC	CGCCC	ACGAC	12	697	143	0.0839161
CCCTA|CCCTC	CCCTC	CCCTA	13	554	155	0.083871
CACCC|CCCAC	CCCAC	CACCC	53	679	632	0.0838608
CCCTC|CTCCG	CCCTC	CTCCG	14	554	167	0.0838323
CTCCG|TCCCC	TCCCC	CTCCG	14	330	167	0.0838323
CCCGC|CGGCC	CCCGC	CGGCC	16	628	191	0.0837696
CCGCC|CGGCC	CCGCC	CGGCC	16	699	191	0.0837696
CGGCC|GCCCC	GCCCC	CGGCC	16	541	191	0.0837696
CCCCC|CTCCC	CCCCC	CTCCC	37	646	442	0.0837104
CCCCC|GCGCC	CCCCC	GCGCC	20	646	239	0.083682
GCCCC|GCGCC	GCCCC	GCGCC	20	541	239	0.083682
CCGCC|CGCCG	CCGCC	CGCCG	23	699	275	0.0836364
CCCCT|CGCCA	CCCCT	CGCCA	26	408	311	0.0836013
CGCCA|CTCCC	CTCCC	CGCCA	26	442	311	0.0836013
CACCC|CCCCG	CACCC	CCCCG	39	632	467	0.0835118
CCCCG|CGCCC	CGCCC	CCCCG	39	697	467	0.0835118
CCCCG|GCCCC	GCCCC	CCCCG	39	541	467	0.0835118
CACAC|GGCCC	CACAC	GGCCC	14	353	168	0.0833333
CACCA|GGCGC	CACCA	GGCGC	9	288	108	0.0833333
AACAC|CACCC	CACCC	AACAC	13	632	156	0.0833333
CACCC|TCCTC	CACCC	TCCTC	10	632	120	0.0833333
ACCCT|CCACC	CCACC	ACCCT	17	737	204	0.0833333
AACGC|CCCAC	CCCAC	AACGC	11	679	132	0.0833333
CCCAC|CCGCT	CCCAC	CCGCT	15	679	180	0.0833333
ACCCT|CCCCC	CCCCC	ACCCT	17	646	204	0.0833333
CACCA|CCCCC	CCCCC	CACCA	24	646	288	0.0833333
CCCTG|GGCGC	CCCTG	GGCGC	9	164	108	0.0833333
AACGC|CCGCC	CCGCC	AACGC	11	699	132	0.0833333
CGCAC|TCCTC	CGCAC	TCCTC	10	333	120	0.0833333
CGCCC|TCCTC	CGCCC	TCCTC	10	697	120	0.0833333
AACGC|GAGGA	GAGGA	AACGC	11	303	132	0.0833333
ACCCT|GCCCC	GCCCC	ACCCT	17	541	204	0.0833333
AACGC|GGAGG	GGAGG	AACGC	11	371	132	0.0833333
CCCCC|GCCCC	CCCCC	GCCCC	45	646	541	0.0831793
CCCCA|CCCGC	CCCGC	CCCCA	39	628	469	0.0831557
CACGC|CCCCA	CCCCA	CACGC	30	469	361	0.0831025
ACCAC|CCGCC	CCGCC	ACCAC	27	699	325	0.0830769
CCCTC|CCTCC	CCTCC	CCCTC	46	511	554	0.0830325
ACCCG|CACCC	CACCC	ACCCG	20	632	241	0.0829876
ACCCG|CCTCC	CCTCC	ACCCG	20	511	241	0.0829876
CACCT|CCCCA	CCCCA	CACCT	19	469	229	0.0829694
CCCGC|CCTCA	CCCGC	CCTCA	19	628	229	0.0829694
CACCT|CTCCC	CTCCC	CACCT	19	442	229	0.0829694
CCACC|CCGTC	CCACC	CCGTC	18	737	217	0.0829493
CCCGC|CGCCC	CGCCC	CCCGC	52	697	628	0.0828025
CGACG|GCCCC	GCCCC	CGACG	12	541	145	0.0827586
CACCC|GCGAC	CACCC	GCGAC	11	632	133	0.0827068
CACCG|CCTCT	CACCG	CCTCT	11	329	133	0.0827068
CCGCC|CCTCT	CCGCC	CCTCT	11	699	133	0.0827068
GCCCC|GCGAC	GCCCC	GCGAC	11	541	133	0.0827068
CACCC|CCCAG	CACCC	CCCAG	10	632	121	0.0826446
CCCAG|CCTCC	CCTCC	CCCAG	10	511	121	0.0826446
ACCCC|ACCTC	ACCCC	ACCTC	19	463	230	0.0826087
CACCC|GCACC	CACCC	GCACC	21	632	255	0.0823529
ACACG|CCCCG	CCCCG	ACACG	14	467	170	0.0823529
CACAC|CCCAC	CCCAC	CACAC	29	679	353	0.082153
ATCCC|CCCCA	CCCCA	ATCCC	11	469	134	0.0820896
ATCCC|CTCCC	CTCCC	ATCCC	11	442	134	0.0820896
ATCCC|GCCCC	GCCCC	ATCCC	11	541	134	0.0820896
ACCCC|CCTCC	CCTCC	ACCCC	38	511	463	0.0820734
ACGCA|CCACC	CCACC	ACGCA	15	737	183	0.0819672
CCCAA|GCCCC	GCCCC	CCCAA	14	541	171	0.0818713
CCCCA|CGCGC	CCCCA	CGCGC	27	469	330	0.0818182
CCCCA|TCCCC	CCCCA	TCCCC	27	469	330	0.0818182
ACTCC|GACCT	ACTCC	GACCT	8	173	98	0.0816327
CACAG|CCACC	CCACC	CACAG	8	737	98	0.0816327
CAACA|CCCCA	CCCCA	CAACA	12	469	147	0.0816327
CACAG|CCGCC	CCGCC	CACAG	8	699	98	0.0816327
CTCCC|GACCT	CTCCC	GACCT	8	442	98	0.0816327
CAACA|GAGGA	GAGGA	CAACA	12	303	147	0.0816327
CCGCC|CCTCC	CCTCC	CCGCC	57	511	699	0.0815451
CCCCG|CCTAC	CCCCG	CCTAC	15	467	184	0.0815217
GCACG|GCCCC	GCCCC	GCACG	11	541	135	0.0814815
ACCCC|CTCCA	ACCCC	CTCCA	14	463	172	0.0813953
CGCCC|CTCCA	CGCCC	CTCCA	14	697	172	0.0813953
CCCCC|CCCCG	CCCCC	CCCCG	38	646	467	0.0813704
CCCTC|GCCCC	CCCTC	GCCCC	44	554	541	0.0813309
CCGCC|GCCCC	CCGCC	GCCCC	44	699	541	0.0813309
CCTCC|GCCCC	CCTCC	GCCCC	44	511	541	0.0813309
CACCC|CTCTC	CACCC	CTCTC	10	632	123	0.0813008
CAACG|CCCAC	CCCAC	CAACG	10	679	123	0.0813008
CCCCT|CTCCT	CCCCT	CTCCT	10	408	123	0.0813008
CCCGC|CTCTC	CCCGC	CTCTC	10	628	123	0.0813008
CCCTC|CTCTC	CCCTC	CTCTC	10	554	123	0.0813008
CAACG|CCGCC	CCGCC	CAACG	10	699	123	0.0813008
CCTCC|CTCTC	CCTCC	CTCTC	10	511	123	0.0813008
CACGA|CGCCC	CGCCC	CACGA	10	697	123	0.0813008
CTCCC|CTCTC	CTCCC	CTCTC	10	442	123	0.0813008
CACGA|GCCCC	GCCCC	CACGA	10	541	123	0.0813008
CCCAC|CTACC	CCCAC	CTACC	13	679	160	0.08125
CTACC|CTCCC	CTCCC	CTACC	13	442	160	0.08125
CAACC|CACCC	CACCC	CAACC	19	632	234	0.0811966
ACCAA|CACCC	CACCC	ACCAA	9	632	111	0.0810811
CCACC|CCACG	CCACC	CCACG	24	737	296	0.0810811
CCACC|CGCAC	CCACC	CGCAC	27	737	333	0.0810811
CCACC|GCACA	CCACC	GCACA	12	737	148	0.0810811
CCACC|GCGCA	CCACC	GCGCA	9	737	111	0.0810811
CCCAC|GCGCA	CCCAC	GCGCA	9	679	111	0.0810811
CCACG|CCCCA	CCCCA	CCACG	24	469	296	0.0810811
CCACG|CCCCC	CCCCC	CCACG	24	646	296	0.0810811
CCCCC|TCCCG	CCCCC	TCCCG	12	646	148	0.0810811
ACACT|CCCGC	CCCGC	ACACT	9	628	111	0.0810811
ACCAA|CCCGC	CCCGC	ACCAA	9	628	111	0.0810811
CCACG|CCCGC	CCCGC	CCACG	24	628	296	0.0810811
CCCGC|TCCCG	CCCGC	TCCCG	12	628	148	0.0810811
CCTCC|TCCCG	CCTCC	TCCCG	12	511	148	0.0810811
CCCCA|CCCCC	CCCCC	CCCCA	38	646	469	0.0810235
CCCCA|CCCCT	CCCCT	CCCCA	38	408	469	0.0810235
ACTCC|CCCTC	CCCTC	ACTCC	14	554	173	0.0809249
CCCCC|CCCCT	CCCCC	CCCCT	33	646	408	0.0808824
CACTC|CCACC	CCACC	CACTC	16	737	198	0.0808081
CCACC|CCTGC	CCACC	CCTGC	16	737	198	0.0808081
CCACC|TCGAC	CCACC	TCGAC	8	737	99	0.0808081
CACTC|CCCCC	CCCCC	CACTC	16	646	198	0.0808081
CACTC|CCCTC	CCCTC	CACTC	16	554	198	0.0808081
CCGCC|TCGAC	CCGCC	TCGAC	8	699	99	0.0808081
CACTC|CCTCC	CCTCC	CACTC	16	511	198	0.0808081
CGACC|TCGAC	CGACC	TCGAC	8	301	99	0.0808081
CACTC|CTCCC	CTCCC	CACTC	16	442	198	0.0808081
CCTCC|CTCAC	CCTCC	CTCAC	21	511	260	0.0807692
CCCCC|CCGGC	CCCCC	CCGGC	15	646	186	0.0806452
CCGCC|CCGGC	CCGCC	CCGGC	15	699	186	0.0806452
CACCC|CTCGC	CACCC	CTCGC	19	632	236	0.0805085
CAGCC|CCCAC	CCCAC	CAGCC	14	679	174	0.0804598
AACCC|CCCGC	CCCGC	AACCC	14	628	174	0.0804598
CAGCC|CTCCC	CTCCC	CAGCC	14	442	174	0.0804598
AACCC|TCACC	TCACC	AACCC	14	214	174	0.0804598
CCTCC|CGCCA	CCTCC	CGCCA	25	511	311	0.0803859
CCGCC|CGCCC	CCGCC	CGCCC	56	699	697	0.0803443
CACCC|CACGC	CACCC	CACGC	29	632	361	0.0803324
CACGC|CCCGG	CACGC	CCCGG	11	361	137	0.080292
CCCCG|CCCGG	CCCCG	CCCGG	11	467	137	0.080292
CCCTC|CCGCC	CCCTC	CCGCC	56	554	699	0.0801144
CCGCC|CGCCC	CGCCC	CCGCC	56	697	699	0.0801144
CCGCC|CTCCC	CTCCC	CCGCC	56	442	699	0.0801144
CCACC|CCTCC	CCTCC	CCACC	59	511	737	0.0800543
ACCCC|TCACG	ACCCC	TCACG	8	463	100	0.08
ACCGC|GACCC	ACCGC	GACCC	16	318	200	0.08
CCCCA|CTGCC	CCCCA	CTGCC	14	469	175	0.08
CCCCG|TCACG	CCCCG	TCACG	8	467	100	0.08
ACCAC|CCCTC	CCCTC	ACCAC	26	554	325	0.08
CCGCC|TCCCA	CCGCC	TCCCA	10	699	125	0.08
GCCCC|TCACG	GCCCC	TCACG	8	541	100	0.08
CACCA|CCACC	CCACC	CACCA	23	737	288	0.0798611
CACCA|CCCAC	CCCAC	CACCA	23	679	288	0.0798611
CACCA|CCCTC	CCCTC	CACCA	23	554	288	0.0798611
ACACC|CCGCC	CCGCC	ACACC	23	699	288	0.0798611
CACCA|CGCCC	CGCCC	CACCA	23	697	288	0.0798611
ACACA|AGAGG	ACACA	AGAGG	9	177	113	0.079646
CCCCC|CGCTC	CCCCC	CGCTC	18	646	226	0.079646
CCCGC|CGCTC	CCCGC	CGCTC	18	628	226	0.079646
ACCCA|CCCTC	CCCTC	ACCCA	18	554	226	0.079646
CATCC|CCCCC	CCCCC	CATCC	14	646	176	0.0795455
CATCC|CTCCC	CTCCC	CATCC	14	442	176	0.0795455
CCGCC|GCGCC	CCGCC	GCGCC	19	699	239	0.0794979
CACCC|GCCCC	CACCC	GCCCC	43	632	541	0.0794824
CCCAC|GCCCC	CCCAC	GCCCC	43	679	541	0.0794824
CCCCA|CCCTC	CCCCA	CCCTC	44	469	554	0.0794224
CCCCA|CCGAC	CCCCA	CCGAC	22	469	277	0.0794224
CCGAC|CCGCC	CCGCC	CCGAC	22	699	277	0.0794224
CCCTC|GCCCC	GCCCC	CCCTC	44	541	554	0.0794224
CCCAC|TCGCC	CCCAC	TCGCC	15	679	189	0.0793651
CCCTC|CGCAA	CCCTC	CGCAA	10	554	126	0.0793651
CCTCC|CGCAA	CCTCC	CGCAA	10	511	126	0.0793651
CGCAA|CTCCC	CTCCC	CGCAA	10	442	126	0.0793651
GCCCC|TCGCC	GCCCC	TCGCC	15	541	189	0.0793651
ACACC|CCCTG	ACACC	CCCTG	13	288	164	0.0792683
CCCTG|CGCCC	CGCCC	CCCTG	13	697	164	0.0792683
CCCGC|GCCCT	CCCGC	GCCCT	16	628	202	0.0792079
CACCC|CTCCC	CACCC	CTCCC	35	632	442	0.0791855
CCTCC|CTCCC	CCTCC	CTCCC	35	511	442	0.0791855
CACCC|CCTTC	CACCC	CCTTC	11	632	139	0.0791367
CCACC|CCTTC	CCACC	CCTTC	11	737	139	0.0791367
CCCGC|CCTTC	CCCGC	CCTTC	11	628	139	0.0791367
CCTTC|CGCCA	CGCCA	CCTTC	11	311	139	0.0791367
CACCC|TCCGC	CACCC	TCCGC	14	632	177	0.079096
CCTCC|TCCGC	CCTCC	TCCGC	14	511	177	0.079096
CACCG|CCCTC	CCCTC	CACCG	26	554	329	0.0790274
CCCCT|CTTCC	CCCCT	CTTCC	9	408	114	0.0789474
CGCCA|CTTCC	CGCCA	CTTCC	9	311	114	0.0789474
CTTCC|GCCTC	GCCTC	CTTCC	9	194	114	0.0789474
CCCCA|CCTCC	CCTCC	CCCCA	37	511	469	0.0788913
ACCCG|CACCG	CACCG	ACCCG	19	329	241	0.0788382
ACCCC|CCACC	ACCCC	CCACC	58	463	737	0.0786974
CCTCA|CCTCC	CCTCC	CCTCA	18	511	229	0.0786026
CACCC|CGGCC	CACCC	CGGCC	15	632	191	0.078534
CCACC|CGGCC	CCACC	CGGCC	15	737	191	0.078534
ACCCT|CACCC	CACCC	ACCCT	16	632	204	0.0784314
ACCCT|CCTCC	CCTCC	ACCCT	16	511	204	0.0784314
CCCCT|CCTCC	CCTCC	CCCCT	32	511	408	0.0784314
CCTCC|GCCCA	CCTCC	GCCCA	20	511	255	0.0784314
CCACC|GCCGC	CCACC	GCCGC	21	737	268	0.0783582
CCCGC|GCCGC	CCCGC	GCCGC	21	628	268	0.0783582
CCGCC|GCCGC	CCGCC	GCCGC	21	699	268	0.0783582
ACCCC|GCTCC	ACCCC	GCTCC	13	463	166	0.0783133
ACGCG|CCCAC	CCCAC	ACGCG	13	679	166	0.0783133
ACGCG|CCCCC	CCCCC	ACGCG	13	646	166	0.0783133
CCCCC|GCTCC	CCCCC	GCTCC	13	646	166	0.0783133
ACCTC|CACCC	CACCC	ACCTC	18	632	230	0.0782609
CACCC|CGCGT	CACCC	CGCGT	9	632	115	0.0782609
ACCTC|CCCCA	CCCCA	ACCTC	18	469	230	0.0782609
ACGCC|CACCC	CACCC	ACGCC	23	632	294	0.0782313
ACGCC|CCGCC	CCGCC	ACGCC	23	699	294	0.0782313
CACCC|CCCAC	CACCC	CCCAC	53	632	679	0.078056
CCACC|CCCAC	CCACC	CCCAC	53	737	679	0.078056
CCCCC|GCCCG	CCCCC	GCCCG	20	646	257	0.077821
ACCCC|CCCTC	CCCTC	ACCCC	36	554	463	0.0777538
CCCGC|CGCCT	CCCGC	CGCCT	16	628	206	0.0776699
CCGCC|CGCCT	CCGCC	CGCCT	16	699	206	0.0776699
ACCCC|GCCCC	ACCCC	GCCCC	42	463	541	0.077634
CCCGC|GCCCC	CCCGC	GCCCC	42	628	541	0.077634
CTCCC|GCCCC	CTCCC	GCCCC	42	442	541	0.077634
CACGC|GCCCC	GCCCC	CACGC	28	541	361	0.0775623
CACCC|CCCCC	CCCCC	CACCC	49	646	632	0.0775316
CCCAC|GCAAC	CCCAC	GCAAC	10	679	129	0.0775194
CTCCC|GCAAC	CTCCC	GCAAC	10	442	129	0.0775194
CGCCC|CTCCC	CTCCC	CGCCC	54	442	697	0.0774749
CCCTA|CCTCC	CCTCC	CCCTA	12	511	155	0.0774194
CCCTC|GGCCC	CCCTC	GGCCC	13	554	168	0.077381
CCCCC|GCCTC	CCCCC	GCCTC	15	646	194	0.0773196
CCCGC|GCCTC	CCCGC	GCCTC	15	628	194	0.0773196
CCCTC|GCCTC	CCCTC	GCCTC	15	554	194	0.0773196
CCGCC|GCCTC	CCGCC	GCCTC	15	699	194	0.0773196
GCCCC|GCCTC	GCCCC	GCCTC	15	541	194	0.0773196
AACAC|AAGGA	AAGGA	AACAC	12	299	156	0.0769231
ACCCC|CAACC	ACCCC	CAACC	18	463	234	0.0769231
ACCCC|CCCTT	ACCCC	CCCTT	11	463	143	0.0769231
ACCCC|CGACA	ACCCC	CGACA	10	463	130	0.0769231
ACCCC|CTCCC	ACCCC	CTCCC	34	463	442	0.0769231
ACGCC|TACCC	ACGCC	TACCC	10	294	130	0.0769231
AGGAG|GGAAC	AGGAG	GGAAC	7	349	91	0.0769231
CACCC|CCCTT	CACCC	CCCTT	11	632	143	0.0769231
CACCC|CGTCC	CACCC	CGTCC	15	632	195	0.0769231
CACCC|TACCC	CACCC	TACCC	10	632	130	0.0769231
ACCAC|CCACC	CCACC	ACCAC	25	737	325	0.0769231
CCACG|CCCAT	CCACG	CCCAT	10	296	130	0.0769231
CCCAC|CGACA	CCCAC	CGACA	10	679	130	0.0769231
CCCAC|CTCCC	CCCAC	CTCCC	34	679	442	0.0769231
CCCAC|TACCC	CCCAC	TACCC	10	679	130	0.0769231
ACGAC|CCCCG	CCCCG	ACGAC	11	467	143	0.0769231
ACGAC|CCCGC	CCCGC	ACGAC	11	628	143	0.0769231
CCCAT|CCCGC	CCCGC	CCCAT	10	628	130	0.0769231
CCCGC|CCCTT	CCCGC	CCCTT	11	628	143	0.0769231
CCCGC|CGTCC	CCCGC	CGTCC	15	628	195	0.0769231
CCCTC|CGACA	CCCTC	CGACA	10	554	130	0.0769231
CCCTC|CTCAC	CCCTC	CTCAC	20	554	260	0.0769231
CGACA|CGACC	CGACC	CGACA	10	301	130	0.0769231
CCCTT|CGCCA	CGCCA	CCCTT	11	311	143	0.0769231
CGACA|CGCCC	CGCCC	CGACA	10	697	130	0.0769231
CGTCC|CTCCC	CTCCC	CGTCC	15	442	195	0.0769231
AACAC|GAGGA	GAGGA	AACAC	12	303	156	0.0769231
CTCAC|GCCAC	GCCAC	CTCAC	20	333	260	0.0769231
CGACA|GCCCC	GCCCC	CGACA	10	541	130	0.0769231
GGAGG|TGCAC	GGAGG	TGCAC	7	371	91	0.0769231
CCCAC|CCCTC	CCCTC	CCCAC	52	554	679	0.0765832
ACGCA|AGGAG	AGGAG	ACGCA	14	349	183	0.0765027
ACGCA|GAGGA	GAGGA	ACGCA	14	303	183	0.0765027
CACAC|CCACC	CCACC	CACAC	27	737	353	0.0764873
CCCCA|GCGCG	CCCCA	GCGCG	12	469	157	0.0764331
GCCCC|GCGCG	GCCCC	GCGCG	12	541	157	0.0764331
CCCCA|TCCCT	CCCCA	TCCCT	11	469	144	0.0763889
ACACC|CCCGC	CCCGC	ACACC	22	628	288	0.0763889
ACACC|CCCTC	CCCTC	ACACC	22	554	288	0.0763889
CCGCC|CGCGA	CCGCC	CGCGA	11	699	144	0.0763889
CGCCC|CGCGA	CGCCC	CGCGA	11	697	144	0.0763889
CGCGA|GCCCC	GCCCC	CGCGA	11	541	144	0.0763889
TCCCC|TCCCT	TCCCC	TCCCT	11	330	144	0.0763889
CCACC|CGCCG	CCACC	CGCCG	21	737	275	0.0763636
CCCCA|CGCCG	CCCCA	CGCCG	21	469	275	0.0763636
ACCCC|GACCA	ACCCC	GACCA	9	463	118	0.0762712
CCCCC|TACAC	CCCCC	TACAC	9	646	118	0.0762712
CCCCT|GACCA	CCCCT	GACCA	9	408	118	0.0762712
CCGCC|CTCGC	CCGCC	CTCGC	18	699	236	0.0762712
GAGGA|TACAC	GAGGA	TACAC	9	303	118	0.0762712
GCCCC|TACAC	GCCCC	TACAC	9	541	118	0.0762712
GGAGG|TACAC	GGAGG	TACAC	9	371	118	0.0762712
ACCAC|GGCAC	ACCAC	GGCAC	8	325	105	0.0761905
CAACC|GGCAC	CAACC	GGCAC	8	234	105	0.0761905
CCGCC|GGCAC	CCGCC	GGCAC	8	699	105	0.0761905
CGCCC|GGCAC	CGCCC	GGCAC	8	697	105	0.0761905
ACCAC|GCCAA	ACCAC	GCCAA	7	325	92	0.076087
CCCGC|GCCAA	CCCGC	GCCAA	7	628	92	0.076087
CCTAC|CGCCC	CGCCC	CCTAC	14	697	184	0.076087
GCCAA|GCCCC	GCCCC	GCCAA	7	541	92	0.076087
CACCC|CACCG	CACCC	CACCG	25	632	329	0.0759878
CACCC|CCTCC	CCTCC	CACCC	48	511	632	0.0759494
CACCC|CGACG	CACCC	CGACG	11	632	145	0.0758621
CCCAC|CGACG	CCCAC	CGACG	11	679	145	0.0758621
CACCC|CCCCC	CACCC	CCCCC	49	632	646	0.0758514
ACCCC|CCGCC	ACCCC	CCGCC	53	463	699	0.0758226
CCCGC|CCGCC	CCCGC	CCGCC	53	628	699	0.0758226
GCCCC|TCCCC	TCCCC	GCCCC	41	330	541	0.0757856
CCACC|CGCGC	CCACC	CGCGC	25	737	330	0.0757576
CCCCA|CCTGC	CCCCA	CCTGC	15	469	198	0.0757576
CCCCG|TCCAC	CCCCG	TCCAC	15	467	198	0.0757576
CCGCC|CGCGC	CCGCC	CGCGC	25	699	330	0.0757576
CTCCC|TCCCC	CTCCC	TCCCC	25	442	330	0.0757576
ACACC|GTCCC	ACACC	GTCCC	9	288	119	0.0756303
CCCTC|GTCCC	CCCTC	GTCCC	9	554	119	0.0756303
CGCCC|GTCCC	CGCCC	GTCCC	9	697	119	0.0756303
CTCCC|GTCCC	CTCCC	GTCCC	9	442	119	0.0756303
ACCCC|CCCCG	CCCCG	ACCCC	35	467	463	0.075594
CCCTC|CTCCA	CCCTC	CTCCA	13	554	172	0.0755814
CACAA|CCCCC	CCCCC	CACAA	8	646	106	0.0754717
CCCCC|CGTCG	CCCCC	CGTCG	8	646	106	0.0754717
CCCCG|CGAAC	CCCCG	CGAAC	8	467	106	0.0754717
CCTCC|CGTCG	CCTCC	CGTCG	8	511	106	0.0754717
CCGCA|CGCCC	CGCCC	CCGCA	20	697	265	0.0754717
AGGAG|ATCAC	AGGAG	ATCAC	7	349	93	0.0752688
ATCAC|CACCC	CACCC	ATCAC	7	632	93	0.0752688
ATCAC|CCCAC	CCCAC	ATCAC	7	679	93	0.0752688
CCGGC|CGCAC	CGCAC	CCGGC	14	333	186	0.0752688
CCGGC|CGCCC	CGCCC	CCGGC	14	697	186	0.0752688
ATCAC|CGCCC	CGCCC	ATCAC	7	697	93	0.0752688
ATCAC|GAGGA	GAGGA	ATCAC	7	303	93	0.0752688
ACCCA|ACCCC	ACCCC	ACCCA	17	463	226	0.0752212
CACCC|CGCTC	CACCC	CGCTC	17	632	226	0.0752212
CACCC|CCTCT	CACCC	CCTCT	10	632	133	0.075188
CCCCA|CCTCT	CCCCA	CCTCT	10	469	133	0.075188
CCCGC|CCTCT	CCCGC	CCTCT	10	628	133	0.075188
CCCTC|CCTCT	CCCTC	CCTCT	10	554	133	0.075188
CCGCC|GCGAC	CCGCC	GCGAC	10	699	133	0.075188
ACTCC|CCCCA	CCCCA	ACTCC	13	469	173	0.0751445
ACTCC|CCCCG	CCCCG	ACTCC	13	467	173	0.0751445
ACTCC|GCCCC	GCCCC	ACTCC	13	541	173	0.0751445
CCTCC|GCCAC	CCTCC	GCCAC	25	511	333	0.0750751
CCCCT|CTACC	CCCCT	CTACC	12	408	160	0.075
GACCC|GCCCC	GCCCC	GACCC	15	541	200	0.075
CTACC|TCCCC	TCCCC	CTACC	12	330	160	0.075
ACCCC|CCCCG	ACCCC	CCCCG	35	463	467	0.0749465
ACACC|CCAGC	ACACC	CCAGC	11	288	147	0.0748299
ACCCA|CCAGC	ACCCA	CCAGC	11	226	147	0.0748299
ACCCC|CCAGC	ACCCC	CCAGC	11	463	147	0.0748299
CCAGC|CGCCC	CGCCC	CCAGC	11	697	147	0.0748299
CCAGC|GCCCC	GCCCC	CCAGC	11	541	147	0.0748299
ACCCC|TCACC	ACCCC	TCACC	16	463	214	0.0747664
ACGGC|CCCCC	CCCCC	ACGGC	8	646	107	0.0747664
ACGGC|CCCCG	CCCCG	ACGGC	8	467	107	0.0747664
ACCGA|CCCGC	CCCGC	ACCGA	8	628	107	0.0747664
ACGGC|CCCGC	CCCGC	ACGGC	8	628	107	0.0747664
ACCGA|CCGCC	CCGCC	ACCGA	8	699	107	0.0747664
ACGGC|CCGCC	CCGCC	ACGGC	8	699	107	0.0747664
ACGGC|CCGCG	CCGCG	ACGGC	8	283	107	0.0747664
ACGGC|GCCCC	GCCCC	ACGGC	8	541	107	0.0747664
AACCC|CCCAC	CCCAC	AACCC	13	679	174	0.0747126
AACCC|CCCCG	CCCCG	AACCC	13	467	174	0.0747126
AACCC|CGCCC	CGCCC	AACCC	13	697	174	0.0747126
ACCCG|ACCGC	ACCGC	ACCCG	18	318	241	0.0746888
CCCAC|CCCCA	CCCAC	CCCCA	35	679	469	0.0746269
CCACC|CCCCC	CCCCC	CCACC	55	646	737	0.0746269
ATCCC|CGCCC	CGCCC	ATCCC	10	697	134	0.0746269
CCCGC|CGCCC	CCCGC	CGCCC	52	628	697	0.0746055
CCCTC|GACAC	CCCTC	GACAC	12	554	161	0.0745342
GACAC|GGAGG	GGAGG	GACAC	12	371	161	0.0745342
CCCGC|GCACC	CCCGC	GCACC	19	628	255	0.0745098
GCCCA|GCCCC	GCCCC	GCCCA	19	541	255	0.0745098
CCCAC|GACCG	CCCAC	GACCG	9	679	121	0.0743802
CCGCC|GACCG	CCGCC	GACCG	9	699	121	0.0743802
ACCCC|CCTCC	ACCCC	CCTCC	38	463	511	0.074364
CCACG|CCCTC	CCCTC	CCACG	22	554	296	0.0743243
CCGCC|GCACA	CCGCC	GCACA	11	699	148	0.0743243
CGCCC|GCACA	CGCCC	GCACA	11	697	148	0.0743243
GCCCC|TCCCG	GCCCC	TCCCG	11	541	148	0.0743243
CCCCC|CCGCC	CCGCC	CCCCC	48	699	646	0.0743034
CCCTC|GCCCT	CCCTC	GCCCT	15	554	202	0.0742574
CCGCC|GCCCT	CCGCC	GCCCT	15	699	202	0.0742574
CTCCC|GCCCT	CTCCC	GCCCT	15	442	202	0.0742574
GCCCC|GCCCT	GCCCC	GCCCT	15	541	202	0.0742574
GCCCT|TCCCC	TCCCC	GCCCT	15	330	202	0.0742574
ACCCC|CCTCA	ACCCC	CCTCA	17	463	229	0.0742358
CCCCC|CCTCA	CCCCC	CCTCA	17	646	229	0.0742358
CACCT|CCTCC	CCTCC	CACCT	17	511	229	0.0742358
CACCC|GCACG	CACCC	GCACG	10	632	135	0.0740741
CCCAC|GCACG	CCCAC	GCACG	10	679	135	0.0740741
CCCTC|GCACG	CCCTC	GCACG	10	554	135	0.0740741
GAGGA|GGCGC	GAGGA	GGCGC	8	303	108	0.0740741
GCCAC|GCCGA	GCCAC	GCCGA	8	333	108	0.0740741
GCCAC|GGCGC	GCCAC	GGCGC	8	333	108	0.0740741
ACCTC|TCCCC	TCCCC	ACCTC	17	330	230	0.073913
CCACC|CCACT	CCACC	CCACT	15	737	203	0.0738916
ACCAC|CGCCC	CGCCC	ACCAC	24	697	325	0.0738462
CCACA|CCGCC	CCGCC	CCACA	20	699	271	0.0738007
CCGTC|CCTCC	CCTCC	CCGTC	16	511	217	0.0737327
ACATC|CCCAC	CCCAC	ACATC	7	679	95	0.0736842
CCGGC|CTGAC	CCGGC	CTGAC	7	186	95	0.0736842
AGCCC|CCCAC	CCCAC	AGCCC	12	679	163	0.0736196
AGCCC|GCCCC	GCCCC	AGCCC	12	541	163	0.0736196
ACCCT|CCCAC	CCCAC	ACCCT	15	679	204	0.0735294
CCCCC|CCCGA	CCCCC	CCCGA	15	646	204	0.0735294
ACCCT|CCCCT	CCCCT	ACCCT	15	408	204	0.0735294
ACCCT|CCCGC	CCCGC	ACCCT	15	628	204	0.0735294
CCCCT|TCCGC	CCCCT	TCCGC	13	408	177	0.0734463
CCCTC|TCCGC	CCCTC	TCCGC	13	554	177	0.0734463
CTCCC|TCCGC	CTCCC	TCCGC	13	442	177	0.0734463
GCCCC|TCCGC	GCCCC	TCCGC	13	541	177	0.0734463
ACCCC|CCCCA	CCCCA	ACCCC	34	469	463	0.0734341
ACCCC|CTCCC	CTCCC	ACCCC	34	442	463	0.0734341
ACCCC|TCCCC	TCCCC	ACCCC	34	330	463	0.0734341
CCCAC|CGGCC	CCCAC	CGGCC	14	679	191	0.0732984
CCCGT|CCTCC	CCTCC	CCCGT	14	511	191	0.0732984
CCCCC|CCCGC	CCCCC	CCCGC	46	646	628	0.0732484
CACAC|CTCCT	CACAC	CTCCT	9	353	123	0.0731707
CACCA|CCCTG	CACCA	CCCTG	12	288	164	0.0731707
CACGC|CTCCT	CACGC	CTCCT	9	361	123	0.0731707
CCCAC|CTCCT	CCCAC	CTCCT	9	679	123	0.0731707
CCCCA|CCCTG	CCCCA	CCCTG	12	469	164	0.0731707
CAACG|CCCCG	CCCCG	CAACG	9	467	123	0.0731707
CAACG|CCCGC	CCCGC	CAACG	9	628	123	0.0731707
CACGA|CCCGC	CCCGC	CACGA	9	628	123	0.0731707
CCCGC|CTCCT	CCCGC	CTCCT	9	628	123	0.0731707
CGCAC|CTCCT	CGCAC	CTCCT	9	333	123	0.0731707
CAACG|CGCCC	CGCCC	CAACG	9	697	123	0.0731707
CGCCC|CTCCT	CGCCC	CTCCT	9	697	123	0.0731707
CAACG|GCCCC	GCCCC	CAACG	9	541	123	0.0731707
CTCCT|GCCCC	GCCCC	CTCCT	9	541	123	0.0731707
CTCTC|GCCCC	GCCCC	CTCTC	9	541	123	0.0731707
CCCGC|CTCAC	CCCGC	CTCAC	19	628	260	0.0730769
CCCGG|CCGCC	CCGCC	CCCGG	10	699	137	0.0729927
CCCGG|GCCCC	GCCCC	CCCGG	10	541	137	0.0729927
ACACC|CCCAC	CCCAC	ACACC	21	679	288	0.0729167
ACACC|CCCCG	CCCCG	ACACC	21	467	288	0.0729167
CACCA|CCCCG	CCCCG	CACCA	21	467	288	0.0729167
CACCA|CTCCC	CTCCC	CACCA	21	442	288	0.0729167
CCCCC|CGCCT	CCCCC	CGCCT	15	646	206	0.0728155
CCCTC|CGCCT	CCCTC	CGCCT	15	554	206	0.0728155
CGCCT|GCCCC	GCCCC	CGCCT	15	541	206	0.0728155
CCCCG|CCCTC	CCCTC	CCCCG	34	554	467	0.0728051
CCCCG|CCGCC	CCGCC	CCCCG	34	699	467	0.0728051
AACAC|GGAGG	AACAC	GGAGG	27	156	371	0.0727763
ACCCC|CGCGC	ACCCC	CGCGC	24	463	330	0.0727273
CCCGC|TCCCC	CCCGC	TCCCC	24	628	330	0.0727273
CCGCC|TCCCC	CCGCC	TCCCC	24	699	330	0.0727273
ACCCC|CCCCA	ACCCC	CCCCA	34	463	469	0.0724947
CCCCA|GCCCC	GCCCC	CCCCA	34	541	469	0.0724947
CACCC|CCTCG	CACCC	CCTCG	15	632	207	0.0724638
CACGC|CCTCG	CACGC	CCTCG	15	361	207	0.0724638
CCCCA|CCTCC	CCCCA	CCTCC	37	469	511	0.072407
CCCCA|CTCCC	CCCCA	CTCCC	32	469	442	0.0723982
ACGCC|GCTCC	ACGCC	GCTCC	12	294	166	0.0722892
CCCGC|GCTCC	CCCGC	GCTCC	12	628	166	0.0722892
CCCTC|GCTCC	CCCTC	GCTCC	12	554	166	0.0722892
CCTCC|TGCCC	CCTCC	TGCCC	12	511	166	0.0722892
CGCCC|GCTCC	CGCCC	GCTCC	12	697	166	0.0722892
CGCCG|GCTCC	CGCCG	GCTCC	12	275	166	0.0722892
GCTCC|TCCCC	TCCCC	GCTCC	12	330	166	0.0722892
TCCCC|TGCCC	TCCCC	TGCCC	12	330	166	0.0722892
CCCCC|CCGCT	CCCCC	CCGCT	13	646	180	0.0722222
CCCGC|CCGAC	CCCGC	CCGAC	20	628	277	0.0722022
CCCTC|CTCCC	CTCCC	CCCTC	40	442	554	0.0722022
ACCCC|GCCTC	ACCCC	GCCTC	14	463	194	0.0721649
CCCCG|GCCCC	CCCCG	GCCCC	39	467	541	0.0720887
AGGAA|GCGCA	AGGAA	GCGCA	8	128	111	0.0720721
ACACT|CACCC	CACCC	ACACT	8	632	111	0.0720721
ACCAA|CCCAC	CCCAC	ACCAA	8	679	111	0.0720721
ACCAA|CCCCA	CCCCA	ACCAA	8	469	111	0.0720721
CCCCA|GCGCA	CCCCA	GCGCA	8	469	111	0.0720721
CCCCC|GCGCA	CCCCC	GCGCA	8	646	111	0.0720721
ACACT|CCGCC	CCGCC	ACACT	8	699	111	0.0720721
CCGCC|GCCAC	CCGCC	GCCAC	24	699	333	0.0720721
ACACT|GAGGG	GAGGG	ACACT	8	127	111	0.0720721
ACCCC|TCCCA	ACCCC	TCCCA	9	463	125	0.072
ACCGC|TCCCA	ACCGC	TCCCA	9	318	125	0.072
CCCAC|TCCCA	CCCAC	TCCCA	9	679	125	0.072
CCAAC|CCTCC	CCTCC	CCAAC	18	511	250	0.072
CGCCA|TCCCA	CGCCA	TCCCA	9	311	125	0.072
CCACC|CCCAC	CCCAC	CCACC	53	679	737	0.0719132
CCCCA|CTCCG	CCCCA	CTCCG	12	469	167	0.0718563
CCCCT|CTCCG	CCCCT	CTCCG	12	408	167	0.0718563
CCGCC|CTCCG	CCGCC	CTCCG	12	699	167	0.0718563
CTCCC|CTCCG	CTCCC	CTCCG	12	442	167	0.0718563
CGCCC|CGTCC	CGCCC	CGTCC	14	697	195	0.0717949
CGTCC|GCCCC	GCCCC	CGTCC	14	541	195	0.0717949
CACCC|CCGCA	CACCC	CCGCA	19	632	265	0.0716981
ACACC|GGCCC	ACACC	GGCCC	12	288	168	0.0714286
CCCAC|GACCT	CCCAC	GACCT	7	679	98	0.0714286
CCCCT|GGCCC	CCCCT	GGCCC	12	408	168	0.0714286
CGCCA|GACCT	CGCCA	GACCT	7	311	98	0.0714286
CACAG|CGCCC	CGCCC	CACAG	7	697	98	0.0714286
CGCCC|GGCCC	CGCCC	GGCCC	12	697	168	0.0714286
GACCT|GCCCG	GCCCG	GACCT	7	257	98	0.0714286
CCCAC|CCCCC	CCCAC	CCCCC	46	679	646	0.0712074
CCCCC|CCCGC	CCCGC	CCCCC	46	628	646	0.0712074
CCCCC|CCTCC	CCTCC	CCCCC	46	511	646	0.0712074
ACCCC|CACCC	ACCCC	CACCC	45	463	632	0.0712025
ACCCC|GCGCC	ACCCC	GCGCC	17	463	239	0.0711297
CACCC|GCGCC	CACCC	GCGCC	17	632	239	0.0711297
CCCTC|GCGCC	CCCTC	GCGCC	17	554	239	0.0711297
CCCCT|CCCGC	CCCGC	CCCCT	29	628	408	0.0710784
CCCCA|GCCGC	CCCCA	GCCGC	19	469	268	0.0708955
CGCCC|GCCGC	CGCCC	GCCGC	19	697	268	0.0708955
GCCCC|GCCGC	GCCCC	GCCGC	19	541	268	0.0708955
AACAC|GAGGG	AACAC	GAGGG	9	156	127	0.0708661
ACCCA|CCCAC	CCCAC	ACCCA	16	679	226	0.0707965
CCCCA|CGCTC	CCCCA	CGCTC	16	469	226	0.0707965
ACCCA|GCCCC	GCCCC	ACCCA	16	541	226	0.0707965
ACCGC|TCGAC	ACCGC	TCGAC	7	318	99	0.0707071
CACTC|CCCAC	CCCAC	CACTC	14	679	198	0.0707071
CCCGC|CCTGC	CCCGC	CCTGC	14	628	198	0.0707071
CCGCC|CCTGC	CCGCC	CCTGC	14	699	198	0.0707071
CCTCC|TCGAC	CCTCC	TCGAC	7	511	99	0.0707071
GCACC|TCGAC	GCACC	TCGAC	7	255	99	0.0707071
CACTC|GCCCC	GCCCC	CACTC	14	541	198	0.0707071
GGCAC|TCGAC	GGCAC	TCGAC	7	105	99	0.0707071
CACCC|CCGCG	CACCC	CCGCG	20	632	283	0.0706714
CCCCA|CCGCG	CCCCA	CCGCG	20	469	283	0.0706714
CCTAC|GCCCC	GCCCC	CCTAC	13	541	184	0.0706522
ACACG|CCCCC	CCCCC	ACACG	12	646	170	0.0705882
CCCCC|GCCCA	CCCCC	GCCCA	18	646	255	0.0705882
ACCCG|CCCGC	CCCGC	ACCCG	17	628	241	0.0705394
CGCCC|GACGC	CGCCC	GACGC	11	697	156	0.0705128
GACGC|GCCCC	GCCCC	GACGC	11	541	156	0.0705128
CCCTC|CGCCC	CCCTC	CGCCC	49	554	697	0.0703013
CCTCC|CGCCC	CCTCC	CGCCC	49	511	697	0.0703013
ACCCC|CCCAA	ACCCC	CCCAA	12	463	171	0.0701754
CCCAC|CTTCC	CCCAC	CTTCC	8	679	114	0.0701754
CCCAA|CCCCA	CCCCA	CCCAA	12	469	171	0.0701754
CCCAA|CCCCG	CCCCG	CCCAA	12	467	171	0.0701754
CCTCC|CTTCC	CCTCC	CTTCC	8	511	114	0.0701754
CGCCC|CTTCC	CGCCC	CTTCC	8	697	114	0.0701754
CTTCC|TCGCC	TCGCC	CTTCC	8	189	114	0.0701754
CCACA|CCACC	CCACC	CCACA	19	737	271	0.0701107
CCACA|CCCGC	CCCGC	CCACA	19	628	271	0.0701107
CCCCC|TCACC	CCCCC	TCACC	15	646	214	0.0700935
GCCAC|TCACC	GCCAC	TCACC	15	333	214	0.0700935
CCACC|GCGCG	CCACC	GCGCG	11	737	157	0.0700637
CCGCC|GCGCG	CCGCC	GCGCG	11	699	157	0.0700637
CCCGC|CTCCC	CTCCC	CCCGC	44	442	628	0.0700637
CGCCC|GCCCG	CGCCC	GCCCG	18	697	257	0.0700389
ACACC|TCACG	ACACC	TCACG	7	288	100	0.07
CACCC|TCACG	CACCC	TCACG	7	632	100	0.07
CACCG|GACCC	CACCG	GACCC	14	329	200	0.07
CCACC|TCACG	CCACC	TCACG	7	737	100	0.07
CCCAC|GACCC	CCCAC	GACCC	14	679	200	0.07
ACGAC|CACCC	CACCC	ACGAC	10	632	143	0.0699301
ACGAC|GAGGA	GAGGA	ACGAC	10	303	143	0.0699301
CCCGC|CCGGC	CCCGC	CCGGC	13	628	186	0.0698925
CACCT|GCCCC	GCCCC	CACCT	16	541	229	0.069869
CCTCA|GCCCC	GCCCC	CCTCA	16	541	229	0.069869
ACCCA|CTCCA	ACCCA	CTCCA	12	226	172	0.0697674
CCCCG|CTCCA	CCCCG	CTCCA	12	467	172	0.0697674
CTCCA|GCCCC	GCCCC	CTCCA	12	541	172	0.0697674
GCAAC|GCCCC	GCCCC	GCAAC	9	541	129	0.0697674
CTCCA|TCCCC	TCCCC	CTCCA	12	330	172	0.0697674
CCCCC|GCCCC	GCCCC	CCCCC	45	541	646	0.0696594
CACCA|CGCGT	CACCA	CGCGT	8	288	115	0.0695652
ACCTC|CCACC	CCACC	ACCTC	16	737	230	0.0695652
ACCTC|CCCGC	CCCGC	ACCTC	16	628	230	0.0695652
CCCTC|CGCGT	CCCTC	CGCGT	8	554	115	0.0695652
CACGG|CCGCG	CCGCG	CACGG	8	283	115	0.0695652
ACCTC|CTCCC	CTCCC	ACCTC	16	442	230	0.0695652
ACCCC|TCCCT	ACCCC	TCCCT	10	463	144	0.0694444
CCCCC|TCCCT	CCCCC	TCCCT	10	646	144	0.0694444
CACCA|CCTCC	CCTCC	CACCA	20	511	288	0.0694444
ACACC|CGCCC	CGCCC	ACACC	20	697	288	0.0694444
GCCAC|TCCCT	GCCAC	TCCCT	10	333	144	0.0694444
ACACC|GCCCC	GCCCC	ACACC	20	541	288	0.0694444
CACCG|GCCCT	CACCG	GCCCT	14	329	202	0.0693069
CCCCC|GCCCT	CCCCC	GCCCT	14	646	202	0.0693069
CCGCG|GCCCT	CCGCG	GCCCT	14	283	202	0.0693069
CCTCC|GCCCT	CCTCC	GCCCT	14	511	202	0.0693069
CCCCC|CTCAC	CCCCC	CTCAC	18	646	260	0.0692308
CCCCT|CGACA	CCCCT	CGACA	9	408	130	0.0692308
CCCAT|CCGCG	CCGCG	CCCAT	9	283	130	0.0692308
CCCAT|CCTCC	CCTCC	CCCAT	9	511	130	0.0692308
CGCCA|TACCC	CGCCA	TACCC	9	311	130	0.0692308
CTCCC|TACCC	CTCCC	TACCC	9	442	130	0.0692308
ACCGC|CCGCC	CCGCC	ACCGC	22	699	318	0.0691824
CCGTC|CGCAC	CGCAC	CCGTC	15	333	217	0.0691244
CCGTC|CGCCC	CGCCC	CCGTC	15	697	217	0.0691244
CCGTC|CTCCC	CTCCC	CCGTC	15	442	217	0.0691244
CCGCG|CGCCG	CCGCG	CGCCG	19	283	275	0.0690909
CCCGC|GCCAC	CCCGC	GCCAC	23	628	333	0.0690691
ACCCC|CAGCC	ACCCC	CAGCC	12	463	174	0.0689655
CCACT|CCCAC	CCCAC	CCACT	14	679	203	0.0689655
AACCC|CCCCC	CCCCC	AACCC	12	646	174	0.0689655
CCACT|CCCTC	CCCTC	CCACT	14	554	203	0.0689655
CCCCA|CGCCC	CCCCA	CGCCC	48	469	697	0.0688666
CGCCC|GCCCC	GCCCC	CGCCC	48	541	697	0.0688666
CGCCC|TCCCC	TCCCC	CGCCC	48	330	697	0.0688666
CCATC|CCCTC	CCCTC	CCATC	13	554	189	0.0687831
CCTCC|TCGCC	CCTCC	TCGCC	13	511	189	0.0687831
ACGCC|CTACC	ACGCC	CTACC	11	294	160	0.06875
CCCCA|CTACC	CCCCA	CTACC	11	469	160	0.06875
CCCGC|CTACC	CCCGC	CTACC	11	628	160	0.06875
CCCTC|CTACC	CCCTC	CTACC	11	554	160	0.06875
CGCCC|CTACC	CGCCC	CTACC	11	697	160	0.06875
ACACA|CGAGG	ACACA	CGAGG	9	177	131	0.0687023
CCCAC|CGAGG	CCCAC	CGAGG	9	679	131	0.0687023
CCCCC|CCGCC	CCCCC	CCGCC	48	646	699	0.0686695
CACCC|CCCGA	CACCC	CCCGA	14	632	204	0.0686275
CCCCG|CCCCT	CCCCG	CCCCT	28	467	408	0.0686275
CCCCG|CCCGA	CCCCG	CCCGA	14	467	204	0.0686275
CCCGA|CCGCC	CCGCC	CCCGA	14	699	204	0.0686275
CCCGA|CCTCC	CCTCC	CCCGA	14	511	204	0.0686275
CCCAC|CCGAC	CCCAC	CCGAC	19	679	277	0.0685921
CCCCG|CCGAC	CCCCG	CCGAC	19	467	277	0.0685921
CCCCT|CTGCC	CCCCT	CTGCC	12	408	175	0.0685714
CTCCC|CTGCC	CTCCC	CTGCC	12	442	175	0.0685714
CCCCG|CCTCC	CCTCC	CCCCG	32	511	467	0.0685225
CCTCC|CTCCC	CTCCC	CCTCC	35	442	511	0.0684932
CCCCT|GCCCC	CCCCT	GCCCC	37	408	541	0.0683919
CAACC|CCTCC	CCTCC	CAACC	16	511	234	0.0683761
CCCAC|GACAC	CCCAC	GACAC	11	679	161	0.068323
CCCCC|GACAC	CCCCC	GACAC	11	646	161	0.068323
CCCCA|CTCCC	CTCCC	CCCCA	32	442	469	0.0682303
AACGC|ACCCC	ACCCC	AACGC	9	463	132	0.0681818
CATCC|CCCCG	CCCCG	CATCC	12	467	176	0.0681818
AACGC|CCCGC	CCCGC	AACGC	9	628	132	0.0681818
CATCC|CCCGC	CCCGC	CATCC	12	628	176	0.0681818
AACGC|CGCCC	CGCCC	AACGC	9	697	132	0.0681818
CATCC|TCCCC	TCCCC	CATCC	12	330	176	0.0681818
ACCCC|CCCCC	ACCCC	CCCCC	44	463	646	0.0681115
CCCCC|CCCGT	CCCCC	CCCGT	13	646	191	0.0680628
CCCGT|CCCTC	CCCTC	CCCGT	13	554	191	0.0680628
CCCGT|CCGCC	CCGCC	CCCGT	13	699	191	0.0680628
CACCC|GCCCC	GCCCC	CACCC	43	541	632	0.068038
CAACA|CACCC	CACCC	CAACA	10	632	147	0.0680272
CAACA|CCACC	CCACC	CAACA	10	737	147	0.0680272
CAACA|CCCAC	CCCAC	CAACA	10	679	147	0.0680272
CAACA|CCCCT	CCCCT	CAACA	10	408	147	0.0680272
CAACA|CCCTC	CCCTC	CAACA	10	554	147	0.0680272
CAACA|CCTCC	CCTCC	CAACA	10	511	147	0.0680272
CACAC|CCCTC	CCCTC	CACAC	24	554	353	0.0679887
CCACG|CGCGG	CCACG	CGCGG	7	296	103	0.0679612
CCCCA|CGCCT	CCCCA	CGCCT	14	469	206	0.0679612
CCCCA|CCGCA	CCCCA	CCGCA	18	469	265	0.0679245
CCACC|GACCA	CCACC	GACCA	8	737	118	0.0677966
CCTCC|CTCGC	CCTCC	CTCGC	16	511	236	0.0677966
CGCCC|GACCA	CGCCC	GACCA	8	697	118	0.0677966
CGCCG|TCCGC	CGCCG	TCCGC	12	275	177	0.0677966
GCCGC|TACAC	GCCGC	TACAC	8	268	118	0.0677966
CCCAC|CCCCC	CCCCC	CCCAC	46	646	679	0.0677467
ACCAC|CCCCC	CCCCC	ACCAC	22	646	325	0.0676923
ACCAC|GCCCC	GCCCC	ACCAC	22	541	325	0.0676923
CCCAC|GCGAC	CCCAC	GCGAC	9	679	133	0.0676692
CCCCC|CCTCT	CCCCC	CCTCT	9	646	133	0.0676692
CCTCT|GCCCC	GCCCC	CCTCT	9	541	133	0.0676692
CCACG|CCTCG	CCACG	CCTCG	14	296	207	0.0676329
CCCCA|CCTCG	CCCCA	CCTCG	14	469	207	0.0676329
CCCTC|CCTCG	CCCTC	CCTCG	14	554	207	0.0676329
CCGCC|CCTCG	CCGCC	CCTCG	14	699	207	0.0676329
ACCCC|TCCCG	ACCCC	TCCCG	10	463	148	0.0675676
CACCC|TCCCG	CACCC	TCCCG	10	632	148	0.0675676
AGCCC|CCCGC	CCCGC	AGCCC	11	628	163	0.0674847
AGCCC|CCTCC	CCTCC	AGCCC	11	511	163	0.0674847
CCCCA|CCGCC	CCCCA	CCGCC	47	469	699	0.0672389
CCCGC|GTCCC	CCCGC	GTCCC	8	628	119	0.0672269
CCTCC|GTCCC	CCTCC	GTCCC	8	511	119	0.0672269
ATCCC|CGACC	CGACC	ATCCC	9	301	134	0.0671642
ATCCC|TCCCC	TCCCC	ATCCC	9	330	134	0.0671642
CCGCG|CGCAC	CGCAC	CCGCG	19	333	283	0.0671378
CCGCG|CGCCG	CGCCG	CCGCG	19	275	283	0.0671378
CCACC|CCCTG	CCACC	CCCTG	11	737	164	0.0670732
CCCTG|CCTCC	CCTCC	CCCTG	11	511	164	0.0670732
CGCCC|GCGCC	CGCCC	GCGCC	16	697	239	0.0669456
CCCGC|GCCCC	GCCCC	CCCGC	42	541	628	0.066879
ACCAC|GCACG	ACCAC	GCACG	9	325	135	0.0666667
CACCC|CCGCT	CACCC	CCGCT	12	632	180	0.0666667
CACCC|CGCGC	CACCC	CGCGC	22	632	330	0.0666667
CACGC|TCCTC	CACGC	TCCTC	8	361	120	0.0666667
CCCCT|TCCCC	CCCCT	TCCCC	22	408	330	0.0666667
CCCGC|GCCCA	CCCGC	GCCCA	17	628	255	0.0666667
CCGCC|CCGCT	CCGCC	CCGCT	12	699	180	0.0666667
CCGCC|GCACC	CCGCC	GCACC	17	699	255	0.0666667
CCGCG|GCACG	CCGCG	GCACG	9	283	135	0.0666667
CCTCC|GCACG	CCTCC	GCACG	9	511	135	0.0666667
CCTCC|GGCAC	CCTCC	GGCAC	7	511	105	0.0666667
CGACC|GCACC	CGACC	GCACC	17	301	255	0.0666667
CGACC|GCACG	CGACC	GCACG	9	301	135	0.0666667
CCGCT|GCCCC	GCCCC	CCGCT	12	541	180	0.0666667
GGCAC|TCGAC	TCGAC	GGCAC	7	99	105	0.0666667
CCACC|GCCCC	GCCCC	CCACC	49	541	737	0.0664858
CACGC|CGCCC	CGCCC	CACGC	24	697	361	0.066482
ACCCC|CGACC	ACCCC	CGACC	20	463	301	0.0664452
CACCC|CGACC	CACCC	CGACC	20	632	301	0.0664452
CGACC|CGCAC	CGCAC	CGACC	20	333	301	0.0664452
ACCCG|CCCCC	CCCCC	ACCCG	16	646	241	0.06639
CCCCA|CCCCG	CCCCA	CCCCG	31	469	467	0.0663812
ACGCC|CGCTC	ACGCC	CGCTC	15	294	226	0.0663717
CCTCC|CGCTC	CCTCC	CGCTC	15	511	226	0.0663717
ACCCC|CCCAC	ACCCC	CCCAC	45	463	679	0.0662739
CCCAC|CCTCC	CCTCC	CCCAC	45	511	679	0.0662739
ACGCG|CCACC	CCACC	ACGCG	11	737	166	0.0662651
CCGCA|GCTCC	CCGCA	GCTCC	11	265	166	0.0662651
CTCCC|GCTCC	CTCCC	GCTCC	11	442	166	0.0662651
ACGCG|GCCCC	GCCCC	ACGCG	11	541	166	0.0662651
ACCCC|GCCCG	ACCCC	GCCCG	17	463	257	0.0661479
CCCCA|GCCCG	CCCCA	GCCCG	17	469	257	0.0661479
CCCTC|GCCCG	CCCTC	GCCCG	17	554	257	0.0661479
CTCCC|GCCCG	CTCCC	GCCCG	17	442	257	0.0661479
CACCC|GACCG	CACCC	GACCG	8	632	121	0.0661157
CCACC|GACCG	CCACC	GACCG	8	737	121	0.0661157
CCACG|GACCG	CCACG	GACCG	8	296	121	0.0661157
CCGCA|GACCG	CCGCA	GACCG	8	265	121	0.0661157
GACCG|GCCAC	GCCAC	GACCG	8	333	121	0.0661157
GACCG|GCCCC	GCCCC	GACCG	8	541	121	0.0661157
CCCCA|CCCCG	CCCCG	CCCCA	31	467	469	0.0660981
CGCAC|CGCCC	CGCCC	CGCAC	22	697	333	0.0660661
CGCCC|GCCAC	CGCCC	GCCAC	22	697	333	0.0660661
CTCCC|GCCAC	CTCCC	GCCAC	22	442	333	0.0660661
GCCAC|GCCCC	GCCCC	GCCAC	22	541	333	0.0660661
AGGAG|CACAA	AGGAG	CACAA	7	349	106	0.0660377
CACCA|CGAAC	CACCA	CGAAC	7	288	106	0.0660377
CACCC|CGTCG	CACCC	CGTCG	7	632	106	0.0660377
CACAA|CAGCC	CAGCC	CACAA	7	174	106	0.0660377
CCACC|CGTCG	CCACC	CGTCG	7	737	106	0.0660377
CCCAC|CGTCG	CCCAC	CGTCG	7	679	106	0.0660377
CCCGC|CGTCG	CCCGC	CGTCG	7	628	106	0.0660377
CCCTC|CGTCG	CCCTC	CGTCG	7	554	106	0.0660377
CGTCG|GCGCC	GCGCC	CGTCG	7	239	106	0.0660377
CCCCT|CGCCC	CCCCT	CGCCC	46	408	697	0.0659971
ACCCT|TGCAC	ACCCT	TGCAC	6	204	91	0.0659341
ACGCC|TGCAC	ACGCC	TGCAC	6	294	91	0.0659341
AGGAG|TGCAC	AGGAG	TGCAC	6	349	91	0.0659341
CCCCG|TGCAC	CCCCG	TGCAC	6	467	91	0.0659341
CCCGC|TGCAC	CCCGC	TGCAC	6	628	91	0.0659341
CCCGG|TGCAC	CCCGG	TGCAC	6	137	91	0.0659341
CCTCC|TGCAC	CCTCC	TGCAC	6	511	91	0.0659341
CTCCC|TGCAC	CTCCC	TGCAC	6	442	91	0.0659341
CACCC|CTCCG	CACCC	CTCCG	11	632	167	0.0658683
CCCGC|CTCCG	CCCGC	CTCCG	11	628	167	0.0658683
CCCAC|CCCGG	CCCAC	CCCGG	9	679	137	0.0656934
CCCCT|CCCGG	CCCCT	CCCGG	9	408	137	0.0656934
CCCGG|CGCAC	CGCAC	CCCGG	9	333	137	0.0656934
CACCC|CACTC	CACCC	CACTC	13	632	198	0.0656566
CCTCC|CCTGC	CCTCC	CCTGC	13	511	198	0.0656566
CCTCC|TCCAC	CCTCC	TCCAC	13	511	198	0.0656566
CCTGC|TCCCC	TCCCC	CCTGC	13	330	198	0.0656566
TCCAC|TCCCC	TCCCC	TCCAC	13	330	198	0.0656566
CCACC|GGCCC	CCACC	GGCCC	11	737	168	0.0654762
GGCCC|TCACC	TCACC	GGCCC	11	214	168	0.0654762
CACCC|CGCCG	CACCC	CGCCG	18	632	275	0.0654545
CCCGC|CGCCG	CCCGC	CGCCG	18	628	275	0.0654545
AACCC|TCACC	AACCC	TCACC	14	174	214	0.0654206
ACCGA|CCACG	CCACG	ACCGA	7	296	107	0.0654206
ACGGC|CCCAC	CCCAC	ACGGC	7	679	107	0.0654206
ACCGA|CCCCA	CCCCA	ACCGA	7	469	107	0.0654206
ACCGA|CCCTC	CCCTC	ACCGA	7	554	107	0.0654206
ACCGA|CGCCC	CGCCC	ACCGA	7	697	107	0.0654206
ACCCC|CTCAC	ACCCC	CTCAC	17	463	260	0.0653846
ACCAC|CCTAC	ACCAC	CCTAC	12	325	184	0.0652174
ACCTC|CCCCG	CCCCG	ACCTC	15	467	230	0.0652174
CCCGC|CCTAC	CCCGC	CCTAC	12	628	184	0.0652174
CCCTC|CCTAC	CCCTC	CCTAC	12	554	184	0.0652174
CCGCC|CCTAC	CCGCC	CCTAC	12	699	184	0.0652174
CCTAC|CCTCC	CCTCC	CCTAC	12	511	184	0.0652174
CACAC|CCCCG	CCCCG	CACAC	23	467	353	0.0651558
CCACC|CCCCG	CCCCG	CCACC	48	467	737	0.0651289
ACCCC|CACGA	ACCCC	CACGA	8	463	123	0.0650407
ACCGC|CTCCT	ACCGC	CTCCT	8	318	123	0.0650407
ACCGC|CTCTC	ACCGC	CTCTC	8	318	123	0.0650407
CACCG|CTCCT	CACCG	CTCCT	8	329	123	0.0650407
CCCCA|CTCTC	CCCCA	CTCTC	8	469	123	0.0650407
CCCCG|CTCCT	CCCCG	CTCCT	8	467	123	0.0650407
CCTCC|CTCCT	CCTCC	CTCCT	8	511	123	0.0650407
CACGA|CGCAC	CGCAC	CACGA	8	333	123	0.0650407
CAACG|GCCAC	GCCAC	CAACG	8	333	123	0.0650407
CTCTC|GCCAC	GCCAC	CTCTC	8	333	123	0.0650407
CACCC|GACCC	CACCC	GACCC	13	632	200	0.065
ACCCC|CCCTC	ACCCC	CCCTC	36	463	554	0.0649819
CCCCT|CCCTC	CCCCT	CCCTC	36	408	554	0.0649819
ACACC|GGCGC	ACACC	GGCGC	7	288	108	0.0648148
CACCC|GCCGA	CACCC	GCCGA	7	632	108	0.0648148
CCACC|GCCGA	CCACC	GCCGA	7	737	108	0.0648148
CGCCC|GCCGA	CGCCC	GCCGA	7	697	108	0.0648148
ACCCC|CCTTC	ACCCC	CCTTC	9	463	139	0.0647482
CCCTC|CCTTC	CCCTC	CCTTC	9	554	139	0.0647482
ACACG|CACAC	CACAC	ACACG	11	353	170	0.0647059
ACACG|CCACC	CCACC	ACACG	11	737	170	0.0647059
ACACG|CCCAC	CCCAC	ACACG	11	679	170	0.0647059
ACACG|GAGGA	GAGGA	ACACG	11	303	170	0.0647059
ACGCC|CCCCC	CCCCC	ACGCC	19	646	294	0.0646259
CCTCC|TCCCC	TCCCC	CCTCC	33	330	511	0.0645793
ACCCC|ATCAC	ACCCC	ATCAC	6	463	93	0.0645161
ACGCC|CCGGC	ACGCC	CCGGC	12	294	186	0.0645161
CACCC|CCCTA	CACCC	CCCTA	10	632	155	0.0645161
CACGC|CCGGC	CACGC	CCGGC	12	361	186	0.0645161
CCACC|CCCTA	CCACC	CCCTA	10	737	155	0.0645161
CCACC|CCGGC	CCACC	CCGGC	12	737	186	0.0645161
CCCCG|CCCTA	CCCCG	CCCTA	10	467	155	0.0645161
CCCCT|CCCTA	CCCCT	CCCTA	10	408	155	0.0645161
CCCGC|CCCTA	CCCGC	CCCTA	10	628	155	0.0645161
CCCTC|CCGTC	CCCTC	CCGTC	14	554	217	0.0645161
ATCAC|CCGAC	CCGAC	ATCAC	6	277	93	0.0645161
ATCAC|CCGCC	CCGCC	ATCAC	6	699	93	0.0645161
ATCAC|CGACC	CGACC	ATCAC	6	301	93	0.0645161
CCCTA|CGCCC	CGCCC	CCCTA	10	697	155	0.0645161
ATCAC|GCCAC	GCCAC	ATCAC	6	333	93	0.0645161
ATCAC|GCCCA	GCCCA	ATCAC	6	255	93	0.0645161
CCGGC|GCCCC	GCCCC	CCGGC	12	541	186	0.0645161
ATCAC|GGAGG	GGAGG	ATCAC	6	371	93	0.0645161
CCCCT|GCCCT	CCCCT	GCCCT	13	408	202	0.0643564
ACCCC|CCACG	ACCCC	CCACG	19	463	296	0.0641892
CACGC|GACGC	CACGC	GACGC	10	361	156	0.0641026
CCCAC|GACGC	CCCAC	GACGC	10	679	156	0.0641026
CAACC|CCCGC	CCCGC	CAACC	15	628	234	0.0641026
CCGCG|GACGC	CCGCG	GACGC	10	283	156	0.0641026
GACGC|GGAGG	GGAGG	GACGC	10	371	156	0.0641026
CCACT|GCACC	GCACC	CCACT	13	255	203	0.0640394
CACCG|TCCCA	CACCG	TCCCA	8	329	125	0.064
CACGC|CCAAC	CACGC	CCAAC	16	361	250	0.064
CCTCC|TCCCA	CCTCC	TCCCA	8	511	125	0.064
CACGC|CCCCA	CACGC	CCCCA	30	361	469	0.0639659
CCCGA|CTCCA	CCCGA	CTCCA	11	204	172	0.0639535
CCTCC|CTCCA	CCTCC	CTCCA	11	511	172	0.0639535
CACCG|CCCCA	CCCCA	CACCG	21	469	329	0.0638298
ACCCC|ACCCT	ACCCC	ACCCT	13	463	204	0.0637255
ACCCT|CACCT	CACCT	ACCCT	13	229	204	0.0637255
ACCCT|CCCCG	CCCCG	ACCCT	13	467	204	0.0637255
CCCCT|CGCCA	CGCCA	CCCCT	26	311	408	0.0637255
CCCGA|CGCCC	CGCCC	CCCGA	13	697	204	0.0637255
CCCCT|CTCCC	CTCCC	CCCCT	26	442	408	0.0637255
CCCGA|GCCCC	GCCCC	CCCGA	13	541	204	0.0637255
CACGC|CCCCC	CCCCC	CACGC	23	646	361	0.0637119
CCCAC|GCGCG	CCCAC	GCGCG	10	679	157	0.0636943
CGCGC|GCCCC	GCCCC	CGCGC	21	541	330	0.0636364
ACGCC|CCGCG	ACGCC	CCGCG	18	294	283	0.0636042
CCCCC|CCGCG	CCCCC	CCGCG	18	646	283	0.0636042
CCCGC|CCGCG	CCCGC	CCGCG	18	628	283	0.0636042
ACCCC|ACTCC	ACCCC	ACTCC	11	463	173	0.0635838
ACTCC|CGCCT	CGCCT	ACTCC	11	206	173	0.0635838
CACGC|CTCGC	CACGC	CTCGC	15	361	236	0.0635593
ACACC|CGCAA	ACACC	CGCAA	8	288	126	0.0634921
CCCAC|CGCAA	CCCAC	CGCAA	8	679	126	0.0634921
CCATC|CCCCG	CCCCG	CCATC	12	467	189	0.0634921
CCCCG|TCGCC	CCCCG	TCGCC	12	467	189	0.0634921
CCATC|CCCGC	CCCGC	CCATC	12	628	189	0.0634921
CCCTC|TCGCC	CCCTC	TCGCC	12	554	189	0.0634921
CCGCC|CGCAA	CCGCC	CGCAA	8	699	126	0.0634921
CGCAA|CGCCC	CGCCC	CGCAA	8	697	126	0.0634921
CTCCC|TCGCC	CTCCC	TCGCC	12	442	189	0.0634921
CCATC|GCCCC	GCCCC	CCATC	12	541	189	0.0634921
CCATC|GCGCC	GCGCC	CCATC	12	239	189	0.0634921
CCCAC|CCCCG	CCCCG	CCCAC	43	467	679	0.0633284
CCCAC|GCCCC	GCCCC	CCCAC	43	541	679	0.0633284
AACCC|ACACC	ACACC	AACCC	11	288	174	0.0632184
AACCC|CACAC	CACAC	AACCC	11	353	174	0.0632184
AACCC|CACCT	CACCT	AACCC	11	229	174	0.0632184
CAGCC|CCCCA	CCCCA	CAGCC	11	469	174	0.0632184
CAGCC|CCGCC	CCGCC	CAGCC	11	699	174	0.0632184
AACCC|CTCCC	CTCCC	AACCC	11	442	174	0.0632184
CAGCC|GCCCC	GCCCC	CAGCC	11	541	174	0.0632184
AACCC|TCCAC	TCCAC	AACCC	11	198	174	0.0632184
ACCAC|CTGAC	ACCAC	CTGAC	6	325	95	0.0631579
ACCGC|CTGAC	ACCGC	CTGAC	6	318	95	0.0631579
CCGCC|CTGAC	CCGCC	CTGAC	6	699	95	0.0631579
ACATC|GAGGA	GAGGA	ACATC	6	303	95	0.0631579
CTGAC|GGAGG	GGAGG	CTGAC	6	371	95	0.0631579
CTGAC|GGCGC	GGCGC	CTGAC	6	108	95	0.0631579
CCCAC|CGACC	CCCAC	CGACC	19	679	301	0.0631229
CCCCG|CGACC	CCCCG	CGACC	19	467	301	0.0631229
AAGGA|ACACT	AAGGA	ACACT	7	299	111	0.0630631
ACACT|AGGAG	AGGAG	ACACT	7	349	111	0.0630631
ACACT|CACGC	CACGC	ACACT	7	361	111	0.0630631
ACCAA|CCACC	CCACC	ACCAA	7	737	111	0.0630631
CCACC|GCCAC	CCACC	GCCAC	21	737	333	0.0630631
ACCAA|CCGCC	CCGCC	ACCAA	7	699	111	0.0630631
CCGCC|GCGCA	CCGCC	GCGCA	7	699	111	0.0630631
ACCAA|GAGGA	GAGGA	ACCAA	7	303	111	0.0630631
GAGGA|GCGCA	GAGGA	GCGCA	7	303	111	0.0630631
ACCAA|GCCCC	GCCCC	ACCAA	7	541	111	0.0630631
GCGCA|TCCCC	TCCCC	GCGCA	7	330	111	0.0630631
ACACT|GAGGG	ACACT	GAGGG	8	111	127	0.0629921
CCGCC|GCCCC	GCCCC	CCGCC	44	541	699	0.0629471
CCACC|CCCTT	CCACC	CCCTT	9	737	143	0.0629371
CCCCA|CCCTT	CCCCA	CCCTT	9	469	143	0.0629371
ACGAC|GCCCC	GCCCC	ACGAC	9	541	143	0.0629371
CCCTC|CTGCC	CCCTC	CTGCC	11	554	175	0.0628571
CTGCC|TCCCC	TCCCC	CTGCC	11	330	175	0.0628571
CCCCA|GCCCC	CCCCA	GCCCC	34	469	541	0.0628466
ACACC|CCCGT	ACACC	CCCGT	12	288	191	0.0628272
CCCCC|CCTCG	CCCCC	CCTCG	13	646	207	0.0628019
CCTCG|GCCCC	GCCCC	CCTCG	13	541	207	0.0628019
CCCCT|GCGCC	CCCCT	GCGCC	15	408	239	0.0627615
CCTCC|GCGCC	CCTCC	GCGCC	15	511	239	0.0627615
ACCAC|GCACC	ACCAC	GCACC	16	325	255	0.0627451
CCCAC|GCCCA	CCCAC	GCCCA	16	679	255	0.0627451
CCCTC|GCCCA	CCCTC	GCCCA	16	554	255	0.0627451
CTCCC|GCACC	CTCCC	GCACC	16	442	255	0.0627451
CCACA|CCCAC	CCCAC	CCACA	17	679	271	0.0627306
CCACA|CCTCC	CCTCC	CCACA	17	511	271	0.0627306
CCACA|GCCCC	GCCCC	CCACA	17	541	271	0.0627306
CCCCG|CCTCC	CCCCG	CCTCC	32	467	511	0.0626223
CCCCT|CCTCC	CCCCT	CCTCC	32	408	511	0.0626223
ACACC|TCCCT	ACACC	TCCCT	9	288	144	0.0625
ACCAC|CTACC	ACCAC	CTACC	10	325	160	0.0625
ACACC|ACCCC	ACCCC	ACACC	18	463	288	0.0625
ACCCC|CATCC	ACCCC	CATCC	11	463	176	0.0625
ACGGA|CACAC	CACAC	ACGGA	6	353	96	0.0625
CACCC|CATCC	CACCC	CATCC	11	632	176	0.0625
CACCC|CTACC	CACCC	CTACC	10	632	160	0.0625
CACCC|TCCCT	CACCC	TCCCT	9	632	144	0.0625
CACCG|CTACC	CACCG	CTACC	10	329	160	0.0625
CCACC|CGCGA	CCACC	CGCGA	9	737	144	0.0625
CCCAC|CGCGA	CCCAC	CGCGA	9	679	144	0.0625
CCCCT|TCCCT	CCCCT	TCCCT	9	408	144	0.0625
CATCC|CCCTC	CCCTC	CATCC	11	554	176	0.0625
CGACC|CTACC	CGACC	CTACC	10	301	160	0.0625
CGCCA|CTACC	CGCCA	CTACC	10	311	160	0.0625
CGCCA|TCCCT	CGCCA	TCCCT	9	311	144	0.0625
CGCGA|CTCAC	CTCAC	CGCGA	9	260	144	0.0625
CATCC|GCCCC	GCCCC	CATCC	11	541	176	0.0625
AGGAA|GCGCA	GCGCA	AGGAA	8	111	128	0.0625
ACACC|TCCCC	TCCCC	ACACC	18	330	288	0.0625
CCACC|CTCCC	CTCCC	CCACC	46	442	737	0.0624152
CACAC|CGCCC	CGCCC	CACAC	22	697	353	0.0623229
CACCG|GCCCG	CACCG	GCCCG	16	329	257	0.0622568
ACCCC|ACCCG	ACCCC	ACCCG	15	463	241	0.0622407
ACCCG|CCCTC	CCCTC	ACCCG	15	554	241	0.0622407
CACCT|TCCGC	CACCT	TCCGC	11	229	177	0.0621469
ACACA|GAGGG	GAGGG	ACACA	11	127	177	0.0621469
TCCCC|TCCGC	TCCCC	TCCGC	11	330	177	0.0621469
CCGCC|GACAC	CCGCC	GACAC	10	699	161	0.0621118
ACCCC|CCCGC	ACCCC	CCCGC	39	463	628	0.0621019
CCCCA|CCCGC	CCCCA	CCCGC	39	469	628	0.0621019
CCACC|CGACG	CCACC	CGACG	9	737	145	0.062069
CCCTC|CGACG	CCCTC	CGACG	9	554	145	0.062069
CCGCC|CGACG	CCGCC	CGACG	9	699	145	0.062069
AACGC|AGAGG	AACGC	AGAGG	7	132	113	0.0619469
ACCGC|CGCTC	ACCGC	CGCTC	14	318	226	0.0619469
AGAGG|CAACA	CAACA	AGAGG	7	147	113	0.0619469
ACCCA|CCCCA	CCCCA	ACCCA	14	469	226	0.0619469
ACCCA|CCTCC	CCTCC	ACCCA	14	511	226	0.0619469
ACCCA|CGCAC	CGCAC	ACCCA	14	333	226	0.0619469
ACCCA|GCACC	GCACC	ACCCA	14	255	226	0.0619469
ACCCA|GCCCG	GCCCG	ACCCA	14	257	226	0.0619469
CGCCC|CGCCG	CGCCC	CGCCG	17	697	275	0.0618182
CACCC|CCCCG	CCCCG	CACCC	39	467	632	0.0617089
ACCAC|TACCC	ACCAC	TACCC	8	325	130	0.0615385
ACCAC|ACCCC	ACCCC	ACCAC	20	463	325	0.0615385
ACCGC|CCCAT	ACCGC	CCCAT	8	318	130	0.0615385
CAACC|TACCC	CAACC	TACCC	8	234	130	0.0615385
CACAC|TACCC	CACAC	TACCC	8	353	130	0.0615385
CACCG|CCCAT	CACCG	CCCAT	8	329	130	0.0615385
ACAAC|CCCAC	CCCAC	ACAAC	8	679	130	0.0615385
ACCAC|CCCAC	CCCAC	ACCAC	20	679	325	0.0615385
CCCCA|CGACA	CCCCA	CGACA	8	469	130	0.0615385
ACAAC|CCCCC	CCCCC	ACAAC	8	646	130	0.0615385
ACAAC|CCCCT	CCCCT	ACAAC	8	408	130	0.0615385
CCCAT|CCCCT	CCCCT	CCCAT	8	408	130	0.0615385
CCCGC|CGACA	CCCGC	CGACA	8	628	130	0.0615385
CCCAT|CCCTC	CCCTC	CCCAT	8	554	130	0.0615385
ACAAC|CCGCC	CCGCC	ACAAC	8	699	130	0.0615385
CCTCC|CGACA	CCTCC	CGACA	8	511	130	0.0615385
CCCAT|CGCGC	CGCGC	CCCAT	8	330	130	0.0615385
ACCAC|CTCCC	CTCCC	ACCAC	20	442	325	0.0615385
GCCAC|TACCC	GCCAC	TACCC	8	333	130	0.0615385
CTCAC|GCCCC	GCCCC	CTCAC	16	541	260	0.0615385
GCCGC|TACCC	GCCGC	TACCC	8	268	130	0.0615385
ACCCC|CTTCC	ACCCC	CTTCC	7	463	114	0.0614035
ACGCC|CTTCC	ACGCC	CTTCC	7	294	114	0.0614035
CCCTC|CTTCC	CCCTC	CTTCC	7	554	114	0.0614035
CCTCG|CTTCC	CCTCG	CTTCC	7	207	114	0.0614035
CGCCT|CTTCC	CGCCT	CTTCC	7	206	114	0.0614035
ACCCC|CCGAC	ACCCC	CCGAC	17	463	277	0.0613718
CACCC|CCGAC	CACCC	CCGAC	17	632	277	0.0613718
CCCCG|CCCTC	CCCCG	CCCTC	34	467	554	0.0613718
ACCCC|ACGCC	ACCCC	ACGCC	18	463	294	0.0612245
ACCCC|CACAG	ACCCC	CACAG	6	463	98	0.0612245
CAACA|CACGC	CACGC	CAACA	9	361	147	0.0612245
CCACG|GGCCA	CCACG	GGCCA	6	296	98	0.0612245
CCCAC|GGCCA	CCCAC	GGCCA	6	679	98	0.0612245
ACGCC|CCCCA	CCCCA	ACGCC	18	469	294	0.0612245
CCAGC|CCCCC	CCCCC	CCAGC	9	646	147	0.0612245
CCCCC|GACCT	CCCCC	GACCT	6	646	98	0.0612245
CCCGA|GACCT	CCCGA	GACCT	6	204	98	0.0612245
CCAGC|CCCGC	CCCGC	CCAGC	9	628	147	0.0612245
CCCGC|GACCT	CCCGC	GACCT	6	628	98	0.0612245
CACAG|CCCTC	CCCTC	CACAG	6	554	98	0.0612245
CCGCC|GACCT	CCGCC	GACCT	6	699	98	0.0612245
ACGCC|CCGCG	CCGCG	ACGCC	18	283	294	0.0612245
CAACA|CGCCC	CGCCC	CAACA	9	697	147	0.0612245
CGCCC|GACCT	CGCCC	GACCT	6	697	98	0.0612245
CGCGC|GACCT	CGCGC	GACCT	6	330	98	0.0612245
ACGCC|CTCCC	CTCCC	ACGCC	18	442	294	0.0612245
GACCT|GCCAC	GCCAC	GACCT	6	333	98	0.0612245
GACCT|GGCCC	GGCCC	GACCT	6	168	98	0.0612245
CCACA|CCTCA	CCACA	CCTCA	14	271	229	0.0611354
CACCT|CCCAC	CCCAC	CACCT	14	679	229	0.0611354
CACCT|CCCCG	CCCCG	CACCT	14	467	229	0.0611354
CACCT|CCCCT	CCCCT	CACCT	14	408	229	0.0611354
CACCA|CCGCT	CACCA	CCGCT	11	288	180	0.0611111
CCGCT|CCTCC	CCTCC	CCGCT	11	511	180	0.0611111
CCGCT|GCCCG	GCCCG	CCGCT	11	257	180	0.0611111
CCCCC|CGCCA	CCCCC	CGCCA	19	646	311	0.0610932
ACGAC|CGAGG	ACGAC	CGAGG	8	143	131	0.0610687
CCACC|CCCCA	CCCCA	CCACC	45	469	737	0.0610583
ACCAC|CCCTG	ACCAC	CCCTG	10	325	164	0.0609756
CCCTG|CCGGC	CCGGC	CCCTG	10	186	164	0.0609756
CCCTG|GCCCG	GCCCG	CCCTG	10	257	164	0.0609756
CCCTG|GGCCC	GGCCC	CCCTG	10	168	164	0.0609756
CACGC|CCCTC	CCCTC	CACGC	22	554	361	0.0609418
ACGCA|CGCGT	ACGCA	CGCGT	7	183	115	0.0608696
CACGG|CCCCC	CCCCC	CACGG	7	646	115	0.0608696
CACGG|CCCCG	CCCCG	CACGG	7	467	115	0.0608696
CACGG|CGACC	CGACC	CACGG	7	301	115	0.0608696
CACGG|CGCCG	CGCCG	CACGG	7	275	115	0.0608696
ACCTC|CGCGC	CGCGC	ACCTC	14	330	230	0.0608696
CGCGT|GCACC	GCACC	CGCGT	7	255	115	0.0608696
ACCTC|GCCCC	GCCCC	ACCTC	14	541	230	0.0608696
CACGG|GCCCC	GCCCC	CACGG	7	541	115	0.0608696
ACCCC|GCACA	ACCCC	GCACA	9	463	148	0.0608108
CCCAC|TCCCG	CCCAC	TCCCG	9	679	148	0.0608108
CCCCA|TCCCG	CCCCA	TCCCG	9	469	148	0.0608108
CCCCT|TCCCG	CCCCT	TCCCG	9	408	148	0.0608108
CCGCG|GCACA	CCGCG	GCACA	9	283	148	0.0608108
CCGTC|GCACA	CCGTC	GCACA	9	217	148	0.0608108
CGACC|TCCCG	CGACC	TCCCG	9	301	148	0.0608108
CTCCC|TCCCG	CTCCC	TCCCG	9	442	148	0.0608108
CCACG|GCCCC	GCCCC	CCACG	18	541	296	0.0608108
CACCG|CCTCC	CCTCC	CACCG	20	511	329	0.0607903
CCCCA|TCACC	CCCCA	TCACC	13	469	214	0.0607477
CCTCC|TCACC	CCTCC	TCACC	13	511	214	0.0607477
CACCG|CCTGC	CACCG	CCTGC	12	329	198	0.0606061
CCCCC|CCTGC	CCCCC	CCTGC	12	646	198	0.0606061
AACGC|CCCCG	CCCCG	AACGC	8	467	132	0.0606061
CCCCG|CCTGC	CCCCG	CCTGC	12	467	198	0.0606061
CCCCG|TCCCC	CCCCG	TCCCC	20	467	330	0.0606061
CACTC|CCCCT	CCCCT	CACTC	12	408	198	0.0606061
CCCTC|CGCGC	CCCTC	CGCGC	20	554	330	0.0606061
CCTCG|CCTGC	CCTCG	CCTGC	12	207	198	0.0606061
CGCAC|TCGAC	CGCAC	TCGAC	6	333	99	0.0606061
CACTC|CGCCT	CGCCT	CACTC	12	206	198	0.0606061
GCCAC|TCGAC	GCCAC	TCGAC	6	333	99	0.0606061
GCCCC|TCCAC	GCCCC	TCCAC	12	541	198	0.0606061
GCGCA|TCGAC	GCGCA	TCGAC	6	111	99	0.0606061
CCCCC|CCGCA	CCCCC	CCGCA	16	646	265	0.0603774
CCCGC|CCGCA	CCCGC	CCGCA	16	628	265	0.0603774
CCGCA|CGACC	CGACC	CCGCA	16	301	265	0.0603774
CCGCA|CTCCC	CTCCC	CCGCA	16	442	265	0.0603774
CACGC|TGCCC	CACGC	TGCCC	10	361	166	0.060241
CCCCA|TGCCC	CCCCA	TGCCC	10	469	166	0.060241
ACGCG|CCCTC	CCCTC	ACGCG	10	554	166	0.060241
CCGAC|GCTCC	CCGAC	GCTCC	10	277	166	0.060241
CCGCC|GCTCC	CCGCC	GCTCC	10	699	166	0.060241
CGCAC|GCTCC	CGCAC	GCTCC	10	333	166	0.060241
CGCCA|TGCCC	CGCCA	TGCCC	10	311	166	0.060241
GCCGC|GCTCC	GCCGC	GCTCC	10	268	166	0.060241
ACGCG|GGAGG	GGAGG	ACGCG	10	371	166	0.060241
TCCAC|TGCCC	TCCAC	TGCCC	10	198	166	0.060241
ACACA|GAGGC	ACACA	GAGGC	8	177	133	0.0601504
ACCCC|GCGAC	ACCCC	GCGAC	8	463	133	0.0601504
CCACC|GCGAC	CCACC	GCGAC	8	737	133	0.0601504
CCCGC|GCGAC	CCCGC	GCGAC	8	628	133	0.0601504
CCTCT|GCCAC	GCCAC	CCTCT	8	333	133	0.0601504
GCCAC|GCGAC	GCCAC	GCGAC	8	333	133	0.0601504
ACCGC|CCGCG	ACCGC	CCGCG	17	318	283	0.0600707
CCACG|CCGCG	CCACG	CCGCG	17	296	283	0.0600707
CCGCG|CTCCC	CTCCC	CCGCG	17	442	283	0.0600707
ACCCC|GCCAC	ACCCC	GCCAC	20	463	333	0.0600601
CACCC|GCCAC	CACCC	GCCAC	20	632	333	0.0600601
CCCGC|CGCAC	CCCGC	CGCAC	20	628	333	0.0600601
CGACC|CGCAC	CGACC	CGCAC	20	301	333	0.0600601
CTCAC|GCCAC	CTCAC	GCCAC	20	260	333	0.0600601
CCTTC|TCACG	CCTTC	TCACG	6	139	100	0.06
CTCCC|TCACG	CTCCC	TCACG	6	442	100	0.06
GACCC|GCACC	GCACC	GACCC	12	255	200	0.06
CCCCG|CCCCT	CCCCT	CCCCG	28	408	467	0.0599572
ACACC|CCGTC	ACACC	CCGTC	13	288	217	0.0599078
CACCC|CCGTC	CACCC	CCGTC	13	632	217	0.0599078
CCCCC|CCGTC	CCCCC	CCGTC	13	646	217	0.0599078
CGCCG|CTCCG	CGCCG	CTCCG	10	275	167	0.0598802
CTCCG|GCCCC	GCCCC	CTCCG	10	541	167	0.0598802
CAACC|CCCCA	CCCCA	CAACC	14	469	234	0.0598291
CGACC|GCCAC	GCCAC	CGACC	18	333	301	0.0598007
CCTAC|CTCCC	CTCCC	CCTAC	11	442	184	0.0597826
CCTAC|TCCCC	TCCCC	CCTAC	11	330	184	0.0597826
ACCGC|CCCCA	CCCCA	ACCGC	19	469	318	0.0597484
ACCGC|CCCCC	CCCCC	ACCGC	19	646	318	0.0597484
ACCCC|GCCGC	ACCCC	GCCGC	16	463	268	0.0597015
ACCCG|ATCCC	ACCCG	ATCCC	8	241	134	0.0597015
ATCCC|CCCTC	CCCTC	ATCCC	8	554	134	0.0597015
CCCTC|GCCGC	CCCTC	GCCGC	16	554	268	0.0597015
ATCCC|CGCCG	CGCCG	ATCCC	8	275	134	0.0597015
CCCCC|CCCTC	CCCCC	CCCTC	33	646	554	0.0595668
CCCAC|GGCCC	CCCAC	GGCCC	10	679	168	0.0595238
CCCTG|GGCCC	CCCTG	GGCCC	10	164	168	0.0595238
CTCAC|GGCCC	CTCAC	GGCCC	10	260	168	0.0595238
ACCCC|CACAC	ACCCC	CACAC	21	463	353	0.0594901
CACAC|CACCC	CACCC	CACAC	21	632	353	0.0594901
CACAC|CCCGC	CCCGC	CACAC	21	628	353	0.0594901
ACCCA|GACCA	ACCCA	GACCA	7	226	118	0.059322
CCCCG|CTCGC	CCCCG	CTCGC	14	467	236	0.059322
CCCTC|CTCGC	CCCTC	CTCGC	14	554	236	0.059322
CCCTC|GACCA	CCCTC	GACCA	7	554	118	0.059322
GACCA|GCACG	GCACG	GACCA	7	135	118	0.059322
ACACA|GGAGG	ACACA	GGAGG	22	177	371	0.0592992
CCCCC|GCACG	CCCCC	GCACG	8	646	135	0.0592593
CCGGC|GCACG	CCGGC	GCACG	8	186	135	0.0592593
CGCCC|GCACG	CGCCC	GCACG	8	697	135	0.0592593
CACCA|CCGGC	CACCA	CCGGC	11	288	186	0.0591398
CCCTC|CCGGC	CCCTC	CCGGC	11	554	186	0.0591398
ACCCC|CCACT	ACCCC	CCACT	12	463	203	0.0591133
CCACA|CCCTC	CCCTC	CCACA	16	554	271	0.0590406
CCACA|CGCCC	CGCCC	CCACA	16	697	271	0.0590406
ACACC|CCCCA	CCCCA	ACACC	17	469	288	0.0590278
ACACC|CCTGC	CCTGC	ACACC	17	198	288	0.0590278
ACACC|ACCCT	ACACC	ACCCT	12	288	204	0.0588235
CACAC|GTCCC	CACAC	GTCCC	7	353	119	0.0588235
CACAC|CGGAG	CACAC	CGGAG	6	353	102	0.0588235
ACACG|CACGC	CACGC	ACACG	10	361	170	0.0588235
CCACG|GTCCC	CCACG	GTCCC	7	296	119	0.0588235
CCCAC|CGGAG	CCCAC	CGGAG	6	679	102	0.0588235
ACACG|CCCCA	CCCCA	ACACG	10	469	170	0.0588235
CCCCA|CCCCC	CCCCA	CCCCC	38	469	646	0.0588235
CCCCA|CCCGA	CCCCA	CCCGA	12	469	204	0.0588235
CCCCA|GTCCC	CCCCA	GTCCC	7	469	119	0.0588235
CCCCC|GCACC	CCCCC	GCACC	15	646	255	0.0588235
CCCCC|CCCCG	CCCCG	CCCCC	38	467	646	0.0588235
CCCCG|CTCCC	CCCCG	CTCCC	26	467	442	0.0588235
CCCCT|CTCCC	CCCCT	CTCCC	26	408	442	0.0588235
CCCGA|CCCTC	CCCTC	CCCGA	12	554	204	0.0588235
CGCCA|CTCCC	CGCCA	CTCCC	26	311	442	0.0588235
ACACG|CGCCC	CGCCC	ACACG	10	697	170	0.0588235
ACCCT|GCCAC	GCCAC	ACCCT	12	333	204	0.0588235
GCACC|GCCCC	GCCCC	GCACC	15	541	255	0.0588235
ACCAC|CCTCC	ACCAC	CCTCC	30	325	511	0.0587084
CCCCT|CCGCC	CCCCT	CCGCC	41	408	699	0.0586552
AGCCC|GCGCC	AGCCC	GCGCC	14	163	239	0.0585774
CACCG|GCGCC	CACCG	GCGCC	14	329	239	0.0585774
CCCAC|GCGCC	CCCAC	GCGCC	14	679	239	0.0585774
GCGCC|TCCCC	TCCCC	GCGCC	14	330	239	0.0585774
CACCC|CCCAA	CACCC	CCCAA	10	632	171	0.0584795
CACCT|CCCAA	CACCT	CCCAA	10	229	171	0.0584795
CACGC|CCCAA	CACGC	CCCAA	10	361	171	0.0584795
CCCAA|CCCCT	CCCCT	CCCAA	10	408	171	0.0584795
CCCAA|CCCGC	CCCGC	CCCAA	10	628	171	0.0584795
ACCAC|CACGC	CACGC	ACCAC	19	361	325	0.0584615
ACCCC|CCCGG	ACCCC	CCCGG	8	463	137	0.0583942
CCACC|CCCGG	CCACC	CCCGG	8	737	137	0.0583942
CCCGG|CCTAC	CCTAC	CCCGG	8	184	137	0.0583942
CACGC|GCCCG	CACGC	GCCCG	15	361	257	0.0583658
CCGCC|GCCCG	CCGCC	GCCCG	15	699	257	0.0583658
AGCCC|TCCTC	AGCCC	TCCTC	7	163	120	0.0583333
CCACG|TCCTC	CCACG	TCCTC	7	296	120	0.0583333
CCCCT|TCCTC	CCCCT	TCCTC	7	408	120	0.0583333
CCGCC|TCCTC	CCGCC	TCCTC	7	699	120	0.0583333
ACACC|CGCCT	ACACC	CGCCT	12	288	206	0.0582524
CACTC|CGCCT	CACTC	CGCCT	12	198	206	0.0582524
CCCCG|CGCGG	CCCCG	CGCGG	6	467	103	0.0582524
CCCGT|CGCGG	CCCGT	CGCGG	6	191	103	0.0582524
CCGCA|CGCGG	CCGCA	CGCGG	6	265	103	0.0582524
CGCCC|CGCGG	CGCCC	CGCGG	6	697	103	0.0582524
ACGCC|TCGCC	ACGCC	TCGCC	11	294	189	0.0582011
CCATC|CGCCA	CGCCA	CCATC	11	311	189	0.0582011
TCCCC|TCGCC	TCCCC	TCGCC	11	330	189	0.0582011
ACCCC|CGCCG	ACCCC	CGCCG	16	463	275	0.0581818
CGCCG|CTCCC	CTCCC	CGCCG	16	442	275	0.0581818
ACCCC|CACGC	ACCCC	CACGC	21	463	361	0.0581717
CAACC|CTCCA	CAACC	CTCCA	10	234	172	0.0581395
CCGAC|CTCCA	CCGAC	CTCCA	10	277	172	0.0581395
CTCCA|CTCCC	CTCCC	CTCCA	10	442	172	0.0581395
ACCCG|CACAC	CACAC	ACCCG	14	353	241	0.0580913
ACCCG|GCCCG	GCCCG	ACCCG	14	257	241	0.0580913
CACGC|CCCTA	CACGC	CCCTA	9	361	155	0.0580645
CCCGT|CCCTA	CCCGT	CCCTA	9	191	155	0.0580645
CCCTA|CCGCC	CCGCC	CCCTA	9	699	155	0.0580645
CCCTA|GCCCC	GCCCC	CCCTA	9	541	155	0.0580645
ACCCC|CCTCG	ACCCC	CCTCG	12	463	207	0.057971
CCTCG|CCTGC	CCTGC	CCTCG	12	198	207	0.057971
CCTCG|CGCAC	CGCAC	CCTCG	12	333	207	0.057971
ACCCA|CCCAG	ACCCA	CCCAG	7	226	121	0.0578512
CAGCC|CCCAG	CAGCC	CCCAG	7	174	121	0.0578512
CCCAG|CCCCG	CCCCG	CCCAG	7	467	121	0.0578512
CCCAG|CCCCT	CCCCT	CCCAG	7	408	121	0.0578512
CCCAG|CCGCG	CCGCG	CCCAG	7	283	121	0.0578512
CGCCC|GACCG	CGCCC	GACCG	7	697	121	0.0578512
CCCAG|CGCGC	CGCGC	CCCAG	7	330	121	0.0578512
CCCAG|CTCAC	CTCAC	CCCAG	7	260	121	0.0578512
CCCAG|GCCCC	GCCCC	CCCAG	7	541	121	0.0578512
CCCAG|GCGCC	GCGCC	CCCAG	7	239	121	0.0578512
CCCAG|GCGCG	GCGCG	CCCAG	7	157	121	0.0578512
ACGCC|CACCG	CACCG	ACGCC	17	329	294	0.0578231
ACGCC|CCCTC	CCCTC	ACGCC	17	554	294	0.0578231
ACGCC|TCCCC	TCCCC	ACGCC	17	330	294	0.0578231
ACGCC|ACTCC	ACGCC	ACTCC	10	294	173	0.0578035
ACTCC|CACCC	CACCC	ACTCC	10	632	173	0.0578035
ACTCC|CACGC	CACGC	ACTCC	10	361	173	0.0578035
ACTCC|CCCCT	CCCCT	ACTCC	10	408	173	0.0578035
CCCTC|GCCAC	GCCAC	CCCTC	32	333	554	0.0577617
CCGAC|GCCAC	GCCAC	CCGAC	16	333	277	0.0577617
ACCCG|CACCG	ACCCG	CACCG	19	241	329	0.0577508
ACACC|CTCAC	ACACC	CTCAC	15	288	260	0.0576923
AACAC|CCACC	CCACC	AACAC	9	737	156	0.0576923
CCCCA|CTCAC	CCCCA	CTCAC	15	469	260	0.0576923
CCCTC|GACGC	CCCTC	GACGC	9	554	156	0.0576923
AACAC|GAGGG	GAGGG	AACAC	9	127	156	0.0576923
AACAC|GAGGT	GAGGT	AACAC	9	168	156	0.0576923
ACCCC|CCCGT	ACCCC	CCCGT	11	463	191	0.0575916
ACCCC|CGGCC	ACCCC	CGGCC	11	463	191	0.0575916
ACCGC|CCCGT	ACCGC	CCCGT	11	318	191	0.0575916
CACGC|CGGCC	CACGC	CGGCC	11	361	191	0.0575916
CCACC|CCCGT	CCACC	CCCGT	11	737	191	0.0575916
CCTCC|CGGCC	CCTCC	CGGCC	11	511	191	0.0575916
CCCCT|CGCGC	CCCCT	CGCGC	19	408	330	0.0575758
CCTCC|CGCGC	CCTCC	CGCGC	19	511	330	0.0575758
CCCCA|CGCGC	CGCGC	CCCCA	27	330	469	0.0575693
CCCCA|TCCCC	TCCCC	CCCCA	27	330	469	0.0575693
ACTCC|CCTTC	ACTCC	CCTTC	8	173	139	0.057554
CCCAC|CCTTC	CCCAC	CCTTC	8	679	139	0.057554
CCCGA|CCTTC	CCCGA	CCTTC	8	204	139	0.057554
CCTCG|CCTTC	CCTCG	CCTTC	8	207	139	0.057554
CCTTC|CTCAC	CTCAC	CCTTC	8	260	139	0.057554
CCTTC|GCCCG	GCCCG	CCTTC	8	257	139	0.057554
CCTTC|TCGCC	TCGCC	CCTTC	8	189	139	0.057554
ACCAC|CGCTC	ACCAC	CGCTC	13	325	226	0.0575221
ACCCA|CCCCC	CCCCC	ACCCA	13	646	226	0.0575221
ACCCA|CCCCG	CCCCG	ACCCA	13	467	226	0.0575221
CGCTC|GCCGC	GCCGC	CGCTC	13	268	226	0.0575221
ACCCA|CAGCC	ACCCA	CAGCC	10	226	174	0.0574713
AACCC|CACGC	CACGC	AACCC	10	361	174	0.0574713
CAGCC|CCCTC	CCCTC	CAGCC	10	554	174	0.0574713
AACCC|CCTCC	CCTCC	AACCC	10	511	174	0.0574713
CAGCC|CGCGC	CGCGC	CAGCC	10	330	174	0.0574713
CAGCC|GCCAC	GCCAC	CAGCC	10	333	174	0.0574713
CCACG|CCGCG	CCGCG	CCACG	17	283	296	0.0574324
ACCCC|GCGCG	ACCCC	GCGCG	9	463	157	0.0573248
AACAC|AGGAG	AACAC	AGGAG	20	156	349	0.0573066
CCCCC|CTCCC	CTCCC	CCCCC	37	442	646	0.0572755
CACCA|GGCAC	CACCA	GGCAC	6	288	105	0.0571429
CCCCC|CTGCC	CCCCC	CTGCC	10	646	175	0.0571429
CCCCG|CTGCC	CCCCG	CTGCC	10	467	175	0.0571429
CCCTC|GGCAC	CCCTC	GGCAC	6	554	105	0.0571429
CGACC|GGCAC	CGACC	GGCAC	6	301	105	0.0571429
CCCCA|CGCAC	CCCCA	CGCAC	19	469	333	0.0570571
CCGCG|CGCAC	CCGCG	CGCAC	19	283	333	0.0570571
ACCAC|CACCC	ACCAC	CACCC	36	325	632	0.056962
CACCC|CCCCT	CCCCT	CACCC	36	408	632	0.056962
CACCC|TCCCC	TCCCC	CACCC	36	330	632	0.056962
ACCAC|CTCTC	ACCAC	CTCTC	7	325	123	0.0569106
AGGAG|CACGA	AGGAG	CACGA	7	349	123	0.0569106
CACCA|CTCTC	CACCA	CTCTC	7	288	123	0.0569106
CACCC|CACGA	CACCC	CACGA	7	632	123	0.0569106
CACCT|CACGA	CACCT	CACGA	7	229	123	0.0569106
CACGA|CCCAC	CCCAC	CACGA	7	679	123	0.0569106
CCCCG|CTCTC	CCCCG	CTCTC	7	467	123	0.0569106
CCCTA|CTCCT	CCCTA	CTCCT	7	155	123	0.0569106
CCGCA|CTCCT	CCGCA	CTCCT	7	265	123	0.0569106
CACGA|CCGTC	CCGTC	CACGA	7	217	123	0.0569106
CGCCA|CTCTC	CGCCA	CTCTC	7	311	123	0.0569106
CTCCT|GCCAC	GCCAC	CTCCT	7	333	123	0.0569106
CATCC|CCGTC	CCGTC	CATCC	10	217	176	0.0568182
CATCC|CCTCC	CCTCC	CATCC	10	511	176	0.0568182
CATCC|CGCCA	CGCCA	CATCC	10	311	176	0.0568182
CATCC|GCCCA	GCCCA	CATCC	10	255	176	0.0568182
CATCC|GCCGC	GCCGC	CATCC	10	268	176	0.0568182
ACACC|CCTCA	ACACC	CCTCA	13	288	229	0.0567686
ACCCC|CACCT	ACCCC	CACCT	13	463	229	0.0567686
ACCCT|CACCT	ACCCT	CACCT	13	204	229	0.0567686
CACCG|CACCT	CACCG	CACCT	13	329	229	0.0567686
CACCT|CCCGC	CCCGC	CACCT	13	628	229	0.0567686
CACCG|GCCTC	CACCG	GCCTC	11	329	194	0.056701
ACCCC|CGTCG	ACCCC	CGTCG	6	463	106	0.0566038
ACCCG|ACCGC	ACCCG	ACCGC	18	241	318	0.0566038
AGGAC|CACAA	AGGAC	CACAA	6	149	106	0.0566038
CCCCC|CGAAC	CCCCC	CGAAC	6	646	106	0.0566038
CACAA|CCCCG	CCCCG	CACAA	6	467	106	0.0566038
CCCCG|CGTCG	CCCCG	CGTCG	6	467	106	0.0566038
CCCTA|CGTCG	CCCTA	CGTCG	6	155	106	0.0566038
CCCTC|CCGCA	CCCTC	CCGCA	15	554	265	0.0566038
CACAA|CCGCG	CCGCG	CACAA	6	283	106	0.0566038
CCGCG|CGTCG	CCGCG	CGTCG	6	283	106	0.0566038
CCGCA|CCTCC	CCTCC	CCGCA	15	511	265	0.0566038
CCTGC|CGAAC	CCTGC	CGAAC	6	198	106	0.0566038
CGAAC|GCACC	GCACC	CGAAC	6	255	106	0.0566038
CGTCG|GCCCG	GCCCG	CGTCG	6	257	106	0.0566038
CGTCG|TGCCC	TGCCC	CGTCG	6	166	106	0.0566038
CTCCC|TCCCC	TCCCC	CTCCC	25	330	442	0.0565611
CACGC|CCGCG	CACGC	CCGCG	16	361	283	0.0565371
ACCTC|CCTCC	CCTCC	ACCTC	13	511	230	0.0565217
ACCTC|CGCCG	CGCCG	ACCTC	13	275	230	0.0565217
ACACA|CCCAC	CCCAC	ACACA	10	679	177	0.0564972
CCCCA|TCCGC	CCCCA	TCCGC	10	469	177	0.0564972
ACACA|CCCTC	CCCTC	ACACA	10	554	177	0.0564972
GCCAC|TCCGC	GCCAC	TCCGC	10	333	177	0.0564972
CGACC|GCACC	GCACC	CGACC	17	255	301	0.0564784
CGACC|GCCCC	GCCCC	CGACC	17	541	301	0.0564784
ACCCC|CGTCC	ACCCC	CGTCC	11	463	195	0.0564103
CCCCA|CGTCC	CCCCA	CGTCC	11	469	195	0.0564103
CCGCC|CGTCC	CCGCC	CGTCC	11	699	195	0.0564103
CCACA|CTACC	CCACA	CTACC	9	271	160	0.05625
CCGAC|CTACC	CCGAC	CTACC	9	277	160	0.05625
ACACA|AGGAT	ACACA	AGGAT	5	177	89	0.0561798
ACCCC|CACCA	CACCA	ACCCC	26	288	463	0.0561555
ACACA|GAGGA	ACACA	GAGGA	17	177	303	0.0561056
CAACC|TCACC	CAACC	TCACC	12	234	214	0.0560748
ACGGC|CACCG	CACCG	ACGGC	6	329	107	0.0560748
ACCGA|CACGC	CACGC	ACCGA	6	361	107	0.0560748
ACGGC|CCGAC	CCGAC	ACGGC	6	277	107	0.0560748
ACGGC|CGCAC	CGCAC	ACGGC	6	333	107	0.0560748
GCCCC|TCACC	GCCCC	TCACC	12	541	214	0.0560748
ACCGA|TCCCC	TCCCC	ACCGA	6	330	107	0.0560748
ACGGC|TCGCC	TCGCC	ACGGC	6	189	107	0.0560748
CACCC|CCAAC	CACCC	CCAAC	14	632	250	0.056
CACCC|TCCCA	CACCC	TCCCA	7	632	125	0.056
CCCCA|TCCCA	CCCCA	TCCCA	7	469	125	0.056
CCCCC|TCCCA	CCCCC	TCCCA	7	646	125	0.056
CCCCG|TCCCA	CCCCG	TCCCA	7	467	125	0.056
CCCTC|TCCCA	CCCTC	TCCCA	7	554	125	0.056
CCGCG|TCCCA	CCGCG	TCCCA	7	283	125	0.056
CCGCT|TCCCA	CCGCT	TCCCA	7	180	125	0.056
GCCAC|TCCCA	GCCAC	TCCCA	7	333	125	0.056
CCCCG|CGCCC	CCCCG	CGCCC	39	467	697	0.0559541
ACCGC|ACGAC	ACCGC	ACGAC	8	318	143	0.0559441
ACGAC|CCCCC	CCCCC	ACGAC	8	646	143	0.0559441
CCCCC|CCCTT	CCCCC	CCCTT	8	646	143	0.0559441
CCCCG|CCCTT	CCCCG	CCCTT	8	467	143	0.0559441
ACGAC|CGAGG	CGAGG	ACGAC	8	131	143	0.0559441
CCCTT|CGCGC	CGCGC	CCCTT	8	330	143	0.0559441
CCCTT|CTCCC	CTCCC	CCCTT	8	442	143	0.0559441
CCCTT|GCCAC	GCCAC	CCCTT	8	333	143	0.0559441
CCCTT|GCCCC	GCCCC	CCCTT	8	541	143	0.0559441
CCCTT|TCCCC	TCCCC	CCCTT	8	330	143	0.0559441
CCCGC|GACAC	CCCGC	GACAC	9	628	161	0.0559006
CGCCC|GACAC	CGCCC	GACAC	9	697	161	0.0559006
GACAC|GAGGA	GAGGA	GACAC	9	303	161	0.0559006
CCCCG|CTCCC	CTCCC	CCCCG	26	442	467	0.0556745
AACCC|TCCAC	AACCC	TCCAC	11	174	198	0.0555556
ACCAC|GGCGC	ACCAC	GGCGC	6	325	108	0.0555556
ACCCC|CACTC	ACCCC	CACTC	11	463	198	0.0555556
ACTCC|GCCGA	ACTCC	GCCGA	6	173	108	0.0555556
CACCC|CGCAA	CACCC	CGCAA	7	632	126	0.0555556
CACTC|GCCGA	CACTC	GCCGA	6	198	108	0.0555556
CCACC|CGCAA	CCACC	CGCAA	7	737	126	0.0555556
CCACC|TCCCT	CCACC	TCCCT	8	737	144	0.0555556
CACCA|CCCCA	CCCCA	CACCA	16	469	288	0.0555556
CCCCA|GCCGA	CCCCA	GCCGA	6	469	108	0.0555556
CCCCC|GGCGC	CCCCC	GGCGC	6	646	108	0.0555556
CAACC|CCCCT	CCCCT	CAACC	13	408	234	0.0555556
CACCA|CCCCT	CCCCT	CACCA	16	408	288	0.0555556
CCCCT|CCGCT	CCCCT	CCGCT	10	408	180	0.0555556
CCCCT|CCTGC	CCCCT	CCTGC	11	408	198	0.0555556
CCCGC|CGCGA	CCCGC	CGCGA	8	628	144	0.0555556
CCCTC|TCCAC	CCCTC	TCCAC	11	554	198	0.0555556
CCTCG|GCCGA	CCTCG	GCCGA	6	207	108	0.0555556
CGCCA|GCCGA	CGCCA	GCCGA	6	311	108	0.0555556
CGCTC|TCCAC	CGCTC	TCCAC	11	226	198	0.0555556
CTCAC|GCCGA	CTCAC	GCCGA	6	260	108	0.0555556
CAACC|CTCCC	CTCCC	CAACC	13	442	234	0.0555556
GACAC|GGCGC	GACAC	GGCGC	6	161	108	0.0555556
CCGCT|GACCC	GACCC	CCGCT	10	200	180	0.0555556
CGCAA|GAGGA	GAGGA	CGCAA	7	303	126	0.0555556
CCTGC|GCCAC	GCCAC	CCTGC	11	333	198	0.0555556
CACCA|GCCCC	GCCCC	CACCA	16	541	288	0.0555556
CCTGC|GCCCC	GCCCC	CCTGC	11	541	198	0.0555556
GCCCC|TCCCT	GCCCC	TCCCT	8	541	144	0.0555556
GCCCG|TCCAC	GCCCG	TCCAC	11	257	198	0.0555556
TCCCG|TCCCT	TCCCG	TCCCT	8	148	144	0.0555556
GCCGA|TCCCT	TCCCT	GCCGA	6	144	108	0.0555556
CTGAC|GGCGC	CTGAC	GGCGC	6	95	108	0.0555556
CACCC|CCCCA	CACCC	CCCCA	26	632	469	0.0554371
ACCAC|CCCCT	CCCCT	ACCAC	18	408	325	0.0553846
CACCC|CTCCC	CTCCC	CACCC	35	442	632	0.0553797
ACCGC|CCACA	ACCGC	CCACA	15	318	271	0.0553506
ACCAC|CCGTC	ACCAC	CCGTC	12	325	217	0.0552995
CCCAC|CCGTC	CCCAC	CCGTC	12	679	217	0.0552995
ACCCA|AGCCC	ACCCA	AGCCC	9	226	163	0.0552147
ACCCG|AGCCC	ACCCG	AGCCC	9	241	163	0.0552147
ACCGC|AGCCC	ACCGC	AGCCC	9	318	163	0.0552147
AGCCC|CACCT	CACCT	AGCCC	9	229	163	0.0552147
AGCCC|CCGAC	CCGAC	AGCCC	9	277	163	0.0552147
AGCCC|CGCGC	CGCGC	AGCCC	9	330	163	0.0552147
AGCCC|CTGCC	CTGCC	AGCCC	9	175	163	0.0552147
CCCCA|CGACG	CCCCA	CGACG	8	469	145	0.0551724
CCCCG|CGACG	CCCCG	CGACG	8	467	145	0.0551724
CCCGC|CGACG	CCCGC	CGACG	8	628	145	0.0551724
CGACG|CTCCC	CTCCC	CGACG	8	442	145	0.0551724
CACAC|GAGGG	CACAC	GAGGG	7	353	127	0.0551181
CTCCC|CTCGC	CTCCC	CTCGC	13	442	236	0.0550847
ACCCC|GACCC	ACCCC	GACCC	11	463	200	0.055
CCCCG|GACCC	CCCCG	GACCC	11	467	200	0.055
AAGGA|GGAAC	AAGGA	GGAAC	5	299	91	0.0549451
ACGCA|GGAAC	ACGCA	GGAAC	5	183	91	0.0549451
CCACC|TGCAC	CCACC	TGCAC	5	737	91	0.0549451
CCCAC|TGCAC	CCCAC	TGCAC	5	679	91	0.0549451
CCCCT|TGCAC	CCCCT	TGCAC	5	408	91	0.0549451
CCTAC|TGCAC	CCTAC	TGCAC	5	184	91	0.0549451
CGCCC|TGCAC	CGCCC	TGCAC	5	697	91	0.0549451
CGCCG|TGCAC	CGCCG	TGCAC	5	275	91	0.0549451
CGCGC|TGCAC	CGCGC	TGCAC	5	330	91	0.0549451
GAGGA|GGAAC	GAGGA	GGAAC	5	303	91	0.0549451
GCACC|TGCAC	GCACC	TGCAC	5	255	91	0.0549451
GCCCT|GGAAC	GCCCT	GGAAC	5	202	91	0.0549451
TACCC|TGCAC	TACCC	TGCAC	5	130	91	0.0549451
TCCCC|TGCAC	TCCCC	TGCAC	5	330	91	0.0549451
ACCCA|GCACC	ACCCA	GCACC	14	226	255	0.054902
CACAC|GCCCA	CACAC	GCCCA	14	353	255	0.054902
CCCTC|GCACC	CCCTC	GCACC	14	554	255	0.054902
GCCAC|GCCCA	GCCAC	GCCCA	14	333	255	0.054902
GCCCA|TCCCC	TCCCC	GCCCA	14	330	255	0.054902
ACCTC|CCCTG	ACCTC	CCCTG	9	230	164	0.054878
CACAC|CCCTG	CACAC	CCCTG	9	353	164	0.054878
CACCG|CCCTG	CACCG	CCCTG	9	329	164	0.054878
CCACG|CCCTG	CCACG	CCCTG	9	296	164	0.054878
CCCAC|CCCTG	CCCAC	CCCTG	9	679	164	0.054878
CCCTG|CCGCC	CCGCC	CCCTG	9	699	164	0.054878
CCCTG|CCGCG	CCGCG	CCCTG	9	283	164	0.054878
CCCTG|CGCAC	CGCAC	CCCTG	9	333	164	0.054878
CCCTG|GGCGC	GGCGC	CCCTG	9	108	164	0.054878
ACCCC|CACCG	ACCCC	CACCG	18	463	329	0.0547112
CACCG|CACGC	CACGC	CACCG	18	361	329	0.0547112
CACCG|CCCCC	CCCCC	CACCG	18	646	329	0.0547112
CACCG|CCCCG	CCCCG	CACCG	18	467	329	0.0547112
CACCG|CTCCC	CTCCC	CACCG	18	442	329	0.0547112
CACCG|GCCCC	GCCCC	CACCG	18	541	329	0.0547112
ACGCA|CTCCC	CTCCC	ACGCA	10	442	183	0.0546448
ACACC|TCCCC	ACACC	TCCCC	18	288	330	0.0545455
CCCAC|TCCCC	TCCCC	CCCAC	37	330	679	0.0544919
ACCCA|GCCCG	ACCCA	GCCCG	14	226	257	0.0544747
ACCCG|GCCCG	ACCCG	GCCCG	14	241	257	0.0544747
ACCGC|GCCCG	ACCGC	GCCCG	14	318	257	0.0544747
CCGAC|GCCCG	CCGAC	GCCCG	14	277	257	0.0544747
CGCAC|GCCCG	CGCAC	GCCCG	14	333	257	0.0544747
CGCGC|GCCCG	CGCGC	GCCCG	14	330	257	0.0544747
GCCCC|GCCCG	GCCCC	GCCCG	14	541	257	0.0544747
AGGAG|CAACA	AGGAG	CAACA	8	349	147	0.0544218
CACCG|CCAGC	CACCG	CCAGC	8	329	147	0.0544218
CAACA|CCACA	CCACA	CAACA	8	271	147	0.0544218
CAACA|CCCCC	CCCCC	CAACA	8	646	147	0.0544218
ACGCC|CCCGC	CCCGC	ACGCC	16	628	294	0.0544218
CAACA|CCCGC	CCCGC	CAACA	8	628	147	0.0544218
CAACA|GCCCC	GCCCC	CAACA	8	541	147	0.0544218
CCAGC|GCGCC	GCGCC	CCAGC	8	239	147	0.0544218
CCAGC|TCACC	TCACC	CCAGC	8	214	147	0.0544218
CCCCA|GCGCC	CCCCA	GCGCC	13	469	239	0.0543933
CCCGC|GCGCC	CCCGC	GCGCC	13	628	239	0.0543933
ACGCC|CCTAC	ACGCC	CCTAC	10	294	184	0.0543478
CACCA|CCTAC	CACCA	CCTAC	10	288	184	0.0543478
CACCA|GCCAA	CACCA	GCCAA	5	288	92	0.0543478
CACGC|CCTAC	CACGC	CCTAC	10	361	184	0.0543478
CCACA|CCTAC	CCACA	CCTAC	10	271	184	0.0543478
CCACA|GCCAA	CCACA	GCCAA	5	271	92	0.0543478
CCCAC|GCCAA	CCCAC	GCCAA	5	679	92	0.0543478
CCCCC|GCCAA	CCCCC	GCCAA	5	646	92	0.0543478
CCTCC|GCCAA	CCTCC	GCCAA	5	511	92	0.0543478
CCTAC|GCCAC	GCCAC	CCTAC	10	333	184	0.0543478
GCCAA|TCCCC	TCCCC	GCCAA	5	330	92	0.0543478
CACCC|GCAAC	CACCC	GCAAC	7	632	129	0.0542636
CCCCA|GCAAC	CCCCA	GCAAC	7	469	129	0.0542636
CCCCG|GCAAC	CCCCG	GCAAC	7	467	129	0.0542636
CCCCT|GCAAC	CCCCT	GCAAC	7	408	129	0.0542636
CCGAC|GCAAC	CCGAC	GCAAC	7	277	129	0.0542636
CGCCC|GCAAC	CGCCC	GCAAC	7	697	129	0.0542636
ACGCG|CCCCA	CCCCA	ACGCG	9	469	166	0.0542169
CCCTC|TGCCC	CCCTC	TGCCC	9	554	166	0.0542169
CGACC|GCTCC	CGACC	GCTCC	9	301	166	0.0542169
CACCG|CCACT	CACCG	CCACT	11	329	203	0.0541872
CCACT|CCCCA	CCCCA	CCACT	11	469	203	0.0541872
CCACT|CGCCG	CGCCG	CCACT	11	275	203	0.0541872
CCACT|CGCTC	CGCTC	CCACT	11	226	203	0.0541872
CCACT|CTCCC	CTCCC	CCACT	11	442	203	0.0541872
CCCTC|CCCTC	CCCTC	CCCTC	30	554	554	0.0541516
CCCTC|TCCCC	TCCCC	CCCTC	30	330	554	0.0541516
ACCGC|CCCGC	ACCGC	CCCGC	34	318	628	0.0541401
CACCA|CCCGC	CACCA	CCCGC	34	288	628	0.0541401
CACCG|CCCGC	CACCG	CCCGC	34	329	628	0.0541401
ACACT|ACCCC	ACCCC	ACACT	6	463	111	0.0540541
CACCA|TCCCG	CACCA	TCCCG	8	288	148	0.0540541
CCCAC|GCACA	CCCAC	GCACA	8	679	148	0.0540541
CCCCC|CGCAC	CCCCC	CGCAC	18	646	333	0.0540541
CCCCC|GCACA	CCCCC	GCACA	8	646	148	0.0540541
CCCCC|GCCAC	CCCCC	GCCAC	18	646	333	0.0540541
ACCAA|CCCCG	CCCCG	ACCAA	6	467	111	0.0540541
[truncated: 23,395 more rows]

## Sheet: 6
Motifs	Motif 1	Motif 2	Coincidence	Motif 1 incidence	Motif 2 incidence	Co-occurrence metric
CCACCC|TGCCCT	CCACCC	TGCCCT	6	298	29	0.206897
AACACA|AGGAGG	AGGAGG	AACACA	6	184	30	0.2
CCGCCC|CCTTTC	CCGCCC	CCTTTC	5	336	30	0.166667
CACGCC|GGCCGC	CACGCC	GGCCGC	5	153	34	0.147059
ACACGC|GGACGC	ACACGC	GGACGC	4	70	29	0.137931
AGCCAC|GCCCAC	GCCCAC	AGCCAC	6	130	44	0.136364
CGCCCC|CGTCAC	CGCCCC	CGTCAC	4	292	30	0.133333
CGACTC|GCCCCA	GCCCCA	CGACTC	4	123	30	0.133333
CTGCCT|GGCCCC	GGCCCC	CTGCCT	4	58	30	0.133333
AACACA|TAGGAG	TAGGAG	AACACA	4	32	30	0.133333
ACCCAA|CCCTCC	CCCTCC	ACCCAA	5	259	38	0.131579
ACTCCC|CCCTAA	ACTCCC	CCCTAA	4	73	31	0.129032
CGCCCC|CTGCCG	CGCCCC	CTGCCG	4	292	31	0.129032
ACTCCC|GCCCTA	ACTCCC	GCCCTA	4	73	32	0.125
CACCAC|CGGCGC	CACCAC	CGGCGC	5	163	40	0.125
ACGACA|CCCCCG	CCCCCG	ACGACA	4	145	32	0.125
CCTGAC|CGGCGC	CCTGAC	CGGCGC	5	44	40	0.125
CTCCCC|GCCCTA	CTCCCC	GCCCTA	4	188	32	0.125
CACTCA|GCACCC	GCACCC	CACTCA	4	108	32	0.125
GCCCTA|TCCCCT	TCCCCT	GCCCTA	4	63	32	0.125
AACACA|TAGGAG	AACACA	TAGGAG	4	30	32	0.125
CCTCCC|TACCAC	CCTCCC	TACCAC	4	229	33	0.121212
CGACCC|TGCCAC	CGACCC	TGCCAC	4	109	33	0.121212
CCACAG|CCCGCC	CCCGCC	CCACAG	5	319	42	0.119048
ACGCTC|CCGCGA	CCGCGA	ACGCTC	5	55	42	0.119048
CGCCCC|TCTCCC	CGCCCC	TCTCCC	5	292	42	0.119048
CACCCC|TCACAC	CACCCC	TCACAC	5	242	43	0.116279
ACCACC|CCCTGA	ACCACC	CCCTGA	4	132	35	0.114286
ACCGGC|CCCTGA	ACCGGC	CCCTGA	4	44	35	0.114286
CACCAC|CCCTGA	CACCAC	CCCTGA	4	163	35	0.114286
CACCGG|CCCTGA	CACCGG	CCCTGA	4	45	35	0.114286
CCACCC|GCGACG	CCACCC	GCGACG	4	298	35	0.114286
CCACCC|TCACCT	CCACCC	TCACCT	4	298	35	0.114286
CCACCG|CCCTGA	CCACCG	CCCTGA	4	150	35	0.114286
CCCTGA|CCGGCC	CCGGCC	CCCTGA	4	81	35	0.114286
CCCTGA|CCGGCG	CCGGCG	CCCTGA	4	38	35	0.114286
CCCTGA|CGGCGC	CGGCGC	CCCTGA	4	40	35	0.114286
GCCACC|TCACCT	GCCACC	TCACCT	4	133	35	0.114286
ACGCAA|GGAGGA	GGAGGA	ACGCAA	4	119	35	0.114286
CCACCC|GTCCCC	CCACCC	GTCCCC	5	298	44	0.113636
CCACCG|CCTGAC	CCACCG	CCTGAC	5	150	44	0.113636
AGCCAC|CCCTCC	CCCTCC	AGCCAC	5	259	44	0.113636
CCTGAC|CGGCGC	CGGCGC	CCTGAC	5	40	44	0.113636
CCGCCC|GCCAAC	CCGCCC	GCCAAC	5	336	45	0.111111
CCGCGT|CGCACA	CGCACA	CCGCGT	5	74	45	0.111111
CGCCAC|TGCCCG	CGCCAC	TGCCCG	4	176	36	0.111111
ACTCCC|CCCGCC	CCCGCC	ACTCCC	8	319	73	0.109589
CACCGC|GACCCA	CACCGC	GACCCA	4	179	37	0.108108
CCCCGC|GACACG	CCCCGC	GACACG	4	259	37	0.108108
CCCGCC|GTCCAC	CCCGCC	GTCCAC	4	319	37	0.108108
CCCGCC|TCCACA	CCCGCC	TCCACA	4	319	37	0.108108
CCGCCC|CGCTCA	CCGCCC	CGCTCA	4	336	37	0.108108
ACCAAC|ACCCCC	ACCCCC	ACCAAC	6	150	56	0.107143
CGCCAA|CGCCCC	CGCCCC	CGCCAA	5	292	47	0.106383
ACACCA|CCGGCG	ACACCA	CCGGCG	4	60	38	0.105263
CCACCC|GCTCAC	CCACCC	GCTCAC	4	298	38	0.105263
ACCCAA|CCACCT	CCACCT	ACCCAA	4	109	38	0.105263
CCCTGA|CCGGCG	CCCTGA	CCGGCG	4	35	38	0.105263
ACCCAA|CCTCCA	CCTCCA	ACCCAA	4	96	38	0.105263
CCGGCG|CCTGAC	CCTGAC	CCGGCG	4	44	38	0.105263
CCGGCG|GACACC	GACACC	CCGGCG	4	46	38	0.105263
CACACG|GGACGC	CACACG	GGACGC	3	64	29	0.103448
CAACTC|CCCCGC	CCCCGC	CAACTC	3	259	29	0.103448
CAACTC|CCCGCC	CCCGCC	CAACTC	3	319	29	0.103448
CCTCCC|GGACGC	CCTCCC	GGACGC	3	229	29	0.103448
CTCCAC|TGCCCT	CTCCAC	TGCCCT	3	97	29	0.103448
TCCACC|TGCCCT	TCCACC	TGCCCT	3	93	29	0.103448
ACCCCC|GCCCGT	ACCCCC	GCCCGT	4	150	39	0.102564
ACCACT|CACAGC	CACAGC	ACCACT	4	42	39	0.102564
CCCTCC|TCGCGC	CCCTCC	TCGCGC	4	259	39	0.102564
ACCACT|GCACCC	GCACCC	ACCACT	4	108	39	0.102564
GCGCCC|TCGCGC	GCGCCC	TCGCGC	4	90	39	0.102564
ACCCCC|CACCAA	ACCCCC	CACCAA	5	150	49	0.102041
CACCAA|CACCCC	CACCCC	CACCAA	5	242	49	0.102041
AACACA|AAGGAG	AAGGAG	AACACA	3	209	30	0.1
ACACCA|CGGCGC	ACACCA	CGGCGC	4	60	40	0.1
ACCACC|GAGCCC	ACCACC	GAGCCC	3	132	30	0.1
AGGAAT|CAACAA	AGGAAT	CAACAA	3	40	30	0.1
AGGCCC|CTGCCT	AGGCCC	CTGCCT	3	41	30	0.1
CACACC|GAGCCC	CACACC	GAGCCC	3	132	30	0.1
AACACG|CACGCC	CACGCC	AACACG	3	153	30	0.1
CAGCCC|CTGCCT	CAGCCC	CTGCCT	3	83	30	0.1
CCACAC|GCAACA	CCACAC	GCAACA	3	136	30	0.1
CCACTA|CCTTTC	CCACTA	CCTTTC	3	44	30	0.1
CCAGCC|CTGCCT	CCAGCC	CTGCCT	3	73	30	0.1
CCCAGC|CTGCCT	CCCAGC	CTGCCT	3	61	30	0.1
CCCCAG|CTGCCT	CCCCAG	CTGCCT	3	42	30	0.1
ACAGCC|CCCGCC	CCCGCC	ACAGCC	4	319	40	0.1
CACCAT|CCCGCC	CCCGCC	CACCAT	3	319	30	0.1
CCCGCC|GACAAC	CCCGCC	GACAAC	3	319	30	0.1
CCCTGA|CGGCGC	CCCTGA	CGGCGC	4	35	40	0.1
ACAGCC|CCGCCC	CCGCCC	ACAGCC	4	336	40	0.1
CACCAT|CCGCCC	CCGCCC	CACCAT	3	336	30	0.1
CCGCCC|CGACTC	CCGCCC	CGACTC	3	336	30	0.1
CCGCCG|TCCGCA	CCGCCG	TCCGCA	4	109	40	0.1
CGACCC|GTCGCC	CGACCC	GTCGCC	3	109	30	0.1
ACCCCG|CGCCCC	CGCCCC	ACCCCG	9	292	90	0.1
CGCCCC|GACCCC	CGCCCC	GACCCC	7	292	70	0.1
CGACTC|CGCCCC	CGCCCC	CGACTC	3	292	30	0.1
CGGCGC|GACACC	GACACC	CGGCGC	4	46	40	0.1
ACTCAC|GCACCC	GCACCC	ACTCAC	4	108	40	0.1
CTGCCT|GCCCCA	GCCCCA	CTGCCT	3	123	30	0.1
CGTCCT|GCCCCA	GCCCCA	CGTCCT	3	123	30	0.1
AACACA|GGAGGA	GGAGGA	AACACA	3	119	30	0.1
AACACA|GGAGGC	GGAGGC	AACACA	3	85	30	0.1
AACACA|GGAGGG	GGAGGG	AACACA	3	68	30	0.1
CACCAT|GGCGCG	GGCGCG	CACCAT	3	35	30	0.1
CCTCCC|GGCCCG	CCTCCC	GGCCCG	5	229	51	0.0980392
CACCCA|GCCCAG	CACCCA	GCCCAG	4	116	41	0.097561
CCACCA|CTCACA	CCACCA	CTCACA	4	132	41	0.097561
CCACCC|GCCTCG	CCACCC	GCCTCG	4	298	41	0.097561
CCCACC|GCCTCG	CCCACC	GCCTCG	4	321	41	0.097561
AACCAC|CCCCTC	CCCCTC	AACCAC	4	218	41	0.097561
CCGCCC|CTCACA	CCGCCC	CTCACA	4	336	41	0.097561
CGCCCC|GCCCAG	CGCCCC	GCCCAG	4	292	41	0.097561
CTCACA|GCACCC	GCACCC	CTCACA	4	108	41	0.097561
AGGCCC|GCCCCT	GCCCCT	AGGCCC	4	86	41	0.097561
AAGGAG|GGAACA	AAGGAG	GGAACA	3	209	31	0.0967742
ACCAGC|CACCCC	CACCCC	ACCAGC	3	242	31	0.0967742
CACTCC|CCCGAG	CACTCC	CCCGAG	3	88	31	0.0967742
CCCCGA|TACACG	CCCCGA	TACACG	3	57	31	0.0967742
CCCCTT|CCCTAA	CCCCTT	CCCTAA	3	56	31	0.0967742
CCCGAC|TACACG	CCCGAC	TACACG	3	127	31	0.0967742
CCCTAA|CCCTTC	CCCTTC	CCCTAA	3	58	31	0.0967742
CCGCAC|CGAGCC	CCGCAC	CGAGCC	3	141	31	0.0967742
CCCTAA|CCGCCG	CCGCCG	CCCTAA	3	109	31	0.0967742
CGCCGC|TGCACA	CGCCGC	TGCACA	3	134	31	0.0967742
CCCTAA|CTCCCC	CTCCCC	CCCTAA	3	188	31	0.0967742
GAAGGA|GGAACA	GAAGGA	GGAACA	3	110	31	0.0967742
GACGCC|TACACG	GACGCC	TACACG	3	52	31	0.0967742
CTGCCG|GCCCCT	GCCCCT	CTGCCG	3	86	31	0.0967742
CCCTAA|TCCCCT	TCCCCT	CCCTAA	3	63	31	0.0967742
CACCCA|CAGCCC	CACCCA	CAGCCC	8	116	83	0.0963855
CACCCA|CCAGCC	CACCCA	CCAGCC	7	116	73	0.0958904
AAGGAG|GAACAC	AAGGAG	GAACAC	4	209	42	0.0952381
ACCACT|CACAGC	ACCACT	CACAGC	4	39	42	0.0952381
AGGAGG|GAACAC	AGGAGG	GAACAC	4	184	42	0.0952381
CACAGC|CACCAC	CACCAC	CACAGC	4	163	42	0.0952381
CACAGC|CCACCA	CCACCA	CACAGC	4	132	42	0.0952381
CCCGCC|CCTCCT	CCCGCC	CCTCCT	6	319	63	0.0952381
CACAGC|CCGCCC	CCGCCC	CACAGC	4	336	42	0.0952381
CACGTC|CCGCCC	CCGCCC	CACGTC	4	336	42	0.0952381
CCGCCC|TCTCCC	CCGCCC	TCTCCC	4	336	42	0.0952381
ACGCTC|GACCGC	GACCGC	ACGCTC	4	50	42	0.0952381
CCGACG|CCGCCC	CCGCCC	CCGACG	5	336	53	0.0943396
CCGACG|CGCCCC	CGCCCC	CCGACG	5	292	53	0.0943396
AGCCCA|ATCACC	AGCCCA	ATCACC	3	35	32	0.09375
CACCAC|CCGTCA	CACCAC	CCGTCA	3	163	32	0.09375
ATCACC|CAGCCC	CAGCCC	ATCACC	3	83	32	0.09375
CCACCC|CCTCCA	CCACCC	CCTCCA	9	298	96	0.09375
CCACCC|CGCCTC	CCACCC	CGCCTC	9	298	96	0.09375
ATCACC|CCAGCC	CCAGCC	ATCACC	3	73	32	0.09375
ACTGCC|CCCACC	CCCACC	ACTGCC	3	321	32	0.09375
CCCACC|TTCCCC	CCCACC	TTCCCC	3	321	32	0.09375
ATCACC|CCCAGC	CCCAGC	ATCACC	3	61	32	0.09375
CCCCTT|GCCCTA	CCCCTT	GCCCTA	3	56	32	0.09375
ATCACC|CCCGCC	CCCGCC	ATCACC	3	319	32	0.09375
CCCGCC|CCGTGC	CCCGCC	CCGTGC	3	319	32	0.09375
CCCTCC|CCTGCA	CCCTCC	CCTGCA	3	259	32	0.09375
CCCTTC|GCCCTA	CCCTTC	GCCCTA	3	58	32	0.09375
ACTGCC|CCGCAT	CCGCAT	ACTGCC	3	33	32	0.09375
ACGACA|CCGCCC	CCGCCC	ACGACA	3	336	32	0.09375
ATCACC|CCGCCC	CCGCCC	ATCACC	3	336	32	0.09375
ACGACA|CCGCCT	CCGCCT	ACGACA	3	91	32	0.09375
CCGCCT|CCGTGC	CCGCCT	CCGTGC	3	91	32	0.09375
CCTCCC|CCTGCA	CCTCCC	CCTGCA	3	229	32	0.09375
ACGACA|CGCCTC	CGCCTC	ACGACA	3	96	32	0.09375
CCGTGC|CGCCTC	CGCCTC	CCGTGC	3	96	32	0.09375
ATCACC|GCCCAG	GCCCAG	ATCACC	3	41	32	0.09375
ACGACA|GCCGCC	GCCGCC	ACGACA	3	109	32	0.09375
GCCTCC|TTCCCC	GCCTCC	TTCCCC	3	72	32	0.09375
CCACCC|TCACAC	CCACCC	TCACAC	4	298	43	0.0930233
CCCACC|TCACAC	CCCACC	TCACAC	4	321	43	0.0930233
GACCTC|GCCCGC	GCCCGC	GACCTC	4	108	43	0.0930233
CGACAC|CGCCCC	CGCCCC	CGACAC	6	292	65	0.0923077
ACCACA|GCTCCG	ACCACA	GCTCCG	3	59	33	0.0909091
ACCACC|CCTGAC	ACCACC	CCTGAC	4	132	44	0.0909091
ACCCGT|ACCGCC	ACCGCC	ACCCGT	3	137	33	0.0909091
ACCGGC|CCTGAC	ACCGGC	CCTGAC	4	44	44	0.0909091
ACGCTC|CCGCGA	ACGCTC	CCGCGA	5	42	55	0.0909091
ACTGCC|CCGCAT	ACTGCC	CCGCAT	3	32	33	0.0909091
AGGAGG|CTGCAC	AGGAGG	CTGCAC	4	184	44	0.0909091
CACACA|CACGGA	CACACA	CACGGA	3	69	33	0.0909091
ACCCGT|CACACC	CACACC	ACCCGT	3	132	33	0.0909091
CAAACC|CACACC	CACACC	CAAACC	3	132	33	0.0909091
CACACC|CGCCTA	CACACC	CGCCTA	3	132	33	0.0909091
ACCCGT|CACCGC	CACCGC	ACCCGT	3	179	33	0.0909091
CACCGG|CCTGAC	CACCGG	CCTGAC	4	45	44	0.0909091
ACACTC|CACGCC	CACGCC	ACACTC	3	153	33	0.0909091
CATCGC|TGCCAC	CATCGC	TGCCAC	3	38	33	0.0909091
CCACAC|GCTCCG	CCACAC	GCTCCG	3	136	33	0.0909091
CCACCG|GCGCCT	CCACCG	GCGCCT	3	150	33	0.0909091
CCACCG|TACCAC	CCACCG	TACCAC	3	150	33	0.0909091
CCAAAC|CCCACC	CCCACC	CCAAAC	3	321	33	0.0909091
CCCACC|CGCCTA	CCCACC	CGCCTA	3	321	33	0.0909091
CCCACC|GCGCCT	CCCACC	GCGCCT	3	321	33	0.0909091
CCCCAC|GCTCCG	CCCCAC	GCTCCG	3	289	33	0.0909091
CCCCCA|GCGCCT	CCCCCA	GCGCCT	3	138	33	0.0909091
ACCCGT|CCCCCC	CCCCCC	ACCCGT	3	162	33	0.0909091
CCCCGC|GCCCGG	CCCCGC	GCCCGG	3	259	33	0.0909091
CAAACC|CCCCTC	CCCCTC	CAAACC	3	218	33	0.0909091
CCAAAC|CCCCTC	CCCCTC	CCAAAC	3	218	33	0.0909091
CCCGCG|GCCCTG	CCCGCG	GCCCTG	3	101	33	0.0909091
CAAACC|CCCTCC	CCCTCC	CAAACC	3	259	33	0.0909091
CCAAAC|CCCTCC	CCCTCC	CCAAAC	3	259	33	0.0909091
ACCGGC|CCCTGA	CCCTGA	ACCGGC	4	35	44	0.0909091
CCAAAC|CCGCCC	CCGCCC	CCAAAC	3	336	33	0.0909091
ACGCCG|CCGCGC	CCGCGC	ACGCCG	6	129	66	0.0909091
CCGGCG|CCTGAC	CCGGCG	CCTGAC	4	38	44	0.0909091
CCTCCC|GCCCGG	CCTCCC	GCCCGG	3	229	33	0.0909091
AGCCAC|CCTCCG	CCTCCG	AGCCAC	4	86	44	0.0909091
CCTCGA|GACGCA	CCTCGA	GACGCA	3	39	33	0.0909091
ACCGGC|CCTGAC	CCTGAC	ACCGGC	4	44	44	0.0909091
ATGGAG|CGACGC	CGACGC	ATGGAG	2	80	22	0.0909091
CGCCCA|CTCGCG	CGCCCA	CTCGCG	4	140	44	0.0909091
CACGGC|CGCCCC	CGCCCC	CACGGC	4	292	44	0.0909091
CGCCGC|GCTCCG	CGCCGC	GCTCCG	3	134	33	0.0909091
CTCCCG|GCCCGG	CTCCCG	GCCCGG	3	75	33	0.0909091
CAAACC|CTCCGC	CTCCGC	CAAACC	3	86	33	0.0909091
ACCGGC|GACACC	GACACC	ACCGGC	4	46	44	0.0909091
ATGGAG|GACGCG	GACGCG	ATGGAG	2	39	22	0.0909091
CACGGC|GCCCCC	GCCCCC	CACGGC	4	174	44	0.0909091
CCGCAT|GCCGCC	GCCGCC	CCGCAT	3	109	33	0.0909091
ATGGAG|GCGACG	GCGACG	ATGGAG	2	35	22	0.0909091
GGCGCG|TGCCAC	GGCGCG	TGCCAC	3	35	33	0.0909091
TCACCT|TGCCAC	TCACCT	TGCCAC	3	35	33	0.0909091
CCCACC|TCACCG	CCCACC	TCACCG	4	321	45	0.0888889
CACCGG|CCCTGA	CCCTGA	CACCGG	4	35	45	0.0888889
CACCGG|CCTGAC	CCTGAC	CACCGG	4	44	45	0.0888889
CTCCCC|GCAACC	CTCCCC	GCAACC	4	188	45	0.0888889
ACCTCG|CTCGCC	CTCGCC	ACCTCG	4	107	45	0.0888889
ACCCAC|CCATCA	ACCCAC	CCATCA	3	135	34	0.0882353
ACCCCC|CGCACT	ACCCCC	CGCACT	3	150	34	0.0882353
CACCCA|CCATCA	CACCCA	CCATCA	3	116	34	0.0882353
CACCGC|CGCACT	CACCGC	CGCACT	3	179	34	0.0882353
CACTCC|GCCTTC	CACTCC	GCCTTC	3	88	34	0.0882353
CCACAC|CCATCA	CCACAC	CCATCA	3	136	34	0.0882353
CCACGC|GGCCGC	CCACGC	GGCCGC	3	148	34	0.0882353
CCACTA|CCCTTT	CCACTA	CCCTTT	3	44	34	0.0882353
CCCCTC|CCCTTT	CCCCTC	CCCTTT	3	218	34	0.0882353
CCCTCA|CCCTTT	CCCTCA	CCCTTT	3	97	34	0.0882353
CCCTTT|CCGCCC	CCGCCC	CCCTTT	3	336	34	0.0882353
CGAACC|CGACCT	CGACCT	CGAACC	3	45	34	0.0882353
CGACGC|GCCTTC	CGACGC	GCCTTC	3	80	34	0.0882353
CCAGCG|CGCCCG	CGCCCG	CCAGCG	3	123	34	0.0882353
CGCCTC|GGCCGC	CGCCTC	GGCCGC	3	96	34	0.0882353
ACGTCC|GACCCC	GACCCC	ACGTCC	3	70	34	0.0882353
GCCCCC|TCGCTC	GCCCCC	TCGCTC	3	174	34	0.0882353
ACCGGC|GACACC	ACCGGC	GACACC	4	44	46	0.0869565
CCGCCT|CGTGCC	CCGCCT	CGTGCC	4	91	46	0.0869565
CCGGCG|GACACC	CCGGCG	GACACC	4	38	46	0.0869565
CGCCTC|CGTGCC	CGCCTC	CGTGCC	4	96	46	0.0869565
CGGCGC|GACACC	CGGCGC	GACACC	4	40	46	0.0869565
CGTGCC|CTCGCC	CTCGCC	CGTGCC	4	107	46	0.0869565
ACACCG|CCCCCG	CCCCCG	ACACCG	5	145	58	0.0862069
ACCATC|GGCGCG	ACCATC	GGCGCG	3	35	35	0.0857143
ACGCAA|AGGAGG	AGGAGG	ACGCAA	3	184	35	0.0857143
AGCCCA|ATCACC	ATCACC	AGCCCA	3	32	35	0.0857143
CACCCG|GCGACG	CACCCG	GCGACG	3	126	35	0.0857143
AGCCCA|CATCAC	CATCAC	AGCCCA	3	39	35	0.0857143
CATCGC|GGCGCG	CATCGC	GGCGCG	3	38	35	0.0857143
CCACCA|GGCGCG	CCACCA	GGCGCG	3	132	35	0.0857143
CCATCG|GGCGCG	CCATCG	GGCGCG	3	40	35	0.0857143
ACCATC|CCCACC	CCCACC	ACCATC	3	321	35	0.0857143
CCCACC|CGCATC	CCCACC	CGCATC	3	321	35	0.0857143
CCCACC|GCGACG	CCCACC	GCGACG	3	321	35	0.0857143
CCACTG|CCCACG	CCCACG	CCACTG	3	118	35	0.0857143
ACCATC|CCCCCG	CCCCCG	ACCATC	3	145	35	0.0857143
CACCTA|CCCCGC	CCCCGC	CACCTA	3	259	35	0.0857143
CCCGCC|CGCATC	CCCGCC	CGCATC	3	319	35	0.0857143
CCCGCC|CTCGCT	CCCGCC	CTCGCT	3	319	35	0.0857143
CCCGCC|TCCGCG	CCCGCC	TCCGCG	3	319	35	0.0857143
CCCTGA|GGCGCG	CCCTGA	GGCGCG	3	35	35	0.0857143
CCCTGA|CCGCCC	CCGCCC	CCCTGA	3	336	35	0.0857143
CCGCCC|GCGCTC	CCGCCC	GCGCTC	3	336	35	0.0857143
CCGCCG|CGCATC	CCGCCG	CGCATC	3	109	35	0.0857143
CCTACA|CTGACC	CCTACA	CTGACC	3	41	35	0.0857143
CCCTGA|CGCACA	CGCACA	CCCTGA	3	74	35	0.0857143
ACCTAC|CGCACC	CGCACC	ACCTAC	3	145	35	0.0857143
CGCCCC|CTCGCT	CGCCCC	CTCGCT	3	292	35	0.0857143
CGCCCC|TCCCCG	CGCCCC	TCCCCG	6	292	70	0.0857143
AGCCCA|CGCGCC	CGCGCC	AGCCCA	3	135	35	0.0857143
ACCATC|CGTGCC	CGTGCC	ACCATC	3	46	35	0.0857143
ACGCAA|GAGGTC	GAGGTC	ACGCAA	3	44	35	0.0857143
GCCACC|GGCGCG	GCCACC	GGCGCG	3	133	35	0.0857143
GCCCAG|GCCGTC	GCCCAG	GCCGTC	3	41	35	0.0857143
CACCTA|GCCCCG	GCCCCG	CACCTA	3	117	35	0.0857143
CGTCCA|GCCCCT	GCCCCT	CGTCCA	3	86	35	0.0857143
ACGCAA|GGAGGT	GGAGGT	ACGCAA	3	98	35	0.0857143
ACCATC|GGCGCG	GGCGCG	ACCATC	3	35	35	0.0857143
CCCTGA|GGCGCG	GGCGCG	CCCTGA	3	35	35	0.0857143
AGCCCA|TCACCC	TCACCC	AGCCCA	3	80	35	0.0857143
GGCGCG|TGCCAC	TGCCAC	GGCGCG	3	33	35	0.0857143
TCACCT|TGCCAC	TGCCAC	TCACCT	3	33	35	0.0857143
CACCAT|GGCGCG	CACCAT	GGCGCG	3	30	35	0.0857143
CCCCAC|CCTACC	CCCCAC	CCTACC	7	289	82	0.0853659
CCCCGC|CGCCAA	CCCCGC	CGCCAA	4	259	47	0.0851064
CCCCTC|GACACA	CCCCTC	GACACA	4	218	47	0.0851064
CCCGCC|CGCCAA	CCCGCC	CGCCAA	4	319	47	0.0851064
CCGCCC|CGCCAA	CCGCCC	CGCCAA	4	336	47	0.0851064
CGGCAC|TCGACC	CGGCAC	TCGACC	4	51	47	0.0851064
CCAACC|GCCCCC	GCCCCC	CCAACC	9	174	106	0.0849057
CCTCAC|GCCACA	CCTCAC	GCCACA	5	139	59	0.0847458
ACACCT|CCGCGG	ACACCT	CCGCGG	3	48	36	0.0833333
ACCCAC|GACCCG	ACCCAC	GACCCG	3	135	36	0.0833333
ACCCCC|TCACCA	ACCCCC	TCACCA	3	150	36	0.0833333
AGGAGG|CCAACA	AGGAGG	CCAACA	4	184	48	0.0833333
CACGCC|CACGCT	CACGCC	CACGCT	3	153	36	0.0833333
CATCCC|CCACCC	CCACCC	CATCCC	6	298	72	0.0833333
CCATCC|CGCCAT	CCATCC	CGCCAT	4	81	48	0.0833333
ACATCC|CCCACC	CCCACC	ACATCC	3	321	36	0.0833333
CCCCAC|GCCCAT	CCCCAC	GCCCAT	3	289	36	0.0833333
ACACCT|CCCCCA	CCCCCA	ACACCT	4	138	48	0.0833333
CCACGT|CCCCCA	CCCCCA	CCACGT	3	138	36	0.0833333
CCCCTC|TCACCA	CCCCTC	TCACCA	3	218	36	0.0833333
CCGCCC|GCCTCC	CCGCCC	GCCTCC	6	336	72	0.0833333
CCGCCC|GACCCG	CCGCCC	GACCCG	3	336	36	0.0833333
CACGCT|CCGCGA	CCGCGA	CACGCT	3	55	36	0.0833333
CCTCCC|GCCATC	CCTCCC	GCCATC	3	229	36	0.0833333
CGCCCC|GCCATC	CGCCCC	GCCATC	3	292	36	0.0833333
GCCACG|TGCCCG	GCCACG	TGCCCG	3	71	36	0.0833333
CCAGCC|TCACCC	TCACCC	CCAGCC	6	80	73	0.0821918
CACCCA|GACCAC	CACCCA	GACCAC	5	116	61	0.0819672
CCCAGC|TCACCC	TCACCC	CCCAGC	5	80	61	0.0819672
CCCCAT|CGCGCT	CCCCAT	CGCGCT	4	53	49	0.0816327
CGCCCC|GCCCCT	CGCCCC	GCCCCT	7	292	86	0.0813953
CCACCC|CGCTCA	CCACCC	CGCTCA	3	298	37	0.0810811
CCCACC|CCGAGC	CCCACC	CCGAGC	3	321	37	0.0810811
CCCCCG|GACACG	CCCCCG	GACACG	3	145	37	0.0810811
ACGGCC|CCCGCG	CCCGCG	ACGGCC	3	101	37	0.0810811
ACCCTA|CCCGTC	CCCGTC	ACCCTA	3	107	37	0.0810811
CCGCAC|GCCGGC	CCGCAC	GCCGGC	3	141	37	0.0810811
AACGCC|CCGCCC	CCGCCC	AACGCC	3	336	37	0.0810811
CCGCCC|TCCACA	CCGCCC	TCCACA	3	336	37	0.0810811
CCTCCC|GTCCAC	CCTCCC	GTCCAC	3	229	37	0.0810811
CGCACC|GCCGGC	CGCACC	GCCGGC	3	145	37	0.0810811
CGCCCA|CGCTCA	CGCCCA	CGCTCA	3	140	37	0.0810811
CGCCCG|CGCTCA	CGCCCG	CGCTCA	3	123	37	0.0810811
CGCCCG|TCCACA	CGCCCG	TCCACA	3	123	37	0.0810811
CGGCAC|GACCCA	CGGCAC	GACCCA	3	51	37	0.0810811
CGCTCA|CTCCAC	CTCCAC	CGCTCA	3	97	37	0.0810811
AACGCC|CTGCCC	CTGCCC	AACGCC	3	78	37	0.0810811
GACCCA|GCACCG	GCACCG	GACCCA	3	55	37	0.0810811
AACGCC|GCCCCA	GCCCCA	AACGCC	3	123	37	0.0810811
ACGCTC|GACCGC	ACGCTC	GACCGC	4	42	50	0.08
CCAACG|CCCCGC	CCCCGC	CCAACG	4	259	50	0.08
ACCCCC|CGCCCC	CGCCCC	ACCCCC	12	292	150	0.08
CAACCA|GCCCCC	GCCCCC	CAACCA	4	174	50	0.08
CACTCC|CCTCCC	CCTCCC	CACTCC	7	229	88	0.0795455
CCGCCC|TCCCCA	CCGCCC	TCCCCA	5	336	63	0.0793651
CCTGCC|TCCCCA	CCTGCC	TCCCCA	5	95	63	0.0793651
CGCCCT|TCCCCT	CGCCCT	TCCCCT	5	111	63	0.0793651
TCCCCA|TGCCCC	TGCCCC	TCCCCA	5	66	63	0.0793651
ACCCGC|CATCGC	ACCCGC	CATCGC	3	118	38	0.0789474
AGGAGG|CACTGC	AGGAGG	CACTGC	3	184	38	0.0789474
CACTGC|CCCCAC	CCCCAC	CACTGC	3	289	38	0.0789474
CCCCTC|TGCCGC	CCCCTC	TGCCGC	3	218	38	0.0789474
CACTGC|CCCGCC	CCCGCC	CACTGC	3	319	38	0.0789474
CACTGC|CCCTCC	CCCTCC	CACTGC	3	259	38	0.0789474
CCTCAC|TGCCGC	CCTCAC	TGCCGC	3	139	38	0.0789474
ACCTGC|CCTCCC	CCTCCC	ACCTGC	3	229	38	0.0789474
CACTGC|CCTCCC	CCTCCC	CACTGC	3	229	38	0.0789474
CATCGC|CGACCC	CGACCC	CATCGC	3	109	38	0.0789474
CGCCCC|TGCCGC	CGCCCC	TGCCGC	3	292	38	0.0789474
AACCCG|CGCGCC	CGCGCC	AACCCG	3	135	38	0.0789474
CATCGC|CGTGCC	CGTGCC	CATCGC	3	46	38	0.0789474
ACCCAA|CTCCAC	CTCCAC	ACCCAA	3	97	38	0.0789474
ACCCAA|GACCAC	GACCAC	ACCCAA	3	61	38	0.0789474
CCGGCG|GCACGC	GCACGC	CCGGCG	3	66	38	0.0789474
GCCCCT|TGCCGC	GCCCCT	TGCCGC	3	86	38	0.0789474
GCCCGC|GCTCAC	GCCCGC	GCTCAC	3	108	38	0.0789474
CATCGC|GGCGCG	GGCGCG	CATCGC	3	35	38	0.0789474
ACCTGC|TCACCG	TCACCG	ACCTGC	3	45	38	0.0789474
ACCCAA|TCCACC	TCCACC	ACCCAA	3	93	38	0.0789474
CATCGC|TGCCAC	TGCCAC	CATCGC	3	33	38	0.0789474
CCACCA|TCCTCC	CCACCA	TCCTCC	4	132	51	0.0784314
ACCCGA|CCACCC	CCACCC	ACCCGA	4	298	51	0.0784314
CCACCC|GCCCTC	CCACCC	GCCCTC	8	298	102	0.0784314
GCCCCC|TCCCCC	GCCCCC	TCCCCC	8	174	102	0.0784314
GCCCCC|TCCTCC	GCCCCC	TCCTCC	4	174	51	0.0784314
CGGCAC|TCGACC	TCGACC	CGGCAC	4	47	51	0.0784314
ACACGC|GCCCGT	ACACGC	GCCCGT	3	70	39	0.0769231
ACAGCC|CCACAA	ACAGCC	CCACAA	3	40	39	0.0769231
ACCCAC|CACCGA	ACCCAC	CACCGA	4	135	52	0.0769231
ACGCGC|GCCCGT	ACGCGC	GCCCGT	3	74	39	0.0769231
AGCCCA|CATCAC	AGCCCA	CATCAC	3	35	39	0.0769231
CACCCC|CATCAC	CACCCC	CATCAC	3	242	39	0.0769231
CACCGC|GCCCGT	CACCGC	GCCCGT	3	179	39	0.0769231
CACGCG|GCCCGT	CACGCG	GCCCGT	3	72	39	0.0769231
CAGCCC|CATCAC	CAGCCC	CATCAC	3	83	39	0.0769231
CCACCC|GCCCGT	CCACCC	GCCCGT	3	298	39	0.0769231
ACCACT|CCACCG	CCACCG	ACCACT	3	150	39	0.0769231
CATCAC|CCAGCC	CCAGCC	CATCAC	3	73	39	0.0769231
CACCGA|CCCACC	CCCACC	CACCGA	4	321	52	0.0769231
CCCACC|CTGCCC	CCCACC	CTGCCC	6	321	78	0.0769231
CATCAC|CCCAGC	CCCAGC	CATCAC	3	61	39	0.0769231
CAACAC|CCCCAC	CCCCAC	CAACAC	5	289	65	0.0769231
CCCCAC|CCGACA	CCCCAC	CCGACA	4	289	52	0.0769231
CCCCAC|CGACAC	CCCCAC	CGACAC	5	289	65	0.0769231
CCCCCG|CGACAC	CCCCCG	CGACAC	5	145	65	0.0769231
CAACAC|CCCGCC	CCCGCC	CAACAC	5	319	65	0.0769231
CCCGCC|CGCCGG	CCCGCC	CGCCGG	3	319	39	0.0769231
CATCAC|CCGACC	CCGACC	CATCAC	3	131	39	0.0769231
CCGCCC|TCGCGC	CCGCCC	TCGCGC	3	336	39	0.0769231
CCGCCT|CGACAC	CCGCCT	CGACAC	5	91	65	0.0769231
AGCCCC|CCTCCC	CCTCCC	AGCCCC	5	229	65	0.0769231
CCTCCC|TCGCGC	CCTCCC	TCGCGC	3	229	39	0.0769231
CGCCCA|TCGCGC	CGCCCA	TCGCGC	3	140	39	0.0769231
CGCCCT|TCGCGC	CGCCCT	TCGCGC	3	111	39	0.0769231
CGACAC|CGCCTC	CGCCTC	CGACAC	5	96	65	0.0769231
CGCGCG|GCCCGT	CGCGCG	GCCCGT	3	77	39	0.0769231
CTCCCC|GACGCC	CTCCCC	GACGCC	4	188	52	0.0769231
CCTCGA|GACGCA	GACGCA	CCTCGA	3	33	39	0.0769231
GCCCAC|TCGCGC	GCCCAC	TCGCGC	3	130	39	0.0769231
CATCAC|GCCCAG	GCCCAG	CATCAC	3	41	39	0.0769231
CGACAC|GCCCCC	GCCCCC	CGACAC	5	174	65	0.0769231
CGACAC|GCCGCC	GCCGCC	CGACAC	5	109	65	0.0769231
GACGCG|GGGAGG	GGGAGG	GACGCG	3	57	39	0.0769231
ACCACT|TCCACC	TCCACC	ACCACT	3	93	39	0.0769231
CCCACG|CCGCCC	CCGCCC	CCCACG	9	336	118	0.0762712
ACGCCG|CCCACC	CCCACC	ACGCCG	5	321	66	0.0757576
CCCACC|TGCCCC	CCCACC	TGCCCC	5	321	66	0.0757576
CCACCA|CCCGCC	CCCGCC	CCACCA	10	319	132	0.0757576
CTCCCC|TGCCCC	CTCCCC	TGCCCC	5	188	66	0.0757576
TCCCCA|TGCCCC	TCCCCA	TGCCCC	5	63	66	0.0757576
AACACC|CACCGC	CACCGC	AACACC	4	179	53	0.0754717
CACCGC|CCCCAT	CACCGC	CCCCAT	4	179	53	0.0754717
CACGCA|CGCGTC	CACGCA	CGCGTC	4	79	53	0.0754717
CCACTC|CGCCGA	CCACTC	CGCCGA	4	98	53	0.0754717
CCCCAA|CCGACG	CCCCAA	CCGACG	4	58	53	0.0754717
CGCACA|CGCGTC	CGCACA	CGCGTC	4	74	53	0.0754717
CCAACC|CGCCCC	CGCCCC	CCAACC	8	292	106	0.0754717
CCCCAT|CGCGCT	CGCGCT	CCCCAT	4	49	53	0.0754717
CCGACG|GCCCTC	GCCCTC	CCGACG	4	102	53	0.0754717
ACACCT|TCCGCA	ACACCT	TCCGCA	3	48	40	0.075
ACCGCC|ACTCAC	ACCGCC	ACTCAC	3	137	40	0.075
ACGCCT|ACTCCC	ACTCCC	ACGCCT	3	73	40	0.075
ACAACA|AGAGGA	AGAGGA	ACAACA	3	60	40	0.075
AGGAAT|CAACAA	CAACAA	AGGAAT	3	30	40	0.075
CACACC|GACCCT	CACACC	GACCCT	3	132	40	0.075
ACGCCT|CACTCC	CACTCC	ACGCCT	3	88	40	0.075
ACAGCC|CCACAA	CCACAA	ACAGCC	3	39	40	0.075
CCAGCC|TCACCC	CCAGCC	TCACCC	6	73	80	0.075
CCACGG|CCATCC	CCATCC	CCACGG	3	81	40	0.075
ACAGCC|CCCACC	CCCACC	ACAGCC	3	321	40	0.075
CCACGG|CCCATC	CCCATC	CCACGG	3	78	40	0.075
CCCGAC|CGCTAC	CCCGAC	CGCTAC	3	127	40	0.075
ACAGCC|CCGCAA	CCGCAA	ACAGCC	3	44	40	0.075
CCGCCC|TCACCC	CCGCCC	TCACCC	6	336	80	0.075
CCATCG|CCTCCC	CCTCCC	CCATCG	3	229	40	0.075
ACGCCT|CCTTCC	CCTTCC	ACGCCT	3	60	40	0.075
CGACGC|CTCGAC	CGACGC	CTCGAC	3	80	40	0.075
CCATCG|CGTGCC	CGTGCC	CCATCG	3	46	40	0.075
CTTCCC|TCGCCA	CTTCCC	TCGCCA	3	43	40	0.075
CCATCG|GGCGCG	GGCGCG	CCATCG	3	35	40	0.075
CCCGTC|CGCAAC	CCCGTC	CGCAAC	5	107	67	0.0746269
ACCACG|CCCTCC	CCCTCC	ACCACG	5	259	67	0.0746269
ACCACG|CCTCCC	CCTCCC	ACCACG	5	229	67	0.0746269
CCTCCC|CGCAAC	CCTCCC	CGCAAC	5	229	67	0.0746269
ACCACG|CTCCCC	CTCCCC	ACCACG	5	188	67	0.0746269
CCCACC|CCGCTC	CCCACC	CCGCTC	7	321	94	0.0744681
ACCCAC|GCCCGC	ACCCAC	GCCCGC	8	135	108	0.0740741
CACCCA|GCCCGC	CACCCA	GCCCGC	8	116	108	0.0740741
ACCGCA|CCCACC	CCCACC	ACCGCA	4	321	54	0.0740741
CCCCCG|CCCCTA	CCCCCG	CCCCTA	4	145	54	0.0740741
CCCCTA|CCCTCC	CCCTCC	CCCCTA	4	259	54	0.0740741
ACCGAC|CGCCCC	CGCCCC	ACCGAC	4	292	54	0.0740741
TCCCGC|TCCCTC	TCCCTC	TCCCGC	6	82	81	0.0740741
CACGCC|CTACCC	CACGCC	CTACCC	5	153	68	0.0735294
CCCGAC|CTACCC	CCCGAC	CTACCC	5	127	68	0.0735294
CGGCCC|TCACCC	TCACCC	CGGCCC	5	80	68	0.0735294
CACGCC|CCTCGC	CACGCC	CCTCGC	8	153	109	0.0733945
CCCACC|CCTCGC	CCCACC	CCTCGC	8	321	109	0.0733945
AACACC|CGTCCG	AACACC	CGTCCG	3	53	41	0.0731707
ACCCCC|CGCCCG	ACCCCC	CGCCCG	9	150	123	0.0731707
ACCGCG|CGCTCG	ACCGCG	CGCTCG	3	61	41	0.0731707
AGCCCC|AGGCCC	AGCCCC	AGGCCC	3	65	41	0.0731707
ATCACC|GCCCAG	ATCACC	GCCCAG	3	32	41	0.0731707
CAACAC|CGTCCG	CAACAC	CGTCCG	3	65	41	0.0731707
CACCCC|CTCACA	CACCCC	CTCACA	3	242	41	0.0731707
AGGCCC|CACCTC	CACCTC	AGGCCC	3	116	41	0.0731707
CACGCC|CCCTAC	CACGCC	CCCTAC	6	153	82	0.0731707
CACGCC|GCCTCG	CACGCC	GCCTCG	3	153	41	0.0731707
AGGCCC|CAGCCC	CAGCCC	AGGCCC	3	83	41	0.0731707
CATCAC|GCCCAG	CATCAC	GCCCAG	3	39	41	0.0731707
CCACCC|CTCACA	CCACCC	CTCACA	3	298	41	0.0731707
CCACCC|CTCACC	CCACCC	CTCACC	9	298	123	0.0731707
CCACCC|GTGCCC	CCACCC	GTGCCC	3	298	41	0.0731707
CCACGC|GCCTCG	CCACGC	GCCTCG	3	148	41	0.0731707
CCCACC|CCTACC	CCCACC	CCTACC	6	321	82	0.0731707
CCCACC|CTCACA	CCCACC	CTCACA	3	321	41	0.0731707
AGGCCC|CCCCTG	CCCCTG	AGGCCC	3	63	41	0.0731707
CCCGCC|CTCACA	CCCGCC	CTCACA	3	319	41	0.0731707
CCCGCC|GGCACC	CCCGCC	GGCACC	3	319	41	0.0731707
CCCGCC|GTGCCC	CCCGCC	GTGCCC	3	319	41	0.0731707
CCCGCC|TCCCTC	CCCGCC	TCCCTC	6	319	82	0.0731707
AACCAC|CCCTCC	CCCTCC	AACCAC	3	259	41	0.0731707
CCCTCC|CTCACA	CCCTCC	CTCACA	3	259	41	0.0731707
CCCTCC|GGCACC	CCCTCC	GGCACC	3	259	41	0.0731707
AGGCCC|CCCTGC	CCCTGC	AGGCCC	3	84	41	0.0731707
CCCTGC|CCGAAC	CCCTGC	CCGAAC	3	84	41	0.0731707
CCGCCC|GCCCAG	CCGCCC	GCCCAG	3	336	41	0.0731707
CCGCGA|CGCTCG	CCGCGA	CGCTCG	3	55	41	0.0731707
CCTCCC|GGCACC	CCTCCC	GGCACC	3	229	41	0.0731707
CCTCCC|TCCCTC	CCTCCC	TCCCTC	6	229	82	0.0731707
AGGCCC|CCTGCC	CCTGCC	AGGCCC	3	95	41	0.0731707
AACCAC|CGACCC	CGACCC	AACCAC	3	109	41	0.0731707
CGCCAC|TCCCTC	CGCCAC	TCCCTC	6	176	82	0.0731707
CGCCCA|CTCACA	CGCCCA	CTCACA	3	140	41	0.0731707
AGGCCC|CTCCTC	CTCCTC	AGGCCC	3	62	41	0.0731707
CCTACA|CTGACC	CTGACC	CCTACA	3	35	41	0.0731707
AGGCCC|CTGCCT	CTGCCT	AGGCCC	3	30	41	0.0731707
GCCCAG|GCCGTC	GCCGTC	GCCCAG	3	35	41	0.0731707
CACATC|GGAGGA	GGAGGA	CACATC	3	119	41	0.0731707
GCCCAG|TCACCC	TCACCC	GCCCAG	3	80	41	0.0731707
TCCCGC|TCCCTC	TCCCGC	TCCCTC	6	81	82	0.0731707
GCCCAG|TCCGCC	TCCGCC	GCCCAG	3	76	41	0.0731707
CACCCC|CCTCCA	CACCCC	CCTCCA	7	242	96	0.0729167
CCACCC|GCGCAC	CCACCC	GCGCAC	4	298	55	0.0727273
CCCCCC|GCGCAC	CCCCCC	GCGCAC	4	162	55	0.0727273
CGACCC|GCACCG	CGACCC	GCACCG	4	109	55	0.0727273
GCGCAC|TCCCCC	TCCCCC	GCGCAC	4	102	55	0.0727273
AAGGAG|CCCAAA	AAGGAG	CCCAAA	2	209	28	0.0714286
ACACCA|GAACAC	ACACCA	GAACAC	3	60	42	0.0714286
ACCACA|GAACAC	ACCACA	GAACAC	3	59	42	0.0714286
ACCGCG|ACGCTC	ACCGCG	ACGCTC	3	61	42	0.0714286
ACCGCG|CCACAG	ACCGCG	CCACAG	3	61	42	0.0714286
AGGAGG|GCCCAA	AGGAGG	GCCCAA	3	184	42	0.0714286
AGGAGG|CCCAAA	AGGAGG	CCCAAA	2	184	28	0.0714286
CACACC|CCCAAA	CACACC	CCCAAA	2	132	28	0.0714286
CACCCC|CCCCAG	CACCCC	CCCCAG	3	242	42	0.0714286
ACGCTC|CACGCC	CACGCC	ACGCTC	3	153	42	0.0714286
CACGCC|CGGCCG	CACGCC	CGGCCG	3	153	42	0.0714286
CCACAG|CCACCC	CCACCC	CCACAG	3	298	42	0.0714286
CCACCC|GCCCAA	CCACCC	GCCCAA	3	298	42	0.0714286
CCACCC|CCCAAA	CCACCC	CCCAAA	2	298	28	0.0714286
CCACCC|GCAACG	CCACCC	GCAACG	2	298	28	0.0714286
CCCACC|TCCCCG	CCCACC	TCCCCG	5	321	70	0.0714286
CCCAAA|CCCACC	CCCACC	CCCAAA	2	321	28	0.0714286
ACACGC|CCCCAC	CCCCAC	ACACGC	5	289	70	0.0714286
CCCCCG|GCTCGC	CCCCCG	GCTCGC	3	145	42	0.0714286
CCCCGC|TCTCCC	CCCCGC	TCTCCC	3	259	42	0.0714286
CCCCAG|CCCCTG	CCCCTG	CCCCAG	3	63	42	0.0714286
CCCGAC|CGGCCG	CCCGAC	CGGCCG	3	127	42	0.0714286
CACAGC|CCCGCC	CCCGCC	CACAGC	3	319	42	0.0714286
CCCGCC|TCTCCC	CCCGCC	TCTCCC	3	319	42	0.0714286
CCCCAG|CCCTGC	CCCTGC	CCCCAG	3	84	42	0.0714286
CCACAG|CCGCCC	CCGCCC	CCACAG	3	336	42	0.0714286
CCGCCC|GACCCC	CCGCCC	GACCCC	5	336	70	0.0714286
CCTCCC|TCTCCC	CCTCCC	TCTCCC	3	229	42	0.0714286
CCCCAG|CCTGCC	CCTGCC	CCCCAG	3	95	42	0.0714286
CAGCGC|CGCCCG	CGCCCG	CAGCGC	3	123	42	0.0714286
ACGCTC|CGCCCT	CGCCCT	ACGCTC	3	111	42	0.0714286
CCACAG|CTCCCT	CTCCCT	CCACAG	3	79	42	0.0714286
CCCCAG|CTGCCT	CTGCCT	CCCCAG	3	30	42	0.0714286
GAACAC|GAAGGA	GAAGGA	GAACAC	3	110	42	0.0714286
CCCAAA|GAGGAT	GAGGAT	CCCAAA	2	65	28	0.0714286
GAACAC|GAGGTA	GAGGTA	GAACAC	3	75	42	0.0714286
GCAACG|GCCACC	GCCACC	GCAACG	2	133	28	0.0714286
GCAACG|GCCCCA	GCCCCA	GCAACG	2	123	28	0.0714286
CCCCAG|GCCTCC	GCCTCC	CCCCAG	3	72	42	0.0714286
CACGTC|GCGCGC	GCGCGC	CACGTC	3	66	42	0.0714286
CCACAG|GCGCGC	GCGCGC	CCACAG	3	66	42	0.0714286
CCCAAA|GGAGGA	GGAGGA	CCCAAA	2	119	28	0.0714286
CCCCAG|TCCCGC	TCCCGC	CCCCAG	3	81	42	0.0714286
CCACAG|TCCCTC	TCCCTC	CCACAG	3	82	42	0.0714286
TCCTCC|TCTCCC	TCCTCC	TCTCCC	3	51	42	0.0714286
CGCGGC|TGCCCC	TGCCCC	CGCGGC	3	66	42	0.0714286
ACCTCC|CCCGCC	CCCGCC	ACCTCC	6	319	85	0.0705882
ACACCG|GCCTCA	ACACCG	GCCTCA	3	58	43	0.0697674
ACCCCG|TCACAC	ACCCCG	TCACAC	3	90	43	0.0697674
CCCCCT|GCCTCA	CCCCCT	GCCTCA	3	123	43	0.0697674
CCCCTC|GCCTCA	CCCCTC	GCCTCA	3	218	43	0.0697674
CCCGAC|GACCTC	CCCGAC	GACCTC	3	127	43	0.0697674
CCCGAC|TCACAC	CCCGAC	TCACAC	3	127	43	0.0697674
CCCGCC|GACCTC	CCCGCC	GACCTC	3	319	43	0.0697674
CCCGCC|GCCCCT	CCCGCC	GCCCCT	6	319	86	0.0697674
CCCTCC|GCCTCA	CCCTCC	GCCTCA	3	259	43	0.0697674
CCGACC|TCACAC	CCGACC	TCACAC	3	131	43	0.0697674
CCGCGC|GCCTCA	CCGCGC	GCCTCA	3	129	43	0.0697674
CCTCCC|TCACAC	CCTCCC	TCACAC	3	229	43	0.0697674
CGACAC|GCCTCA	CGACAC	GCCTCA	3	65	43	0.0697674
CGACCT|TCACAC	CGACCT	TCACAC	3	45	43	0.0697674
CGCCCA|TCACAC	CGCCCA	TCACAC	3	140	43	0.0697674
CGCCCG|GACCTC	CGCCCG	GACCTC	3	123	43	0.0697674
CGCCTC|CTTCCC	CGCCTC	CTTCCC	3	96	43	0.0697674
CTCACG|CTTCCC	CTCACG	CTTCCC	3	51	43	0.0697674
CTCGCC|CTTCCC	CTCGCC	CTTCCC	3	107	43	0.0697674
GACACC|GCCTCA	GACACC	GCCTCA	3	46	43	0.0697674
GCCCAC|TCACAC	GCCCAC	TCACAC	3	130	43	0.0697674
GACCTC|GCCCGA	GCCCGA	GACCTC	3	59	43	0.0697674
GCCCGA|TCACAC	GCCCGA	TCACAC	3	59	43	0.0697674
GACCTC|GGCCCG	GGCCCG	GACCTC	3	51	43	0.0697674
GGCCCG|TCACAC	GGCCCG	TCACAC	3	51	43	0.0697674
CTTCCC|TCGCCA	TCGCCA	CTTCCC	3	40	43	0.0697674
CACCCC|CATCCC	CACCCC	CATCCC	5	242	72	0.0694444
CCACCA|CCCGCT	CCACCA	CCCGCT	5	132	72	0.0694444
CACGCG|CCCTCC	CCCTCC	CACGCG	5	259	72	0.0694444
CCCGCT|CGCCCG	CGCCCG	CCCGCT	5	123	72	0.0694444
CCGCCC|GCCCAC	CCGCCC	GCCCAC	9	336	130	0.0692308
CGCCCC|CTCCCC	CGCCCC	CTCCCC	13	292	188	0.0691489
AAGGAG|TACGCC	AAGGAG	TACGCC	2	209	29	0.0689655
ACCCCA|TGCCCT	ACCCCA	TGCCCT	2	98	29	0.0689655
ACCCGA|GGAACG	ACCCGA	GGAACG	2	51	29	0.0689655
ACACGA|ACCGCG	ACCGCG	ACACGA	2	61	29	0.0689655
ACCTCC|TGCCCT	ACCTCC	TGCCCT	2	85	29	0.0689655
ACGGCC|CAACTC	ACGGCC	CAACTC	2	37	29	0.0689655
CACCCC|CCCCCG	CACCCC	CCCCCG	10	242	145	0.0689655
CACCCC|TGCCCT	CACCCC	TGCCCT	2	242	29	0.0689655
CACCCG|TGCCCT	CACCCG	TGCCCT	2	126	29	0.0689655
CACCCT|TGCCCT	CACCCT	TGCCCT	2	96	29	0.0689655
CACCTC|TGCCCT	CACCTC	TGCCCT	2	116	29	0.0689655
CACGCA|GGACGC	CACGCA	GGACGC	2	79	29	0.0689655
ACACCG|CACGCC	CACGCC	ACACCG	4	153	58	0.0689655
CACCCA|CAGCCC	CAGCCC	CACCCA	8	83	116	0.0689655
CAGCCC|GGAACG	CAGCCC	GGAACG	2	83	29	0.0689655
ACACGA|CCACCC	CCACCC	ACACGA	2	298	29	0.0689655
CCACCG|TACGCC	CCACCG	TACGCC	2	150	29	0.0689655
CCACTA|GAGGCG	CCACTA	GAGGCG	2	44	29	0.0689655
ACACGA|CCCACC	CCCACC	ACACGA	2	321	29	0.0689655
CCCACG|CCCCAA	CCCACG	CCCCAA	4	118	58	0.0689655
CCCCAA|TGCCCT	CCCCAA	TGCCCT	2	58	29	0.0689655
ACACGA|CCCCCG	CCCCCG	ACACGA	2	145	29	0.0689655
CAACTC|CCCCCG	CCCCCG	CAACTC	2	145	29	0.0689655
ACACGA|CCCCGT	CCCCGT	ACACGA	2	69	29	0.0689655
CCCGAC|TGCCCT	CCCGAC	TGCCCT	2	127	29	0.0689655
ACGCCA|CCCGCC	CCCGCC	ACGCCA	4	319	58	0.0689655
ACACGA|CCCGCC	CCCGCC	ACACGA	2	319	29	0.0689655
CCCTGA|GGAACG	CCCTGA	GGAACG	2	35	29	0.0689655
CCCTTC|GGAACG	CCCTTC	GGAACG	2	58	29	0.0689655
CCCCAA|CCGACG	CCGACG	CCCCAA	4	53	58	0.0689655
CCGACG|TGCCCT	CCGACG	TGCCCT	2	53	29	0.0689655
ACACGA|CCGCGC	CCGCGC	ACACGA	2	129	29	0.0689655
CCGCGC|TGCCCT	CCGCGC	TGCCCT	2	129	29	0.0689655
ACACGA|CCGTCC	CCGTCC	ACACGA	2	107	29	0.0689655
CAACTC|CCGTGC	CCGTGC	CAACTC	2	32	29	0.0689655
CCTCCA|TGCCCT	CCTCCA	TGCCCT	2	96	29	0.0689655
CCTGCC|TACGCC	CCTGCC	TACGCC	2	95	29	0.0689655
CAACTC|CCTTCC	CCTTCC	CAACTC	2	60	29	0.0689655
CGCAGC|GGAACG	CGCAGC	GGAACG	2	38	29	0.0689655
CGCATC|GGACGC	CGCATC	GGACGC	2	35	29	0.0689655
ACGCCA|CGCCCC	CGCCCC	ACGCCA	4	292	58	0.0689655
CCCTTC|CGCCCC	CGCCCC	CCCTTC	4	292	58	0.0689655
CCCTTC|CGCCCT	CGCCCT	CCCTTC	4	111	58	0.0689655
CAACTC|CGGAGG	CGGAGG	CAACTC	2	57	29	0.0689655
CAACTC|CGGCCT	CGGCCT	CAACTC	2	33	29	0.0689655
CTCCCC|TGCCCT	CTCCCC	TGCCCT	2	188	29	0.0689655
CTGCCT|GGCCCC	CTGCCT	GGCCCC	4	30	58	0.0689655
CAACTC|CTTCCC	CTTCCC	CAACTC	2	43	29	0.0689655
ACACGA|GAGGAG	GAGGAG	ACACGA	2	65	29	0.0689655
GCAGCC|GGAACG	GCAGCC	GGAACG	2	33	29	0.0689655
GCCACC|TGCCCT	GCCACC	TGCCCT	2	133	29	0.0689655
GCCCAC|TACGCC	GCCCAC	TACGCC	2	130	29	0.0689655
CAACTC|GCCCCC	GCCCCC	CAACTC	2	174	29	0.0689655
CAACTC|GCCCCG	GCCCCG	CAACTC	2	117	29	0.0689655
GCCCCT|GGCCCC	GCCCCT	GGCCCC	4	86	58	0.0689655
CACCCA|GCCCGC	GCCCGC	CACCCA	8	108	116	0.0689655
GCCCTG|GGAACG	GCCCTG	GGAACG	2	33	29	0.0689655
CAACTC|GCCTTC	GCCTTC	CAACTC	2	34	29	0.0689655
GGAGAC|TGCCCT	GGAGAC	TGCCCT	2	44	29	0.0689655
GGAACG|TGCCGC	TGCCGC	GGAACG	2	38	29	0.0689655
CCCTCC|CCGCCA	CCCTCC	CCGCCA	9	259	131	0.0687023
CACCCC|CCAGCC	CACCCC	CCAGCC	5	242	73	0.0684932
AAGGAG|CTGCAC	AAGGAG	CTGCAC	3	209	44	0.0681818
ACAGCC|CCGCAA	ACAGCC	CCGCAA	3	40	44	0.0681818
ACCGAC|CTGCAC	ACCGAC	CTGCAC	3	54	44	0.0681818
ACGCAA|GAGGTC	ACGCAA	GAGGTC	3	35	44	0.0681818
AGGAGG|CCACTA	AGGAGG	CCACTA	3	184	44	0.0681818
CACACT|CACCAC	CACCAC	CACACT	3	163	44	0.0681818
CACACT|CACGCC	CACGCC	CACACT	3	153	44	0.0681818
ACCACC|CCACCC	CCACCC	ACCACC	9	298	132	0.0681818
CCACCC|CTCGCG	CCACCC	CTCGCG	3	298	44	0.0681818
CCCACC|CCTGAC	CCCACC	CCTGAC	3	321	44	0.0681818
CCCACC|GTCCCC	CCCACC	GTCCCC	3	321	44	0.0681818
CCCACG|GCCACT	CCCACG	GCCACT	3	118	44	0.0681818
CCCCAC|GTCCCC	CCCCAC	GTCCCC	3	289	44	0.0681818
CACTCC|CCCCCC	CCCCCC	CACTCC	6	162	88	0.0681818
CCACCA|CCCCGC	CCCCGC	CCACCA	9	259	132	0.0681818
CCCCGC|CTCGCG	CCCCGC	CTCGCG	3	259	44	0.0681818
AGCCAC|CCCCTC	CCCCTC	AGCCAC	3	218	44	0.0681818
CACTCC|CCCGCC	CCCGCC	CACTCC	6	319	88	0.0681818
CACGGC|CCCGCG	CCCGCG	CACGGC	3	101	44	0.0681818
CACACT|CCCTCC	CCCTCC	CACACT	3	259	44	0.0681818
CCACTA|CCCTTT	CCCTTT	CCACTA	3	34	44	0.0681818
CCGACC|CTGCAC	CCGACC	CTGCAC	3	131	44	0.0681818
AGCCAC|CCGCCC	CCGCCC	AGCCAC	3	336	44	0.0681818
CCGCTC|GTCCCC	CCGCTC	GTCCCC	3	94	44	0.0681818
CCGCAA|CCTCCC	CCTCCC	CCGCAA	3	229	44	0.0681818
CCTCCC|CTGCAC	CCTCCC	CTGCAC	3	229	44	0.0681818
ACCGGC|CGCACC	CGCACC	ACCGGC	3	145	44	0.0681818
CGCACC|CTCGCG	CGCACC	CTCGCG	3	145	44	0.0681818
CGCGCC|CTCGCG	CGCGCC	CTCGCG	3	135	44	0.0681818
ACCCCT|CTCCCC	CTCCCC	ACCCCT	6	188	88	0.0681818
AGCCAC|GCCGAC	GCCGAC	AGCCAC	3	48	44	0.0681818
CTCGCG|TGCCCC	TGCCCC	CTCGCG	3	66	44	0.0681818
CCACTA|CCTTTC	CCTTTC	CCACTA	3	30	44	0.0681818
ACCACA|CACCGC	CACCGC	ACCACA	4	179	59	0.0677966
AACCCC|CCCGCC	CCCGCC	AACCCC	4	319	59	0.0677966
ACCCGC|CCGCCC	CCGCCC	ACCCGC	8	336	118	0.0677966
AACCCC|CTCCCC	CTCCCC	AACCCC	4	188	59	0.0677966
ACGCGC|CCACCG	CCACCG	ACGCGC	5	150	74	0.0675676
CCGCGT|CGCACA	CCGCGT	CGCACA	5	45	74	0.0675676
AACCCG|CGACTC	AACCCG	CGACTC	2	38	30	0.0666667
AACACG|AAGGAG	AAGGAG	AACACG	2	209	30	0.0666667
ACACAA|GACGGC	ACACAA	GACGGC	2	36	30	0.0666667
AACACG|ACACAC	ACACAC	AACACG	2	80	30	0.0666667
AACACG|ACACCA	ACACCA	AACACG	2	60	30	0.0666667
ACACCT|GAGCCC	ACACCT	GAGCCC	2	48	30	0.0666667
AACACG|ACCACA	ACCACA	AACACG	2	59	30	0.0666667
ACCACG|CGTCAC	ACCACG	CGTCAC	2	67	30	0.0666667
ACCCAC|CCGCGT	ACCCAC	CCGCGT	3	135	45	0.0666667
ACCCAC|GCCGCT	ACCCAC	GCCGCT	2	135	30	0.0666667
ACCCCC|CACCAT	ACCCCC	CACCAT	2	150	30	0.0666667
ACCCCC|GTCGCC	ACCCCC	GTCGCC	2	150	30	0.0666667
ACCCCG|CAGCCA	ACCCCG	CAGCCA	2	90	30	0.0666667
ACCCCG|GTCGCC	ACCCCG	GTCGCC	2	90	30	0.0666667
ACCCCT|GACAAC	ACCCCT	GACAAC	2	88	30	0.0666667
ACCGCT|GAGCCC	ACCGCT	GAGCCC	2	48	30	0.0666667
ACCTCA|GAGCCC	ACCTCA	GAGCCC	2	56	30	0.0666667
ACCTCG|CGACCT	ACCTCG	CGACCT	3	45	45	0.0666667
ACCTGC|TCACCG	ACCTGC	TCACCG	3	38	45	0.0666667
ACCTCG|ACGCAC	ACGCAC	ACCTCG	3	87	45	0.0666667
ACGCCA|CGACTC	ACGCCA	CGACTC	2	58	30	0.0666667
ACGCGA|GCAACA	ACGCGA	GCAACA	2	36	30	0.0666667
ACAAGG|AGGAAT	AGGAAT	ACAAGG	2	40	30	0.0666667
AACACG|AGGTAA	AGGTAA	AACACG	2	36	30	0.0666667
AACACA|AGGTAC	AGGTAC	AACACA	2	36	30	0.0666667
CAACCC|CTGCCT	CAACCC	CTGCCT	2	95	30	0.0666667
AACACG|CAAGGA	CAAGGA	AACACG	2	40	30	0.0666667
AGCCGC|CACAAC	CACAAC	AGCCGC	2	52	30	0.0666667
CACAAC|GACGGC	CACAAC	GACGGC	2	52	30	0.0666667
AACACG|CACACA	CACACA	AACACG	2	69	30	0.0666667
CACACA|CGACTC	CACACA	CGACTC	2	69	30	0.0666667
CACACC|GCAACA	CACACC	GCAACA	2	132	30	0.0666667
AACACG|CACACC	CACACC	AACACG	2	132	30	0.0666667
CACATC|GCCGCT	CACATC	GCCGCT	2	41	30	0.0666667
CACCAC|CGTCAC	CACCAC	CGTCAC	2	163	30	0.0666667
ACCCTT|CACCCC	CACCCC	ACCCTT	2	242	30	0.0666667
CACCCC|CAGCCA	CACCCC	CAGCCA	2	242	30	0.0666667
CACCAT|CACCCC	CACCCC	CACCAT	2	242	30	0.0666667
CACCCG|GAGCCC	CACCCG	GAGCCC	2	126	30	0.0666667
ACACCA|CACCGC	CACCGC	ACACCA	4	179	60	0.0666667
CACCGG|CACGCC	CACGCC	CACCGG	3	153	45	0.0666667
CAACAA|CACGCG	CACGCG	CAACAA	2	72	30	0.0666667
CACTAC|CCTTTC	CACTAC	CCTTTC	2	45	30	0.0666667
CATCCC|CTGCCT	CATCCC	CTGCCT	2	72	30	0.0666667
AACACG|CCACAC	CCACAC	AACACG	2	136	30	0.0666667
CCACAC|GAGCCC	CCACAC	GAGCCC	2	136	30	0.0666667
ACACCC|CCACCC	CCACCC	ACACCC	6	298	90	0.0666667
ACCCCG|CCACCC	CCACCC	ACCCCG	6	298	90	0.0666667
CACCAT|CCACCC	CCACCC	CACCAT	2	298	30	0.0666667
CCACCC|CGTCCT	CCACCC	CGTCCT	2	298	30	0.0666667
CCACCC|GAGCCC	CCACCC	GAGCCC	2	298	30	0.0666667
CCACGA|CGTCAC	CCACGA	CGTCAC	2	40	30	0.0666667
AACACG|CCACGC	CCACGC	AACACG	2	148	30	0.0666667
CCACGC|CGTCCT	CCACGC	CGTCCT	2	148	30	0.0666667
CCATCC|CTGCCT	CCATCC	CTGCCT	2	81	30	0.0666667
ACCTCG|CCCACC	CCCACC	ACCTCG	3	321	45	0.0666667
CCCACC|GACGGC	CCCACC	GACGGC	2	321	30	0.0666667
CCCACC|CGAGGT	CCCACC	CGAGGT	2	321	30	0.0666667
CCCACC|GACAAC	CCCACC	GACAAC	2	321	30	0.0666667
CCCACC|GTCGCC	CCCACC	GTCGCC	2	321	30	0.0666667
AACACG|CCCACG	CCCACG	AACACG	2	118	30	0.0666667
CCCATC|CTGCCT	CCCATC	CTGCCT	2	78	30	0.0666667
CAGCCA|CCCCAC	CCCCAC	CAGCCA	2	289	30	0.0666667
CCCCAC|GCCGCA	CCCCAC	GCCGCA	4	289	60	0.0666667
AACACG|CCCCAC	CCCCAC	AACACG	2	289	30	0.0666667
CCCCAC|CGACTC	CCCCAC	CGACTC	2	289	30	0.0666667
CCCCAC|GACAAC	CCCCAC	GACAAC	2	289	30	0.0666667
CCCCAC|GTCGCC	CCCCAC	GTCGCC	2	289	30	0.0666667
CCCCCC|GTCGCC	CCCCCC	GTCGCC	2	162	30	0.0666667
CCCCCG|GCCAAC	CCCCCG	GCCAAC	3	145	45	0.0666667
CACCAT|CCCCCG	CCCCCG	CACCAT	2	145	30	0.0666667
CCCCCT|GCCGCT	CCCCCT	GCCGCT	2	123	30	0.0666667
AGCCGC|CCCCGC	CCCCGC	AGCCGC	2	259	30	0.0666667
CCCCGC|GCCAAC	CCCCGC	GCCAAC	3	259	45	0.0666667
CACCAT|CCCCGC	CCCCGC	CACCAT	2	259	30	0.0666667
CCCCGC|GACGGC	CCCCGC	GACGGC	2	259	30	0.0666667
CCCCGC|GTCGCC	CCCCGC	GTCGCC	2	259	30	0.0666667
CCCCTC|CTGCCT	CCCCTC	CTGCCT	2	218	30	0.0666667
CCCCTC|GCAACA	CCCCTC	GCAACA	2	218	30	0.0666667
CACCAT|CCCCTC	CCCCTC	CACCAT	2	218	30	0.0666667
CCCGAC|GCAACC	CCCGAC	GCAACC	3	127	45	0.0666667
CCCGAC|GACGGC	CCCGAC	GACGGC	2	127	30	0.0666667
ACCCCC|CCCGCC	CCCGCC	ACCCCC	10	319	150	0.0666667
CCCGCC|CTCCCG	CCCGCC	CTCCCG	5	319	75	0.0666667
CCCGCC|GCCAAC	CCCGCC	GCCAAC	3	319	45	0.0666667
CCCGCC|CCTTTC	CCCGCC	CCTTTC	2	319	30	0.0666667
CCCGCG|GACGGC	CCCGCG	GACGGC	2	101	30	0.0666667
CCCGTC|GCAACA	CCCGTC	GCAACA	2	107	30	0.0666667
ACAAGG|CCCTAA	CCCTAA	ACAAGG	2	31	30	0.0666667
CCCTCA|CCTTTC	CCCTCA	CCTTTC	2	97	30	0.0666667
CAACAA|CCCTCC	CCCTCC	CAACAA	2	259	30	0.0666667
CACTCG|CCCTCC	CCCTCC	CACTCG	3	259	45	0.0666667
CCCTCC|CTGCCT	CCCTCC	CTGCCT	2	259	30	0.0666667
CCCTCC|GCAACA	CCCTCC	GCAACA	2	259	30	0.0666667
CCCTCC|GCAACC	CCCTCC	GCAACC	3	259	45	0.0666667
CCCTCC|CGTCAC	CCCTCC	CGTCAC	2	259	30	0.0666667
CCCTTC|CTGCCT	CCCTTC	CTGCCT	2	58	30	0.0666667
CCGACC|GACGGC	CCGACC	GACGGC	2	131	30	0.0666667
CCGCAC|CCGCGT	CCGCAC	CCGCGT	3	141	45	0.0666667
CAGCCA|CCGCCC	CCGCCC	CAGCCA	2	336	30	0.0666667
CCGCCC|GACGGC	CCGCCC	GACGGC	2	336	30	0.0666667
CCGCCC|GCCGCT	CCGCCC	GCCGCT	2	336	30	0.0666667
CCGCCC|GACAAC	CCGCCC	GACAAC	2	336	30	0.0666667
ACACCA|CCGGCG	CCGGCG	ACACCA	4	38	60	0.0666667
CCGTCC|CCTTCC	CCGTCC	CCTTCC	4	107	60	0.0666667
CCGTCC|GCAACA	CCGTCC	GCAACA	2	107	30	0.0666667
CCGTCG|GAGCCC	CCGTCG	GAGCCC	2	44	30	0.0666667
AGCCGC|CCGTGC	CCGTGC	AGCCGC	2	32	30	0.0666667
CCTACC|CGACTC	CCTACC	CGACTC	2	82	30	0.0666667
CAACAA|CCTCCA	CCTCCA	CAACAA	2	96	30	0.0666667
CCTCCA|CTGCCT	CCTCCA	CTGCCT	2	96	30	0.0666667
CCTCCC|GCAACA	CCTCCC	GCAACA	2	229	30	0.0666667
CCTCCC|GCAACC	CCTCCC	GCAACC	3	229	45	0.0666667
CCTCCC|TCACCG	CCTCCC	TCACCG	3	229	45	0.0666667
ACCTCG|CCTCGC	CCTCGC	ACCTCG	3	109	45	0.0666667
CCTCGC|CCTTCC	CCTCGC	CCTTCC	4	109	60	0.0666667
CGAACC|CGACCT	CGAACC	CGACCT	3	34	45	0.0666667
ACCTCG|CGACCT	CGACCT	ACCTCG	3	45	45	0.0666667
CGACGC|GCAACA	CGACGC	GCAACA	2	80	30	0.0666667
AGGCAA|CGACGC	CGACGC	AGGCAA	2	80	30	0.0666667
ACCTCG|CGCACA	CGCACA	ACCTCG	3	74	45	0.0666667
CCGCGT|CGCACC	CGCACC	CCGCGT	3	145	45	0.0666667
CGCACG|GTCGCC	CGCACG	GTCGCC	2	59	30	0.0666667
ACCCTT|CGCCAC	CGCCAC	ACCCTT	2	176	30	0.0666667
CGACTC|CGCCAC	CGCCAC	CGACTC	2	176	30	0.0666667
CCTTTC|CGCCAC	CGCCAC	CCTTTC	2	176	30	0.0666667
ACCCTT|CGCCAT	CGCCAT	ACCCTT	2	48	30	0.0666667
ACCTCG|CGCCCA	CGCCCA	ACCTCG	3	140	45	0.0666667
CAGCCA|CGCCCA	CGCCCA	CAGCCA	2	140	30	0.0666667
CAGCCA|CGCCCC	CGCCCC	CAGCCA	2	292	30	0.0666667
CCGCGT|CGCCCC	CGCCCC	CCGCGT	3	292	45	0.0666667
CGCCCC|GCCAAC	CGCCCC	GCCAAC	3	292	45	0.0666667
CCTTTC|CGCCCC	CGCCCC	CCTTTC	2	292	30	0.0666667
CGCCCC|CGTCCT	CGCCCC	CGTCCT	2	292	30	0.0666667
CCTTTC|CGCCCG	CGCCCG	CCTTTC	2	123	30	0.0666667
CAGCCA|CGCCGA	CGCCGA	CAGCCA	2	53	30	0.0666667
CGCCGT|GAGCCC	CGCCGT	GAGCCC	2	38	30	0.0666667
CGCGAG|GCAACA	CGCGAG	GCAACA	2	33	30	0.0666667
ACCTCG|CGCGCC	CGCGCC	ACCTCG	3	135	45	0.0666667
CGCTCC|GCCGCT	CGCTCC	GCCGCT	2	112	30	0.0666667
AACACA|CGGAGG	CGGAGG	AACACA	2	57	30	0.0666667
CAGCCA|CGGCCG	CGGCCG	CAGCCA	2	42	30	0.0666667
ACACCA|CGGCGC	CGGCGC	ACACCA	4	40	60	0.0666667
AGCCGC|CGTGCC	CGTGCC	AGCCGC	2	46	30	0.0666667
CAACAA|CTACGC	CTACGC	CAACAA	2	38	30	0.0666667
CTCCAC|CTGCCT	CTCCAC	CTGCCT	2	97	30	0.0666667
CAGCCA|CTCCCA	CTCCCA	CAGCCA	2	62	30	0.0666667
AACACG|CTCCCC	CTCCCC	AACACG	2	188	30	0.0666667
CTCCCT|GCAACA	CTCCCT	GCAACA	2	79	30	0.0666667
CTCCGC|GAGCCC	CTCCGC	GAGCCC	2	86	30	0.0666667
CAGCCA|CTCGCC	CTCGCC	CAGCCA	2	107	30	0.0666667
CCTTCC|CTCGCC	CTCGCC	CCTTCC	4	107	60	0.0666667
AACACA|GAAGGA	GAAGGA	AACACA	2	110	30	0.0666667
AACACG|GACACA	GACACA	AACACG	2	47	30	0.0666667
GACCCC|GTCGCC	GACCCC	GTCGCC	2	70	30	0.0666667
GACGCG|GCAACA	GACGCG	GCAACA	2	39	30	0.0666667
AGGCAA|GACGCG	GACGCG	AGGCAA	2	39	30	0.0666667
AGGGAC|GACGCG	GACGCG	AGGGAC	2	39	30	0.0666667
CAACAA|GAGGAA	GAGGAA	CAACAA	2	79	30	0.0666667
AACACA|GAGGAC	GAGGAC	AACACA	2	93	30	0.0666667
ACAAGG|GAGGAC	GAGGAC	ACAAGG	2	93	30	0.0666667
AACACA|GAGGCA	GAGGCA	AACACA	2	40	30	0.0666667
AACACA|GAGGTA	GAGGTA	AACACA	2	75	30	0.0666667
ACAAGG|GCACCC	GCACCC	ACAAGG	2	108	30	0.0666667
CGACTC|GCACCG	GCACCG	CGACTC	2	55	30	0.0666667
GCACGC|GTCGCC	GCACGC	GTCGCC	2	66	30	0.0666667
CGACTC|GCCACG	GCCACG	CGACTC	2	71	30	0.0666667
ACCCTT|GCCACT	GCCACT	ACCCTT	2	44	30	0.0666667
CCTTTC|GCCACT	GCCACT	CCTTTC	2	44	30	0.0666667
CCGCGT|GCCCCC	GCCCCC	CCGCGT	3	174	45	0.0666667
CTGCCT|GCCCCC	GCCCCC	CTGCCT	2	174	30	0.0666667
GCCAAC|GCCCCC	GCCCCC	GCCAAC	3	174	45	0.0666667
CGTCAC|GCCCCC	GCCCCC	CGTCAC	2	174	30	0.0666667
CGTCAC|GCCCCG	GCCCCG	CGTCAC	2	117	30	0.0666667
CACCAT|GCCCCT	GCCCCT	CACCAT	2	86	30	0.0666667
GACGGC|GCCCGA	GCCCGA	GACGGC	2	59	30	0.0666667
GACGGC|GCCCGC	GCCCGC	GACGGC	2	108	30	0.0666667
CCTTTC|GCCCGC	GCCCGC	CCTTTC	2	108	30	0.0666667
GACAAC|GCCCGC	GCCCGC	GACAAC	2	108	30	0.0666667
GAGCCC|GCCGTC	GCCGTC	GAGCCC	2	35	30	0.0666667
GAGCCC|GCGCCA	GCGCCA	GAGCCC	2	56	30	0.0666667
CGTCAC|GCGCCC	GCGCCC	CGTCAC	2	90	30	0.0666667
GAGCCC|GCGCCG	GCGCCG	GAGCCC	2	48	30	0.0666667
AACACG|TACCAC	TACCAC	AACACG	2	33	30	0.0666667
CGACCT|TCACAC	TCACAC	CGACCT	3	43	45	0.0666667
AACACG|TCCCCA	TCCCCA	AACACG	2	63	30	0.0666667
AGCCGC|TCCCCG	TCCCCG	AGCCGC	2	70	30	0.0666667
CTCCCG|TCCCTC	TCCCTC	CTCCCG	5	82	75	0.0666667
GCAACA|TCCCTC	TCCCTC	GCAACA	2	82	30	0.0666667
CCTTTC|TCCGCC	TCCGCC	CCTTTC	2	76	30	0.0666667
ACCCTT|TCGCCA	TCGCCA	ACCCTT	2	40	30	0.0666667
CAGCCA|TCGCCC	TCGCCC	CAGCCA	2	91	30	0.0666667
AGGCAA|TCGCCC	TCGCCC	AGGCAA	2	91	30	0.0666667
CGTCCT|TGCCCC	TGCCCC	CGTCCT	2	66	30	0.0666667
CCCAAC|CCCCAC	CCCCAC	CCCAAC	7	289	106	0.0660377
CCAACC|CCGCCC	CCGCCC	CCAACC	7	336	106	0.0660377
CCACCC|TCGCCC	CCACCC	TCGCCC	6	298	91	0.0659341
CACCCA|CCCAGC	CACCCA	CCCAGC	4	116	61	0.0655738
ACCATC|CGTGCC	ACCATC	CGTGCC	3	35	46	0.0652174
ACCGCC|CGCGCA	ACCGCC	CGCGCA	3	137	46	0.0652174
CACCGC|CGCGCA	CACCGC	CGCGCA	3	179	46	0.0652174
CACTCC|CTCTCC	CACTCC	CTCTCC	3	88	46	0.0652174
CATCGC|CGTGCC	CATCGC	CGTGCC	3	38	46	0.0652174
CCACTC|CTCTCC	CCACTC	CTCTCC	3	98	46	0.0652174
CCATCG|CGTGCC	CCATCG	CGTGCC	3	40	46	0.0652174
CCCACC|CGCGCA	CCCACC	CGCGCA	3	321	46	0.0652174
CCCCCA|CCCCGC	CCCCGC	CCCCCA	9	259	138	0.0652174
CCCCCA|CCCGCC	CCCGCC	CCCCCA	9	319	138	0.0652174
CCCGCC|CGTGCC	CCCGCC	CGTGCC	3	319	46	0.0652174
CCCCCA|CCGCCC	CCGCCC	CCCCCA	9	336	138	0.0652174
CCGCCC|CGCGCA	CCGCCC	CGCGCA	3	336	46	0.0652174
CCGCCC|CTCTCC	CCGCCC	CTCTCC	3	336	46	0.0652174
CCGCCT|GACACC	CCGCCT	GACACC	3	91	46	0.0652174
CCTCAC|GACACC	CCTCAC	GACACC	3	139	46	0.0652174
CCCCCA|CGCCCC	CGCCCC	CCCCCA	9	292	138	0.0652174
CGCCCC|CTCTCC	CGCCCC	CTCTCC	3	292	46	0.0652174
CGCCCG|CGCGCA	CGCCCG	CGCGCA	3	123	46	0.0652174
CGCCTC|GACACC	CGCCTC	GACACC	3	96	46	0.0652174
CGTGCC|GCCCAC	GCCCAC	CGTGCC	3	130	46	0.0652174
CGTGCC|GCCGCC	GCCGCC	CGTGCC	3	109	46	0.0652174
GACACC|GCCGCC	GCCGCC	GACACC	3	109	46	0.0652174
GACACC|GCCTCA	GCCTCA	GACACC	3	43	46	0.0652174
CTCTCC|TCCTCC	TCCTCC	CTCTCC	3	51	46	0.0652174
CCCCCT|CCCTCC	CCCTCC	CCCCCT	8	259	123	0.0650407
CCGCCC|CGCGCG	CCGCCC	CGCGCG	5	336	77	0.0649351
CCACCC|CCTCAC	CCACCC	CCTCAC	9	298	139	0.0647482
ACACAC|ACACGG	ACACAC	ACACGG	2	80	31	0.0645161
ACCCCT|CGAGCC	ACCCCT	CGAGCC	2	88	31	0.0645161
ACCCTC|TGCACA	ACCCTC	TGCACA	2	93	31	0.0645161
AGGAGA|GGAACA	AGGAGA	GGAACA	2	121	31	0.0645161
AGGAGG|TGCACA	AGGAGG	TGCACA	2	184	31	0.0645161
AACGCG|AGGAGG	AGGAGG	AACGCG	2	184	31	0.0645161
ACACGG|CACACA	CACACA	ACACGG	2	69	31	0.0645161
CACACT|CCCGAG	CACACT	CCCGAG	2	44	31	0.0645161
CACCAA|CGCTGC	CACCAA	CGCTGC	2	49	31	0.0645161
CACCCC|CCCTCG	CACCCC	CCCTCG	6	242	93	0.0645161
CACCCG|TGCACA	CACCCG	TGCACA	2	126	31	0.0645161
CACTCC|CGAGCC	CACTCC	CGAGCC	2	88	31	0.0645161
CCAACC|CCCTAA	CCAACC	CCCTAA	2	106	31	0.0645161
CCACAC|CCCGAG	CCACAC	CCCGAG	2	136	31	0.0645161
ACCCTC|CCACCC	CCACCC	ACCCTC	6	298	93	0.0645161
CCACCC|CCCTCG	CCACCC	CCCTCG	6	298	93	0.0645161
CCACCC|CTGCGC	CCACCC	CTGCGC	2	298	31	0.0645161
CCACTC|CCCGAG	CCACTC	CCCGAG	2	98	31	0.0645161
CCCACC|CCCTCG	CCCACC	CCCTCG	6	321	93	0.0645161
CCCCAC|CCCTCT	CCCCAC	CCCTCT	4	289	62	0.0645161
CCCCAC|CGAGCC	CCCCAC	CGAGCC	2	289	31	0.0645161
ACACGG|CCCCCG	CCCCCG	ACACGG	2	145	31	0.0645161
ACACGG|CCCCGC	CCCCGC	ACACGG	2	259	31	0.0645161
CCCCGC|CCCTAA	CCCCGC	CCCTAA	2	259	31	0.0645161
ACCAGC|CCCCGT	CCCCGT	ACCAGC	2	69	31	0.0645161
ACCCTC|CCCCTC	CCCCTC	ACCCTC	6	218	93	0.0645161
CCCCTC|CGAGCC	CCCCTC	CGAGCC	2	218	31	0.0645161
CCCCTC|CCTCAA	CCCCTC	CCTCAA	2	218	31	0.0645161
AACGCG|CCCCTG	CCCCTG	AACGCG	2	63	31	0.0645161
AACGCG|CCCGAC	CCCGAC	AACGCG	2	127	31	0.0645161
CCCGCA|CGAGCC	CCCGCA	CGAGCC	2	102	31	0.0645161
CCCGCA|TGCACA	CCCGCA	TGCACA	2	102	31	0.0645161
CCCGCA|CTGCCG	CCCGCA	CTGCCG	2	102	31	0.0645161
CCCGCC|CTCCCA	CCCGCC	CTCCCA	4	319	62	0.0645161
CCCGCC|CTGCCG	CCCGCC	CTGCCG	2	319	31	0.0645161
ACACGG|CCCGCG	CCCGCG	ACACGG	2	101	31	0.0645161
CCCGCG|TGCACA	CCCGCG	TGCACA	2	101	31	0.0645161
CCCGCT|CCCTAA	CCCGCT	CCCTAA	2	72	31	0.0645161
CCCTCA|CTGCCG	CCCTCA	CTGCCG	2	97	31	0.0645161
ACCAGC|CCCTCC	CCCTCC	ACCAGC	2	259	31	0.0645161
CCGACC|CGAGCC	CCGACC	CGAGCC	2	131	31	0.0645161
CCGACC|TGCACA	CCGACC	TGCACA	2	131	31	0.0645161
AACGCG|CCGACC	CCGACC	AACGCG	2	131	31	0.0645161
CCGACG|TACACG	CCGACG	TACACG	2	53	31	0.0645161
CCGCAC|TGCACA	CCGCAC	TGCACA	2	141	31	0.0645161
CCGCAT|CTGCCG	CCGCAT	CTGCCG	2	33	31	0.0645161
ACCCTC|CCGCCC	CCGCCC	ACCCTC	6	336	93	0.0645161
CCGCCC|CTCCCA	CCGCCC	CTCCCA	4	336	62	0.0645161
CCGCCC|CTGCCG	CCGCCC	CTGCCG	2	336	31	0.0645161
ACCAGC|CCGGCC	CCGGCC	ACCAGC	2	81	31	0.0645161
ACCAGC|CCGTGC	CCGTGC	ACCAGC	2	32	31	0.0645161
CCTCAA|CCTCAC	CCTCAC	CCTCAA	2	139	31	0.0645161
CCTCAC|CTGCCG	CCTCAC	CTGCCG	2	139	31	0.0645161
CGACCA|CGAGCC	CGACCA	CGAGCC	2	51	31	0.0645161
CGACCC|TGCACA	CGACCC	TGCACA	2	109	31	0.0645161
CGACGC|TACACG	CGACGC	TACACG	2	80	31	0.0645161
CGAGCC|CGCACC	CGCACC	CGAGCC	2	145	31	0.0645161
CGCACC|TGCACA	CGCACC	TGCACA	2	145	31	0.0645161
CGCCAA|CTGCGC	CGCCAA	CTGCGC	2	47	31	0.0645161
ACACGG|CGCCCA	CGCCCA	ACACGG	2	140	31	0.0645161
ACACGG|CGCCCC	CGCCCC	ACACGG	2	292	31	0.0645161
CCCTAA|CGCCGA	CGCCGA	CCCTAA	2	53	31	0.0645161
CGCTCC|CGCTGC	CGCTCC	CGCTGC	2	112	31	0.0645161
CGGCGC|TGCACA	CGGCGC	TGCACA	2	40	31	0.0645161
CGCTGC|CGGCGC	CGGCGC	CGCTGC	2	40	31	0.0645161
ACCAGC|CGTGCC	CGTGCC	ACCAGC	2	46	31	0.0645161
GAACGC|GGAACA	GAACGC	GGAACA	2	35	31	0.0645161
CGAGCC|GACCCC	GACCCC	CGAGCC	2	70	31	0.0645161
GACCCT|TGCACA	GACCCT	TGCACA	2	40	31	0.0645161
GAGGAA|TACACG	GAGGAA	TACACG	2	79	31	0.0645161
GAGGAC|TGCACA	GAGGAC	TGCACA	2	93	31	0.0645161
GAGGAG|GGAACA	GAGGAG	GGAACA	2	65	31	0.0645161
AACGCG|GAGGAG	GAGGAG	AACGCG	2	65	31	0.0645161
GCACCC|TGCACA	GCACCC	TGCACA	2	108	31	0.0645161
CCCGAG|GCCACA	GCCACA	CCCGAG	2	59	31	0.0645161
ACACGG|GCCCCC	GCCCCC	ACACGG	2	174	31	0.0645161
ACCAGC|GCCCCC	GCCCCC	ACCAGC	2	174	31	0.0645161
CTGCGC|GCCCGA	GCCCGA	CTGCGC	2	59	31	0.0645161
CTGCCG|GCCCGA	GCCCGA	CTGCCG	2	59	31	0.0645161
CTGCCG|GCCGGC	GCCGGC	CTGCCG	2	37	31	0.0645161
GCCTCA|TACACG	GCCTCA	TACACG	2	43	31	0.0645161
CGAGCC|GCGCCA	GCGCCA	CGAGCC	2	56	31	0.0645161
GCGCCG|TGCACA	GCGCCG	TGCACA	2	48	31	0.0645161
GGAACA|GGAGAA	GGAGAA	GGAACA	2	44	31	0.0645161
GGAGGA|TGCACA	GGAGGA	TGCACA	2	119	31	0.0645161
ACCAGC|GGCCCC	GGCCCC	ACCAGC	2	58	31	0.0645161
CCCGAG|GGCCCG	GGCCCG	CCCGAG	2	51	31	0.0645161
AGGACC|GGGAGG	GGGAGG	AGGACC	2	57	31	0.0645161
CCTCAA|TCACCC	TCACCC	CCTCAA	2	80	31	0.0645161
CTGCGC|TCCCGC	TCCCGC	CTGCGC	2	81	31	0.0645161
AACGCG|TGAGGA	TGAGGA	AACGCG	2	50	31	0.0645161
CCCTAA|TGCCGC	TGCCGC	CCCTAA	2	38	31	0.0645161
ACAAGG|CCCTAA	ACAAGG	CCCTAA	2	30	31	0.0645161
CCCCAC|GCCGCC	CCCCAC	GCCGCC	7	289	109	0.0642202
CCGCCC|CGACCC	CCGCCC	CGACCC	7	336	109	0.0642202
CACCCC|GCTCCC	CACCCC	GCTCCC	5	242	78	0.0641026
CGCACC|GCTCCC	CGCACC	GCTCCC	5	145	78	0.0641026
CGCCAC|CTGCCC	CGCCAC	CTGCCC	5	176	78	0.0641026
ACTCGC|CACCCT	CACCCT	ACTCGC	3	96	47	0.0638298
CCCACA|GACACA	CCCACA	GACACA	3	105	47	0.0638298
ACTCGC|CCCCGC	CCCCGC	ACTCGC	3	259	47	0.0638298
CCCCTC|CGCCAA	CCCCTC	CGCCAA	3	218	47	0.0638298
ACTCGC|CCCGCA	CCCGCA	ACTCGC	3	102	47	0.0638298
ACTCGC|CCGCCC	CCGCCC	ACTCGC	3	336	47	0.0638298
CGACGC|TCGACC	CGACGC	TCGACC	3	80	47	0.0638298
GCCCCC|TCACGC	GCCCCC	TCACGC	3	174	47	0.0638298
GCGCAC|TCGACC	GCGCAC	TCGACC	3	55	47	0.0638298
ACGCCC|CTCCCC	CTCCCC	ACGCCC	7	188	110	0.0636364
CCACGC|TCCCCA	CCACGC	TCCCCA	4	148	63	0.0634921
CCCTCC|TCCCCT	CCCTCC	TCCCCT	4	259	63	0.0634921
CCCTGC|TCCCCA	CCCTGC	TCCCCA	4	84	63	0.0634921
CGCCCC|TCCCCA	CGCCCC	TCCCCA	4	292	63	0.0634921
CCTCCT|GCCCCC	GCCCCC	CCTCCT	4	174	63	0.0634921
GCCCTA|TCCCCT	GCCCTA	TCCCCT	4	32	63	0.0634921
CCCGCC|CTCCCT	CCCGCC	CTCCCT	5	319	79	0.0632911
CCGCCA|CTCCCT	CCGCCA	CTCCCT	5	131	79	0.0632911
CAACCC|CCCACC	CCCACC	CAACCC	6	321	95	0.0631579
CCCGCC|CCTGCC	CCCGCC	CCTGCC	6	319	95	0.0631579
CCCACC|CGCCCT	CCCACC	CGCCCT	7	321	111	0.0630631
AAGGAG|ACGACA	AAGGAG	ACGACA	2	209	32	0.0625
AAGGAG|GGCCCA	AAGGAG	GGCCCA	2	209	32	0.0625
ACAACC|GGCCCA	ACAACC	GGCCCA	2	37	32	0.0625
ACACGC|CAACCT	ACACGC	CAACCT	2	70	32	0.0625
ACCACC|CCTGCA	ACCACC	CCTGCA	2	132	32	0.0625
ACCACG|CCGTCA	ACCACG	CCGTCA	2	67	32	0.0625
ACCAGC|CCGTGC	ACCAGC	CCGTGC	2	31	32	0.0625
ACCCCC|ATCACC	ACCCCC	ATCACC	2	150	32	0.0625
ACCCTC|CCTGCA	ACCCTC	CCTGCA	2	93	32	0.0625
ACCGAC|CCTGCA	ACCGAC	CCTGCA	2	54	32	0.0625
ACCGCC|CCGTGC	ACCGCC	CCGTGC	2	137	32	0.0625
ACCTGC|CCGTCA	ACCTGC	CCGTCA	2	38	32	0.0625
ACGCCA|CTACCG	ACGCCA	CTACCG	2	58	32	0.0625
ACGCCC|GGCCCA	ACGCCC	GGCCCA	2	110	32	0.0625
ACCGTC|ACGGCC	ACGGCC	ACCGTC	2	37	32	0.0625
ACTCAC|CTACCG	ACTCAC	CTACCG	2	40	32	0.0625
AGCCAC|GCCGAC	AGCCAC	GCCGAC	3	44	48	0.0625
AGCCGC|CCGTGC	AGCCGC	CCGTGC	2	30	32	0.0625
ACGACA|AGGAGA	AGGAGA	ACGACA	2	121	32	0.0625
AGGAGG|GGCCCA	AGGAGG	GGCCCA	2	184	32	0.0625
CAACAC|TAGGAG	CAACAC	TAGGAG	2	65	32	0.0625
ATCACC|CAACCC	CAACCC	ATCACC	2	95	32	0.0625
CACACG|CGCCAT	CACACG	CGCCAT	3	64	48	0.0625
CACCAC|CCTGCA	CACCAC	CCTGCA	2	163	32	0.0625
ATCACC|CACCCC	CACCCC	ATCACC	2	242	32	0.0625
CACCCG|CCAACA	CACCCG	CCAACA	3	126	48	0.0625
CACCCT|GCACCA	CACCCT	GCACCA	3	96	48	0.0625
CACCGA|CCTGCA	CACCGA	CCTGCA	2	52	32	0.0625
ATCACC|CACCGC	CACCGC	ATCACC	2	179	32	0.0625
CACCGC|CCGTGC	CACCGC	CCGTGC	2	179	32	0.0625
CACCTC|GCCCTA	CACCTC	GCCCTA	2	116	32	0.0625
ACTGCC|CACGTC	CACGTC	ACTGCC	2	42	32	0.0625
ACTGCC|CAGCCC	CAGCCC	ACTGCC	2	83	32	0.0625
CCACAC|CGCCAT	CCACAC	CGCCAT	3	136	48	0.0625
CCAACA|CCACCC	CCACCC	CCAACA	3	298	48	0.0625
CCACCC|GCGCCG	CCACCC	GCGCCG	3	298	48	0.0625
CCACCC|TTCCCC	CCACCC	TTCCCC	2	298	32	0.0625
ACTGCC|CCACCG	CCACCG	ACTGCC	2	150	32	0.0625
CCACCG|TTCCCC	CCACCG	TTCCCC	2	150	32	0.0625
CCACCT|GCCCTA	CCACCT	GCCCTA	2	109	32	0.0625
CCACCT|TTCCCC	CCACCT	TTCCCC	2	109	32	0.0625
CCACGA|CCGTCA	CCACGA	CCGTCA	2	40	32	0.0625
CCACGC|GCACCA	CCACGC	GCACCA	3	148	48	0.0625
CCACTC|GCCGAC	CCACTC	GCCGAC	3	98	48	0.0625
CCCACA|CGCCAT	CCCACA	CGCCAT	3	105	48	0.0625
CCCACA|CTACCG	CCCACA	CTACCG	2	105	32	0.0625
CACTCA|CCCACC	CCCACC	CACTCA	2	321	32	0.0625
CCCACC|CGCCTC	CCCACC	CGCCTC	6	321	96	0.0625
CCCACC|GCCCTA	CCCACC	GCCCTA	2	321	32	0.0625
CCCACC|GGCCCA	CCCACC	GGCCCA	2	321	32	0.0625
CCCAGC|TCACCC	CCCAGC	TCACCC	5	61	80	0.0625
ACACCT|CCCCAC	CCCCAC	ACACCT	3	289	48	0.0625
CCAACA|CCCCAC	CCCCAC	CCAACA	3	289	48	0.0625
CCCCAC|GCCCTA	CCCCAC	GCCCTA	2	289	32	0.0625
CCCCAC|TTCCCC	CCCCAC	TTCCCC	2	289	32	0.0625
CCCCAG|GCCCTA	CCCCAG	GCCCTA	2	42	32	0.0625
CCCCCA|GCCCTA	CCCCCA	GCCCTA	2	138	32	0.0625
ACTGCC|CCCCCC	CCCCCC	ACTGCC	2	162	32	0.0625
ACCGTC|CCCCGC	CCCCGC	ACCGTC	2	259	32	0.0625
ACGACA|CCCCGC	CCCCGC	ACGACA	2	259	32	0.0625
ACTGCC|CCCCTC	CCCCTC	ACTGCC	2	218	32	0.0625
CACCCT|CCCCTC	CCCCTC	CACCCT	6	218	96	0.0625
CCCCTC|CCGTGC	CCCCTC	CCGTGC	2	218	32	0.0625
CCCCTC|GCGCCG	CCCCTC	GCGCCG	3	218	48	0.0625
CCCGAC|GCCCTA	CCCGAC	GCCCTA	2	127	32	0.0625
CCCGAC|CTACCG	CCCGAC	CTACCG	2	127	32	0.0625
ACCGCT|CCCGCA	CCCGCA	ACCGCT	3	102	48	0.0625
ACTGCC|CCCGCA	CCCGCA	ACTGCC	2	102	32	0.0625
ACCGCT|CCCGCC	CCCGCC	ACCGCT	3	319	48	0.0625
CACTCA|CCCGCC	CCCGCC	CACTCA	2	319	32	0.0625
CCAACA|CCCGCC	CCCGCC	CCAACA	3	319	48	0.0625
ACACCT|CCCGTC	CCCGTC	ACACCT	3	107	48	0.0625
ACCGTC|CCCTAC	CCCTAC	ACCGTC	2	82	32	0.0625
CCCTAC|GGCCCA	CCCTAC	GGCCCA	2	82	32	0.0625
CCCTCA|TCACCC	CCCTCA	TCACCC	5	97	80	0.0625
ACCGTC|CCCTCC	CCCTCC	ACCGTC	2	259	32	0.0625
CCGACA|GCCCTA	CCGACA	GCCCTA	2	52	32	0.0625
CCGACC|CCTGCA	CCGACC	CCTGCA	2	131	32	0.0625
ACCGCT|CCGCAC	CCGCAC	ACCGCT	3	141	48	0.0625
CCAACA|CCGCCA	CCGCCA	CCAACA	3	131	48	0.0625
ACTGCC|CCGCCC	CCGCCC	ACTGCC	2	336	32	0.0625
CAACCT|CCGCCC	CCGCCC	CAACCT	2	336	32	0.0625
CCGCCC|CCGTGC	CCGCCC	CCGTGC	2	336	32	0.0625
CCGCGC|CCTGCA	CCGCGC	CCTGCA	2	129	32	0.0625
ACACCT|CCGCGG	CCGCGG	ACACCT	3	36	48	0.0625
CCTCAC|GCGCCG	CCTCAC	GCGCCG	3	139	48	0.0625
ACCGTC|CCTCCC	CCTCCC	ACCGTC	2	229	32	0.0625
CACTCA|CCTCCC	CCTCCC	CACTCA	2	229	32	0.0625
CCTCCC|CGCCAT	CCTCCC	CGCCAT	3	229	48	0.0625
CCTCCC|TTCCCC	CCTCCC	TTCCCC	2	229	32	0.0625
CCGTGC|CCTCTC	CCTCTC	CCGTGC	2	68	32	0.0625
CGACAC|GCCCTA	CGACAC	GCCCTA	2	65	32	0.0625
CCGTGC|CGACCA	CGACCA	CCGTGC	2	51	32	0.0625
ACCGCT|CGACCC	CGACCC	ACCGCT	3	109	48	0.0625
CCTGCA|CGACCC	CGACCC	CCTGCA	2	109	32	0.0625
ACGACA|CGACCG	CGACCG	ACGACA	2	71	32	0.0625
CCTGCA|CGCACC	CGCACC	CCTGCA	2	145	32	0.0625
CCAACA|CGCCAC	CGCCAC	CCAACA	3	176	48	0.0625
CCGTCA|CGCCAC	CGCCAC	CCGTCA	2	176	32	0.0625
CGCCCA|GCCGAC	CGCCCA	GCCGAC	3	140	48	0.0625
ACGACA|CGCCCC	CGCCCC	ACGACA	2	292	32	0.0625
ACTGCC|CGCCCC	CGCCCC	ACTGCC	2	292	32	0.0625
CGCCCT|GGCCCA	CGCCCT	GGCCCA	2	111	32	0.0625
CCGTCA|CGCCGC	CGCCGC	CCGTCA	2	134	32	0.0625
CGCCTC|TTCCCC	CGCCTC	TTCCCC	2	96	32	0.0625
ACACCT|CGCGCC	CGCGCC	ACACCT	3	135	48	0.0625
CCGTCA|CGCGCC	CGCGCC	CCGTCA	2	135	32	0.0625
ACCGTC|CGGCCA	CGGCCA	ACCGTC	2	36	32	0.0625
CGGCCC|TCACCC	CGGCCC	TCACCC	5	68	80	0.0625
CTACCG|CTCACA	CTCACA	CTACCG	2	41	32	0.0625
CCTGCA|CTCCCC	CTCCCC	CCTGCA	2	188	32	0.0625
CCTGCA|CTCCCG	CTCCCG	CCTGCA	2	75	32	0.0625
CCGTCA|CTCCGC	CTCCGC	CCGTCA	2	86	32	0.0625
GAAGGA|GGCCCA	GAAGGA	GGCCCA	2	110	32	0.0625
CCTGCA|GACCCT	GACCCT	CCTGCA	2	40	32	0.0625
ACGACA|GACCGC	GACCGC	ACGACA	2	50	32	0.0625
CAACCT|GAGGAC	GAGGAC	CAACCT	2	93	32	0.0625
GAGGAT|GGCCCA	GAGGAT	GGCCCA	2	65	32	0.0625
CCTGCA|GCACCA	GCACCA	CCTGCA	2	48	32	0.0625
CCGTCA|GCCACG	GCCACG	CCGTCA	2	71	32	0.0625
ACTGCC|GCCCAC	GCCCAC	ACTGCC	2	130	32	0.0625
GCCCAG|GCCCTA	GCCCAG	GCCCTA	2	41	32	0.0625
ACGACA|GCCCCC	GCCCCC	ACGACA	2	174	32	0.0625
ACTGCC|GCCCCC	GCCCCC	ACTGCC	2	174	32	0.0625
ACCGTC|GCCCCG	GCCCCG	ACCGTC	2	117	32	0.0625
CAACCT|GCCCCG	GCCCCG	CAACCT	2	117	32	0.0625
ACTGCC|GCCCCT	GCCCCT	ACTGCC	2	86	32	0.0625
ACCGCT|GCCCGC	GCCCGC	ACCGCT	3	108	48	0.0625
CCGTCA|GCCCGC	GCCCGC	CCGTCA	2	108	32	0.0625
GCCCTA|GGCCCA	GCCCTA	GGCCCA	2	32	32	0.0625
GCCCTC|TTCCCC	GCCCTC	TTCCCC	2	102	32	0.0625
GCCCTA|GCCGCA	GCCGCA	GCCCTA	2	60	32	0.0625
CCGTGC|GCCGCC	GCCGCC	CCGTGC	2	109	32	0.0625
ACTGCC|GCCGGC	GCCGGC	ACTGCC	2	37	32	0.0625
GCGCCC|TTCCCC	GCGCCC	TTCCCC	2	90	32	0.0625
CCGTCA|GCGCCG	GCGCCG	CCGTCA	2	48	32	0.0625
CAACCT|GCGCCT	GCGCCT	CAACCT	2	33	32	0.0625
ACGACA|GGAGAC	GGAGAC	ACGACA	2	44	32	0.0625
GGAGGA|GGCCCA	GGAGGA	GGCCCA	2	119	32	0.0625
ACGACA|GGAGGC	GGAGGC	ACGACA	2	85	32	0.0625
CCAACA|GGAGGT	GGAGGT	CCAACA	3	98	48	0.0625
ACCGTC|GGCCAC	GGCCAC	ACCGTC	2	53	32	0.0625
GCCCTA|GGCCCA	GGCCCA	GCCCTA	2	32	32	0.0625
ACACCT|TCCCCC	TCCCCC	ACACCT	3	102	48	0.0625
CCTGCA|TCCCCC	TCCCCC	CCTGCA	2	102	32	0.0625
CCTGCA|TCCCTC	TCCCTC	CCTGCA	2	82	32	0.0625
ACACCT|TCCGCA	TCCGCA	ACACCT	3	40	48	0.0625
ACCGTC|TCCGCA	TCCGCA	ACCGTC	2	40	32	0.0625
TCGCCA|TTCCCC	TCGCCA	TTCCCC	2	40	32	0.0625
ACCGCT|TCGCCC	TCGCCC	ACCGCT	3	91	48	0.0625
ACCGTC|ACGTCC	ACGTCC	ACCGTC	2	34	32	0.0625
CAACTC|CCGTGC	CAACTC	CCGTGC	2	29	32	0.0625
CCCACC|CCCCCG	CCCACC	CCCCCG	9	321	145	0.062069
CCCACC|CCGCGC	CCCACC	CCGCGC	8	321	129	0.0620155
CCACCC|CCCTCA	CCACCC	CCCTCA	6	298	97	0.0618557
CCATCC|CCCACC	CCCACC	CCATCC	5	321	81	0.0617284
CCATCC|CCTCCC	CCTCCC	CCATCC	5	229	81	0.0617284
CCATCC|CGCCCC	CGCCCC	CCATCC	5	292	81	0.0617284
CGCCCC|TCCCGC	CGCCCC	TCCCGC	5	292	81	0.0617284
GCCCGC|TCCCGC	GCCCGC	TCCCGC	5	108	81	0.0617284
ACCCAC|AGCCCC	ACCCAC	AGCCCC	4	135	65	0.0615385
AGGAGG|CAACAC	AGGAGG	CAACAC	4	184	65	0.0615385
AGCCCC|CACCCA	CACCCA	AGCCCC	4	116	65	0.0615385
AGCCCC|CACCCG	CACCCG	AGCCCC	4	126	65	0.0615385
CAACAC|CCACCC	CCACCC	CAACAC	4	298	65	0.0615385
AGCCCC|CCCACC	CCCACC	AGCCCC	4	321	65	0.0615385
CCCCTC|CGACAC	CCCCTC	CGACAC	4	218	65	0.0615385
AGCCCC|CTCCCC	CTCCCC	AGCCCC	4	188	65	0.0615385
CAACAC|GGAGGG	GGAGGG	CAACAC	4	68	65	0.0615385
ATCCCC|CACCCC	CACCCC	ATCCCC	3	242	49	0.0612245
CACCGC|GCGACC	CACCGC	GCGACC	3	179	49	0.0612245
ACGGAG|CCACAC	CCACAC	ACGGAG	3	136	49	0.0612245
ATCCCC|CCACTC	CCACTC	ATCCCC	3	98	49	0.0612245
CCCAAC|GCGACC	CCCAAC	GCGACC	3	106	49	0.0612245
ACGGAG|CCCACA	CCCACA	ACGGAG	3	105	49	0.0612245
ATCCCC|CCCACC	CCCACC	ATCCCC	3	321	49	0.0612245
CACCAA|CCCACC	CCCACC	CACCAA	3	321	49	0.0612245
CCCACC|CGCGCT	CCCACC	CGCGCT	3	321	49	0.0612245
CCCATC|CGCGCT	CCCATC	CGCGCT	3	78	49	0.0612245
ATCCCC|CCCCAC	CCCCAC	ATCCCC	3	289	49	0.0612245
CACCAA|CCCCAC	CCCCAC	CACCAA	3	289	49	0.0612245
CACCAA|CCCCCA	CCCCCA	CACCAA	3	138	49	0.0612245
ATCCCC|CCCCCC	CCCCCC	ATCCCC	3	162	49	0.0612245
CACCAA|CCCCCG	CCCCCG	CACCAA	3	145	49	0.0612245
CACCAA|CCCCGC	CCCCGC	CACCAA	3	259	49	0.0612245
CACCAA|CCCGCC	CCCGCC	CACCAA	3	319	49	0.0612245
CCACTC|CCCGCC	CCCGCC	CCACTC	6	319	98	0.0612245
ATCCCC|CCGCCC	CCGCCC	ATCCCC	3	336	49	0.0612245
CCACTC|CCTCCC	CCTCCC	CCACTC	6	229	98	0.0612245
ATCCCC|CGCCCC	CGCCCC	ATCCCC	3	292	49	0.0612245
CGCCCC|CGCGCT	CGCCCC	CGCGCT	3	292	49	0.0612245
GCCCGC|GCGACC	GCCCGC	GCGACC	3	108	49	0.0612245
CCCCCG|CCCTAC	CCCCCG	CCCTAC	5	145	82	0.0609756
CCCCGC|CCTACC	CCCCGC	CCTACC	5	259	82	0.0609756
CCCTCC|TCCCTC	CCCTCC	TCCCTC	5	259	82	0.0609756
CCGTCC|TCCCTC	CCGTCC	TCCCTC	5	107	82	0.0609756
CTCCCG|TCCCTC	CTCCCG	TCCCTC	5	75	82	0.0609756
AACCCG|GCGCCT	AACCCG	GCGCCT	2	38	33	0.0606061
AAGGAG|GACGCA	AAGGAG	GACGCA	2	209	33	0.0606061
ACACAC|CACGGA	ACACAC	CACGGA	2	80	33	0.0606061
ACACTC|ACCACC	ACCACC	ACACTC	2	132	33	0.0606061
ACCACC|GCCCGG	ACCACC	GCCCGG	2	132	33	0.0606061
ACCACC|GCCCTG	ACCACC	GCCCTG	2	132	33	0.0606061
ACCACC|TACCAC	ACCACC	TACCAC	2	132	33	0.0606061
ACCACC|TCTCAC	ACCACC	TCTCAC	2	132	33	0.0606061
ACCACG|ACCCGT	ACCACG	ACCCGT	2	67	33	0.0606061
ACCACG|CGGCCT	ACCACG	CGGCCT	2	67	33	0.0606061
AACGCA|ACCCAC	ACCCAC	AACGCA	2	135	33	0.0606061
ACCCAC|CCGCAT	ACCCAC	CCGCAT	2	135	33	0.0606061
ACCCAC|CGCGAG	ACCCAC	CGCGAG	2	135	33	0.0606061
ACCCAC|GCCCTG	ACCCAC	GCCCTG	2	135	33	0.0606061
ACCCCA|CCGCAT	ACCCCA	CCGCAT	2	98	33	0.0606061
ACCCCA|CGGCCT	ACCCCA	CGGCCT	2	98	33	0.0606061
ACCCCC|GCCCGG	ACCCCC	GCCCGG	2	150	33	0.0606061
ACCCCG|GCCCGG	ACCCCG	GCCCGG	2	90	33	0.0606061
ACCCGA|GCGCCT	ACCCGA	GCGCCT	2	51	33	0.0606061
ACCCGC|CCGCAT	ACCCGC	CCGCAT	2	118	33	0.0606061
ACCCGC|TACCAC	ACCCGC	TACCAC	2	118	33	0.0606061
ACCCTC|TGCCAC	ACCCTC	TGCCAC	2	93	33	0.0606061
ACCGAC|CGCCTA	ACCGAC	CGCCTA	2	54	33	0.0606061
ACCGAC|GCGCCT	ACCGAC	GCGCCT	2	54	33	0.0606061
ACCTGC|TGCCAC	ACCTGC	TGCCAC	2	38	33	0.0606061
ACACTC|ACGCCT	ACGCCT	ACACTC	2	40	33	0.0606061
AGCCAC|GCCCTG	AGCCAC	GCCCTG	2	44	33	0.0606061
AGCCCA|CGCCTA	AGCCCA	CGCCTA	2	35	33	0.0606061
AGCCCA|GCGCCT	AGCCCA	GCGCCT	2	35	33	0.0606061
AGGAAC|GCAGCC	AGGAAC	GCAGCC	2	46	33	0.0606061
AGGAAC|GCCCTG	AGGAAC	GCCCTG	2	46	33	0.0606061
AGGAGA|CACGAC	AGGAGA	CACGAC	4	121	66	0.0606061
CAACCC|GCGCCT	CAACCC	GCGCCT	2	95	33	0.0606061
CAACCT|GCGCCT	CAACCT	GCGCCT	2	32	33	0.0606061
CACACC|CCACAT	CACACC	CCACAT	2	132	33	0.0606061
CAAACC|CACACG	CACACG	CAAACC	2	64	33	0.0606061
CACATC|CACGGA	CACATC	CACGGA	2	41	33	0.0606061
ACACTC|CACCAC	CACCAC	ACACTC	2	163	33	0.0606061
ACCCGT|CACCAC	CACCAC	ACCCGT	2	163	33	0.0606061
CACCAC|TCTCAC	CACCAC	TCTCAC	2	163	33	0.0606061
CACCCA|GCCCTG	CACCCA	GCCCTG	2	116	33	0.0606061
CACACC|CACCCC	CACCCC	CACACC	8	242	132	0.0606061
CACCCC|CCGCAT	CACCCC	CCGCAT	2	242	33	0.0606061
CACCCC|GCTCCG	CACCCC	GCTCCG	2	242	33	0.0606061
CACCCG|TACCAC	CACCCG	TACCAC	2	126	33	0.0606061
CACCCT|TCTCAC	CACCCT	TCTCAC	2	96	33	0.0606061
CACCGA|CGCCTA	CACCGA	CGCCTA	2	52	33	0.0606061
CACCGA|GCGCCT	CACCGA	GCGCCT	2	52	33	0.0606061
CAAACC|CACCGC	CACCGC	CAAACC	2	179	33	0.0606061
CACCGG|CGGCCT	CACCGG	CGGCCT	2	45	33	0.0606061
CACCGG|TACCAC	CACCGG	TACCAC	2	45	33	0.0606061
CACCTC|GCGCCT	CACCTC	GCGCCT	2	116	33	0.0606061
CACCTG|TGCCAC	CACCTG	TGCCAC	2	40	33	0.0606061
CACGCC|GCCCGG	CACGCC	GCCCGG	2	153	33	0.0606061
CACGGC|CCGCAT	CACGGC	CCGCAT	2	44	33	0.0606061
CACTCC|CGCCTA	CACTCC	CGCCTA	2	88	33	0.0606061
CACTCC|TCTCAC	CACTCC	TCTCAC	2	88	33	0.0606061
CACTCC|TGCCAC	CACTCC	TGCCAC	2	88	33	0.0606061
CACTCG|GACGCA	CACTCG	GACGCA	2	45	33	0.0606061
CACTGC|CCGCAT	CACTGC	CCGCAT	2	38	33	0.0606061
CAAACC|CCACAC	CCACAC	CAAACC	2	136	33	0.0606061
CCACAC|CGCCTA	CCACAC	CGCCTA	2	136	33	0.0606061
CCACAG|CCGCAT	CCACAG	CCGCAT	2	42	33	0.0606061
CCACAT|CGGCCT	CCACAT	CGGCCT	2	33	33	0.0606061
CCACCA|CCGCAT	CCACCA	CCGCAT	2	132	33	0.0606061
CCAAAC|CCACCC	CCACCC	CCAAAC	2	298	33	0.0606061
CCACAT|CCACCC	CCACCC	CCACAT	2	298	33	0.0606061
CCACCC|CGGCCT	CCACCC	CGGCCT	2	298	33	0.0606061
CCACCC|TGCCCC	CCACCC	TGCCCC	4	298	66	0.0606061
ACGCCG|CCACCG	CCACCG	ACGCCG	4	150	66	0.0606061
CCACCG|CGCCTA	CCACCG	CGCCTA	2	150	33	0.0606061
CCACCT|GCAGCC	CCACCT	GCAGCC	2	109	33	0.0606061
ACACTC|CCACGC	CCACGC	ACACTC	2	148	33	0.0606061
CCACGC|GCCCGG	CCACGC	GCCCGG	2	148	33	0.0606061
CCACGG|CCGCAT	CCACGG	CCGCAT	2	40	33	0.0606061
CCACTC|CGCCTA	CCACTC	CGCCTA	2	98	33	0.0606061
CCCACA|CCGCAT	CCCACA	CCGCAT	2	105	33	0.0606061
CAAACC|CCCACC	CCCACC	CAAACC	2	321	33	0.0606061
CCCACC|CCGCAT	CCCACC	CCGCAT	2	321	33	0.0606061
CCCACC|GCTCCG	CCCACC	GCTCCG	2	321	33	0.0606061
CCCACC|TGCCAC	CCCACC	TGCCAC	2	321	33	0.0606061
CCCACG|GCCCGG	CCCACG	GCCCGG	2	118	33	0.0606061
CCCCAA|GCGCCT	CCCCAA	GCGCCT	2	58	33	0.0606061
CACGAC|CCCCAC	CCCCAC	CACGAC	4	289	66	0.0606061
CCCCAC|CCGCAT	CCCCAC	CCGCAT	2	289	33	0.0606061
CCCCAC|GCGCCT	CCCCAC	GCGCCT	2	289	33	0.0606061
CCCCAC|TGCCCC	CCCCAC	TGCCCC	4	289	66	0.0606061
CCCCAG|CCGCAT	CCCCAG	CCGCAT	2	42	33	0.0606061
CCCCCA|CCGCAT	CCCCCA	CCGCAT	2	138	33	0.0606061
CCCCCC|TACCAC	CCCCCC	TACCAC	2	162	33	0.0606061
CCCCCG|TACCAC	CCCCCG	TACCAC	2	145	33	0.0606061
CCCCCG|TGCCAC	CCCCCG	TGCCAC	2	145	33	0.0606061
CCCCGC|GCCCTG	CCCCGC	GCCCTG	2	259	33	0.0606061
CCCCGT|TACCAC	CCCCGT	TACCAC	2	69	33	0.0606061
CACGGA|CCCGAC	CCCGAC	CACGGA	2	127	33	0.0606061
CCCGAC|GCGCCT	CCCGAC	GCGCCT	2	127	33	0.0606061
AACGCA|CCCGCC	CCCGCC	AACGCA	2	319	33	0.0606061
CCAAAC|CCCGCC	CCCGCC	CCAAAC	2	319	33	0.0606061
CCCGCC|CCGCAT	CCCGCC	CCGCAT	2	319	33	0.0606061
CCCGCC|TACCAC	CCCGCC	TACCAC	2	319	33	0.0606061
CCCGTC|GACGCA	CCCGTC	GACGCA	2	107	33	0.0606061
CCCGTC|TACCAC	CCCGTC	TACCAC	2	107	33	0.0606061
CCCTAC|TACCAC	CCCTAC	TACCAC	2	82	33	0.0606061
CCCTCA|CGGCCT	CCCTCA	CGGCCT	2	97	33	0.0606061
CACGGA|CCCTGC	CCCTGC	CACGGA	2	84	33	0.0606061
CCGACG|CGCCTA	CCGACG	CGCCTA	2	53	33	0.0606061
CCGAGC|TCTCAC	CCGAGC	TCTCAC	2	37	33	0.0606061
CAAACC|CCGCAA	CCGCAA	CAAACC	2	44	33	0.0606061
CAAACC|CCGCCC	CCGCCC	CAAACC	2	336	33	0.0606061
CACGAC|CCGCCC	CCGCCC	CACGAC	4	336	66	0.0606061
CCGCCC|CGGCCT	CCGCCC	CGGCCT	2	336	33	0.0606061
CCGCAT|CCGCCG	CCGCCG	CCGCAT	2	109	33	0.0606061
CCGCCT|TACCAC	CCGCCT	TACCAC	2	91	33	0.0606061
CCGCGA|CGCCTA	CCGCGA	CGCCTA	2	55	33	0.0606061
ACCCGT|CCGCGC	CCGCGC	ACCCGT	2	129	33	0.0606061
CCGCGC|GCCCTG	CCGCGC	GCCCTG	2	129	33	0.0606061
CCGCGC|TACCAC	CCGCGC	TACCAC	2	129	33	0.0606061
CCGTCC|TACCAC	CCGTCC	TACCAC	2	107	33	0.0606061
CCTCAC|CGGCCT	CCTCAC	CGGCCT	2	139	33	0.0606061
CCTCAC|TACCAC	CCTCAC	TACCAC	2	139	33	0.0606061
AACGCA|CCTCCC	CCTCCC	AACGCA	2	229	33	0.0606061
ACACTC|CCTCCC	CCTCCC	ACACTC	2	229	33	0.0606061
CCAAAC|CCTCCC	CCTCCC	CCAAAC	2	229	33	0.0606061
CCTCCC|GACGCA	CCTCCC	GACGCA	2	229	33	0.0606061
CAAACC|CCTCCG	CCTCCG	CAAACC	2	86	33	0.0606061
CCAAAC|CCTCCG	CCTCCG	CCAAAC	2	86	33	0.0606061
CCACAT|CCTCCT	CCTCCT	CCACAT	2	63	33	0.0606061
CCTCGC|GCAGCC	CCTCGC	GCAGCC	2	109	33	0.0606061
CCTCGC|TGCCAC	CCTCGC	TGCCAC	2	109	33	0.0606061
CCTGCC|TGCCAC	CCTGCC	TGCCAC	2	95	33	0.0606061
CCACAT|CCTTCC	CCTTCC	CCACAT	2	60	33	0.0606061
CCTTCC|CGGCCT	CCTTCC	CGGCCT	2	60	33	0.0606061
CCGCAT|CGACCC	CGACCC	CCGCAT	2	109	33	0.0606061
ACCCGT|CGACGC	CGACGC	ACCCGT	2	80	33	0.0606061
ACCCGT|CGCAAC	CGCAAC	ACCCGT	2	67	33	0.0606061
CGCACA|GCCCTG	CGCACA	GCCCTG	2	74	33	0.0606061
ACACTC|CGCACC	CGCACC	ACACTC	2	145	33	0.0606061
CGCACC|GCGCCT	CGCACC	GCGCCT	2	145	33	0.0606061
ACCCGT|CGCCAC	CGCCAC	ACCCGT	2	176	33	0.0606061
CGCCAC|CGCCTA	CGCCAC	CGCCTA	2	176	33	0.0606061
ACACTC|CGCCCA	CGCCCA	ACACTC	2	140	33	0.0606061
CGCCCC|GCAGCC	CGCCCC	GCAGCC	2	292	33	0.0606061
CGCCCC|GCGCCT	CGCCCC	GCGCCT	2	292	33	0.0606061
CGCCCC|TGCCAC	CGCCCC	TGCCAC	2	292	33	0.0606061
CGCCCG|GCCCTG	CGCCCG	GCCCTG	2	123	33	0.0606061
CGCCCT|GCCCTG	CGCCCT	GCCCTG	2	111	33	0.0606061
CGCCGC|CGGCCT	CGCCGC	CGGCCT	2	134	33	0.0606061
CCGCAT|CGCCGT	CGCCGT	CCGCAT	2	38	33	0.0606061
CGCCTC|TACCAC	CGCCTC	TACCAC	2	96	33	0.0606061
CGCGCC|GCCCTG	CGCGCC	GCCCTG	2	135	33	0.0606061
CCACAT|CGGCCT	CGGCCT	CCACAT	2	33	33	0.0606061
CTCACC|TGCCAC	CTCACC	TGCCAC	2	123	33	0.0606061
CCAAAC|CTCCCC	CTCCCC	CCAAAC	2	188	33	0.0606061
CTCCCC|GCTCCG	CTCCCC	GCTCCG	2	188	33	0.0606061
CTCCCT|TACCAC	CTCCCT	TACCAC	2	79	33	0.0606061
CTCGAC|GACGCA	CTCGAC	GACGCA	2	40	33	0.0606061
CTCGCC|GCAGCC	CTCGCC	GCAGCC	2	107	33	0.0606061
CTCGCC|TGCCAC	CTCGCC	TGCCAC	2	107	33	0.0606061
GAACAC|TACCAC	GAACAC	TACCAC	2	42	33	0.0606061
GACCAC|GCTCCG	GACCAC	GCTCCG	2	61	33	0.0606061
CCGCAT|GACCCC	GACCCC	CCGCAT	2	70	33	0.0606061
CACGGA|GACCCT	GACCCT	CACGGA	2	40	33	0.0606061
GACCCT|TGCCAC	GACCCT	TGCCAC	2	40	33	0.0606061
CGGCCT|GACCTC	GACCTC	CGGCCT	2	43	33	0.0606061
GACCTC|GACGCA	GACCTC	GACGCA	2	43	33	0.0606061
GACCTC|TGCCAC	GACCTC	TGCCAC	2	43	33	0.0606061
GAGGAA|GCAGCC	GAGGAA	GCAGCC	2	79	33	0.0606061
AACGCA|GAGGAC	GAGGAC	AACGCA	2	93	33	0.0606061
AACGCA|GAGGAT	GAGGAT	AACGCA	2	65	33	0.0606061
ACACTC|GAGGGA	GAGGGA	ACACTC	2	53	33	0.0606061
CGCGAG|GCAACA	GCAACA	CGCGAG	2	30	33	0.0606061
GCAACC|GCGCCT	GCAACC	GCGCCT	2	45	33	0.0606061
ACACTC|GCACCA	GCACCA	ACACTC	2	48	33	0.0606061
CCGCAT|GCACCC	GCACCC	CCGCAT	2	108	33	0.0606061
GCCACC|TCTCAC	GCCACC	TCTCAC	2	133	33	0.0606061
CGCCTA|GCCCAC	GCCCAC	CGCCTA	2	130	33	0.0606061
GCCCAC|GCGCCT	GCCCAC	GCGCCT	2	130	33	0.0606061
CGGCCT|GCCCGC	GCCCGC	CGGCCT	2	108	33	0.0606061
CGGCCT|GCCCTC	GCCCTC	CGGCCT	2	102	33	0.0606061
GCCCTC|GCCCTG	GCCCTC	GCCCTG	2	102	33	0.0606061
CCACAT|GCCTCC	GCCTCC	CCACAT	2	72	33	0.0606061
ACACTC|GCCTTC	GCCTTC	ACACTC	2	34	33	0.0606061
ACCCGT|GCGACG	GCGACG	ACCCGT	2	35	33	0.0606061
ACACTC|GCGCCC	GCGCCC	ACACTC	2	90	33	0.0606061
GCGCGC|TACCAC	GCGCGC	TACCAC	2	66	33	0.0606061
CCACAT|GCGCTC	GCGCTC	CCACAT	2	35	33	0.0606061
GCCCTG|GGAGAC	GGAGAC	GCCCTG	2	44	33	0.0606061
AACGCA|GGAGGA	GGAGGA	AACGCA	2	119	33	0.0606061
ACACTC|GGAGGG	GGAGGG	ACACTC	2	68	33	0.0606061
CCGCAT|GGCCCG	GGCCCG	CCGCAT	2	51	33	0.0606061
ACACTC|TCACGC	TCACGC	ACACTC	2	47	33	0.0606061
GCTCCG|TCCACC	TCCACC	GCTCCG	2	93	33	0.0606061
TACCAC|TCCACC	TCCACC	TACCAC	2	93	33	0.0606061
GCTCCG|TCCCCA	TCCCCA	GCTCCG	2	63	33	0.0606061
CAAACC|TCCCCG	TCCCCG	CAAACC	2	70	33	0.0606061
CAAACC|TCCCCT	TCCCCT	CAAACC	2	63	33	0.0606061
CCAAAC|TCCCCT	TCCCCT	CCAAAC	2	63	33	0.0606061
TCGACC|TGCCAC	TCGACC	TGCCAC	2	47	33	0.0606061
GCAGCC|TCGCCC	TCGCCC	GCAGCC	2	91	33	0.0606061
GCAGCC|TGAGGA	TGAGGA	GCAGCC	2	50	33	0.0606061
CCGCAT|TGCCGC	TGCCGC	CCGCAT	2	38	33	0.0606061
AACGCA|TGGAGG	TGGAGG	AACGCA	2	49	33	0.0606061
AACACG|TACCAC	AACACG	TACCAC	2	30	33	0.0606061
CAACTC|CGGCCT	CAACTC	CGGCCT	2	29	33	0.0606061
CCGCAT|CTGCCG	CTGCCG	CCGCAT	2	31	33	0.0606061
GCAGCC|GGAACG	GGAACG	GCAGCC	2	29	33	0.0606061
GCCCTG|GGAACG	GGAACG	GCCCTG	2	29	33	0.0606061
CACCCA|CCAGCC	CCAGCC	CACCCA	7	73	116	0.0603448
CAGCCC|CCCACC	CCCACC	CAGCCC	5	321	83	0.060241
ACCACC|CCAACG	ACCACC	CCAACG	3	132	50	0.06
CACCAC|CCAACG	CACCAC	CCAACG	3	163	50	0.06
CAACCA|CCACAC	CCACAC	CAACCA	3	136	50	0.06
CCAACG|CCACCA	CCACCA	CCAACG	3	132	50	0.06
ACCCCC|CCCACC	CCCACC	ACCCCC	9	321	150	0.06
CCCACC|GACCGC	CCCACC	GACCGC	3	321	50	0.06
CCCCAC|GACCGC	CCCCAC	GACCGC	3	289	50	0.06
CCAACG|CCCGCC	CCCGCC	CCAACG	3	319	50	0.06
ACCCCC|CCGCCC	CCGCCC	ACCCCC	9	336	150	0.06
CCAACG|CCGCCC	CCGCCC	CCAACG	3	336	50	0.06
CCAACG|CGACCC	CGACCC	CCAACG	3	109	50	0.06
CCAACG|CGCCAC	CGCCAC	CCAACG	3	176	50	0.06
ACCCCC|CGCCCG	CGCCCG	ACCCCC	9	123	150	0.06
CAACCA|CGGCAC	CGGCAC	CAACCA	3	51	50	0.06
CAACCA|GCGCCC	GCGCCC	CAACCA	3	90	50	0.06
ACCACG|ACCCCC	ACCCCC	ACCACG	4	150	67	0.0597015
ACCACG|CCCCTC	CCCCTC	ACCACG	4	218	67	0.0597015
CCACCC|CCCCTC	CCACCC	CCCCTC	13	298	218	0.059633
CCCCTC|CCCTCC	CCCTCC	CCCCTC	13	259	218	0.059633
CCCTGC|CTCCCC	CTCCCC	CCCTGC	5	188	84	0.0595238
CACCGC|CCCGCG	CACCGC	CCCGCG	6	179	101	0.0594059
CCCGCG|CCGCCC	CCGCCC	CCCGCG	6	336	101	0.0594059
ACCCGC|ACCGCC	ACCGCC	ACCCGC	7	137	118	0.059322
CCCACC|CCCACG	CCCACC	CCCACG	7	321	118	0.059322
CCCACG|CCCCAC	CCCCAC	CCCACG	7	289	118	0.059322
ACCCGC|CGCCCG	CGCCCG	ACCCGC	7	123	118	0.059322
CCACCG|CGCGCC	CCACCG	CGCGCC	8	150	135	0.0592593
ACCCAC|GCCCGC	GCCCGC	ACCCAC	8	108	135	0.0592593
AACACC|CCAGCG	AACACC	CCAGCG	2	53	34	0.0588235
AACCCC|CGCACT	AACCCC	CGCACT	2	59	34	0.0588235
AAGGAG|CCCTTT	AAGGAG	CCCTTT	2	209	34	0.0588235
AACCCA|ACACCC	ACACCC	AACCCA	2	90	34	0.0588235
ACACCG|CGCACT	ACACCG	CGCACT	2	58	34	0.0588235
ACACCG|CTCACG	ACACCG	CTCACG	3	58	51	0.0588235
ACACGC|CCATCA	ACACGC	CCATCA	2	70	34	0.0588235
ACACTC|GCCTTC	ACACTC	GCCTTC	2	33	34	0.0588235
AACCCA|ACCCAC	ACCCAC	AACCCA	2	135	34	0.0588235
AACCCA|ACCCCC	ACCCCC	AACCCA	2	150	34	0.0588235
ACCCCC|ACCCGA	ACCCCC	ACCCGA	3	150	51	0.0588235
ACCCCG|CGGCAC	ACCCCG	CGGCAC	3	90	51	0.0588235
ACCCGC|GCCTTC	ACCCGC	GCCTTC	2	118	34	0.0588235
ACCGTC|ACGTCC	ACCGTC	ACGTCC	2	32	34	0.0588235
ACCTCC|GGCCCG	ACCTCC	GGCCCG	3	85	51	0.0588235
ACGACC|CGAACC	ACGACC	CGAACC	2	53	34	0.0588235
ACGCCT|GGCCGC	ACGCCT	GGCCGC	2	40	34	0.0588235
ACTCAC|GCCTTC	ACTCAC	GCCTTC	2	40	34	0.0588235
ACTCCC|GCCTTC	ACTCCC	GCCTTC	2	73	34	0.0588235
AGCCCC|TCCTCC	AGCCCC	TCCTCC	3	65	51	0.0588235
AGGAGG|CCCTTT	AGGAGG	CCCTTT	2	184	34	0.0588235
CAACAC|GGAGGG	CAACAC	GGAGGG	4	65	68	0.0588235
CAACCA|CGGCAC	CAACCA	CGGCAC	3	50	51	0.0588235
CACACC|CCATCA	CACACC	CCATCA	2	132	34	0.0588235
CACACG|CCATCA	CACACG	CCATCA	2	64	34	0.0588235
CACCAC|CGGCAC	CACCAC	CGGCAC	3	163	51	0.0588235
CACCAC|TCCTCC	CACCAC	TCCTCC	3	163	51	0.0588235
AACCCA|CACCCA	CACCCA	AACCCA	2	116	34	0.0588235
CACCCA|CCAGCG	CACCCA	CCAGCG	2	116	34	0.0588235
AACCCA|CACCCC	CACCCC	AACCCA	2	242	34	0.0588235
CACCCC|GCCCTC	CACCCC	GCCCTC	6	242	102	0.0588235
CACCCG|CCATCA	CACCCG	CCATCA	2	126	34	0.0588235
CACGCC|CCAGCG	CACGCC	CCAGCG	2	153	34	0.0588235
CACGCC|TCGCTC	CACGCC	TCGCTC	2	153	34	0.0588235
CACGCG|CCATCA	CACGCG	CCATCA	2	72	34	0.0588235
CCAACC|CCCTTT	CCAACC	CCCTTT	2	106	34	0.0588235
CCACCA|TCGCTC	CCACCA	TCGCTC	2	132	34	0.0588235
AACCCA|CCACCC	CCACCC	AACCCA	2	298	34	0.0588235
CCACCC|CCTCTC	CCACCC	CCTCTC	4	298	68	0.0588235
CCACCC|GCCTTC	CCACCC	GCCTTC	2	298	34	0.0588235
CCACCC|GGCCCG	CCACCC	GGCCCG	3	298	51	0.0588235
ACGTCC|CCACCC	CCACCC	ACGTCC	2	298	34	0.0588235
CCACCC|GGCCGC	CCACCC	GGCCGC	2	298	34	0.0588235
CCACGA|GGCCGC	CCACGA	GGCCGC	2	40	34	0.0588235
CCATCC|GGCCGC	CCATCC	GGCCGC	2	81	34	0.0588235
CCAGCG|CCCAAC	CCCAAC	CCAGCG	2	106	34	0.0588235
CCATCA|CCCACA	CCCACA	CCATCA	2	105	34	0.0588235
CCCACC|CGGCCC	CCCACC	CGGCCC	4	321	68	0.0588235
ACGTCC|CCCACC	CCCACC	ACGTCC	2	321	34	0.0588235
CCCATC|GGCCGC	CCCATC	GGCCGC	2	78	34	0.0588235
ACCTCC|CCCCAC	CCCCAC	ACCTCC	5	289	85	0.0588235
CCCCAC|CCCTTT	CCCCAC	CCCTTT	2	289	34	0.0588235
CCCCAC|CTACCC	CCCCAC	CTACCC	4	289	68	0.0588235
CCCCAC|TCCCCC	CCCCAC	TCCCCC	6	289	102	0.0588235
CCCCCA|CGCACT	CCCCCA	CGCACT	2	138	34	0.0588235
CCCCCC|CGCACT	CCCCCC	CGCACT	2	162	34	0.0588235
CCATCA|CCCCGC	CCCCGC	CCATCA	2	259	34	0.0588235
CCCCGC|CGAACC	CCCCGC	CGAACC	2	259	34	0.0588235
CCCCGC|CGGCAC	CCCCGC	CGGCAC	3	259	51	0.0588235
CCATCA|CCCCTC	CCCCTC	CCATCA	2	218	34	0.0588235
CCCGCC|CGAACC	CCCGCC	CGAACC	2	319	34	0.0588235
CCCGCC|GGCCGC	CCCGCC	GGCCGC	2	319	34	0.0588235
CCCGGC|TCGCTC	CCCGGC	TCGCTC	2	69	34	0.0588235
CCCTCA|GGCCCG	CCCTCA	GGCCCG	3	97	51	0.0588235
AACCCA|CCCTCC	CCCTCC	AACCCA	2	259	34	0.0588235
CCCTCT|GGCCGC	CCCTCT	GGCCGC	2	62	34	0.0588235
CCATCA|CCGACC	CCGACC	CCATCA	2	131	34	0.0588235
CCGCAC|CGCACT	CCGCAC	CGCACT	2	141	34	0.0588235
CCGCCA|TCGCTC	CCGCCA	TCGCTC	2	131	34	0.0588235
CCAGCG|CCGCCC	CCGCCC	CCAGCG	2	336	34	0.0588235
CCGCCC|CGGCCC	CCGCCC	CGGCCC	4	336	68	0.0588235
CCGCCC|GGCCGC	CCGCCC	GGCCGC	2	336	34	0.0588235
AACCCA|CCGCCG	CCGCCG	AACCCA	2	109	34	0.0588235
CCGGCC|TCGCTC	CCGGCC	TCGCTC	2	81	34	0.0588235
ACGTCC|CCGTCG	CCGTCG	ACGTCC	2	44	34	0.0588235
CCTACA|CGCACT	CCTACA	CGCACT	2	41	34	0.0588235
CCTCAC|GGCCCG	CCTCAC	GGCCCG	3	139	51	0.0588235
ACCTCC|CCTCCC	CCTCCC	ACCTCC	5	229	85	0.0588235
CCTCTC|GGCCGC	CCTCTC	GGCCGC	2	68	34	0.0588235
CCTGCC|CGCACT	CCTGCC	CGCACT	2	95	34	0.0588235
CCTGCC|TCGCTC	CCTGCC	TCGCTC	2	95	34	0.0588235
CCTTCC|CTCACG	CCTTCC	CTCACG	3	60	51	0.0588235
CCAGCG|CGACAC	CGACAC	CCAGCG	2	65	34	0.0588235
CCATCA|CGACCC	CGACCC	CCATCA	2	109	34	0.0588235
CGACCC|CGGCAC	CGACCC	CGGCAC	3	109	51	0.0588235
CGCACA|CGCACT	CGCACA	CGCACT	2	74	34	0.0588235
CCAGCG|CGCACC	CGCACC	CCAGCG	2	145	34	0.0588235
CGCACC|TCCTCC	CGCACC	TCCTCC	3	145	51	0.0588235
CCCTTT|CGCCAC	CGCCAC	CCCTTT	2	176	34	0.0588235
CGAACC|CGCCAC	CGCCAC	CGAACC	2	176	34	0.0588235
CGCCAC|GCCTTC	CGCCAC	GCCTTC	2	176	34	0.0588235
CGCCAC|TCGCTC	CGCCAC	TCGCTC	2	176	34	0.0588235
CGCCAC|GGCCGC	CGCCAC	GGCCGC	2	176	34	0.0588235
CCCTTT|CGCCAT	CGCCAT	CCCTTT	2	48	34	0.0588235
CGCCCC|CGGCCC	CGCCCC	CGGCCC	4	292	68	0.0588235
CGCCCC|TCGCTC	CGCCCC	TCGCTC	2	292	34	0.0588235
CCCTTT|CGCCCG	CGCCCG	CCCTTT	2	123	34	0.0588235
AAGGAA|CGCCGA	CGCCGA	AAGGAA	2	53	34	0.0588235
ACCCGA|CGCCGA	CGCCGA	ACCCGA	3	53	51	0.0588235
CCATCA|CGCCGC	CGCCGC	CCATCA	2	134	34	0.0588235
CGCCGC|TCGCTC	CGCCGC	TCGCTC	2	134	34	0.0588235
CCCTTT|CGCGCG	CGCGCG	CCCTTT	2	77	34	0.0588235
ACGTCC|CGTCGC	CGTCGC	ACGTCC	2	56	34	0.0588235
CGCACT|CTACAC	CTACAC	CGCACT	2	46	34	0.0588235
CTACCC|GGCCGC	CTACCC	GGCCGC	2	68	34	0.0588235
CTCACC|GCCTTC	CTCACC	GCCTTC	2	123	34	0.0588235
CTCACG|GCCTTC	CTCACG	GCCTTC	2	51	34	0.0588235
ACCTCC|CTCCCC	CTCCCC	ACCTCC	5	188	85	0.0588235
CGCACT|CTCCCC	CTCCCC	CGCACT	2	188	34	0.0588235
CGCACT|CTCTCA	CTCTCA	CGCACT	2	41	34	0.0588235
CTCTCC|TCCTCC	CTCTCC	TCCTCC	3	46	51	0.0588235
CTGCCC|TCGCTC	CTGCCC	TCGCTC	2	78	34	0.0588235
CTCACG|CTTCCC	CTTCCC	CTCACG	3	43	51	0.0588235
ACGTCC|GACACA	GACACA	ACGTCC	2	47	34	0.0588235
CCAGCG|GACACC	GACACC	CCAGCG	2	46	34	0.0588235
CGGCAC|GACCCA	GACCCA	CGGCAC	3	37	51	0.0588235
ACGTCC|GACCCA	GACCCA	ACGTCC	2	37	34	0.0588235
GACCTC|GCCTTC	GACCTC	GCCTTC	2	43	34	0.0588235
GACCTC|GGCCCG	GACCTC	GGCCCG	3	43	51	0.0588235
CCCTTT|GAGGAC	GAGGAC	CCCTTT	2	93	34	0.0588235
CGCACT|GCACAC	GCACAC	CGCACT	2	75	34	0.0588235
CCATCA|GCACCC	GCACCC	CCATCA	2	108	34	0.0588235
CGACCA|GCACGC	GCACGC	CGACCA	3	66	51	0.0588235
GCCACC|TCGCTC	GCCACC	TCGCTC	2	133	34	0.0588235
CCCTTT|GCCACT	GCCACT	CCCTTT	2	44	34	0.0588235
CTCACG|GCCCCC	GCCCCC	CTCACG	3	174	51	0.0588235
ACCTCC|GCCCGC	GCCCGC	ACCTCC	5	108	85	0.0588235
GCCGCC|GGCCGC	GCCGCC	GGCCGC	2	109	34	0.0588235
CCCTTT|GGAGGA	GGAGGA	CCCTTT	2	119	34	0.0588235
CGACCA|TACCCC	TACCCC	CGACCA	3	52	51	0.0588235
GGCCCG|TCACAC	TCACAC	GGCCCG	3	43	51	0.0588235
CCCTTT|TCCCCT	TCCCCT	CCCTTT	2	63	34	0.0588235
GGCCGC|TCCCTC	TCCCTC	GGCCGC	2	82	34	0.0588235
CCCTTT|TCCGCC	TCCGCC	CCCTTT	2	76	34	0.0588235
TCCTCC|TCTCCC	TCTCCC	TCCTCC	3	42	51	0.0588235
ACGTCC|TCTCCC	TCTCCC	ACGTCC	2	42	34	0.0588235
CAACTC|GCCTTC	CAACTC	GCCTTC	2	29	34	0.0588235
CCCCCC|GCCCCT	CCCCCC	GCCCCT	5	162	86	0.0581395
CCCACT|CCCCGC	CCCCGC	CCCACT	5	259	86	0.0581395
CCTCCG|GCCACC	GCCACC	CCTCCG	5	133	86	0.0581395
GCCCCA|GCCCCT	GCCCCA	GCCCCT	5	123	86	0.0581395
CACGCC|CCCGGC	CACGCC	CCCGGC	4	153	69	0.057971
CCCCAC|CCCCCA	CCCCAC	CCCCCA	8	289	138	0.057971
CCCCGC|CCCCGT	CCCCGC	CCCCGT	4	259	69	0.057971
CCCGCC|CCCGGC	CCCGCC	CCCGGC	4	319	69	0.057971
CCCCGT|CGCCCC	CGCCCC	CCCCGT	4	292	69	0.057971
CCCGGC|CGCCCC	CGCCCC	CCCGGC	4	292	69	0.057971
ACCCAC|GACGCC	ACCCAC	GACGCC	3	135	52	0.0576923
ACCCCC|CCGACA	ACCCCC	CCGACA	3	150	52	0.0576923
ACGCCC|GACGCC	ACGCCC	GACGCC	3	110	52	0.0576923
AGGAGG|CACAAC	AGGAGG	CACAAC	3	184	52	0.0576923
CACTCC|CCGACA	CACTCC	CCGACA	3	88	52	0.0576923
CCACCC|TACCCC	CCACCC	TACCCC	3	298	52	0.0576923
CACCGA|CCACGC	CCACGC	CACCGA	3	148	52	0.0576923
CCCCAC|TACCCC	CCCCAC	TACCCC	3	289	52	0.0576923
CCCGAC|TACCCC	CCCGAC	TACCCC	3	127	52	0.0576923
CCCGGC|GACGCC	CCCGGC	GACGCC	3	69	52	0.0576923
CACCGA|CCGCCC	CCGCCC	CACCGA	3	336	52	0.0576923
CCGCCC|TACCCC	CCGCCC	TACCCC	3	336	52	0.0576923
CCGACA|CCGCCT	CCGCCT	CCGACA	3	91	52	0.0576923
CGACCA|TACCCC	CGACCA	TACCCC	3	51	52	0.0576923
CACCGA|CGCCCC	CGCCCC	CACCGA	3	292	52	0.0576923
CACCGA|CGCGCC	CGCGCC	CACCGA	3	135	52	0.0576923
CACAAC|GAGGAG	GAGGAG	CACAAC	3	65	52	0.0576923
CACAAC|GGAGGA	GGAGGA	CACAAC	3	119	52	0.0576923
GACGCC|TACACG	TACACG	GACGCC	3	31	52	0.0576923
CCTCCC|GCCCCC	CCTCCC	GCCCCC	10	229	174	0.0574713
CGCCCC|GCCCCC	CGCCCC	GCCCCC	10	292	174	0.0574713
AACACC|GCGCTC	AACACC	GCGCTC	2	53	35	0.0571429
AACCCG|ACCTAC	AACCCG	ACCTAC	2	38	35	0.0571429
ACAACA|TCCGCG	ACAACA	TCCGCG	2	40	35	0.0571429
ACACCC|GCGCTC	ACACCC	GCGCTC	2	90	35	0.0571429
ACACCG|GCACTC	ACACCG	GCACTC	2	58	35	0.0571429
ACCACC|CACCTA	ACCACC	CACCTA	2	132	35	0.0571429
ACCCCA|CGCATC	ACCCCA	CGCATC	2	98	35	0.0571429
ACCATC|ACCCCC	ACCCCC	ACCATC	2	150	35	0.0571429
ACCCCC|ACCTAC	ACCCCC	ACCTAC	2	150	35	0.0571429
ACCCCC|GCACTC	ACCCCC	GCACTC	2	150	35	0.0571429
ACCCCC|TCACCT	ACCCCC	TCACCT	2	150	35	0.0571429
ACCCCG|GCGACG	ACCCCG	GCGACG	2	90	35	0.0571429
ACCCGA|GAACGC	ACCCGA	GAACGC	2	51	35	0.0571429
ACCCGT|GCGACG	ACCCGT	GCGACG	2	33	35	0.0571429
ACCCTC|CGCATC	ACCCTC	CGCATC	2	93	35	0.0571429
ACCGCC|CACCTA	ACCGCC	CACCTA	2	137	35	0.0571429
ACCGCC|CGCATC	ACCGCC	CGCATC	2	137	35	0.0571429
AACCTC|ACGCAC	ACGCAC	AACCTC	2	87	35	0.0571429
ACCTAC|ACGCAC	ACGCAC	ACCTAC	2	87	35	0.0571429
ACGCCA|GCGCTC	ACGCCA	GCGCTC	2	58	35	0.0571429
ACGCGC|AGCCCA	ACGCGC	AGCCCA	2	74	35	0.0571429
AGAGGA|GAACGC	AGAGGA	GAACGC	2	60	35	0.0571429
AGCCAC|AGCCCA	AGCCAC	AGCCCA	2	44	35	0.0571429
AGCCCA|GCCGTC	AGCCCA	GCCGTC	2	35	35	0.0571429
AGCCCC|GCGACG	AGCCCC	GCGACG	2	65	35	0.0571429
CAACCC|TCACCT	CAACCC	TCACCT	2	95	35	0.0571429
CACAAC|TCCGCG	CACAAC	TCCGCG	2	52	35	0.0571429
CACATC|GCGCTC	CACATC	GCGCTC	2	41	35	0.0571429
CACCAC|CACCTA	CACCAC	CACCTA	2	163	35	0.0571429
CACCAC|GCGCTC	CACCAC	GCGCTC	2	163	35	0.0571429
CACCCA|CCACTG	CACCCA	CCACTG	2	116	35	0.0571429
CACCCC|GCACTC	CACCCC	GCACTC	2	242	35	0.0571429
CACCCC|TCACCT	CACCCC	TCACCT	2	242	35	0.0571429
CACCCT|TCACCT	CACCCT	TCACCT	2	96	35	0.0571429
CACCGC|GCACTC	CACCGC	GCACTC	2	179	35	0.0571429
CACGAC|GCCGTC	CACGAC	GCCGTC	2	66	35	0.0571429
CACGCC|CTCGCT	CACGCC	CTCGCT	2	153	35	0.0571429
CACGTC|CCACTG	CACGTC	CCACTG	2	42	35	0.0571429
CCAACG|CCACTG	CCAACG	CCACTG	2	50	35	0.0571429
ACCTAC|CCACAC	CCACAC	ACCTAC	2	136	35	0.0571429
CCACAC|CCACTG	CCACAC	CCACTG	2	136	35	0.0571429
CCACAT|GCGCTC	CCACAT	GCGCTC	2	33	35	0.0571429
CCACCA|CGCATC	CCACCA	CGCATC	2	132	35	0.0571429
CCACCA|CTCGCT	CCACCA	CTCGCT	2	132	35	0.0571429
CCACCA|GCGCTC	CCACCA	GCGCTC	2	132	35	0.0571429
CCACCC|TCCGCG	CCACCC	TCCGCG	2	298	35	0.0571429
ACCTAC|CCACCG	CCACCG	ACCTAC	2	150	35	0.0571429
CCACCG|TCACCT	CCACCG	TCACCT	2	150	35	0.0571429
CCACCG|TCCGCG	CCACCG	TCCGCG	2	150	35	0.0571429
CCACGA|GCCGTC	CCACGA	GCCGTC	2	40	35	0.0571429
CCACGC|CTCGCT	CCACGC	CTCGCT	2	148	35	0.0571429
CCACGT|CCACTG	CCACGT	CCACTG	2	36	35	0.0571429
CCACTC|CTGACC	CCACTC	CTGACC	2	98	35	0.0571429
CCCACA|CGCATC	CCCACA	CGCATC	2	105	35	0.0571429
ACCTAC|CCCACC	CCCACC	ACCTAC	2	321	35	0.0571429
CCCACC|CGTCCA	CCCACC	CGTCCA	2	321	35	0.0571429
CACCTA|CCCACG	CCCACG	CACCTA	2	118	35	0.0571429
CCCACG|GCGCTC	CCCACG	GCGCTC	2	118	35	0.0571429
CACCTA|CCCCAC	CCCCAC	CACCTA	2	289	35	0.0571429
CCCCAC|CCCTGA	CCCCAC	CCCTGA	2	289	35	0.0571429
CCCCAC|TCCCCG	CCCCAC	TCCCCG	4	289	70	0.0571429
CCCCAG|CGCATC	CCCCAG	CGCATC	2	42	35	0.0571429
CCCCCA|TCCGCG	CCCCCA	TCCGCG	2	138	35	0.0571429
ACCTAC|CCCCCC	CCCCCC	ACCTAC	2	162	35	0.0571429
CCCCCC|GCACTC	CCCCCC	GCACTC	2	162	35	0.0571429
ACCTAC|CCCCCT	CCCCCT	ACCTAC	2	123	35	0.0571429
ACCTAC|CCCCGC	CCCCGC	ACCTAC	2	259	35	0.0571429
CCCCGC|TCCCCG	CCCCGC	TCCCCG	4	259	70	0.0571429
AACCTC|CCCCTC	CCCCTC	AACCTC	2	218	35	0.0571429
ACCATC|CCCCTC	CCCCTC	ACCATC	2	218	35	0.0571429
ACCTAC|CCCCTC	CCCCTC	ACCTAC	2	218	35	0.0571429
CACCTA|CCCCTC	CCCCTC	CACCTA	2	218	35	0.0571429
CCCCTC|CGTCCA	CCCCTC	CGTCCA	2	218	35	0.0571429
ACACGC|CCCGAC	CCCGAC	ACACGC	4	127	70	0.0571429
ACCTAC|CCCGCA	CCCGCA	ACCTAC	2	102	35	0.0571429
ACCATC|CCCGCC	CCCGCC	ACCATC	2	319	35	0.0571429
AGCCCA|CCCGCC	CCCGCC	AGCCCA	2	319	35	0.0571429
CCCGTC|GCGACG	CCCGTC	GCGACG	2	107	35	0.0571429
ACCTAC|CCCTCC	CCCTCC	ACCTAC	2	259	35	0.0571429
CACCTA|CCCTCC	CCCTCC	CACCTA	2	259	35	0.0571429
CCCTGC|GCGCTC	CCCTGC	GCGCTC	2	84	35	0.0571429
AGCCCA|CCGACG	CCGACG	AGCCCA	2	53	35	0.0571429
CCACTG|CCGAGC	CCGAGC	CCACTG	2	37	35	0.0571429
CACCTA|CCGCAC	CCGCAC	CACCTA	2	141	35	0.0571429
AGCCCA|CCGCCA	CCGCCA	AGCCCA	2	131	35	0.0571429
CCGCCA|CTCGCT	CCGCCA	CTCGCT	2	131	35	0.0571429
ACCATC|CCGCCC	CCGCCC	ACCATC	2	336	35	0.0571429
CACCTA|CCGCCC	CCGCCC	CACCTA	2	336	35	0.0571429
CCGCCC|CGCCCA	CCGCCC	CGCCCA	8	336	140	0.0571429
CCGCCC|CTCGCT	CCGCCC	CTCGCT	2	336	35	0.0571429
CCGCCC|GCGACG	CCGCCC	GCGACG	2	336	35	0.0571429
CCGCCC|TCACCT	CCGCCC	TCACCT	2	336	35	0.0571429
CCGCCC|TCCCCG	CCGCCC	TCCCCG	4	336	70	0.0571429
CCGCCC|TCCGCG	CCGCCC	TCCGCG	2	336	35	0.0571429
CCGCCT|GCACTC	CCGCCT	GCACTC	2	91	35	0.0571429
CCGCGC|TCACCT	CCGCGC	TCACCT	2	129	35	0.0571429
CCGGCC|CTGACC	CCGGCC	CTGACC	2	81	35	0.0571429
AGCCCA|CCGTCG	CCGTCG	AGCCCA	2	44	35	0.0571429
CCTACC|GCGACG	CCTACC	GCGACG	2	82	35	0.0571429
ACCTAC|CCTCCC	CCTCCC	ACCTAC	2	229	35	0.0571429
CACCTA|CCTCCC	CCTCCC	CACCTA	2	229	35	0.0571429
CCTCCC|CGTCCA	CCTCCC	CGTCCA	2	229	35	0.0571429
CCTCCC|CTCGCT	CCTCCC	CTCGCT	2	229	35	0.0571429
CCTCCC|GCACTC	CCTCCC	GCACTC	2	229	35	0.0571429
CCTCCC|TCACCT	CCTCCC	TCACCT	2	229	35	0.0571429
CCCTGA|CCTCCG	CCTCCG	CCCTGA	2	86	35	0.0571429
ACCTAC|CCTCGA	CCTCGA	ACCTAC	2	39	35	0.0571429
CCTCGC|CTGACC	CCTCGC	CTGACC	2	109	35	0.0571429
AGCCCA|CGACGC	CGACGC	AGCCCA	2	80	35	0.0571429
AACCTC|CGCACC	CGCACC	AACCTC	2	145	35	0.0571429
AGCCCA|CGCCAC	CGCCAC	AGCCCA	2	176	35	0.0571429
CGCCAC|CTCGCT	CGCCAC	CTCGCT	2	176	35	0.0571429
CGCCAC|GCGCTC	CGCCAC	GCGCTC	2	176	35	0.0571429
CGCCCA|GCGACG	CGCCCA	GCGACG	2	140	35	0.0571429
ACCTAC|CGCCCC	CGCCCC	ACCTAC	2	292	35	0.0571429
CACCTA|CGCCCC	CGCCCC	CACCTA	2	292	35	0.0571429
AACCTC|CGCCGA	CGCCGA	AACCTC	2	53	35	0.0571429
ACGCAA|CGCCGA	CGCCGA	ACGCAA	2	53	35	0.0571429
AGCCCA|CGCCGT	CGCCGT	AGCCCA	2	38	35	0.0571429
CACCTA|CGCCGT	CGCCGT	CACCTA	2	38	35	0.0571429
AGCCCA|CGCCTA	CGCCTA	AGCCCA	2	33	35	0.0571429
CGCCTC|CTGACC	CGCCTC	CTGACC	2	96	35	0.0571429
CGCCTC|GCACTC	CGCCTC	GCACTC	2	96	35	0.0571429
CGCGCC|TCACCT	CGCGCC	TCACCT	2	135	35	0.0571429
CGCGCG|CGTCCA	CGCGCG	CGTCCA	2	77	35	0.0571429
CGCGGC|CGTCCA	CGCGGC	CGTCCA	2	42	35	0.0571429
CCACTG|CGCTCC	CGCTCC	CCACTG	2	112	35	0.0571429
CCCTGA|CGGCCC	CGGCCC	CCCTGA	2	68	35	0.0571429
CGGCCC|CGTCCA	CGGCCC	CGTCCA	2	68	35	0.0571429
CGGCCC|CTGACC	CGGCCC	CTGACC	2	68	35	0.0571429
CCCTGA|CGGCCG	CGGCCG	CCCTGA	2	42	35	0.0571429
CTACAC|GCACTC	CTACAC	GCACTC	2	46	35	0.0571429
CTACCC|GCGACG	CTACCC	GCGACG	2	68	35	0.0571429
CTCCAC|TCCGCG	CTCCAC	TCCGCG	2	97	35	0.0571429
CGTCCA|CTCCCA	CTCCCA	CGTCCA	2	62	35	0.0571429
ACCATC|CTCCCC	CTCCCC	ACCATC	2	188	35	0.0571429
CTCCCC|GCACTC	CTCCCC	GCACTC	2	188	35	0.0571429
CTCCCC|GCCGTC	CTCCCC	GCCGTC	2	188	35	0.0571429
CTCCCC|TCACCT	CTCCCC	TCACCT	2	188	35	0.0571429
CTCCCG|CTCGCT	CTCCCG	CTCGCT	2	75	35	0.0571429
CTCCCT|GCACTC	CTCCCT	GCACTC	2	79	35	0.0571429
CCCTGA|CTCCGC	CTCCGC	CCCTGA	2	86	35	0.0571429
ACCATC|GAAGGA	GAAGGA	ACCATC	2	110	35	0.0571429
CGCATC|GACCCC	GACCCC	CGCATC	2	70	35	0.0571429
AGCCCA|GACGCG	GACGCG	AGCCCA	2	39	35	0.0571429
GAGGAG|GCACTC	GAGGAG	GCACTC	2	65	35	0.0571429
ACGCAA|GAGGAT	GAGGAT	ACGCAA	2	65	35	0.0571429
AACCTC|GCACGC	GCACGC	AACCTC	2	66	35	0.0571429
CACCTA|GCCAAC	GCCAAC	CACCTA	2	45	35	0.0571429
GCCACA|GCGCTC	GCCACA	GCGCTC	2	59	35	0.0571429
CTCGCT|GCCACC	GCCACC	CTCGCT	2	133	35	0.0571429
AACCTC|GCCCAA	GCCCAA	AACCTC	2	42	35	0.0571429
GCCCAG|GGCGCG	GCCCAG	GGCGCG	2	41	35	0.0571429
CTCGCT|GCCCCA	GCCCCA	CTCGCT	2	123	35	0.0571429
CTCGCT|GCCCCC	GCCCCC	CTCGCT	2	174	35	0.0571429
GCCCCC|GCGCTC	GCCCCC	GCGCTC	2	174	35	0.0571429
GCCCCC|TCCGCG	GCCCCC	TCCGCG	2	174	35	0.0571429
ACCTAC|GCCCCG	GCCCCG	ACCTAC	2	117	35	0.0571429
GCACTC|GCCCCG	GCCCCG	GCACTC	2	117	35	0.0571429
CCCTGA|GCCCGC	GCCCGC	CCCTGA	2	108	35	0.0571429
CTGACC|GCCCGC	GCCCGC	CTGACC	2	108	35	0.0571429
CGTCCA|GCCCGT	GCCCGT	CGTCCA	2	39	35	0.0571429
ACCATC|GCCGCC	GCCGCC	ACCATC	2	109	35	0.0571429
AGCCCA|GCCGTC	GCCGTC	AGCCCA	2	35	35	0.0571429
CTCGCT|GCCTCC	GCCTCC	CTCGCT	2	72	35	0.0571429
GCACTC|GCCTCC	GCCTCC	GCACTC	2	72	35	0.0571429
GACCCC|GCGCCC	GCGCCC	GACCCC	4	90	70	0.0571429
GCGCCC|TCCGCG	GCGCCC	TCCGCG	2	90	35	0.0571429
AGCCCA|GCGCCG	GCGCCG	AGCCCA	2	48	35	0.0571429
AGCCCA|GCGCCT	GCGCCT	AGCCCA	2	33	35	0.0571429
GCGCTC|GCTCGC	GCTCGC	GCGCTC	2	42	35	0.0571429
GAACGC|GGAACA	GGAACA	GAACGC	2	31	35	0.0571429
CCCTGA|GGAGAC	GGAGAC	CCCTGA	2	44	35	0.0571429
GCACTC|GGCCAC	GGCCAC	GCACTC	2	53	35	0.0571429
CCCTGA|GGCCCG	GGCCCG	CCCTGA	2	51	35	0.0571429
CGTCCA|GGCCCG	GGCCCG	CGTCCA	2	51	35	0.0571429
CTGACC|GGCCCG	GGCCCG	CTGACC	2	51	35	0.0571429
GCCGTC|TCCCCC	TCCCCC	GCCGTC	2	102	35	0.0571429
CTGACC|TCCCCG	TCCCCG	CTGACC	2	70	35	0.0571429
ACCATC|TCCCCT	TCCCCT	ACCATC	2	63	35	0.0571429
GCACTC|TCCCTC	TCCCTC	GCACTC	2	82	35	0.0571429
CCCTGA|TCCGCC	TCCGCC	CCCTGA	2	76	35	0.0571429
CGTCCA|TCCTCC	TCCTCC	CGTCCA	2	51	35	0.0571429
TCCGCG|TCGCGC	TCGCGC	TCCGCG	2	39	35	0.0571429
ATGGAG|GCGACG	ATGGAG	GCGACG	2	22	35	0.0571429
GAGCCC|GCCGTC	GAGCCC	GCCGTC	2	30	35	0.0571429
CCCTGA|GGAACG	GGAACG	CCCTGA	2	29	35	0.0571429
ACACGC|GGACGC	GGACGC	ACACGC	4	29	70	0.0571429
CGCATC|GGACGC	GGACGC	CGCATC	2	29	35	0.0571429
ACCCGC|CGCCCG	ACCCGC	CGCCCG	7	118	123	0.0569106
CCCACC|CGCCCG	CCCACC	CGCCCG	7	321	123	0.0569106
CCCCTC|GCCCCA	CCCCTC	GCCCCA	7	218	123	0.0569106
CACGCC|CACTCC	CACGCC	CACTCC	5	153	88	0.0568182
ACCCCT|CCCACC	CCCACC	ACCCCT	5	321	88	0.0568182
CACTCC|CCCCGC	CCCCGC	CACTCC	5	259	88	0.0568182
ACCCCT|CCCCTC	CCCCTC	ACCCCT	5	218	88	0.0568182
ACCCCT|CCCTCC	CCCTCC	ACCCCT	5	259	88	0.0568182
CCCTCC|CGCCAC	CCCTCC	CGCCAC	10	259	176	0.0568182
CACTCC|CCGCCT	CCGCCT	CACTCC	5	91	88	0.0568182
CCTCCC|CGCCCC	CGCCCC	CCTCCC	13	292	229	0.0567686
ACCCAC|CGCGTC	ACCCAC	CGCGTC	3	135	53	0.0566038
ACCCCC|CCCCAT	ACCCCC	CCCCAT	3	150	53	0.0566038
ACCCGA|CGCCGA	ACCCGA	CGCCGA	3	51	53	0.0566038
ACCGCC|CCGACG	ACCGCC	CCGACG	3	137	53	0.0566038
ACGCAC|CGCGTC	ACGCAC	CGCGTC	3	87	53	0.0566038
CAACCC|CCCCGG	CAACCC	CCCCGG	3	95	53	0.0566038
CACCCA|CGCGTC	CACCCA	CGCGTC	3	116	53	0.0566038
CACCCC|CCCCAT	CACCCC	CCCCAT	3	242	53	0.0566038
CCACAC|GGCCAC	CCACAC	GGCCAC	3	136	53	0.0566038
CCACCC|CGCCGA	CCACCC	CGCCGA	3	298	53	0.0566038
CCACCG|CCCCAT	CCACCG	CCCCAT	3	150	53	0.0566038
CCACGC|CGCGTC	CCACGC	CGCGTC	3	148	53	0.0566038
CAACGC|CCCACC	CCCACC	CAACGC	3	321	53	0.0566038
CCCACC|CGCGTC	CCCACC	CGCGTC	3	321	53	0.0566038
ACGACC|CCCCAC	CCCCAC	ACGACC	3	289	53	0.0566038
CCCCAC|CGCCGA	CCCCAC	CGCCGA	3	289	53	0.0566038
CCAACC|CCCCCC	CCCCCC	CCAACC	6	162	106	0.0566038
CAACGC|CCCCGC	CCCCGC	CAACGC	3	259	53	0.0566038
CCCCGC|CCCCGG	CCCCGC	CCCCGG	3	259	53	0.0566038
AACACC|CCCGCC	CCCGCC	AACACC	3	319	53	0.0566038
CAACGC|CCCGCC	CCCGCC	CAACGC	3	319	53	0.0566038
CCCCAT|CCCGCC	CCCGCC	CCCCAT	3	319	53	0.0566038
CCCCGG|CCCGCC	CCCGCC	CCCCGG	3	319	53	0.0566038
CCCCAT|CCCTAC	CCCTAC	CCCCAT	3	82	53	0.0566038
CCGCAC|CGCGTC	CCGCAC	CGCGTC	3	141	53	0.0566038
CCCCAT|CCGCCC	CCGCCC	CCCCAT	3	336	53	0.0566038
CAACGC|CCTCCC	CCTCCC	CAACGC	3	229	53	0.0566038
CGCCAC|CGCCGA	CGCCAC	CGCCGA	3	176	53	0.0566038
CCCCAT|CGCCCC	CGCCCC	CCCCAT	3	292	53	0.0566038
AACACC|CGTCCG	CGTCCG	AACACC	3	41	53	0.0566038
CAACGC|CTGCCC	CTGCCC	CAACGC	3	78	53	0.0566038
CGCGTC|GCACGC	GCACGC	CGCGTC	3	66	53	0.0566038
CCGACG|GCCCCA	GCCCCA	CCGACG	3	123	53	0.0566038
CGCGTC|GCCCCC	GCCCCC	CGCGTC	3	174	53	0.0566038
CCACCC|CGTCCC	CCACCC	CGTCCC	4	298	71	0.056338
CGACCG|CTCACC	CTCACC	CGACCG	4	123	71	0.056338
CCCACC|CTCGCC	CCCACC	CTCGCC	6	321	107	0.0560748
AACCCC|CACGCT	AACCCC	CACGCT	2	59	36	0.0555556
AAGGAG|TCACCA	AAGGAG	TCACCA	2	209	36	0.0555556
ACAACC|CACGCT	ACAACC	CACGCT	2	37	36	0.0555556
ACACGC|GCCATC	ACACGC	GCCATC	2	70	36	0.0555556
ACCCAC|CACGCT	ACCCAC	CACGCT	2	135	36	0.0555556
ACCCAC|CCACGT	ACCCAC	CCACGT	2	135	36	0.0555556
ACCCAC|GCCATC	ACCCAC	GCCATC	2	135	36	0.0555556
ACCCCA|CACGCT	ACCCCA	CACGCT	2	98	36	0.0555556
ACCCCC|CCACGT	ACCCCC	CCACGT	2	150	36	0.0555556
ACCCCC|GCGCCC	ACCCCC	GCGCCC	5	150	90	0.0555556
ACCCGC|GCCCAT	ACCCGC	GCCCAT	2	118	36	0.0555556
ACCGTC|CGGCCA	ACCGTC	CGGCCA	2	32	36	0.0555556
ACCTCA|GAGGCC	ACCTCA	GAGGCC	2	56	36	0.0555556
ACGCCA|GCCATC	ACGCCA	GCCATC	2	58	36	0.0555556
ACGCCT|CCGCGG	ACGCCT	CCGCGG	2	40	36	0.0555556
ACATCC|ACGGAG	ACGGAG	ACATCC	2	49	36	0.0555556
AGAGGA|AGGTAA	AGAGGA	AGGTAA	2	60	36	0.0555556
AGCCAC|CCACGT	AGCCAC	CCACGT	2	44	36	0.0555556
AGGAGG|TCACCA	AGGAGG	TCACCA	2	184	36	0.0555556
CAACCC|CACGCT	CAACCC	CACGCT	2	95	36	0.0555556
ACCCCG|CACACC	CACACC	ACCCCG	5	132	90	0.0555556
ACCGCA|CACACC	CACACC	ACCGCA	3	132	54	0.0555556
CACACG|GCCATC	CACACG	GCCATC	2	64	36	0.0555556
CACCAC|CCCGCT	CACCAC	CCCGCT	4	163	72	0.0555556
CACCCA|CACGCT	CACCCA	CACGCT	2	116	36	0.0555556
CACCCA|GCCATC	CACCCA	GCCATC	2	116	36	0.0555556
CACCCC|TCACCA	CACCCC	TCACCA	2	242	36	0.0555556
CACCGC|GCGCCC	CACCGC	GCGCCC	5	179	90	0.0555556
CACCGC|TGCCCG	CACCGC	TGCCCG	2	179	36	0.0555556
CACCGG|GCCCAT	CACCGG	GCCCAT	2	45	36	0.0555556
CACCTC|CCGCGG	CACCTC	CCGCGG	2	116	36	0.0555556
CACCTC|GAGGCC	CACCTC	GAGGCC	2	116	36	0.0555556
CACGCC|CCGCGG	CACGCC	CCGCGG	2	153	36	0.0555556
CACGCC|GCCATC	CACGCC	GCCATC	2	153	36	0.0555556
CACGTC|TGCCCG	CACGTC	TGCCCG	2	42	36	0.0555556
ACATCC|CACTCC	CACTCC	ACATCC	2	88	36	0.0555556
CACTCC|TGCCCG	CACTCC	TGCCCG	2	88	36	0.0555556
CACTGC|CCACGT	CACTGC	CCACGT	2	38	36	0.0555556
CATCGC|GACCCG	CATCGC	GACCCG	2	38	36	0.0555556
CACGCT|CCAACC	CCAACC	CACGCT	2	106	36	0.0555556
CCACAC|GCCATC	CCACAC	GCCATC	2	136	36	0.0555556
CACGCT|CCACCC	CCACCC	CACGCT	2	298	36	0.0555556
CCACCG|GCCATC	CCACCG	GCCATC	2	150	36	0.0555556
CCACCT|GAGGCC	CCACCT	GAGGCC	2	109	36	0.0555556
CACGCT|CCACGC	CCACGC	CACGCT	2	148	36	0.0555556
CCACGC|CCCCTA	CCACGC	CCCCTA	3	148	54	0.0555556
CCACGC|CCGCGG	CCACGC	CCGCGG	2	148	36	0.0555556
CCACGT|TGCCCG	CCACGT	TGCCCG	2	36	36	0.0555556
CCACTA|TGCCCG	CCACTA	TGCCCG	2	44	36	0.0555556
CCACGT|CCACTG	CCACTG	CCACGT	2	35	36	0.0555556
CCATCC|CGGCCA	CCATCC	CGGCCA	2	81	36	0.0555556
CCATCC|GCCATC	CCATCC	GCCATC	2	81	36	0.0555556
CCATCG|GACCCG	CCATCG	GACCCG	2	40	36	0.0555556
CACGCT|CCCAAC	CCCAAC	CACGCT	2	106	36	0.0555556
CCCACA|GCCATC	CCCACA	GCCATC	2	105	36	0.0555556
CACGCT|CCCACC	CCCACC	CACGCT	2	321	36	0.0555556
CATCCC|CCCACC	CCCACC	CATCCC	4	321	72	0.0555556
CCACGT|CCCACC	CCCACC	CCACGT	2	321	36	0.0555556
CCCACC|GCCCAT	CCCACC	GCCCAT	2	321	36	0.0555556
CACGCT|CCCACG	CCCACG	CACGCT	2	118	36	0.0555556
ACATCC|CCCACT	CCCACT	ACATCC	2	86	36	0.0555556
CCCATC|CCGCGG	CCCATC	CCGCGG	2	78	36	0.0555556
CACGCT|CCCCAA	CCCCAA	CACGCT	2	58	36	0.0555556
ACATCC|CCCCAC	CCCCAC	ACATCC	2	289	36	0.0555556
CACGCT|CCCCAC	CCCCAC	CACGCT	2	289	36	0.0555556
CATCCC|CCCCAC	CCCCAC	CATCCC	4	289	72	0.0555556
CCCCAC|CGGCCA	CCCCAC	CGGCCA	2	289	36	0.0555556
CCACGT|CCCCAT	CCCCAT	CCACGT	2	53	36	0.0555556
CCCCCA|GCCCAT	CCCCCA	GCCCAT	2	138	36	0.0555556
ACATCC|CCCCCC	CCCCCC	ACATCC	2	162	36	0.0555556
CCCCCC|CCCCTA	CCCCCC	CCCCTA	3	162	54	0.0555556
CCCCCT|CCCCTA	CCCCCT	CCCCTA	3	123	54	0.0555556
CCCCGC|CCCCTA	CCCCGC	CCCCTA	3	259	54	0.0555556
CCCCTC|GCCATC	CCCCTC	GCCATC	2	218	36	0.0555556
CCACGT|CCCGCC	CCCGCC	CCACGT	2	319	36	0.0555556
CCCCTA|CCCGCC	CCCGCC	CCCCTA	3	319	54	0.0555556
CCCGCC|GCCTCC	CCCGCC	GCCTCC	4	319	72	0.0555556
CCCGCC|TGCCCG	CCCGCC	TGCCCG	2	319	36	0.0555556
CCCGCC|GACCCG	CCCGCC	GACCCG	2	319	36	0.0555556
CCCGCC|TCACCA	CCCGCC	TCACCA	2	319	36	0.0555556
CACGCT|CCCGCG	CCCGCG	CACGCT	2	101	36	0.0555556
CCACGT|CCCGCG	CCCGCG	CCACGT	2	101	36	0.0555556
CCCGCT|CCCGTC	CCCGTC	CCCGCT	4	107	72	0.0555556
ACCGCA|CCCTCC	CCCTCC	ACCGCA	3	259	54	0.0555556
CCCTCC|CCGCGG	CCCTCC	CCGCGG	2	259	36	0.0555556
CCCTCC|GCACCC	CCCTCC	GCACCC	6	259	108	0.0555556
CCCTCC|GCCCAT	CCCTCC	GCCCAT	2	259	36	0.0555556
CCCTCC|TCACCA	CCCTCC	TCACCA	2	259	36	0.0555556
CACGCT|CCCTGC	CCCTGC	CACGCT	2	84	36	0.0555556
ACATCC|CCGACA	CCGACA	ACATCC	2	52	36	0.0555556
ACCGCA|CCGACC	CCGACC	ACCGCA	3	131	54	0.0555556
CCGACC|GCCATC	CCGACC	GCCATC	2	131	36	0.0555556
CCGAGC|TCACCA	CCGAGC	TCACCA	2	37	36	0.0555556
CCACGT|CCGCCG	CCGCCG	CCACGT	2	109	36	0.0555556
CCGCTC|GACCCG	CCGCTC	GACCCG	2	94	36	0.0555556
CCGTCC|GCCCAT	CCGTCC	GCCCAT	2	107	36	0.0555556
CCTCAC|GAGGCC	CCTCAC	GAGGCC	2	139	36	0.0555556
CCCGCT|CCTCCA	CCTCCA	CCCGCT	4	96	72	0.0555556
CCTCCA|TCACCA	CCTCCA	TCACCA	2	96	36	0.0555556
ACCGCA|CCTCCT	CCTCCT	ACCGCA	3	63	54	0.0555556
CCCCTA|CCTCCT	CCTCCT	CCCCTA	3	63	54	0.0555556
CCTCGC|GCCATC	CCTCGC	GCCATC	2	109	36	0.0555556
ACATCC|CCTCTC	CCTCTC	ACATCC	2	68	36	0.0555556
CACGCT|CCTGCC	CCTGCC	CACGCT	2	95	36	0.0555556
CCTGCC|CGGCCA	CCTGCC	CGGCCA	2	95	36	0.0555556
CCTGCC|TGCCCG	CCTGCC	TGCCCG	2	95	36	0.0555556
CGACAC|GAGGCC	CGACAC	GAGGCC	2	65	36	0.0555556
CACGCT|CGACCG	CGACCG	CACGCT	2	71	36	0.0555556
CACGCT|CGCCAC	CGCCAC	CACGCT	2	176	36	0.0555556
CGCCAC|GCCCAT	CGCCAC	GCCCAT	2	176	36	0.0555556
CGCCAT|GCCATC	CGCCAT	GCCATC	2	48	36	0.0555556
CGCCCA|GACCCG	CGCCCA	GACCCG	2	140	36	0.0555556
CCACGT|CGCCCC	CGCCCC	CCACGT	2	292	36	0.0555556
[truncated: 51,277 more rows]
